# Supplementary material for: Selective formation of Pt12L24 nanospheres by ligand design
Source: Royal Society of Chemistry journal article supplement (doi:10.1039/d1sc01295a), 2021-01-01
Supplement: d1sc01295a1.pdf [file d1sc01295a1.pdf]

Supporting information for

## Selective formation of Pt<sub>12</sub>L<sub>24</sub> nanospheres by ligand design

Eduard. O. Bobylev,<sup>†</sup> David A. Poole III,<sup>†</sup> Bas de Bruin<sup>†</sup> and Joost N. H. Reek<sup>\*†</sup>

<sup>†</sup> van 't Hoff Institute for Molecular Sciences, University of Amsterdam, Science Park 904, 1098 XH Amsterdam, the Netherlands.

### List of content:

|                                                                                              |     |
|----------------------------------------------------------------------------------------------|-----|
| SI1: Synthesis of building blocks                                                            | 3   |
| SI2: Sphere synthesis                                                                        | 27  |
| SI3: Variable temperature studies                                                            | 73  |
| SI4: Ligand exchange studies                                                                 | 84  |
| SI5: Application for other structures                                                        | 104 |
| SI6: Possible formation pathways                                                             | 108 |
| SI7: Computational Methods and calculated relative energies for different type of assemblies | 109 |
| SI8: MS calibration of LOMe and LPy and MSMS analysis                                        | 110 |
| SI9: Colum chromatography on self-assembled Pt <sub>n</sub> L <sup>OMe</sup> <sub>2n</sub>   | 116 |
| SI10: Hydrodynamic Radius Considerations                                                     | 118 |

## Materials and methods

**General procedures:** All synthetic procedures were carried out under an nitrogen atmosphere using standard Schlenk techniques. All commercially available chemicals were used as received without further purification. Solvents used for synthesis were dried, distilled and degassed with the most suitable method. Column chromatography was performed open to air using solvents as received.

**Cryospray-ionization MS (CSI-MS):** Mass spectra were collected on a HR-ToF Bruker Daltonik GmbH (Bremen, Germany) Impact II, an ESI-ToF MS capable of resolution of at least 40000 FWHM, which was coupled to a Bruker cryo-spray unit. Detection was in positive-ion mode and the source voltage was between 4 and 6 kV. The sample was introduced with a syringe pump at a flow rate of 18  $\mu\text{l/hr}$ . The drying gas ( $\text{N}_2$ ) was held at 40°C and the spray gas was held at 60°C. The machine was calibrated prior to every experiment via direct infusion of a TFA-Na solution, which provided a m/z range of singly charged peaks up to 3500 Da in both ion modes. Software acquisition Compass 2.0 for Otof series. Software processing m-mass.

## Synthesis of building blocks (SI1)

### Synthesis of **L<sup>OMe</sup>**

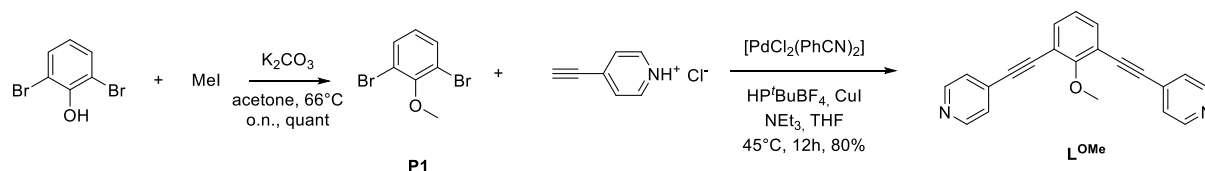

**Scheme S1.** Synthetic route for **L<sup>OMe</sup>**.

The building block **L<sup>OMe</sup>** was synthesized according to a modified literature procedure.<sup>[1,2]</sup>

Briefly: Intermediate **P1** was synthesized by refluxing a solution of 2,6-dibromophenol (2 g, 8 mmol, 1 eq.), potassium carbonate (3.3 g, 23.8 mmol, 3 eq.) and MeI (1.7 g, 12 mmol, 1.5 eq.) in 100 mL acetone overnight. The volatiles were removed under reduced pressure. The solid was taken up into 200 mL DCM and washed with 3x100 mL  $NaOH_{aq}$  (1M). The organic phase was separated, dried with  $Na_2SO_4$  and the volatiles were removed under reduced pressure to afford **P1** as a colorless oil (2.1g, quant).

$HP^tBuBF_4$  (130 mg, 0.45 mmol, 0.12 eq.) and  $Pd(PhCN)_2Cl_2$  (86 mg, 0.225 mmol, 0.06 eq.) were dissolved in a mixture of degassed THF (20 mL) and trimethylamine (20 mL). The solution was stirred 20 min at room temperature before 2,6-dibromo-methoxybenzen (1.00 g, 3.75 mmol, 1 eq.) and 4-ethynylpyridine hydrochloride (1.22 g, 9.39 mmol, 2.5 eq.) were added. The solution was gently heated up to  $45^\circ C$  and copper(I) iodide (30 mg, 0.15 mmol) was added. This mixture was stirred at  $45^\circ C$  for 24 h under nitrogen atmosphere. The reaction mixture was poured into 400 mL ethylacetate, filtrated over a pad of sand and evaporated in *vacuo*. The crude product was purified by column chromatography on silica gel (DCM/MeOH = 99/1) to give **L<sup>OMe</sup>** as a white powder (0.93g, 80%).  $^1H$  NMR (400 MHz, Acetonitrile- $d_3$ )  $\delta$  8.65 (d,  $J = 6.1$  Hz, 4H), 7.65 (d,  $J = 7.7$  Hz, 2H), 7.59 – 7.32 (m, 4H), 7.23 (t,  $J = 7.7$  Hz, 1H), 4.17 (s, 3H). LogD( $m^2/s$ ) at  $25^\circ C$  (MeCN- $d_3$ ): -8.823 ( $d = 0.84$  nm).

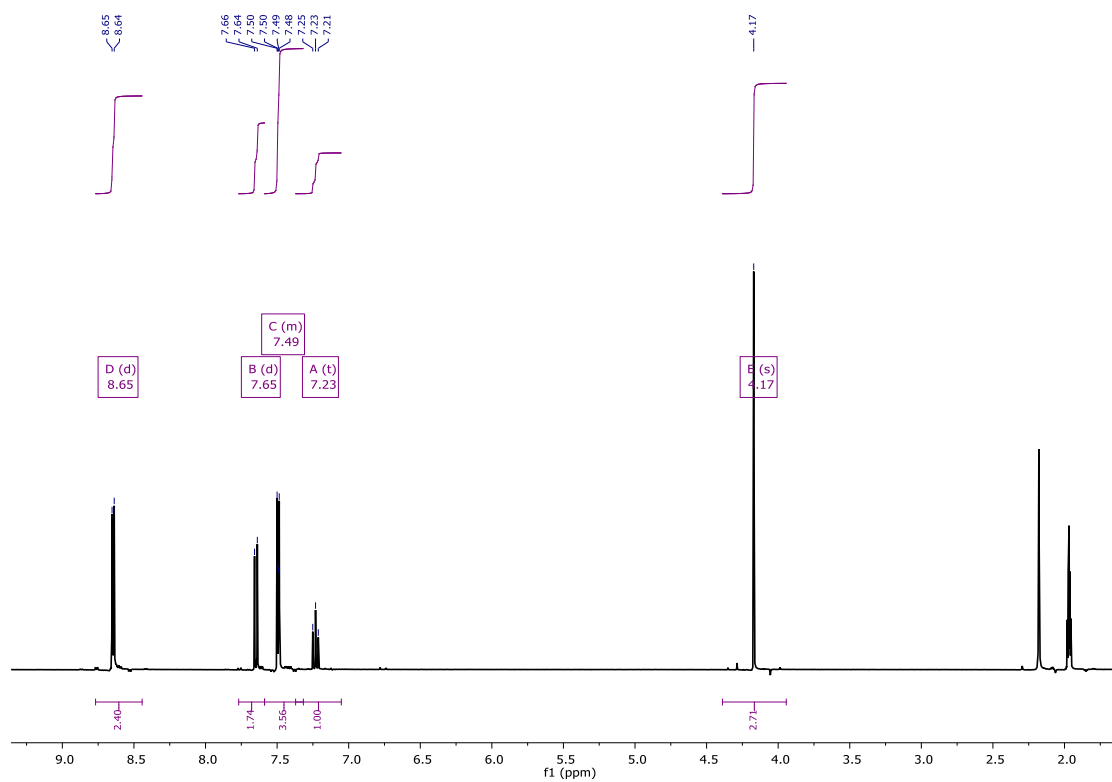

**Figure S1.** LOMe building block,  $^1\text{H}$  NMR in  $\text{MeCN-d}_3$ .

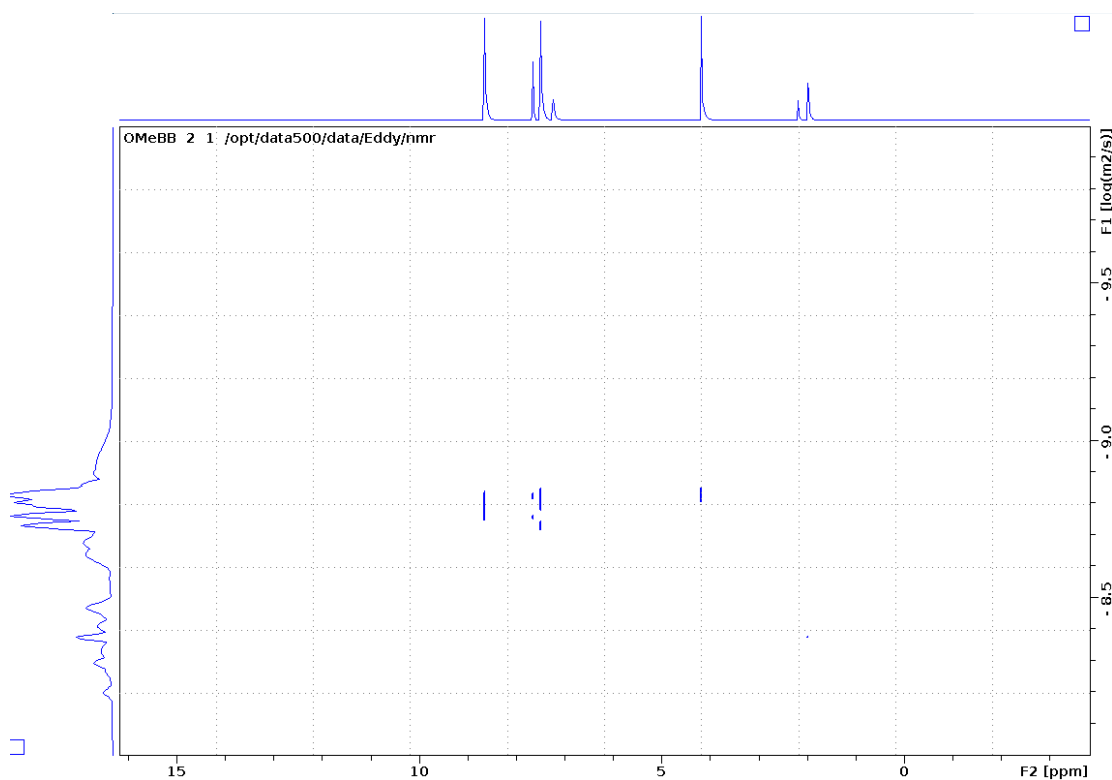

**Figure S2.** LOMe building block, DOSY NMR in  $\text{MeCN-d}_3$  at  $25^\circ\text{C}$ .



## Synthesis of **L<sup>OBn</sup>**

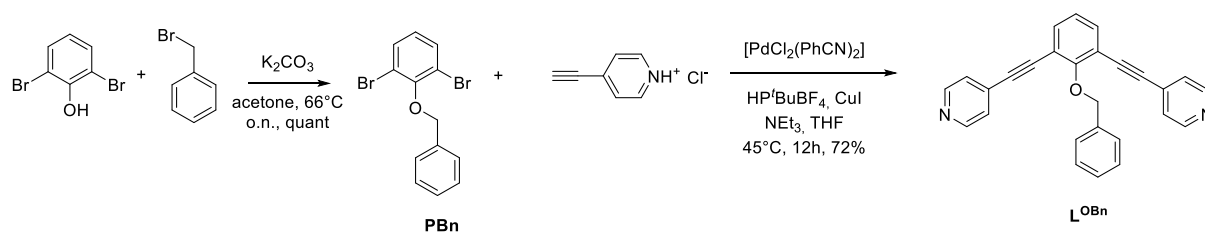

### Scheme S2. Synthetic route for **L<sup>OBn</sup>**.

The intermediate **PBn** was synthesized according to a modified literature procedure.<sup>[3]</sup>

Briefly: Intermediate **PBn** was synthesized by refluxing a solution of 2,6-dibromophenol (2 g, 8 mmol, 1 eq.), potassium carbonate (3.3 g, 23.8 mmol, 3 eq.) and benzylbromide (2.05 g, 12 mmol, 1.5 eq.) in 100 mL acetone overnight. The volatiles were removed under reduced pressure. The solid was taken up into 200 mL DCM and washed with 3x100 mL  $NaOH_{aq}$  (1M). The organic phase was separated, dried with  $Na_2SO_4$  and the volatiles were removed under reduced pressure to afford **PBn** as a colorless oil (2.7 g, quant).

$HP^tBuBF_4$  (130 mg, 0.45 mmol, 0.12 eq.) and  $Pd(PhCN)_2Cl_2$  (86 mg, 0.225 mmol, 0.06 eq.) were dissolved in a mixture of degassed THF (20 mL) and trimethylamine (20 mL). The solution was stirred 20 min at room temperature before **PBn** (1.28 g, 3.75 mmol, 1 eq.) and 4-ethynylpyridine hydrochloride (1.22 g, 9.39 mmol, 2.5 eq.) were added. The solution was gently heated up to  $45^\circ C$  and copper(I) iodide (30 mg, 0.15 mmol) was added. This mixture was stirred at  $45^\circ C$  for 24 h under nitrogen atmosphere. The reaction mixture was poured into 400 mL ethylacetate, filtrated over a pad of sand and evaporated in *vacuo*. The crude product was purified by column chromatography on silica gel (DCM/MeOH = 99/1) to give **L<sup>OBn</sup>** as a white powder (1 g, 72%).  $^1H$  NMR (400 MHz, Acetonitrile- $d_3$ )  $\delta$  8.66 – 8.58 (m, 4H), 7.66 (d,  $J = 7.7$  Hz, 2H), 7.62 – 7.56 (m, 2H), 7.43 – 7.35 (m, 6H), 7.25 (t,  $J = 7.7$  Hz, 1H), 5.41 (s, 2H).  $^{13}C$  NMR (101 MHz,  $CD_3CN$ )  $\delta$  161.02, 150.01, 137.13, 134.85, 130.49, 128.48, 128.31, 125.23, 124.43, 91.20, 89.15, 76.13.  $\text{LogD}(m^2/s)$  at  $25^\circ C$  (MeCN- $d_3$ ): -8.783 ( $d = 0.96$  nm). HR-ESI-MS, calculated for  $[C_{27}H_{18}N_2O]H^+$  387.1492, obtained 387.1356.

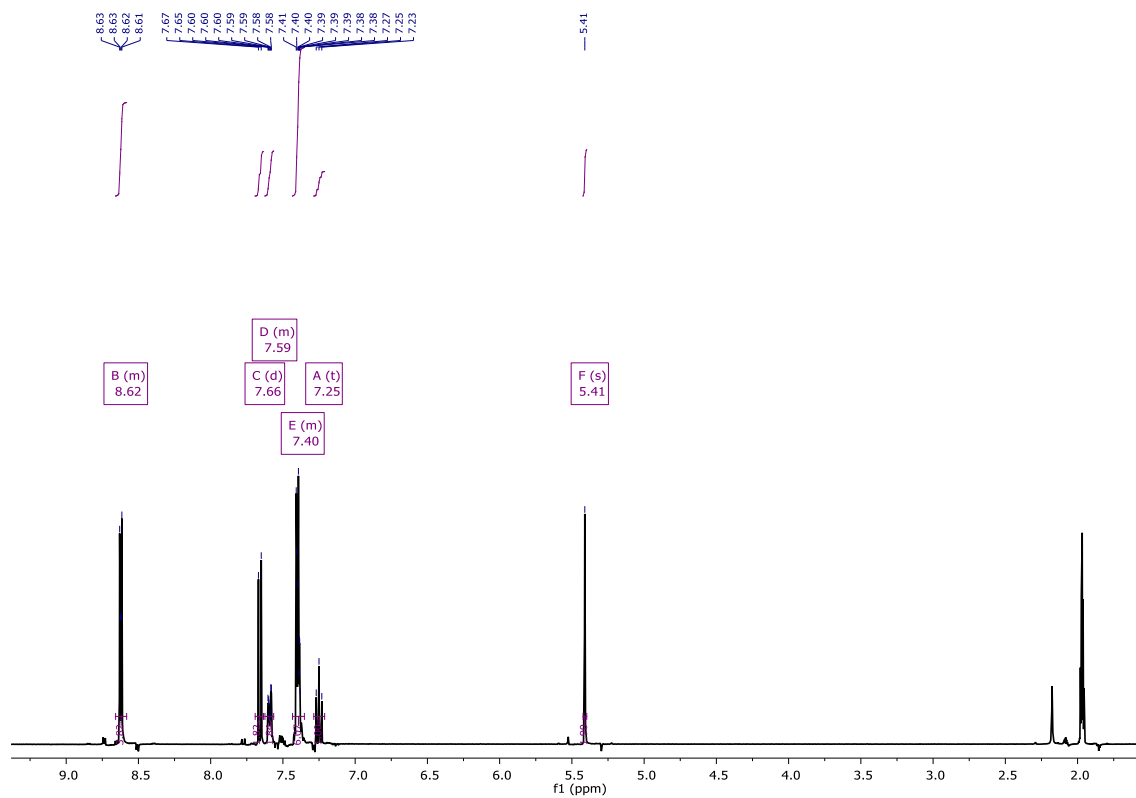

Figure S3.  $L^{OBn}$  building block,  $^1H$  NMR in  $MeCN-d_3$ .

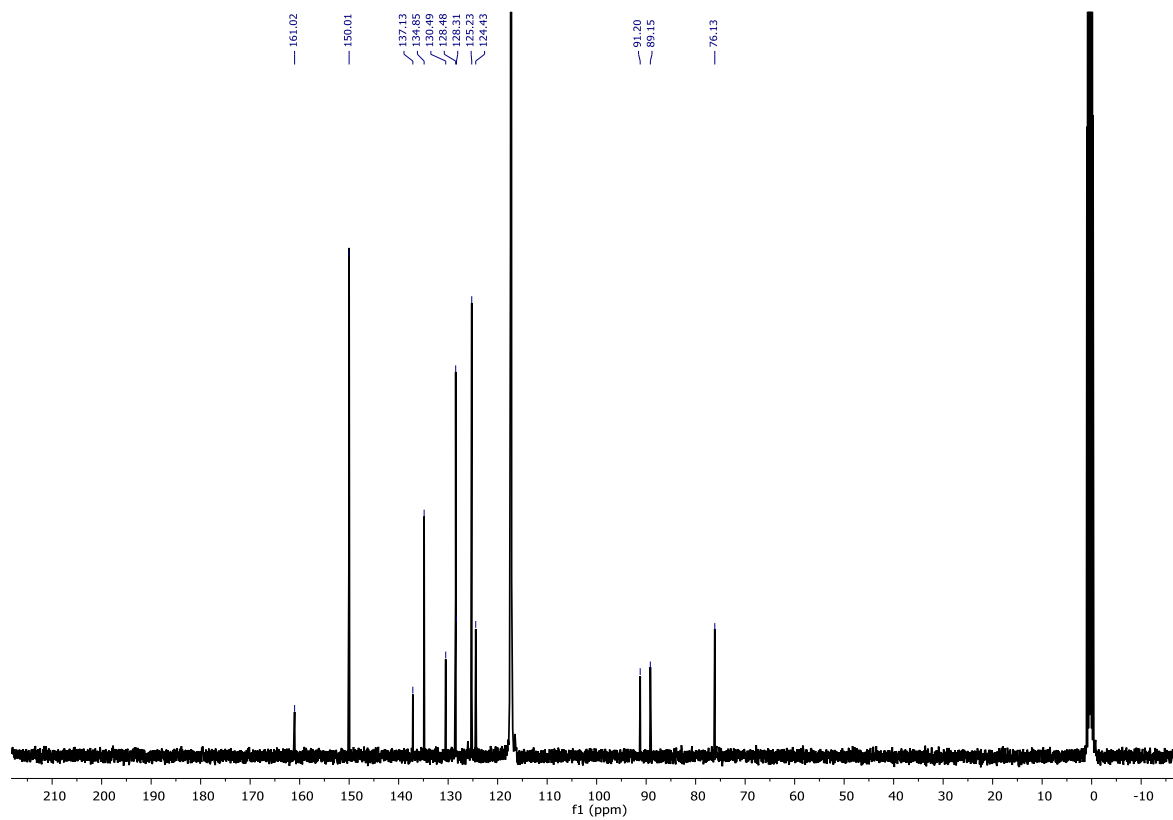

Figure S4.  $L^{OBn}$  building block,  $^{13}C$  NMR in  $MeCN-d_3$ .

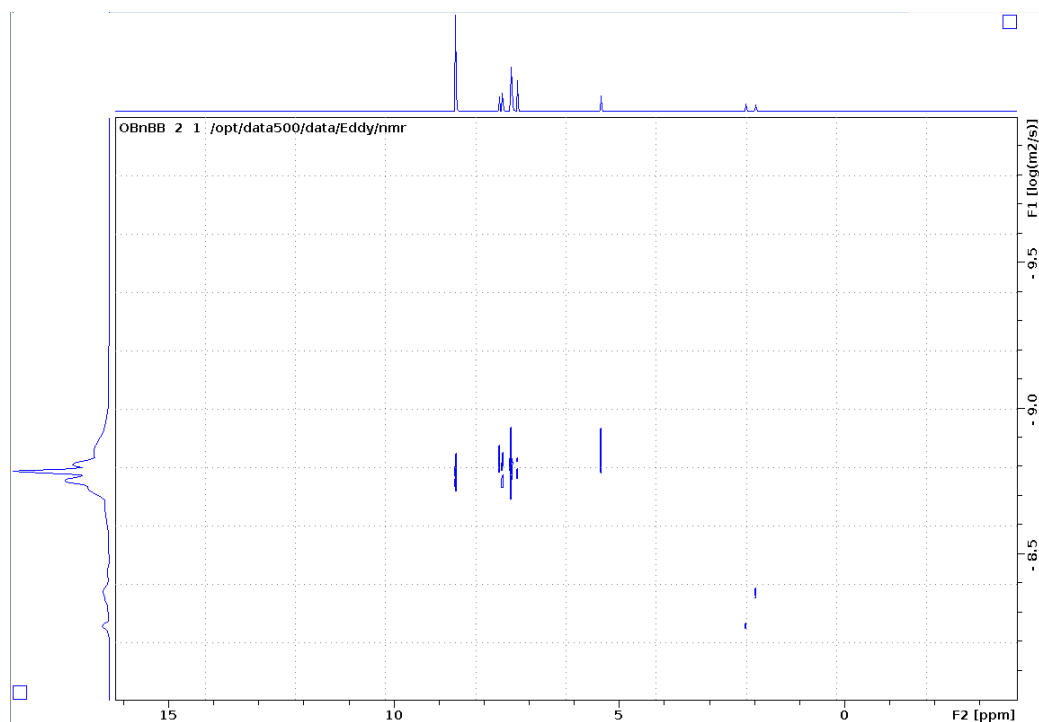

**Figure S5.** L<sup>OBn</sup> building block, DOSY NMR in MeCN-d<sub>3</sub> at 25°C.

### Synthesis of intermediate **I4**

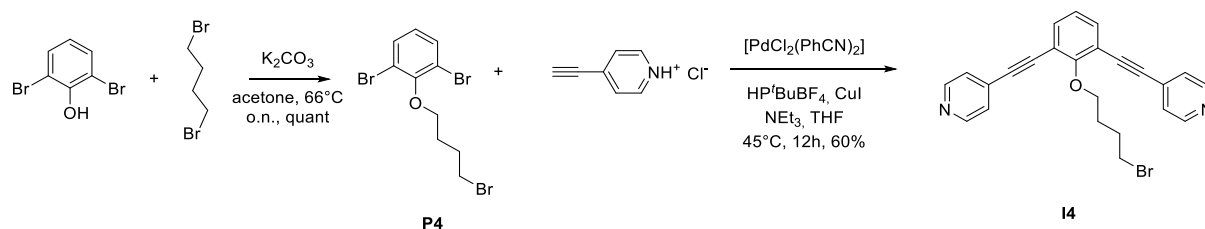

### Scheme S3. Synthetic route for intermediate **I4**.

**I4** was synthesized according to a slightly modified literature procedure.<sup>[4]</sup> Briefly, 2,6-dibromophenol (5g, 19.84 mmol, 1 eq.) was refluxed with 1,4-dibromobutane (85.7 g, 397 mmol, 20 eq.) and K<sub>2</sub>CO<sub>3</sub> (8.2 g, 60 mmol, 3 eq.) in 100 mL acetone overnight. Then, all volatiles were removed under reduced pressure at 90°C to afford the first intermediate **P4** in quantitative yield (7.65 g).

To a degassed solution of [Pd(PhCN)Cl<sub>2</sub>] (126 mg, 0.33 mmol, 0.08 eq.) and HP<sup>t</sup>BuBF<sub>4</sub> (190 mg, 0.66 mmol, 0.12 eq.) in 20 mL NEt<sub>3</sub> and 20 mL THF, **P4** (2.13 g, 5.5 mmol, 1 eq.) and 4-ethynylpyridine hydrochloride (2 g, 14.38 mmol, 2.5 eq.) were added. The mixture was heated to 45°C and CuI (42 mg, 0.22 mmol, 0.04 eq.) was added. After stirring the mixture at 45°C overnight, the solution was poured into 400 mL EtOAc and filtered over a pad of sand. The volatiles were removed under reduced pressure and the obtained crude material was purified by column chromatography (SiO<sub>2</sub>, MeOH:DCM, 1:99 → 4:96) to afford **I4** as a colorless oil (1.4 g, 60%). <sup>1</sup>H NMR (400 MHz, Chloroform-*d*) δ 8.73 – 8.63

(m, 4H), 7.60 (d,  $J = 7.7$  Hz, 2H), 7.56 – 7.49 (m, 4H), 7.18 (t,  $J = 7.7$  Hz, 1H), 4.39 (t,  $J = 6.0$  Hz, 2H), 3.51 (t,  $J = 6.7$  Hz, 2H), 2.31 – 2.21 (m, 2H), 2.14 – 2.00 (m, 2H).

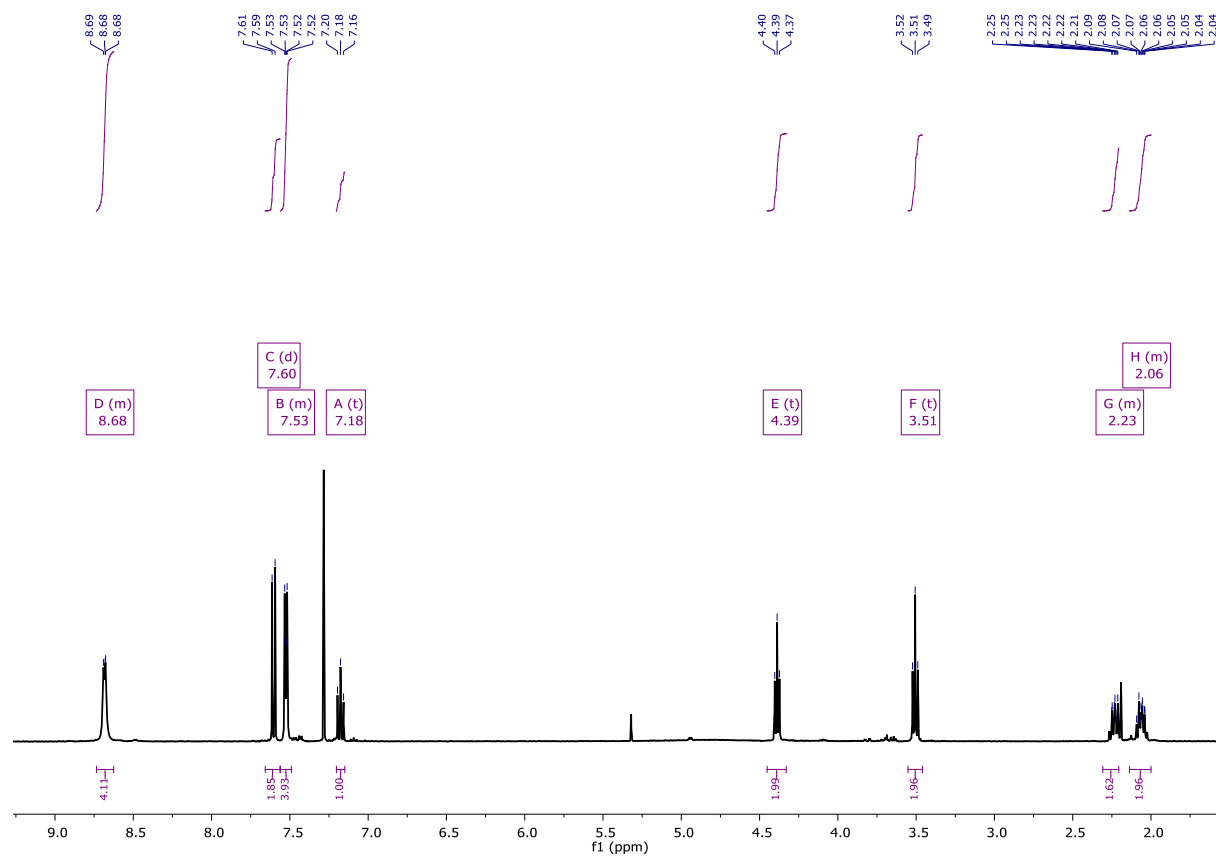

**Figure S6. I4** precursor,  $^1\text{H}$  NMR in  $\text{MeCN-d}_3$ .

## Synthesis of **L<sup>Imi</sup>**, **L<sup>Py</sup>**, **L<sup>Cou</sup>** and **L<sup>ImiAd</sup>**.

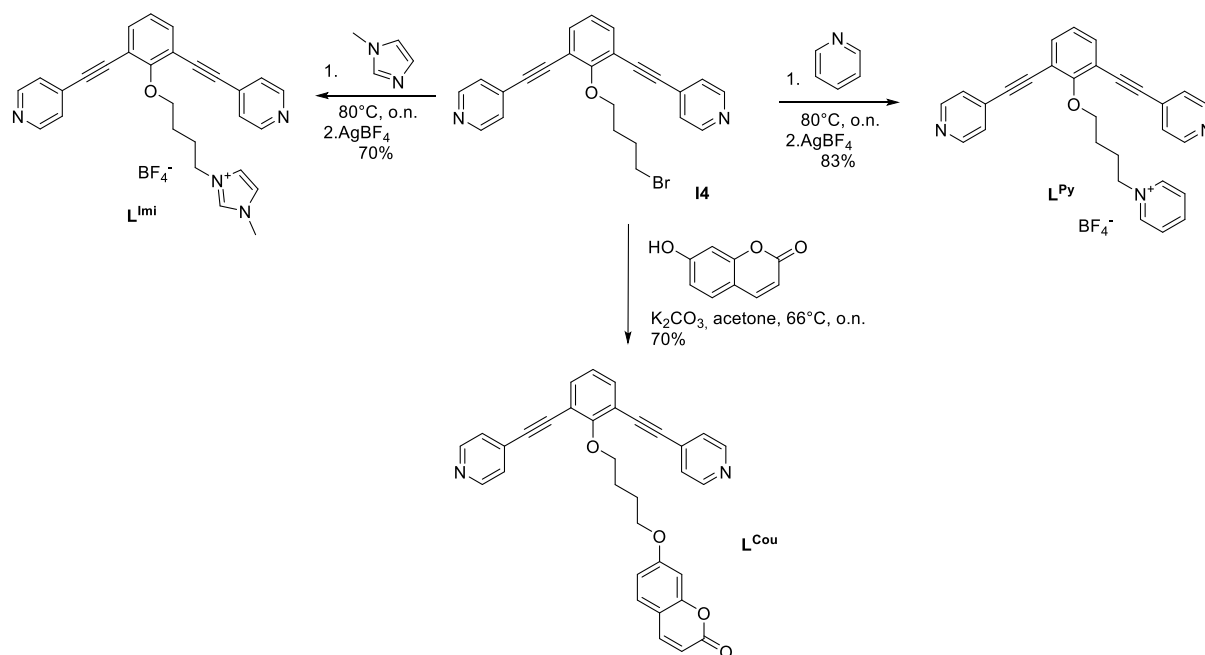

**Scheme S4.** Synthetic route for intermediate C4-linked building blocks **L<sup>Imi</sup>**, **L<sup>Py</sup>** and **L<sup>Cou</sup>**.

**L<sup>Imi</sup>**: To a solution of **I4** (0.7 g, 1.8 mmol, 1 eq.) in 10 mL MeCN, 1-methylimidazole (0.2 mL, 2.5 mmol, 1.5 eq.) was added. The mixture was heated at 90°C for 24 h. The solvent was removed under reduced pressure. The resulting oil was dissolved in a minimum amount of DCM and precipitated in 1L Et<sub>2</sub>O to afford **C4IMIBr**. To a solution of **C4IMIBr** (100 mg, 0.19 mmol, 1 eq.) in 3 mL DCM and 3 mL MeCN, AgBF<sub>4</sub> (38 mg, 0.19 mmol, 1 eq.) were added in the dark. The suspension was stirred over night at room temperature. The solvent was removed under reduced pressure. The residue was dissolved in 5 mL DCM and filtered over a pad of celite. The volatiles were removed under reduced pressure to afford of **L<sup>Imi</sup>** (71 mg, 0.13 mmol, 70%) as a bright beige oil. <sup>1</sup>H NMR (400 MHz, Acetonitrile-*d*<sub>3</sub>) δ 8.65 – 8.62 (m, 4H), 8.38 (d, *J* = 1.7 Hz, 1H), 7.66 (d, *J* = 7.7 Hz, 2H), 7.48 – 7.42 (m, 4H), 7.31 (dt, *J* = 15.6, 1.9 Hz, 2H), 7.25 (t, *J* = 7.7 Hz, 1H), 4.38 (t, *J* = 5.9 Hz, 2H), 4.23 (t, *J* = 7.4 Hz, 2H), 3.79 (s, 3H), 2.17 (tt, *J* = 8.4, 6.9 Hz, 2H), 1.94 – 1.86 (m, 2H). <sup>13</sup>C NMR (101 MHz, CD<sub>3</sub>CN) δ 161.13, 150.08, 135.86, 134.91, 130.49, 125.23, 124.42, 123.69, 122.19, 116.75, 90.99, 89.02, 73.90, 54.35, 49.29, 35.85, 27.07, 26.62. <sup>19</sup>F NMR (282 MHz, CDCl<sub>3</sub>) δ -147.43, -147.49. LogD(m<sup>2</sup>/s) at 25°C (MeCN-*d*<sub>3</sub>): -9.011 (*d* = 1.30 nm). HR-ESI-MS, calculated for C<sub>28</sub>H<sub>25</sub>N<sub>4</sub>O 433.2023, obtained 433.1999.

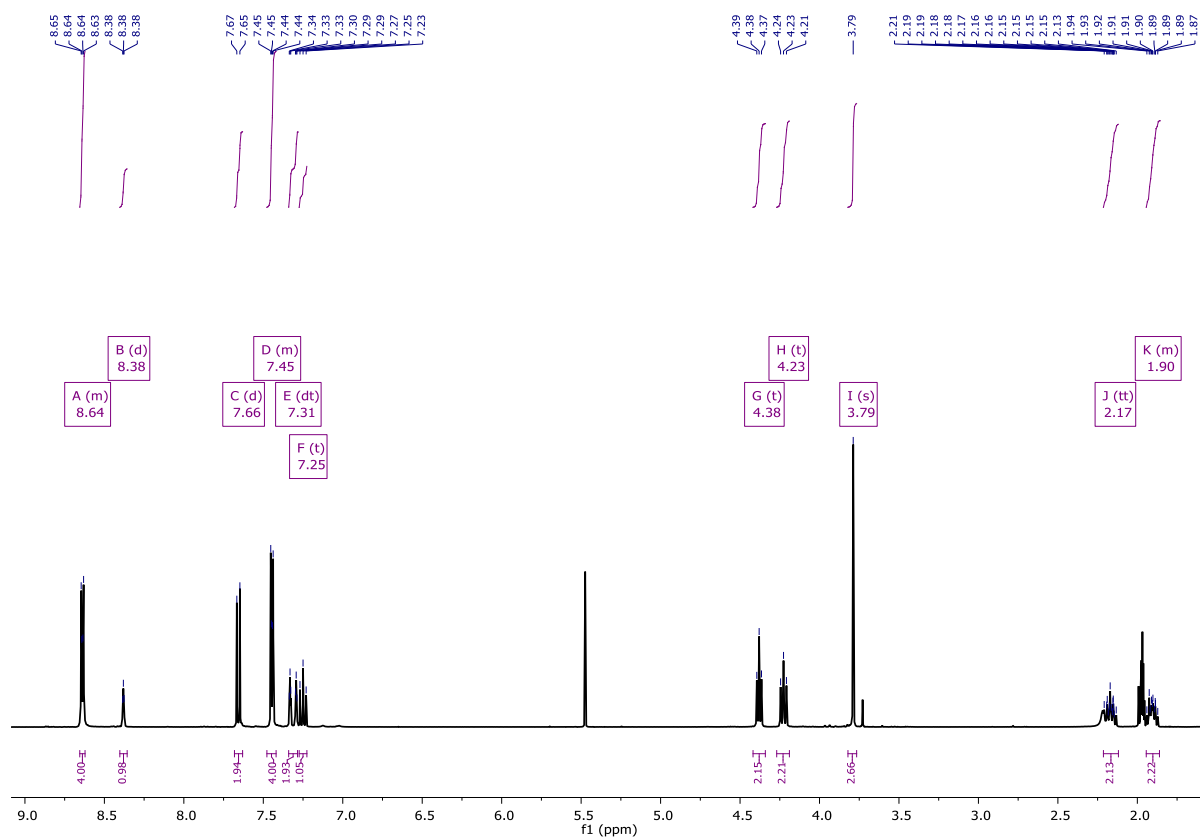

Figure S7.  $L^{Imi}$  building block,  $^1H$  NMR in  $MeCN-d_3$ .

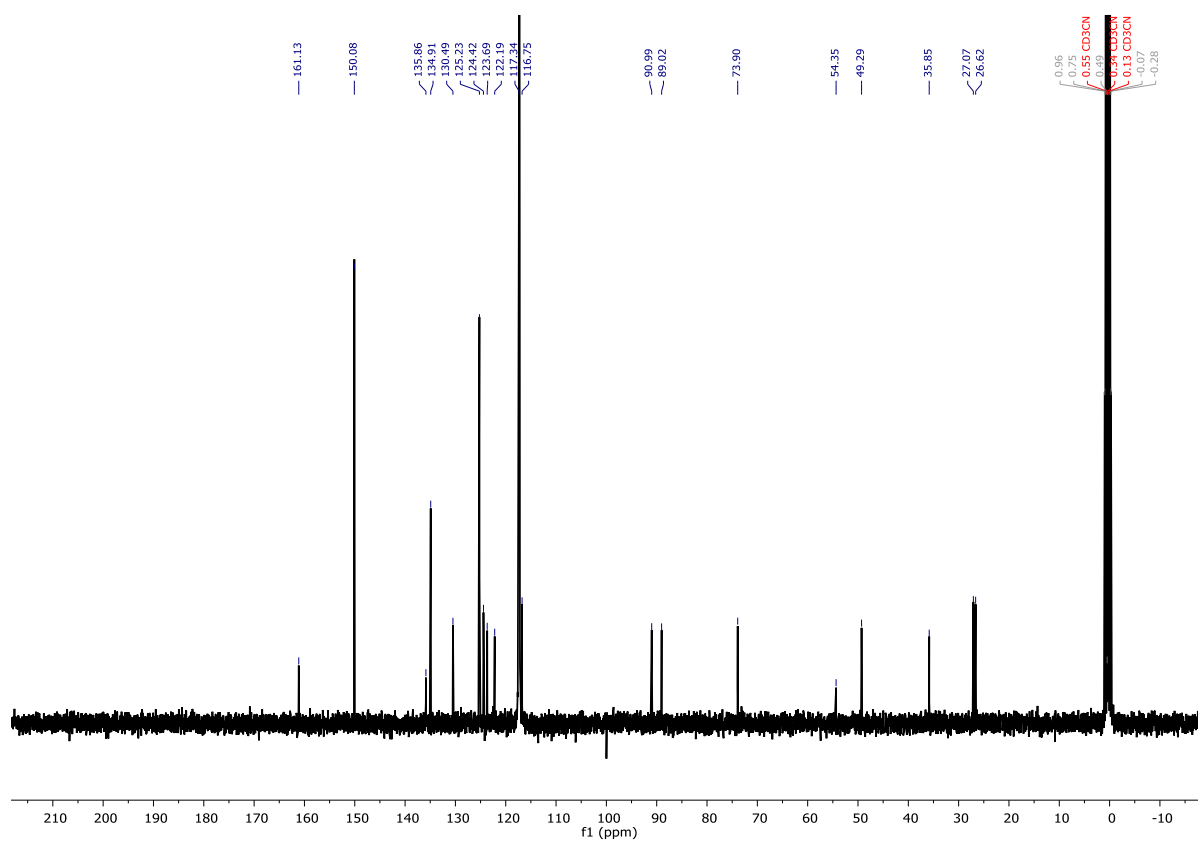

Figure S8.  $L^{Imi}$  building block,  $^{13}C$  NMR in  $MeCN-d_3$ .

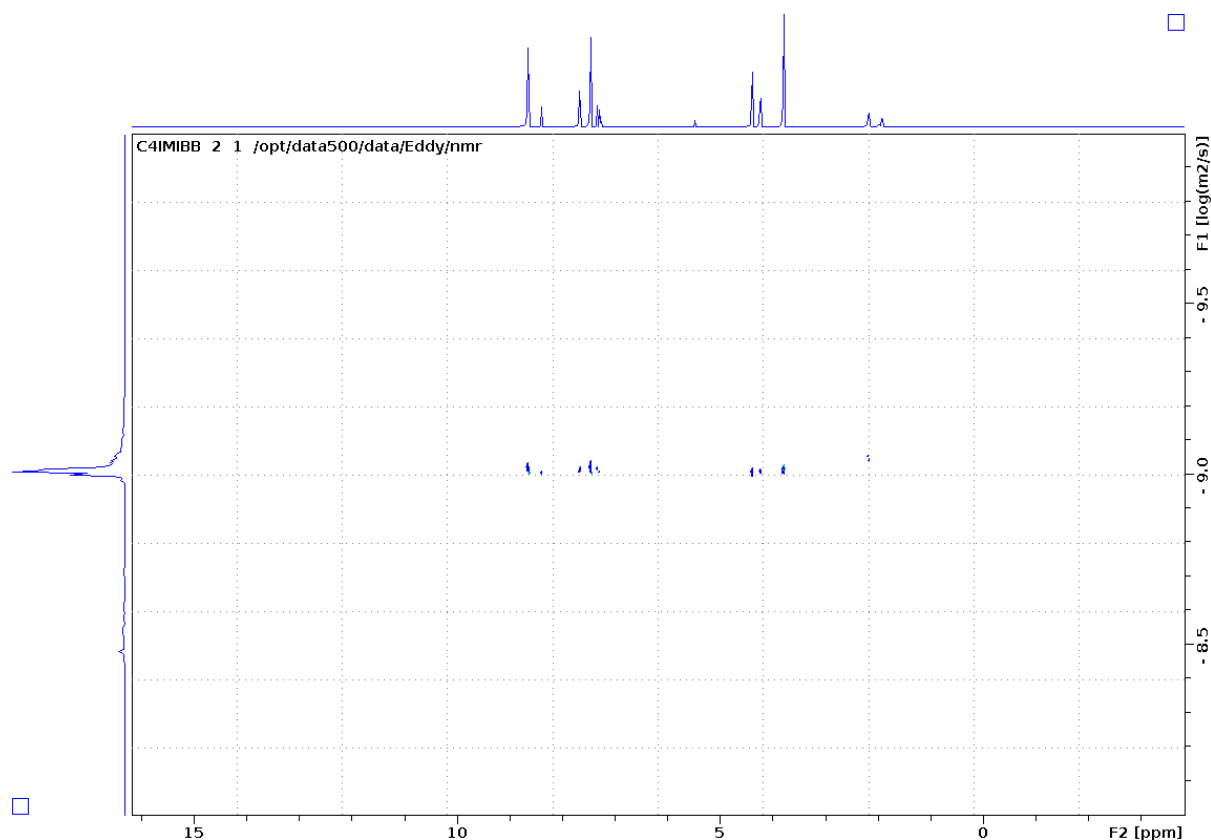

**Figure S9.**  $L^{mi}$  building block, DOSY in  $MeCN-d_3$  at  $25^\circ C$ .

**$L^{Py}$ :** To a solution of **I4** (0.7 g, 1.8 mmol, 1 eq.) in 10 mL  $MeCN$ , 10 mL pyridine was added. The mixture was heated at  $90^\circ C$  for 24 h. The solvent was removed under reduced pressure. The resulting oil was dissolved in a minimum amount of  $DCM$  and precipitated in 1L  $Et_2O$  to afford **C4PyBr**. To a solution of **C4PyBr** (100 mg, 0.19 mmol, 1 eq.) in 3 mL  $DCM$  and 3 mL  $MeCN$ ,  $AgBF_4$  (38 mg, 0.19 mmol, 1 eq.) was added in the dark. The suspension was stirred over night at room temperature. The solvent was removed under reduced pressure. The residue was dissolved in 5 mL  $DCM$  and filtered over a pad of celite. The volatiles were removed under reduced pressure to afford  **$L^{Py}$**  (84 mg, 0.16 mmol, 83 %) as a bright brown oil.  $^1H$  NMR (400 MHz,  $Acetonitrile-d_3$ )  $\delta$  8.76 – 8.72 (m, 2H), 8.63 – 8.61 (m, 4H), 8.46 (tt,  $J = 7.8, 1.4$  Hz, 1H), 7.96 (t,  $J = 7.1$  Hz, 2H), 7.65 (d,  $J = 7.8$  Hz, 2H), 7.46 – 7.41 (m, 4H), 7.25 (t,  $J = 7.7$  Hz, 1H), 4.71 – 4.62 (m, 2H), 4.39 (t,  $J = 5.9$  Hz, 2H), 2.32 (tt,  $J = 9.3, 6.9$  Hz, 2H).  $^{13}C$  NMR (101 MHz,  $CD_3CN$ )  $\delta$  161.00, 150.09, 145.76, 144.40, 134.90, 130.43, 128.34, 125.22, 124.47, 116.75, 91.01, 88.97, 73.79, 61.41, 28.38, 26.47.  $LogD(m^2/s)$  at  $25^\circ C$  ( $MeCN-d_3$ ): -8.946 ( $d = 1.12$  nm). HR-ESI-MS, calculated for  $C_{29}H_{24}N_3O$  430.1913, obtained 430.1876.

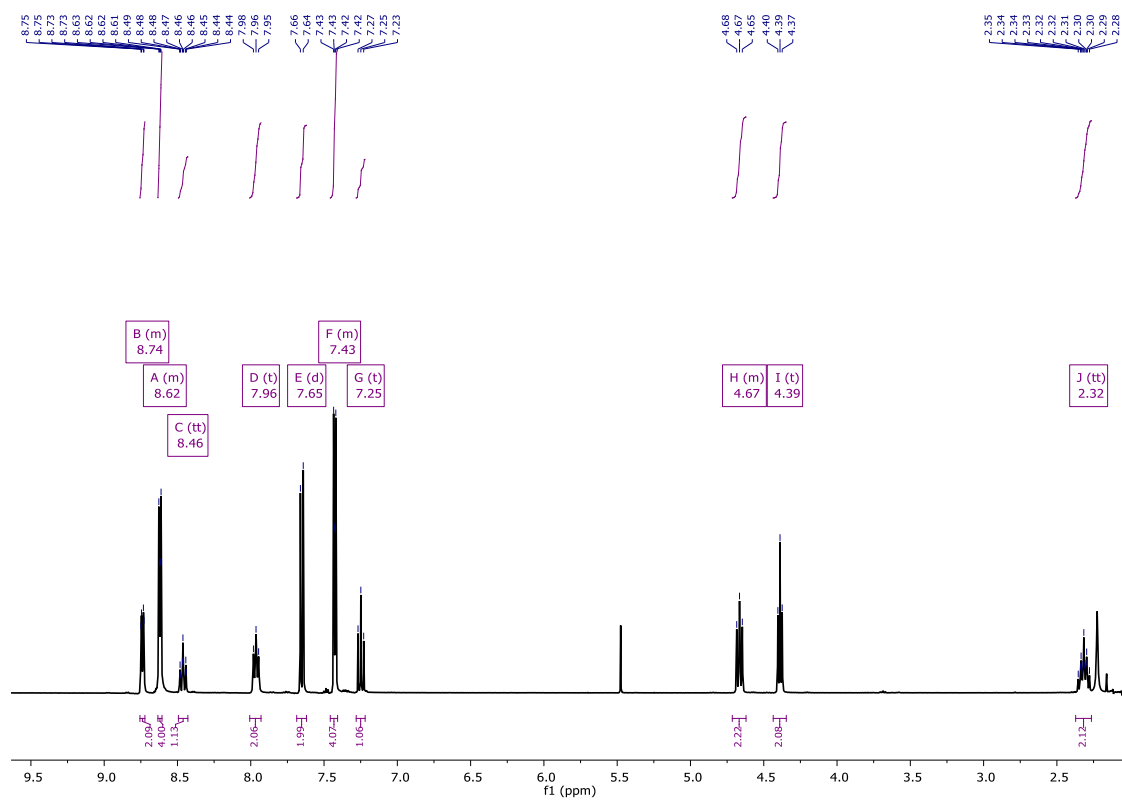

Figure S10.  $L^{Py}$  building block,  $^1H$  NMR in  $MeCN-d_3$ .

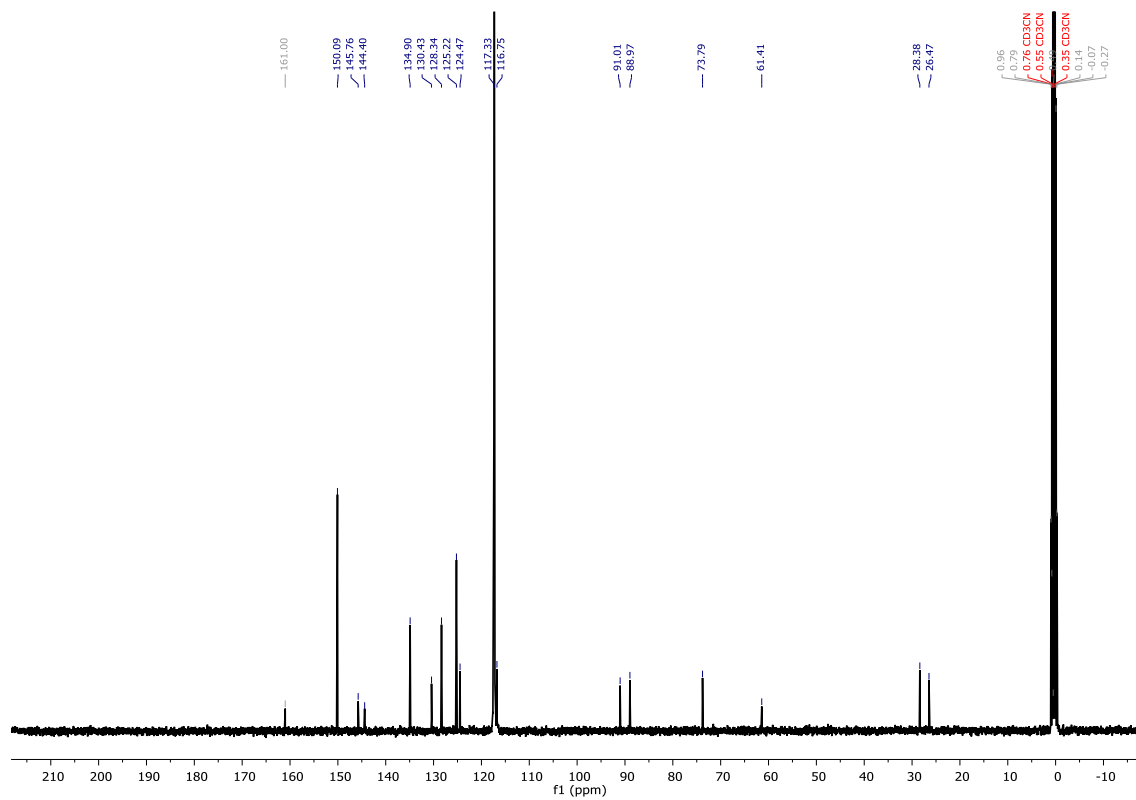

Figure S11.  $L^{Py}$  building block,  $^{13}C$  NMR in  $MeCN-d_3$ .



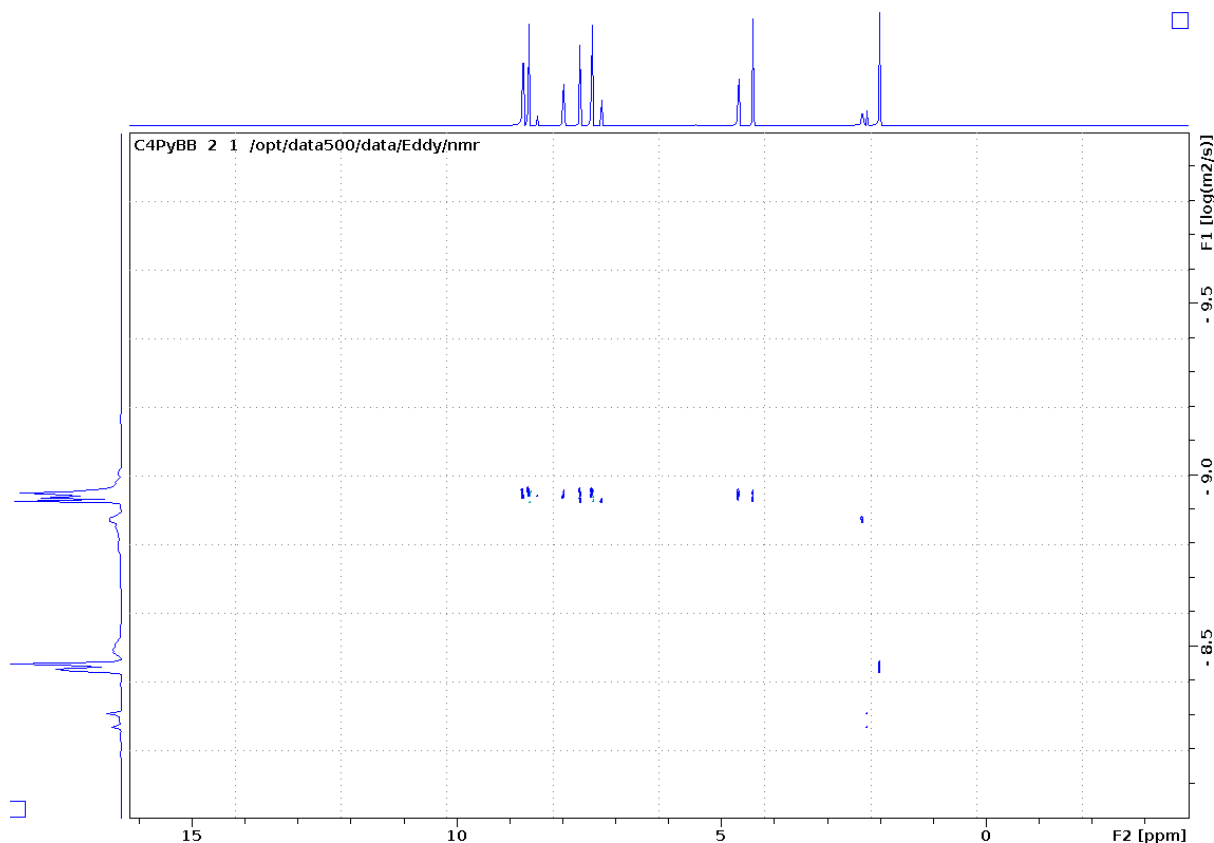

**Figure S12.**  $L^{Py}$  building block, DOSY in  $MeCN-d_3$  at  $25^\circ C$ .

**$L^{Cou}$ :** To a solution of **I4** (0.2 g, 0.46 mmol, 1 eq.) in 30 mL acetone, umbelliferone (83 mg, 0.51 mmol, 1.1 eq.) and  $K_2CO_3$  (0.19 g, 1.4 mmol, 3 eq.) were added. The mixture was heated to reflux for 24 h. The solvent was removed under reduced pressure. The resulting solid was dissolved in 100 mL water and 100 mL DCM. The organic phase was separated and washed with 3x100 mL 1N NaOH. The organic phase was dried with  $NaSO_4$  and the volatiles were removed under reduced pressure to afford  **$L^{Cou}$**  (165 mg, 0.32 mmol, 70 %) as a white solid.  $^1H$  NMR (400 MHz, Acetonitrile- $d_3$ )  $\delta$  8.63 – 8.54 (m, 4H), 7.79 (d,  $J = 9.5$  Hz, 1H), 7.65 (d,  $J = 7.7$  Hz, 2H), 7.49 – 7.42 (m, 5H), 7.23 (t,  $J = 7.7$  Hz, 1H), 6.85 – 6.76 (m, 2H), 6.21 (d,  $J = 9.5$  Hz, 1H), 4.45 (t,  $J = 5.9$  Hz, 2H), 4.15 (t,  $J = 6.3$  Hz, 2H), 2.16 – 2.03 (m, 4H).  $^{13}C$  NMR (101 MHz,  $CD_3CN$ )  $\delta$  162.11, 161.49, 160.73, 155.86, 149.99, 143.75, 134.89, 130.51, 129.19, 125.19, 124.13, 116.71, 112.67, 101.15, 89.14, 74.41, 68.34, 26.75, 25.69.  $\log D(m^2/s)$  at  $25^\circ C$  ( $MeCN-d_3$ ): -8.881 ( $d = 0.96$  nm). HR-ESI-MS, calculated for  $[C_{33}H_{24}N_2O_4]H^+$  513.1809, obtained 513.1788.

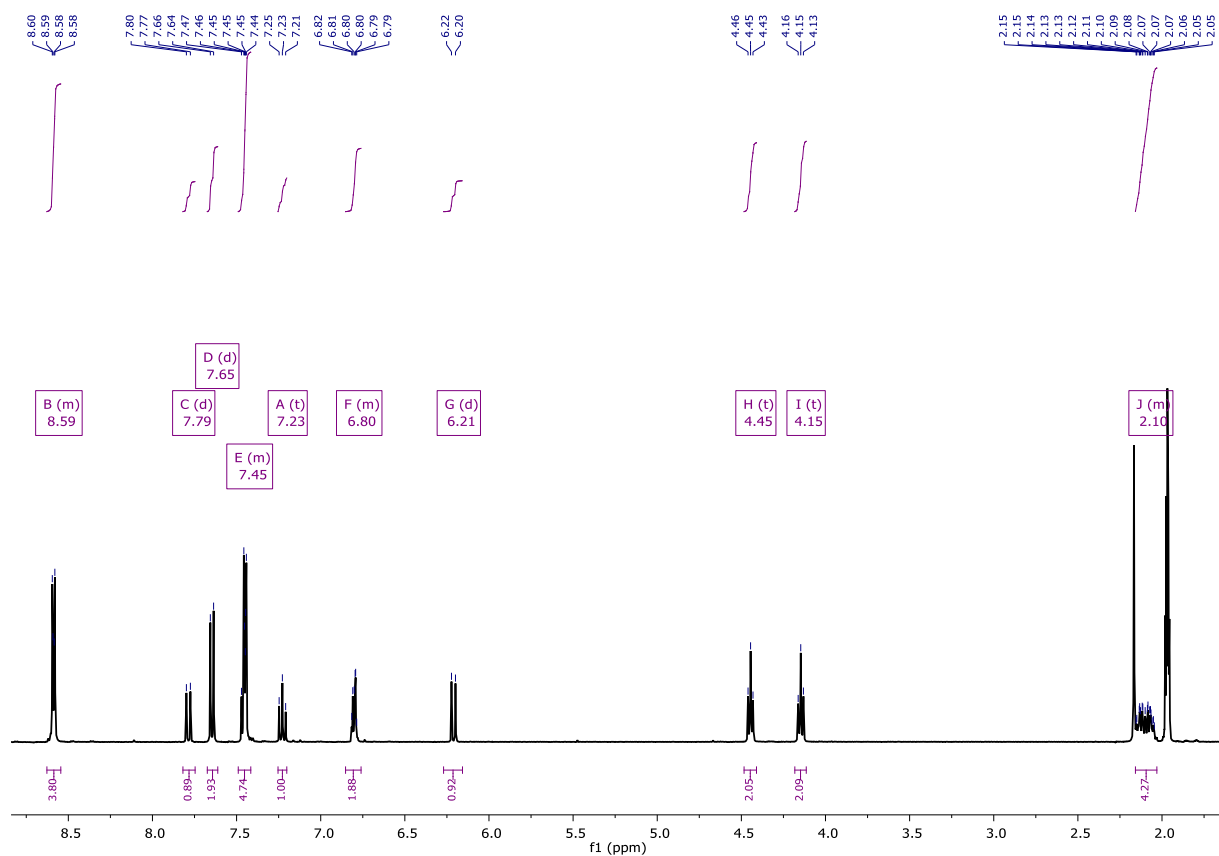

**Figure S13.  $L^{C^{ou}}$  building block,  $^1H$  NMR in  $MeCN-d_3$ .**

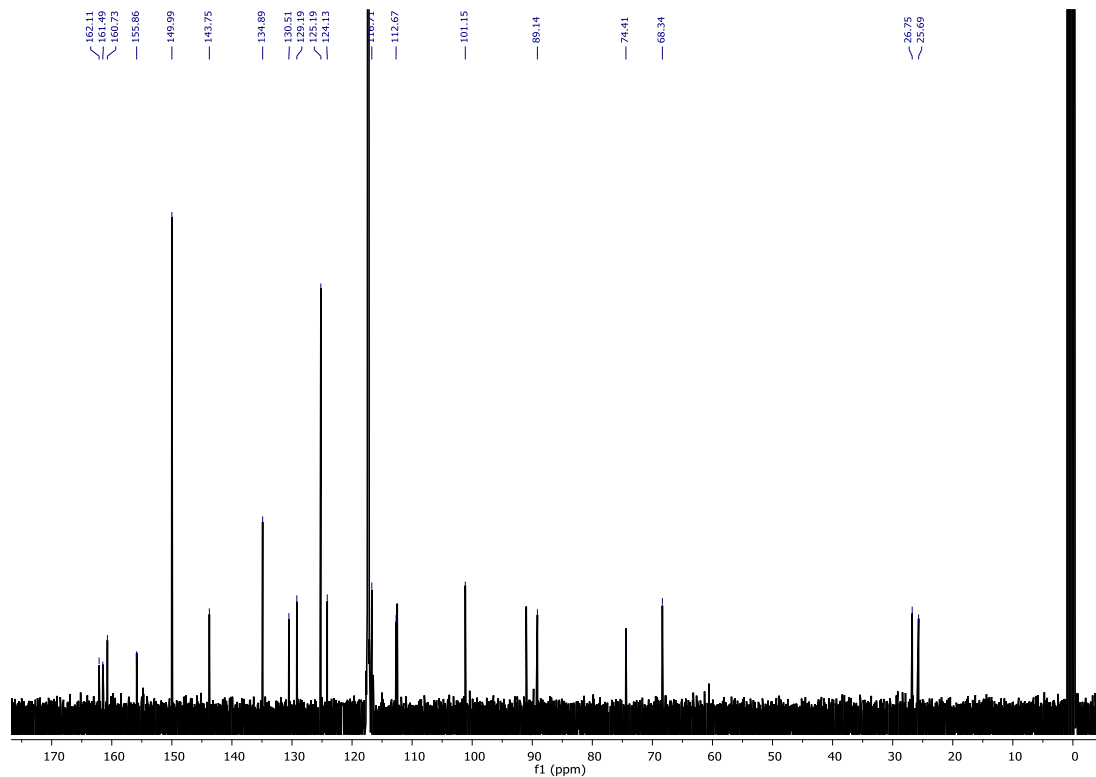

**Figure S14.  $L^{C^{ou}}$  building block,  $^{13}C$  NMR in  $MeCN-d_3$ .**

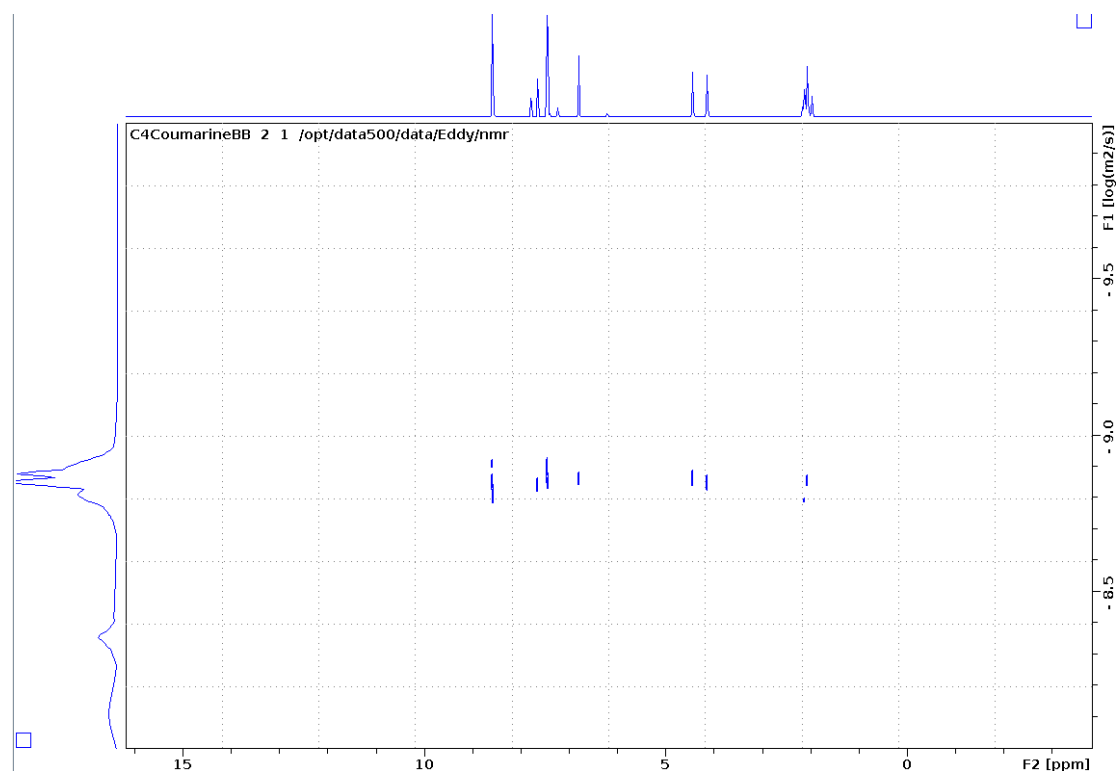

**Figure S15.**  $L^{Cou}$  building block, DOSY in  $MeCN-d_3$  at  $25^\circ C$ .

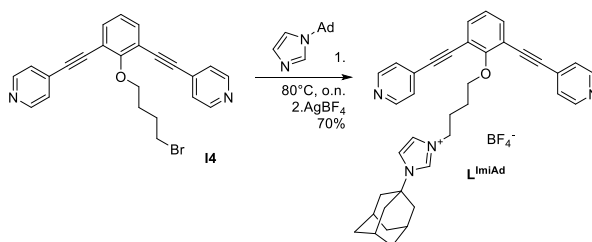

**Scheme S5.** Synthetic route for intermediate C4-linked building blocks  $L^{ImiAd}$ .

**$L^{ImiAd}$ :** To a solution of **I4** (0.7 g, 1.8 mmol, 1 eq.) in 10 mL MeCN, 1-adamantylimidazole (0.5 mg, 2.5 mmol, 1.5 eq.) was added. The mixture was heated at  $90^\circ C$  for 24 h. The solvent was removed under reduced pressure. The resulting oil was dissolved in a minimum amount of DCM and precipitated in 1L  $Et_2O$  to afford **C4IMIAdBr**. To a solution of **C4IMIAdBr** (200 mg, 0.31 mmol, 1 eq.) in 3 mL DCM and 3 mL MeCN,  $AgBF_4$  (61 mg, 0.31 mmol, 1 eq.) were added in the dark. The suspension was stirred over night at room temperature. The solvent was removed under reduced pressure. The residue was dissolved in 5 mL DCM and filtered over a pad of celite. The volatiles were removed under reduced pressure to afford of  **$L^{ImiAd}$**  (142 mg, 0.22 mmol, 70%) as a bright beige oil.  $^1H$  NMR (300 MHz, Acetonitrile- $d_3$ )  $\delta$  8.97 (s, 1H), 8.71 – 8.56 (m, 5H), 7.66 (dd,  $J = 7.8, 2.5$  Hz, 2H), 7.55 (t,  $J = 2.0$  Hz, 1H), 7.52 – 7.38 (m, 6H), 7.25 (dd,  $J = 9.0, 6.4$  Hz, 1H), 4.35 (dt,  $J = 22.6, 6.5$  Hz, 5H), 1.85 – 1.63 (m, 9H), other adamantane and  $CH_2$  signals are located below solvent and water signal.  $^{13}C$  NMR (101 MHz,  $CD_3CN$ )  $\delta$  150.10, 134.91, 130.45, 125.26, 124.42, 122.25, 119.01, 116.76, 91.01, 89.00, 73.98, 49.33, 41.97, 34.89, 29.42, 26.95, 26.68. ESI-MS, calculated for  $C_{37}H_{37}N_4O$  553.2962, obtained 553.2989.

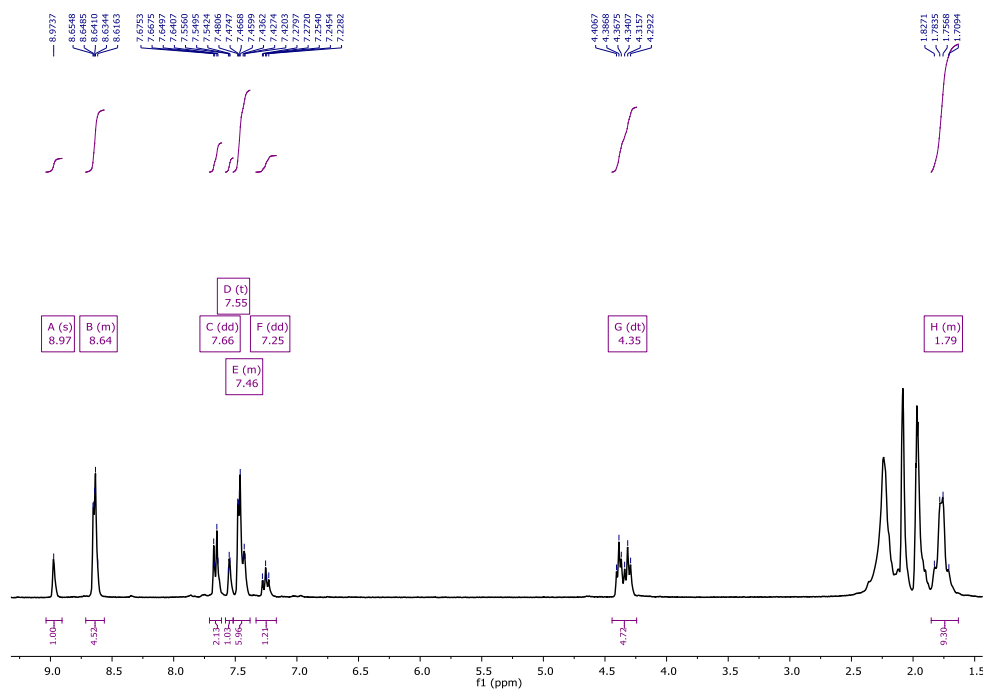

Figure S16. LImiAd building block, <sup>1</sup>H NMR in MeCN-d<sub>3</sub>.

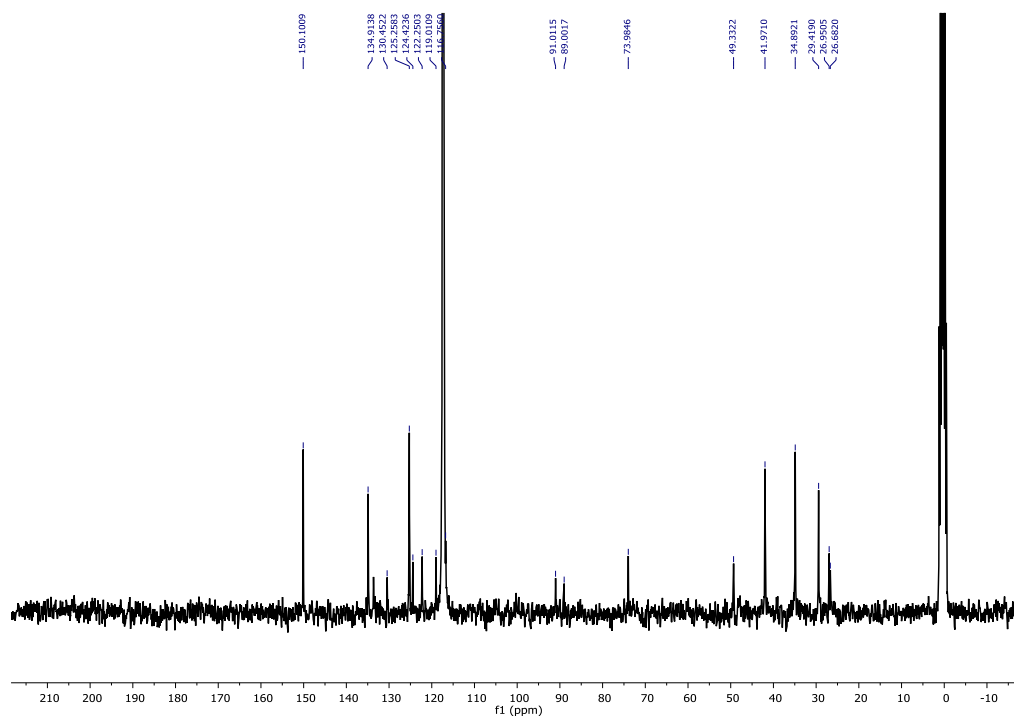

Figure S17. LImiAd building block, <sup>13</sup>C NMR in MeCN-d<sub>3</sub>.

## Synthesis of **L<sup>P0</sup>**

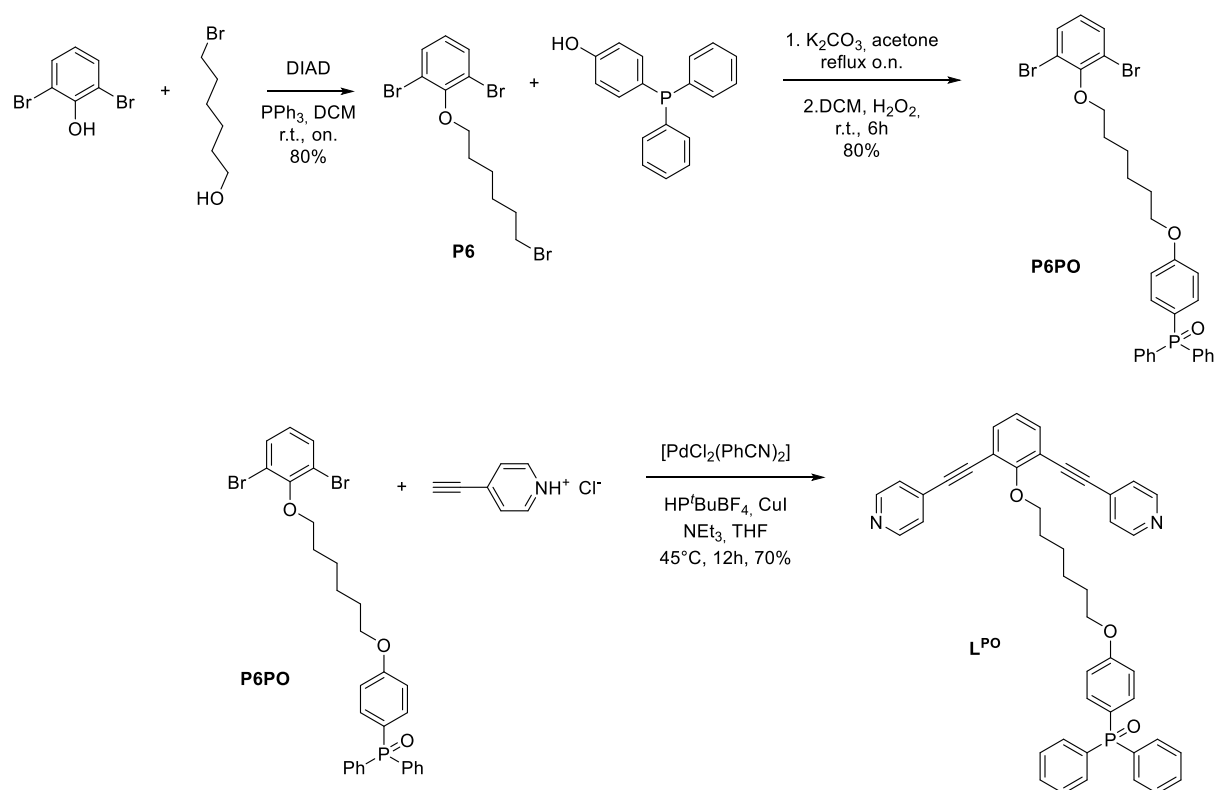

**Scheme S6.** Synthetic route for the C6-linked building block **L<sup>P0</sup>**.

### Synthesis of intermediate **P6**

The material was synthesized according to an adopted literature procedure<sup>[5]</sup>, but instead of using 4-methoxyphenol, 2,6-dibromophenol was used as starting material. To a solution of 2,6-dibromophenol (1.1g, 4.36 mmol, 1eq.), 6-bromo-hexa-1-ol (0.79 g, 4.36 mmol, 1 eq.) and PPh<sub>3</sub> (1.14 g, 4.36 mmol, 1 eq.) in 10 mL dry THF, DIAD (1 mL, 0.97g, 4.8 mmol, 1.1 eq.) was added dropwise at 0°C. The solution was let to heat up to room temperature and stirred overnight. The volatiles were removed under reduced pressure. The crude material was purified by column chromatography (SiO<sub>2</sub>, hexane : ethyl acetate, 99:1 to 90:10) to afford 1.4 g (3.5 mmol, 80%) of **P6** as a colorless oil. <sup>1</sup>H NMR (300 MHz, Chloroform-*d*) δ 7.52 (d, *J* = 8.0 Hz, 2H), 6.87 (t, *J* = 8.0 Hz, 1H), 4.04 (t, *J* = 6.4 Hz, 2H), 3.47 (t, *J* = 6.8 Hz, 2H), 2.02 – 1.82 (m, 5H), 1.70 – 1.49 (m, 5H). <sup>13</sup>C NMR (75 MHz, CDCl<sub>3</sub>) δ 153.45, 132.72, 126.14, 118.55, 73.15, 33.91, 32.78, 29.86, 28.00, 25.15.

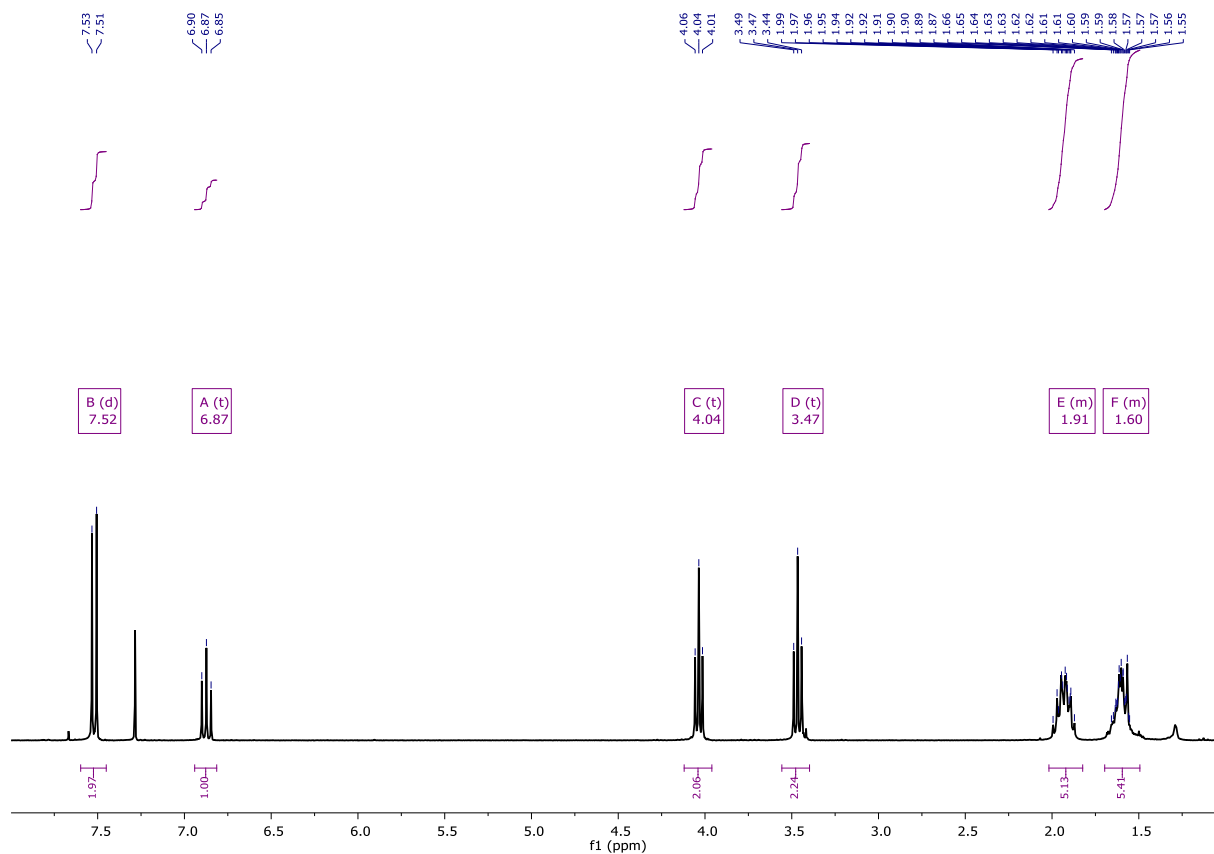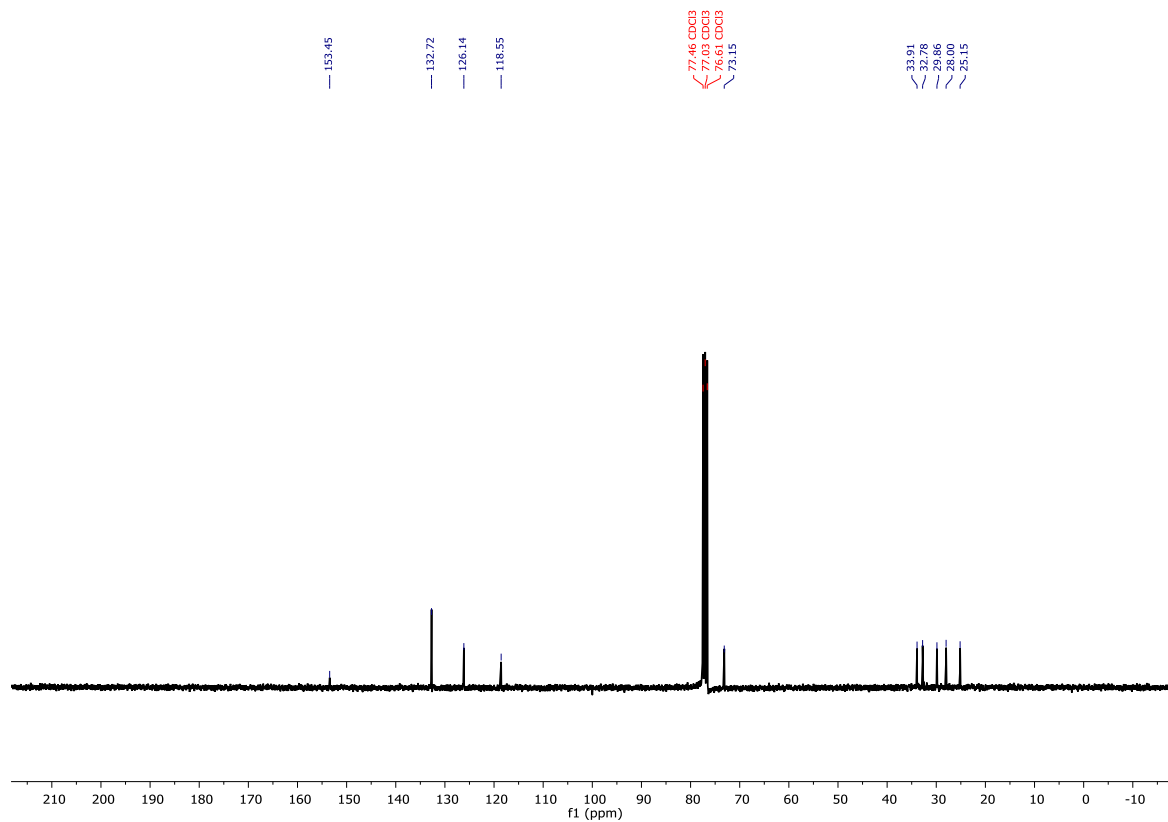

## Synthesis of intermediate **P6PO**

To a solution of **P6** (680 mg, 1.64 mmol, 1 eq.) in 50 mL acetone, 4-(diphenylphosphaneyl)phenol (510 mg, 1.8 mmol, 1.1 eq.) and  $K_2CO_3$  (700 mg, 5 mmol, 3 eq.) were added. The solution was refluxed overnight. After evaporation of the solvent, the crude material was taken up into 100 mL DCM. The organic phase was washed with  $NaOH_{aq}$  (1M) (5x50 mL). The organic phase was separated and the solvent evaporated. The crude material was used for the next step without any further purification. To a solution of **P6P** in 60 mL DCM, 30 mL of  $H_2O_2$  (35% in water) was added. The solution was stirred for 6h at room temperature. Afterwards, the organic phase was separated, dried with  $Na_2SO_4$  and the volatiles removed under reduced pressure to afford **P6PO** (920 mg, 91%) as a slowly crystallizing colorless oil.  $^1H$  NMR (400 MHz, Chloroform-*d*)  $\delta$  7.72 – 7.65 (m, 4H), 7.62 – 7.53 (m, 3H), 7.51 (d,  $J = 8.0$  Hz, 2H), 7.49 – 7.44 (m, 3H), 6.98 (dd,  $J = 8.9, 2.3$  Hz, 2H), 6.87 (t,  $J = 8.0$  Hz, 1H), 4.04 (td,  $J = 6.5, 2.3$  Hz, 4H), 1.99 – 1.80 (m, 5H), 1.73 – 1.53 (m, 7H).  $^{13}C$  NMR (101 MHz,  $CDCl_3$ )  $\delta$  134.06, 133.95, 132.71, 132.15, 132.05, 131.88, 128.53, 128.41, 126.14, 118.55, 114.67, 114.54, 73.19, 68.00, 53.44, 29.93, 29.06, 25.85, 25.66.  $^{31}P$  NMR (162 MHz,  $CDCl_3$ )  $\delta$  29.78. HR-ESI-MS, calculated for  $C_{30}H_{29}Br_2O_3P+H^+$  629.0273, obtained 629.0355.

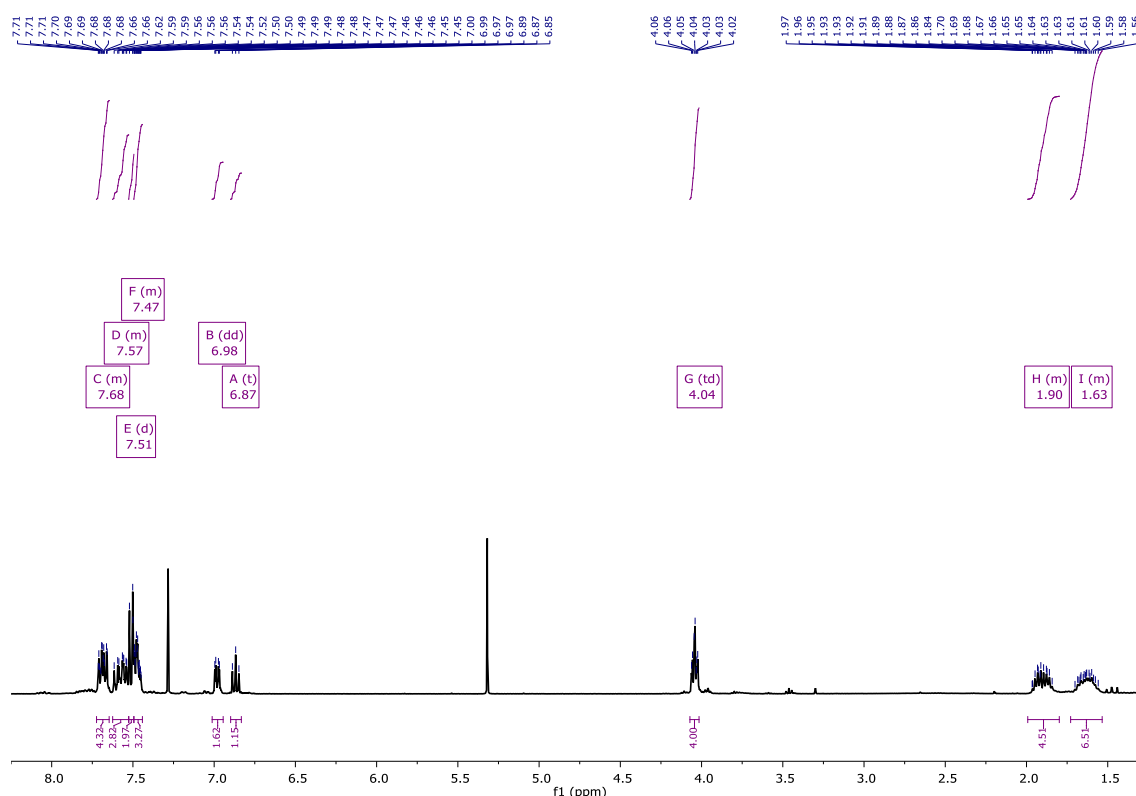

**Figure S20.** **P6PO** intermediate,  $^1H$  NMR in  $CDCl_3$ .

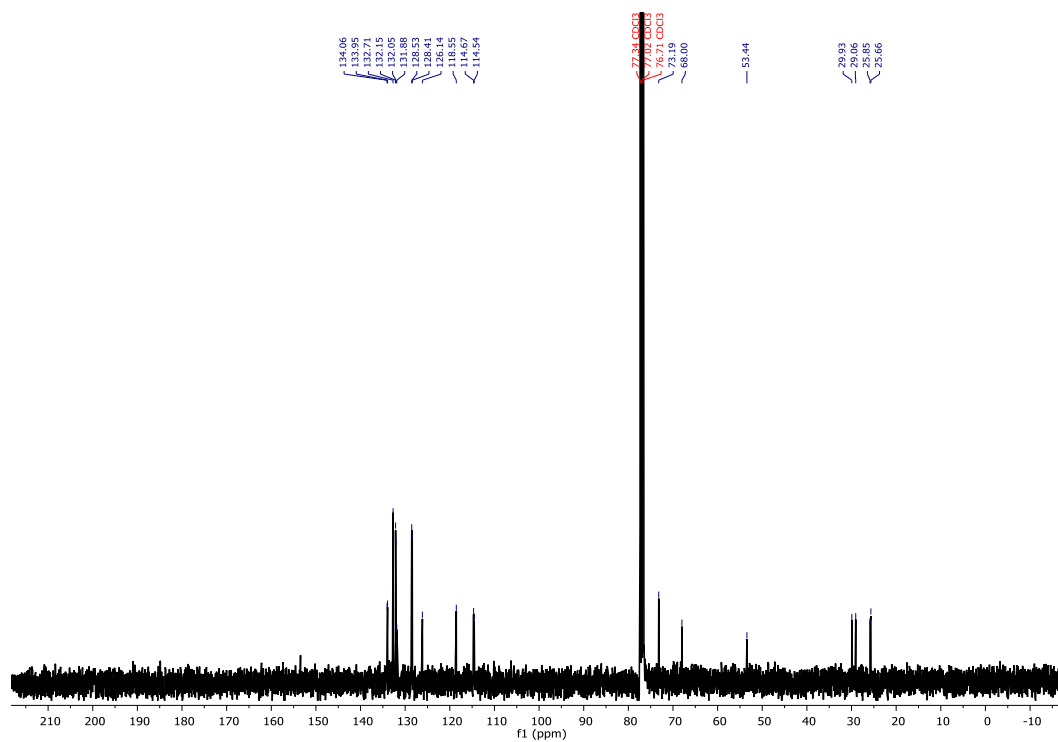

Figure S21. P6PO intermediate,  $^{13}\text{C}$  NMR in  $\text{CDCl}_3$ .

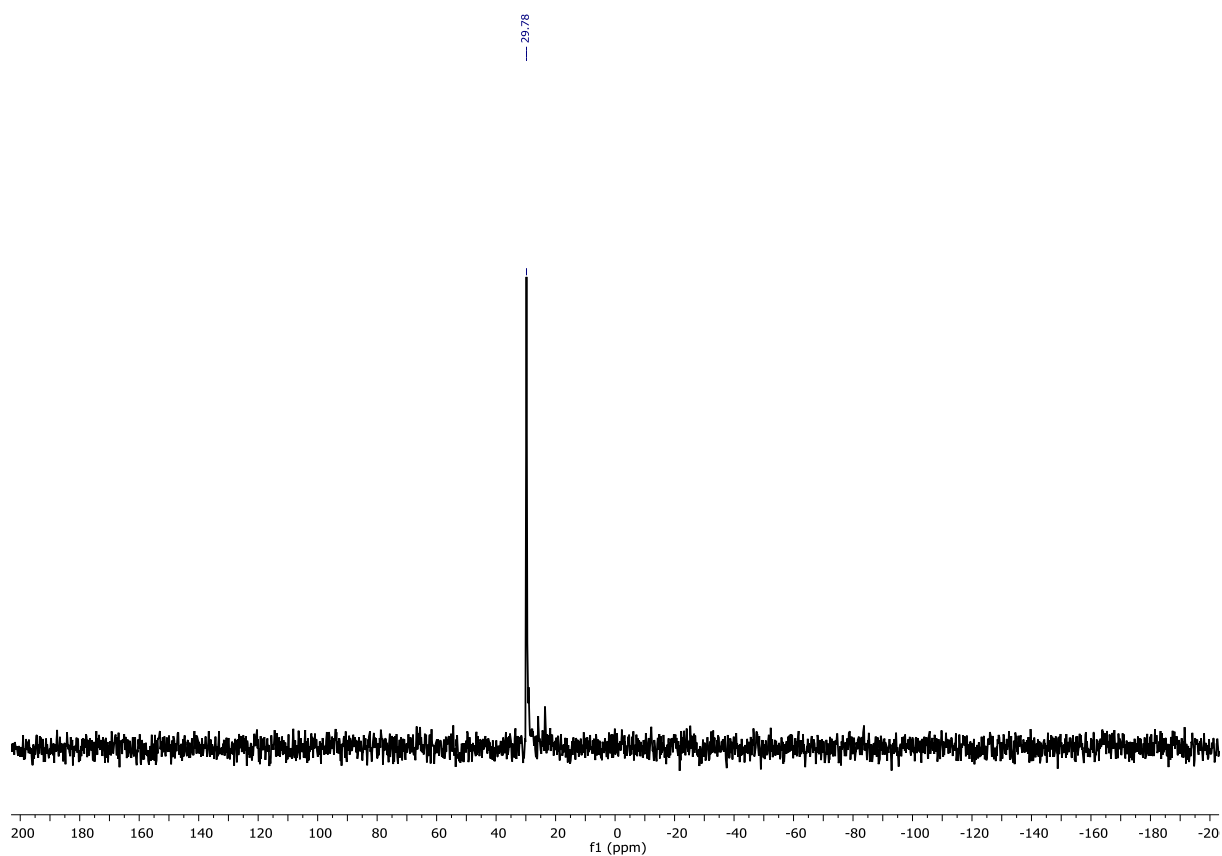

Figure S22. P6PO intermediate,  $^{31}\text{P}$  NMR in  $\text{CDCl}_3$ .



## Synthesis of L<sup>P0</sup>

HP<sup>t</sup>BuBF<sub>4</sub> (60 mg, 0.18 mmol, 0.12 eq.) and Pd(PhCN)<sub>2</sub>Cl<sub>2</sub> (40 mg, 0.09 mmol, 0.06 eq.) were dissolved in a mixture of degassed THF (20 mL) and trimethylamine (20 mL). The solution was stirred 20 min at room temperature before **P6PO** (0.92 g, 1.5 mmol, 1 eq.) and 4-ethynylpyridine hydrochloride (0.45 g, 3.73 mmol, 2.5 eq.) were added. The solution was gently heated up to 45 °C and copper(I) iodide (11 mg, 0.06 mmol, 0.04 eq.) was added. This mixture was stirred at 45 °C for 24 h under nitrogen atmosphere. The reaction mixture was poured into 400 mL ethylacetate, filtrated over a pad of sand and evaporated in *vacuo*. The crude product was purified by column chromatography on silica gel (DCM/MeOH = 99/1) to give **L<sup>P0</sup>** as a slowly crystalizing colorless oil. <sup>1</sup>H NMR (400 MHz, Acetonitrile-*d*<sub>3</sub>) δ 8.57 – 8.55 (m, 4H), 7.63 (ddd, *J* = 11.8, 8.3, 1.4 Hz, 4H), 7.60 – 7.54 (m, 4H), 7.53 – 7.46 (m, 6H), 7.42 – 7.38 (m, 4H), 7.13 (t, *J* = 7.7 Hz, 1H), 6.94 – 6.90 (m, 2H), 4.31 (t, *J* = 6.2 Hz, 2H), 3.89 (t, *J* = 6.5 Hz, 2H), 1.86 (dq, *J* = 8.1, 6.3 Hz, 2H), 1.73 – 1.63 (m, 2H), 1.63 – 1.55 (m, 2H), 1.52 – 1.45 (m, 1H). <sup>13</sup>C NMR (101 MHz, CD<sub>3</sub>CN) δ 161.99, 161.96, 161.68, 149.99, 134.82, 134.10, 133.63, 133.52, 133.07, 131.85, 131.82, 131.74, 131.69, 131.59, 130.58, 128.65, 128.59, 128.54, 128.47, 125.20, 124.28, 123.96, 123.19, 116.64, 114.67, 114.54, 90.96, 89.34, 74.75, 67.90, 30.14, 28.69, 26.63, 25.76, 25.50. <sup>31</sup>P NMR (162 MHz, CD<sub>3</sub>CN) δ 26.02. LogD(m<sup>2</sup>/s) at 25°C (MeCN-*d*<sub>3</sub>): -9.116 (d = 1.66 nm). HR-ESI-MS, calculated for C<sub>44</sub>H<sub>37</sub>N<sub>2</sub>O<sub>3</sub>P+H<sup>+</sup> 673.2615, obtained 673.2632.

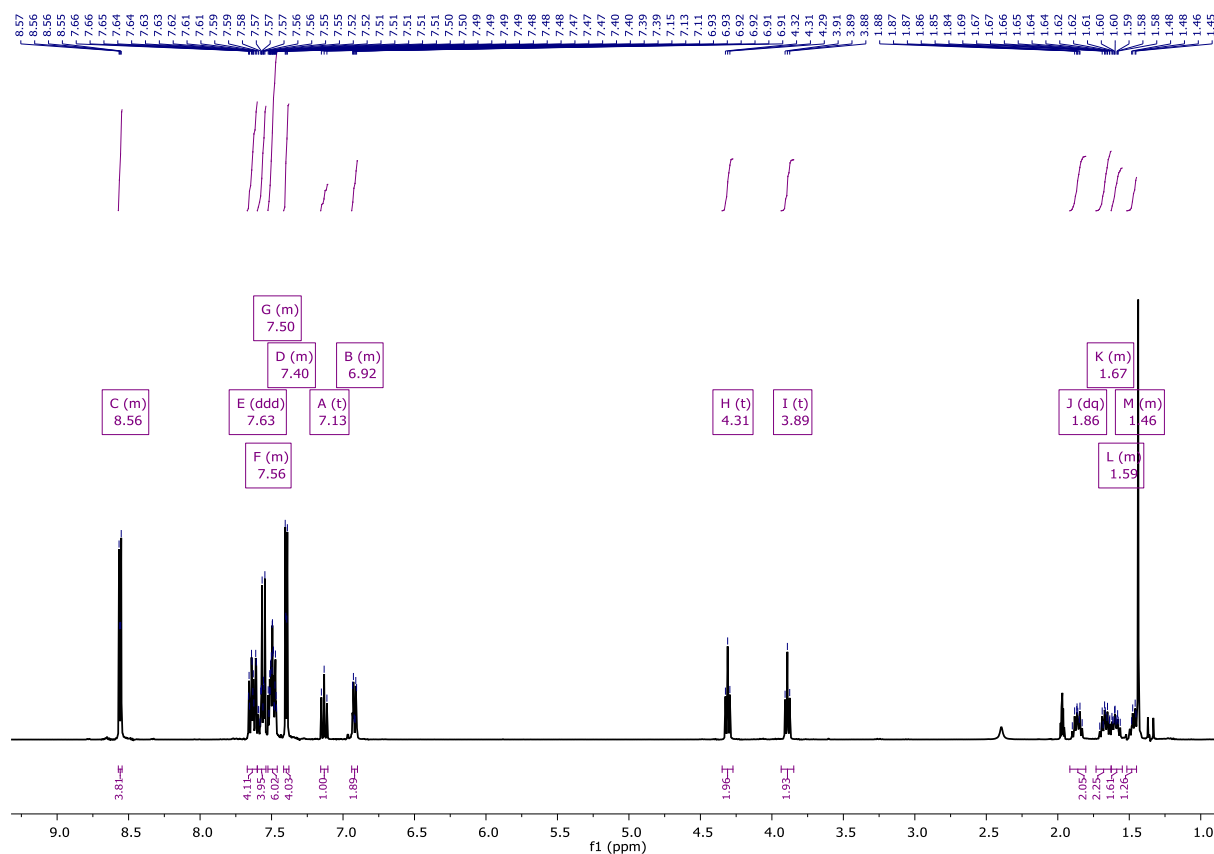

Figure S23. L<sup>P0</sup> building block, <sup>1</sup>H NMR in MeCN-*d*<sub>3</sub>.

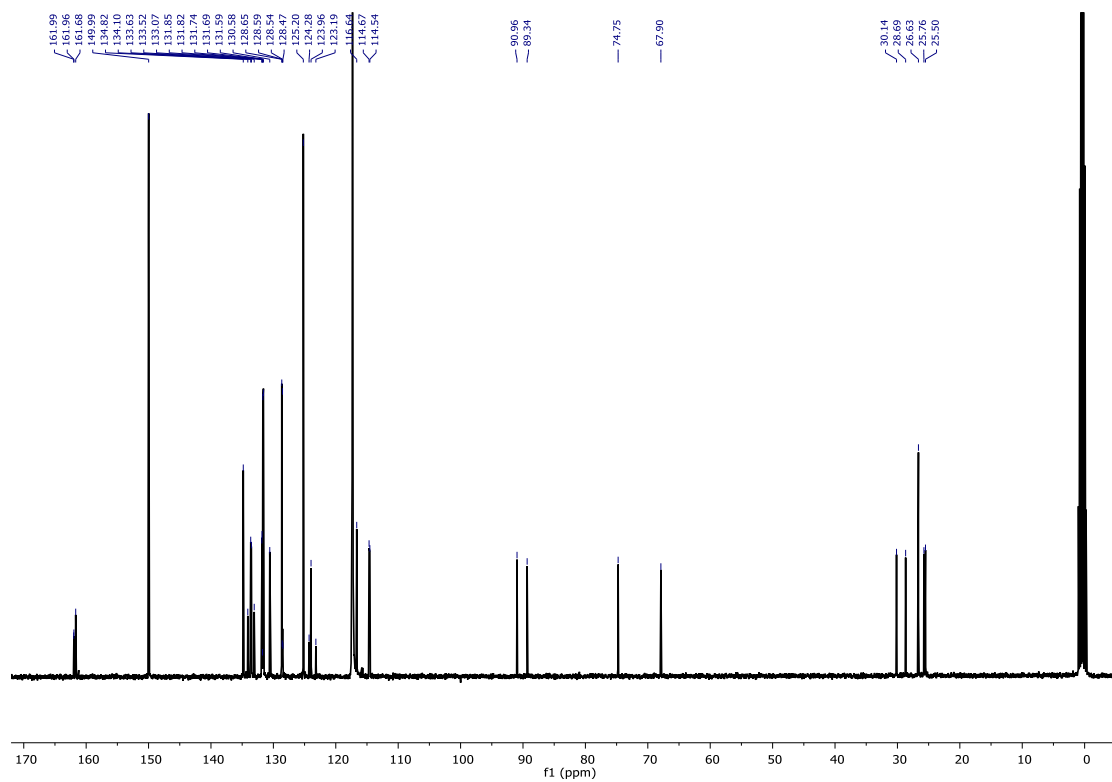

**Figure S24.**  $L^0$  building block,  $^{13}\text{C}$  NMR in  $\text{MeCN-d}_3$ .

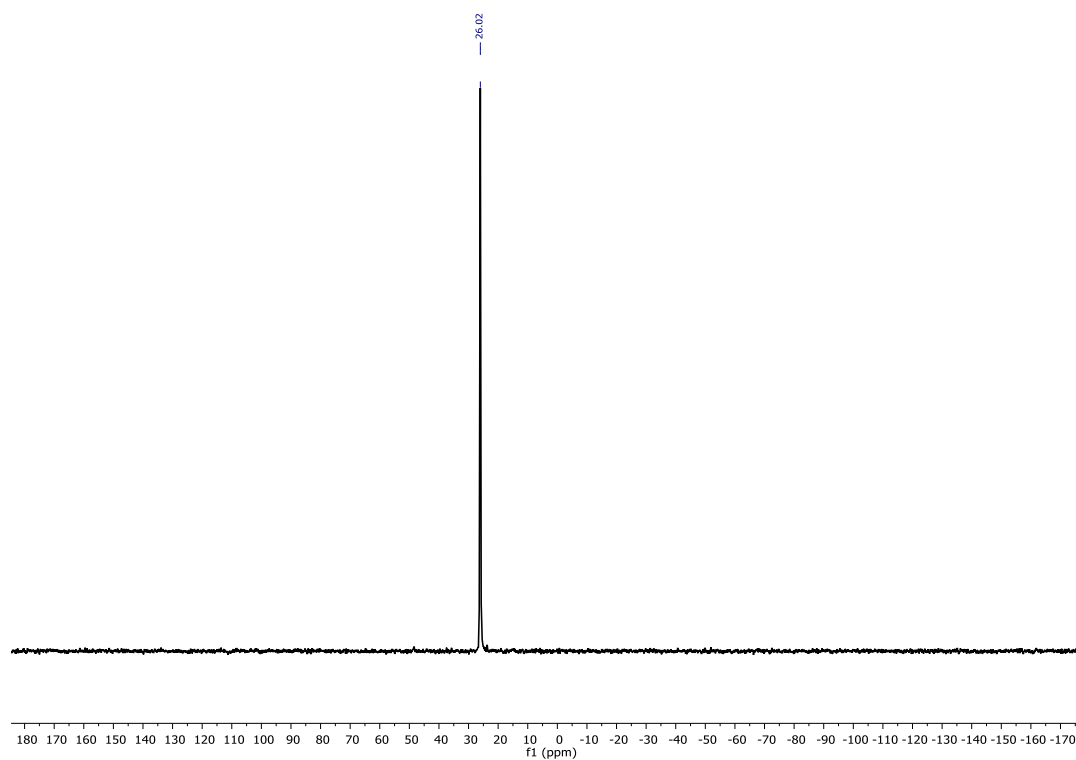

**Figure S25.**  $L^0$  building block,  $^{31}\text{P}$  NMR in  $\text{MeCN-d}_3$ .

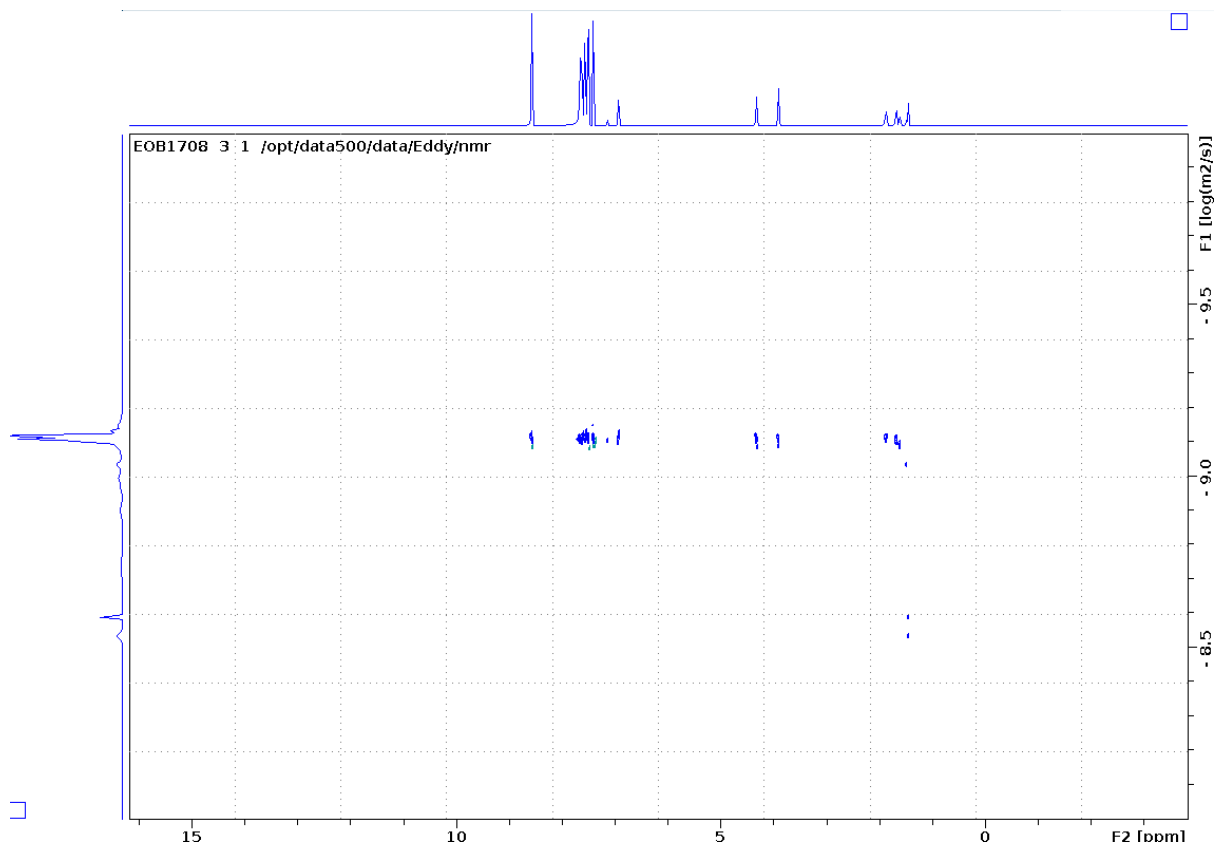

**Figure S26.**  $L^0$  building block, DOSY in MeCN- $d_3$  at 25°C.

### Synthesis of $L^{exoPy}$

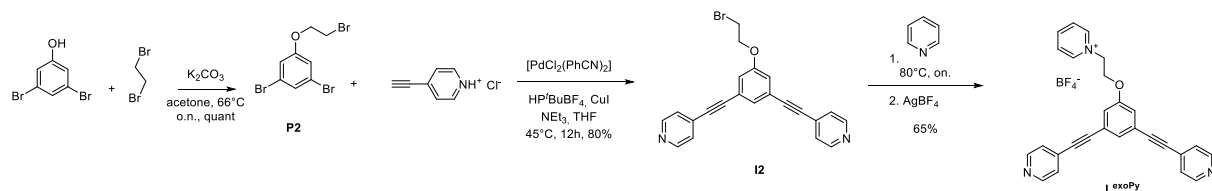

**Scheme S7.** Synthetic route for  $L^{exoPy}$ .

**P2** was synthesized according to the procedure described before for **P4**. Briefly, 3,5-dibromophenol (5g, 19.84 mmol, 1 eq.) was refluxed with 1,2-dibromoethane (73 g, 397 mmol, 20 eq.) and  $K_2CO_3$  (8.2 g, 60 mmol, 3 eq.) in 100 mL acetone overnight. Then, all volatiles were removed under reduced pressure at 90°C to afford the first intermediate **P2** in quantitative yield (7.1 g).

To a degassed solution of  $[Pd(PhCN)Cl_2]$  (126 mg, 0.33 mmol, 0.08 eq.) and  $HP^tBuBF_4$  (190 mg, 0.66 mmol, 0.12 eq.) in 20 mL  $NEt_3$  and 20 mL THF, **P2** (1.96 g, 5.5 mmol, 1 eq.) and 4-ethynylpyridine hydrochloride (2 g, 14.38 mmol, 2.5 eq.) were added. The mixture was heated to 45°C and  $CuI$  (42 mg, 0.22 mmol, 0.04 eq.) was added. After stirring the mixture at 45°C overnight, the solution was poured into 400 mL EtOAc and filtered over a pad of sand. The volatiles were removed under reduced pressure and the obtained

crude material was purified by column chromatography (SiO<sub>2</sub>, MeOH:DCM, 1:99 -> 4:96) to afford **I2** as a colorless solid (1.77 g, 80%). <sup>1</sup>H NMR (300 MHz, DMSO-*d*<sub>6</sub>) δ 8.70 – 8.63 (m, 4H), 7.60 – 7.52 (m, 4H), 7.48 (t, *J* = 1.3 Hz, 1H), 7.34 (d, *J* = 1.3 Hz, 2H), 4.45 (dd, *J* = 6.2, 4.6 Hz, 2H), 3.84 (dd, *J* = 6.2, 4.5 Hz, 2H). <sup>13</sup>C NMR (75 MHz, DMSO) δ 158.52, 150.50, 130.19, 128.09, 125.88, 125.72, 123.62, 121.28, 119.54, 92.51, 87.91, 68.74, 31.63.

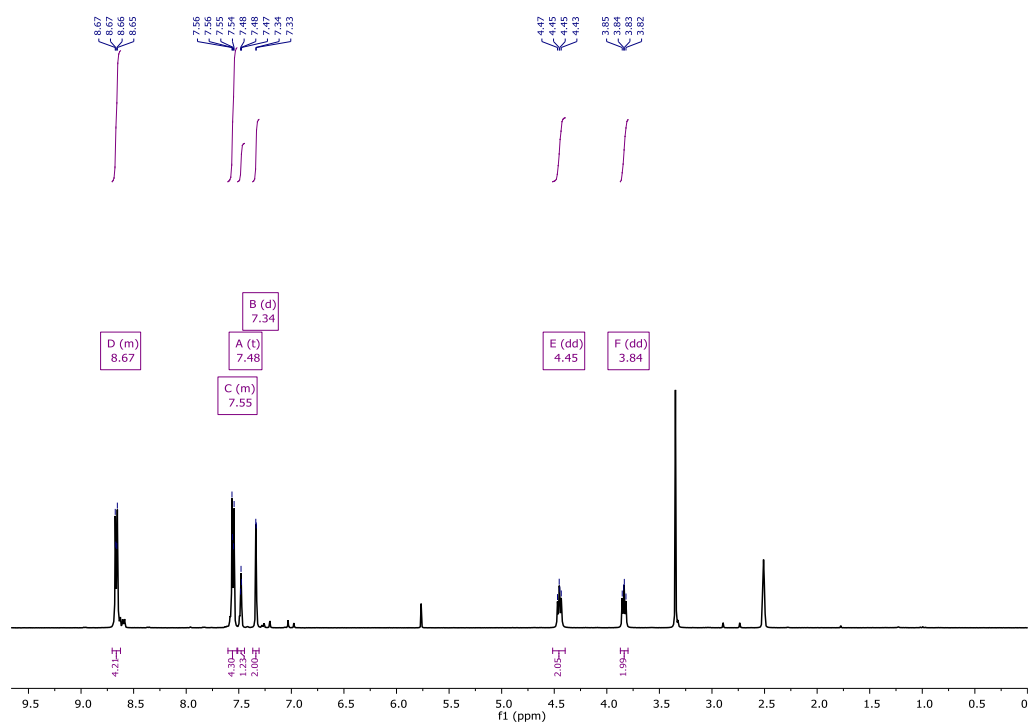

**Figure S27.** **I2** intermediate, <sup>1</sup>H NMR in dmsO-*d*<sub>6</sub>.

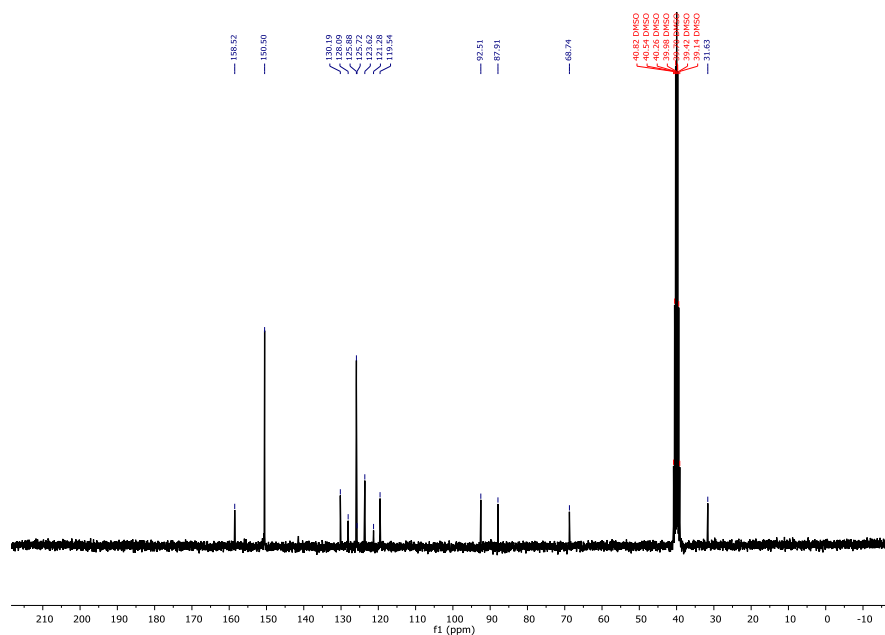

**Figure S28.** **I2** intermediate, <sup>13</sup>C NMR in dmsO-*d*<sub>6</sub>.

**L<sup>exo</sup>Py**: A solution of **I2** (0.2 g, 0.5 mmol, 1 eq.) in 10 mL pyridine was heated at 90°C for 24 h. The solvent was removed under reduced pressure. The resulting oil was dissolved in a minimum amount of DCM and precipitated in 1L Et<sub>2</sub>O to afford the hygroscopic bromide salt. To a solution of this intermediate (230 mg, 0.47 mmol, 1 eq.) in 3 mL DCM and 3 mL MeCN, AgBF<sub>4</sub> (91 mg, 0.47 mmol, 1 eq.) were added in the dark. The suspension was stirred over night at room temperature. The solvent was removed under reduced pressure. The residue was dissolved in 5 mL DCM and filtered over a pad of celite. The volatiles were removed under reduced pressure to afford of **L<sup>exo</sup>Py** (161 mg, 0.33 mmol, 70%) as a bright beige oil. <sup>1</sup>H NMR (400 MHz, Acetonitrile-*d*<sub>3</sub>) δ 8.88 – 8.83 (m, 2H), 8.66 – 8.62 (m, 4H), 8.59 (ddt, *J* = 9.2, 7.9, 1.5 Hz, 2H), 8.15 – 8.06 (m, 2H), 7.51 – 7.45 (m, 4H), 7.44 (s, 1H), 7.23 (d, *J* = 1.3 Hz, 2H), 5.05 – 4.94 (m, 2H), 4.58 – 4.50 (m, 2H). <sup>13</sup>C NMR (101 MHz, CD<sub>3</sub>CN) δ 158.24, 151.00, 150.66, 150.59, 147.00, 145.87, 141.22, 130.95, 128.87, 128.82, 126.02, 125.97, 124.35, 121.39, 119.41, 112.67, 92.18, 87.85, 66.94, 61.25. HR-ESI-MS, calculated for C<sub>27</sub>H<sub>20</sub>N<sub>3</sub>O 402.1601, obtained 402.1600.

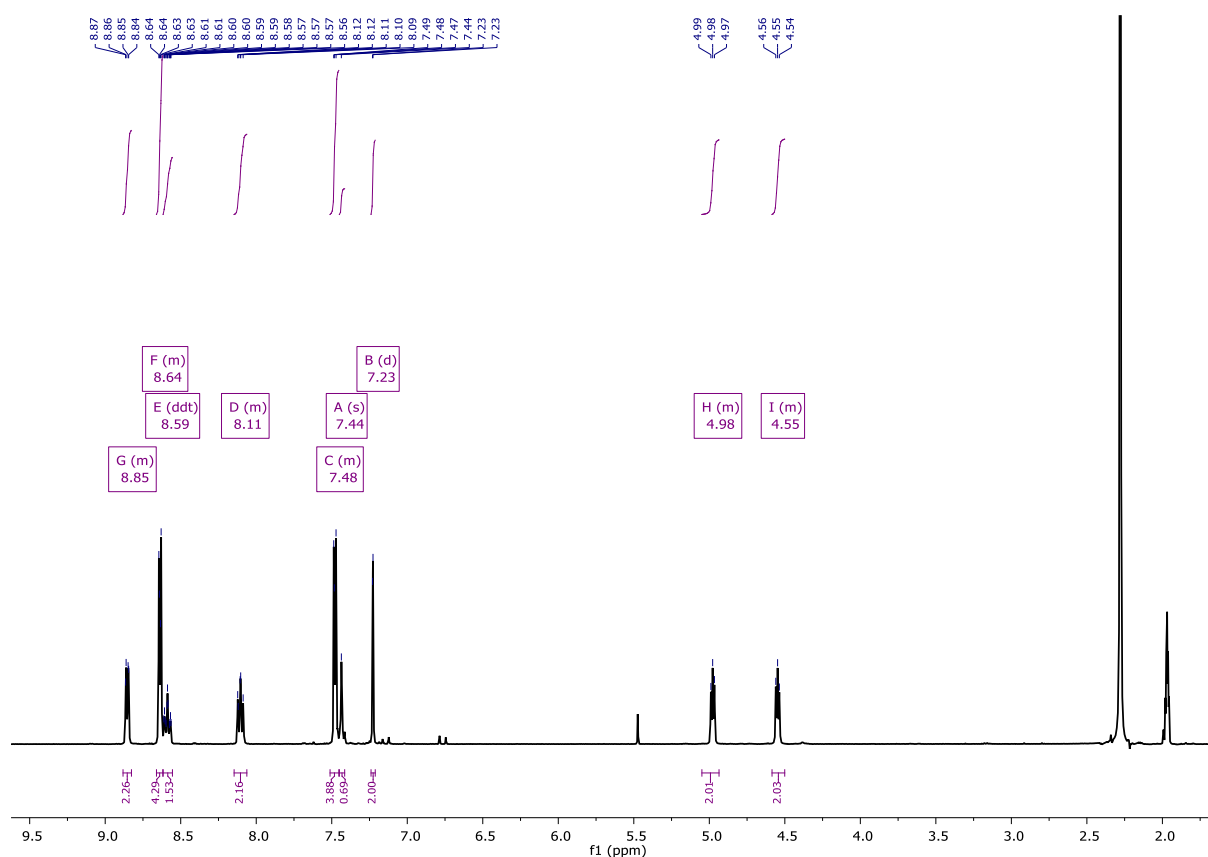

**Figure S29.** **L<sup>exo</sup>Py** building block, <sup>1</sup>H NMR in MeCN-*d*<sub>3</sub>.

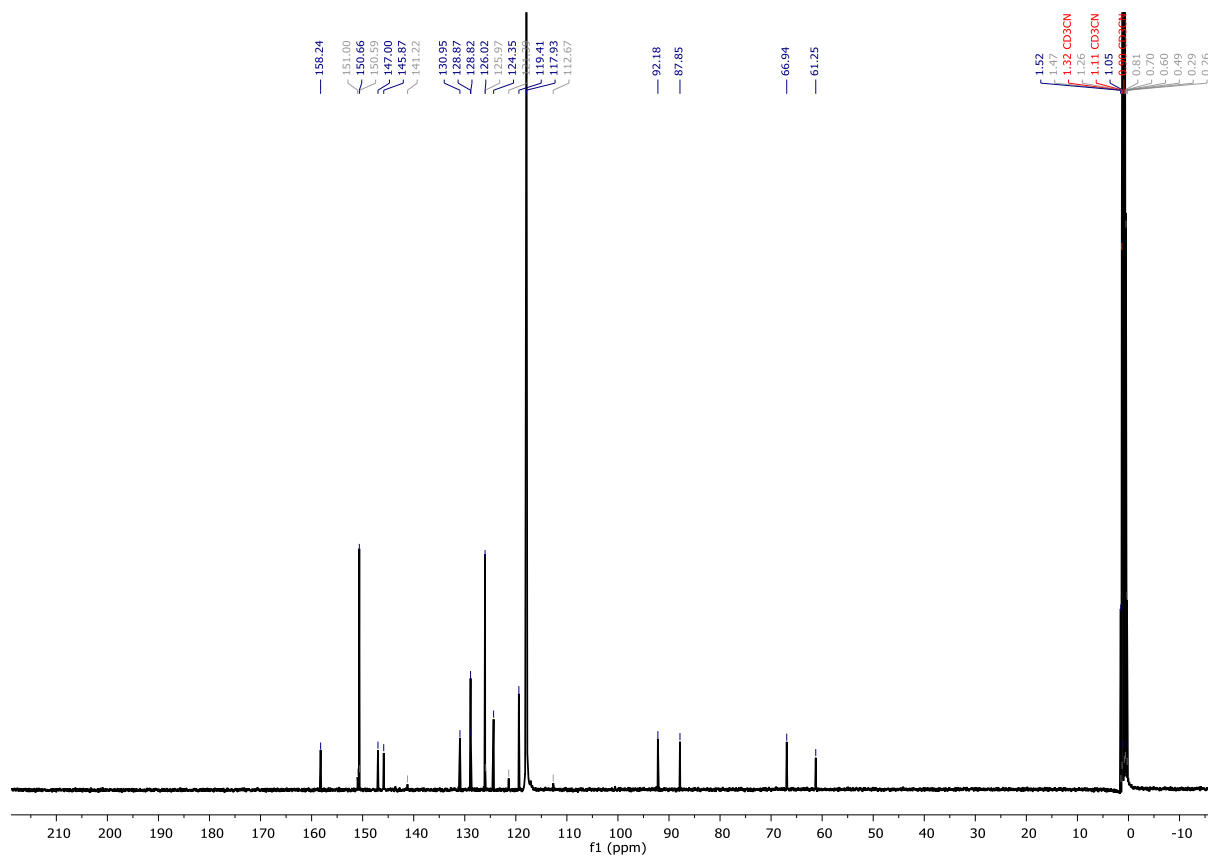

**Figure S30.** LexoPy building block, <sup>13</sup>C NMR in MeCN-d<sub>3</sub>.

## Sphere Synthesis (SI2)

All spheres were prepared as 0.41mM solutions in 1 mL dry and degassed acetonitrile at noted temperature and time in 10 mL high pressure tubes. The tubes were heated using an oil bath with the oil level not exceeding the solvent level. The experimental setup for sphere formation is depicted herewith:

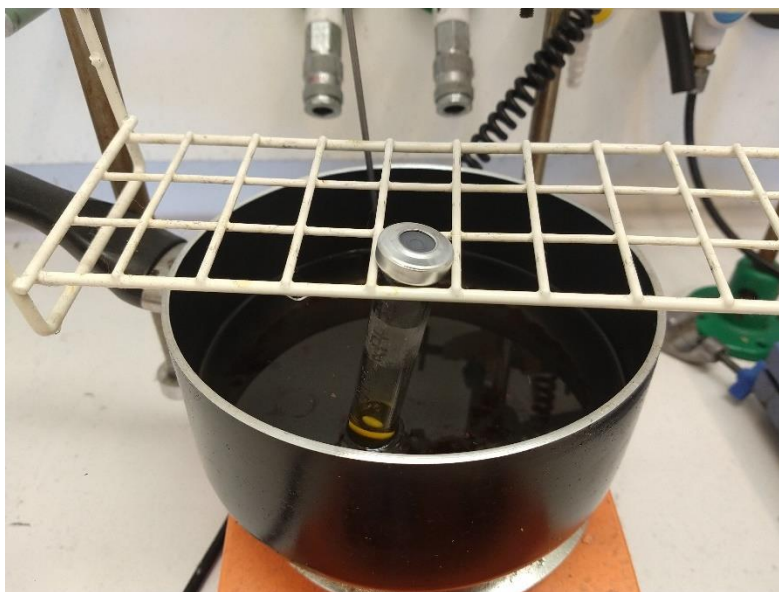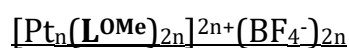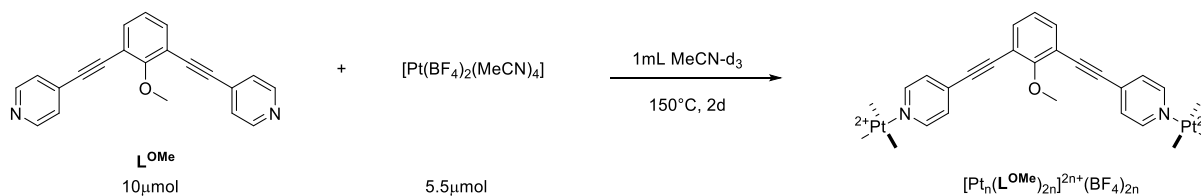

To a solution of  $\text{L}^{\text{OMe}}$  (3.1 mg, 10  $\mu\text{mol}$ , 1 eq.) in 0.5 mL MeCN- $d_3$ ,  $[\text{Pt}(\text{BF}_4)_2(\text{MeCN})_4]$  (2.93 mg, 5.5  $\mu\text{mol}$ , 0.55 eq.) in 0.5 mL MeCN- $d_3$  was added. The solution was then stirred at 150°C for 2d in a 10 mL high pressure tube.  $^1\text{H}$  NMR (400 MHz, Acetonitrile- $d_3$ )  $\delta$  8.95 (s, 4H), 7.68 (s, 6H), 7.35 – 7.13 (m, 1H), 4.14 (s, 3H). LogD ( $\text{m}^2/\text{s}$ ) at 25°C (MeCN- $d_3$ ): -9.565 ( $d = 4,67$  nm).

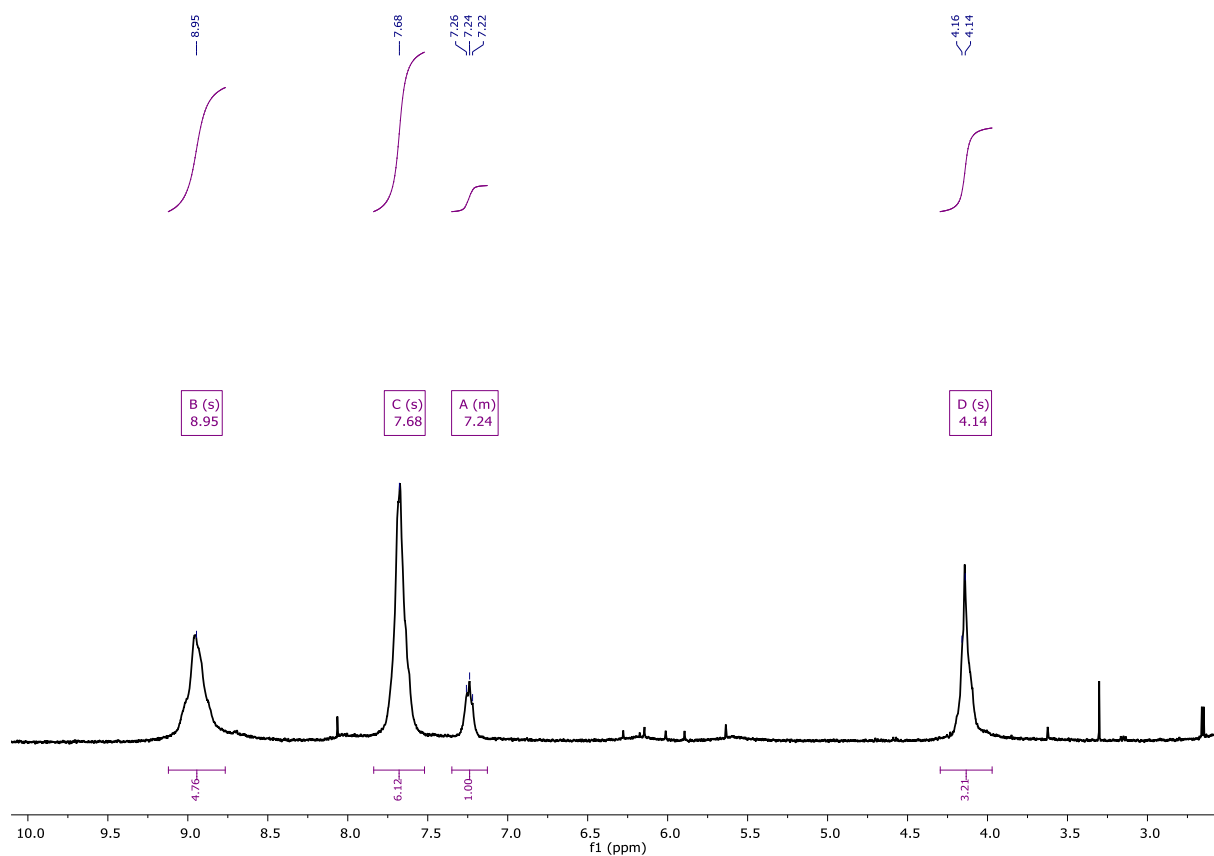

**Figure S31.**  $[\text{Pt}_n(\text{L}^{\text{OMe}})_2n]^{2n+}(\text{BF}_4^-)_{2n}$  sphere,  $^1\text{H}$  NMR in  $\text{MeCN-d}_3$ .

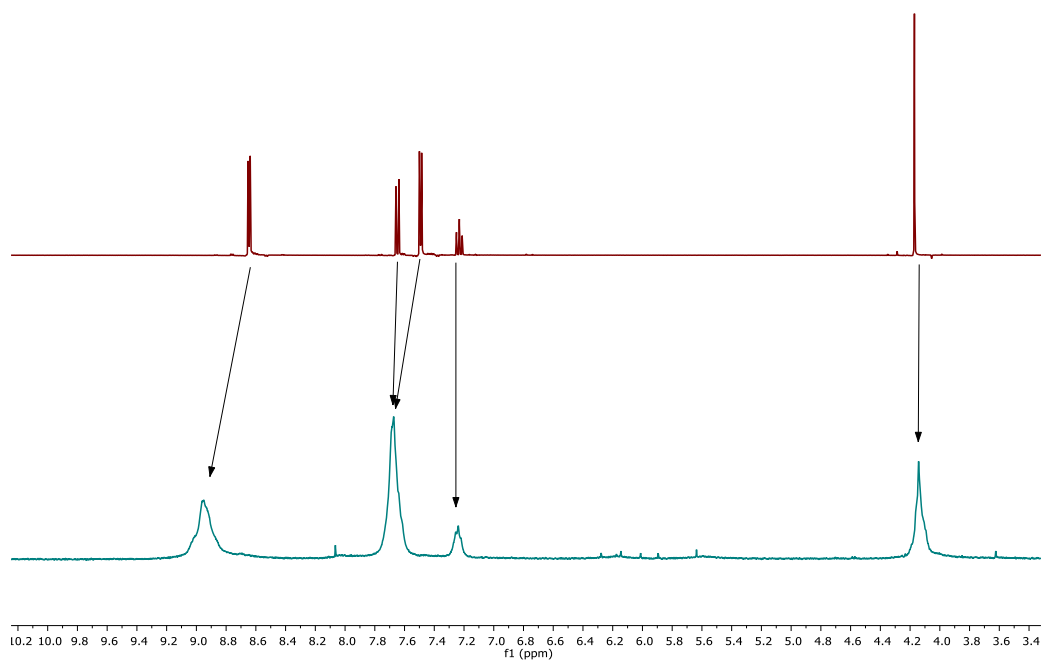

**Figure S32.** Comparison of free  $\text{L}^{\text{OMe}}$  building block (top) and  $[\text{Pt}_n(\text{L}^{\text{OMe}})_2n]^{2n+}(\text{BF}_4^-)_{2n}$  sphere (bottom),  $^1\text{H}$  NMR in  $\text{MeCN-d}_3$ .



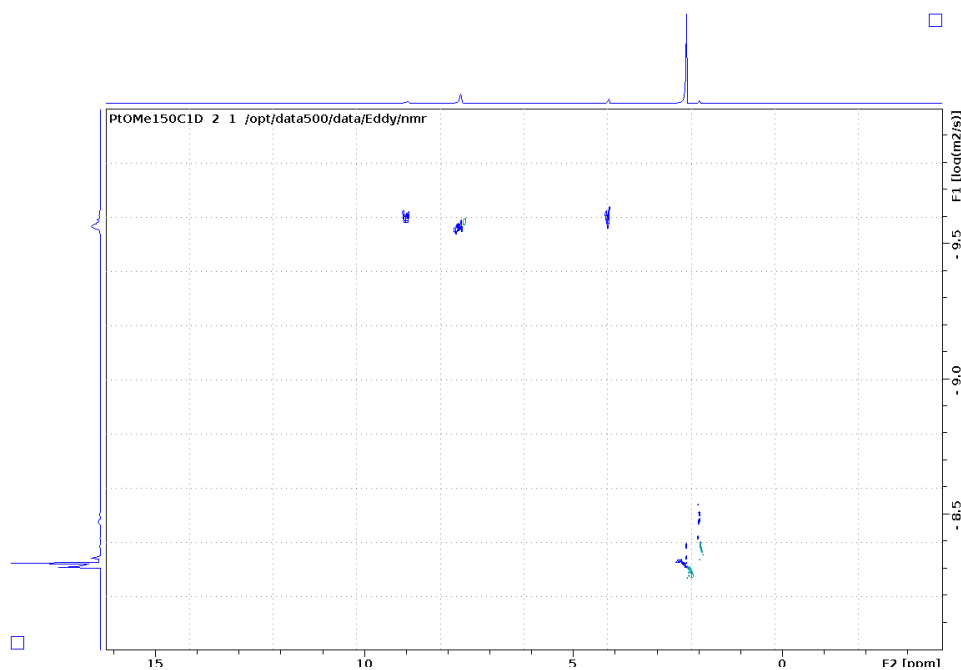

**Figure S33.**  $[\text{Pt}_n(\text{L}^{\text{OMe}})_2n]^{2n+}(\text{BF}_4^-)_{2n}$  cage prepared at 150°C, DOSY in MeCN- $d_3$  at 25°C.

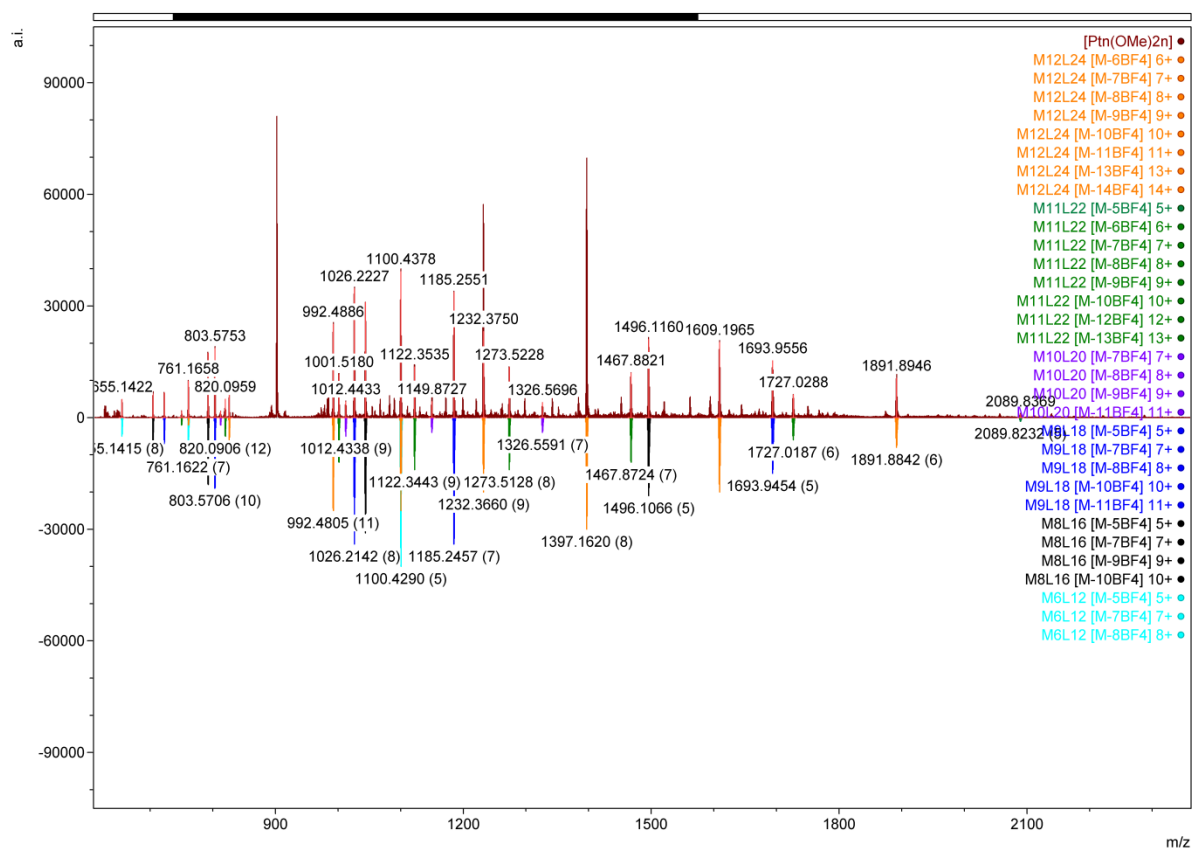

**Figure S34.** Full ESI-MS spectra of  $[\text{Pt}_n(\text{L}^{\text{OMe}})_2n]^{2n+}(\text{BF}_4^-)_{2n}$  prepared at 110°C for 3d. Below the simulated spectra of different sphere types, above obtained spectra.

**Table S1.** Calculated and observed species of the  $[\text{Pt}_n(\text{LOMe})_{2n}]^{2n+}$  assemblies of a sample prepared at 110°C for 3d.

| Cage Type                       | Composition                                                    | Calculated | Found     |
|---------------------------------|----------------------------------------------------------------|------------|-----------|
| M <sub>6</sub> L <sub>12</sub>  | $[\text{Pt}_6(\text{LOMe})_{12}(\text{BF}_4^-)_4]^{8+}$        | 655.1415   | 655.1422  |
|                                 | $[\text{Pt}_6(\text{LOMe})_{12}(\text{BF}_4^-)_5]^{7+}$        | 761.1622   | 761.1658  |
|                                 | $[\text{Pt}_6(\text{LOMe})_{12}(\text{BF}_4^-)_7]^{5+}$        | 1100.4290  | 1100.4378 |
| M <sub>7</sub> L <sub>14</sub>  | $[\text{Pt}_7(\text{LOMe})_{14}(\text{BF}_4^-)_8]^{6+}$        | 1067.3890  | 1067.3957 |
|                                 | $[\text{Pt}_7(\text{LOMe})_{14}(\text{BF}_4^-)_9]^{5+}$        | 1298.2678  | 1298.2773 |
|                                 | $[\text{Pt}_7(\text{LOMe})_{14}(\text{BF}_4^-)_{10}]^{4+}$     | 1644.5858  | 1644.5965 |
| M <sub>8</sub> L <sub>16</sub>  | $[\text{Pt}_8(\text{LOMe})_{16}(\text{BF}_4^-)_6]^{10+}$       | 704.6512   | 704.6535  |
|                                 | $[\text{Pt}_8(\text{LOMe})_{16}(\text{BF}_4^-)_7]^{9+}$        | 792.6129   | 792.6177  |
|                                 | $[\text{Pt}_8(\text{LOMe})_{16}(\text{BF}_4^-)_9]^{7+}$        | 1043.7892  | 1043.7972 |
|                                 | $[\text{Pt}_8(\text{LOMe})_{16}(\text{BF}_4^-)_{11}]^{5+}$     | 1496.1066  | 1496.1160 |
| M <sub>9</sub> L <sub>18</sub>  | $[\text{Pt}_9(\text{LOMe})_{18}(\text{BF}_4^-)_7]^{11+}$       | 722.6092   | 722.6121  |
|                                 | $[\text{Pt}_9(\text{LOMe})_{18}(\text{BF}_4^-)_8]^{10+}$       | 803.5706   | 803.5753  |
|                                 | $[\text{Pt}_9(\text{LOMe})_{18}(\text{BF}_4^-)_{10}]^{8+}$     | 1026.2142  | 1026.2227 |
|                                 | $[\text{Pt}_9(\text{LOMe})_{18}(\text{BF}_4^-)_{11}]^{7+}$     | 1185.2457  | 1185.2551 |
|                                 | $[\text{Pt}_9(\text{LOMe})_{18}(\text{BF}_4^-)_{13}]^{5+}$     | 1693.9454  | 1693.9556 |
| M <sub>10</sub> L <sub>20</sub> | $[\text{Pt}_{10}(\text{LOMe})_{20}(\text{BF}_4^-)_9]^{11+}$    | 812.6270   | 812.6319  |
|                                 | $[\text{Pt}_{10}(\text{LOMe})_{20}(\text{BF}_4^-)_{11}]^{9+}$  | 1012.4338  | 1012.4433 |
|                                 | $[\text{Pt}_{10}(\text{LOMe})_{20}(\text{BF}_4^-)_{12}]^{8+}$  | 1149.8637  | 1149.8727 |
|                                 | $[\text{Pt}_{10}(\text{LOMe})_{20}(\text{BF}_4^-)_{13}]^{7+}$  | 1326.5591  | 1326.5696 |
| M <sub>11</sub> L <sub>22</sub> | $[\text{Pt}_{11}(\text{LOMe})_{22}(\text{BF}_4^-)_9]^{13+}$    | 750.3140   | 750.3177  |
|                                 | $[\text{Pt}_{11}(\text{LOMe})_{22}(\text{BF}_4^-)_{10}]^{12+}$ | 820.0906   | 820.0959  |
|                                 | $[\text{Pt}_{11}(\text{LOMe})_{22}(\text{BF}_4^-)_{12}]^{10+}$ | 1001.5096  | 1001.5180 |
|                                 | $[\text{Pt}_{11}(\text{LOMe})_{22}(\text{BF}_4^-)_{13}]^{9+}$  | 1122.3443  | 1122.3535 |
|                                 | $[\text{Pt}_{11}(\text{LOMe})_{22}(\text{BF}_4^-)_{14}]^{8+}$  | 1273.5128  | 1273.5228 |
|                                 | $[\text{Pt}_{11}(\text{LOMe})_{22}(\text{BF}_4^-)_{15}]^{7+}$  | 1467.8724  | 1467.8821 |
|                                 | $[\text{Pt}_{11}(\text{LOMe})_{22}(\text{BF}_4^-)_{16}]^{6+}$  | 1727.0187  | 1727.0288 |
|                                 | $[\text{Pt}_{11}(\text{LOMe})_{22}(\text{BF}_4^-)_{17}]^{5+}$  | 2089.8232  | 2089.8369 |
| M <sub>12</sub> L <sub>24</sub> | $[\text{Pt}_{12}(\text{LOMe})_{24}(\text{BF}_4^-)_{10}]^{14+}$ | 761.2338   | 761.2381  |
|                                 | $[\text{Pt}_{12}(\text{LOMe})_{24}(\text{BF}_4^-)_{11}]^{13+}$ | 826.4059   | 826.4113  |
|                                 | $[\text{Pt}_{12}(\text{LOMe})_{24}(\text{BF}_4^-)_{13}]^{11+}$ | 992.4805   | 992.4886  |
|                                 | $[\text{Pt}_{12}(\text{LOMe})_{24}(\text{BF}_4^-)_{14}]^{10+}$ | 1100.4290  | 1100.4378 |
|                                 | $[\text{Pt}_{12}(\text{LOMe})_{24}(\text{BF}_4^-)_{15}]^{9+}$  | 1232.3660  | 1232.3750 |
|                                 | $[\text{Pt}_{12}(\text{LOMe})_{24}(\text{BF}_4^-)_{17}]^{7+}$  | 1609.1860  | 1609.1965 |
|                                 | $[\text{Pt}_{12}(\text{LOMe})_{24}(\text{BF}_4^-)_{18}]^{6+}$  | 1891.8842  | 1891.8946 |

**Table S2.** Zoom into different charged species of  $[\text{Pt}_n(\text{L}^{\text{OMe}})_{2n}]^{2n+}$  assemblies of a sample prepared at 110°C for 3d.

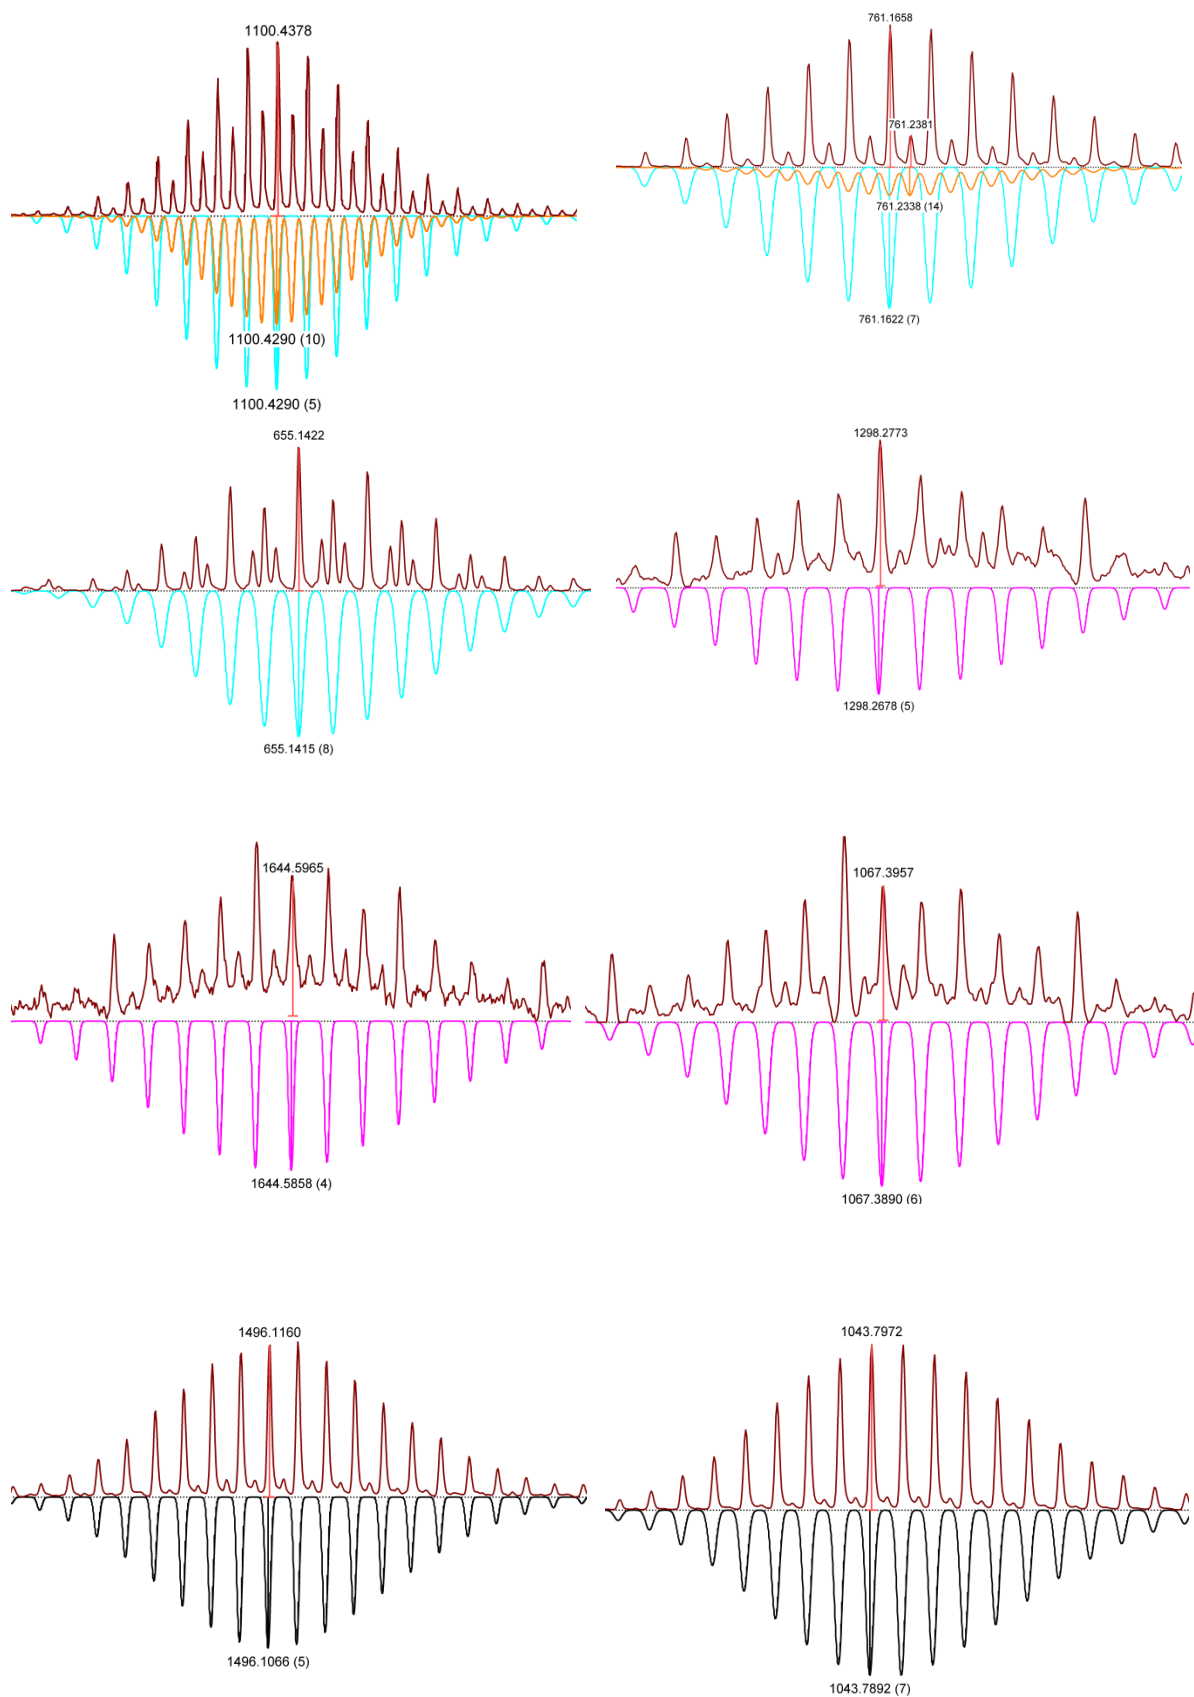

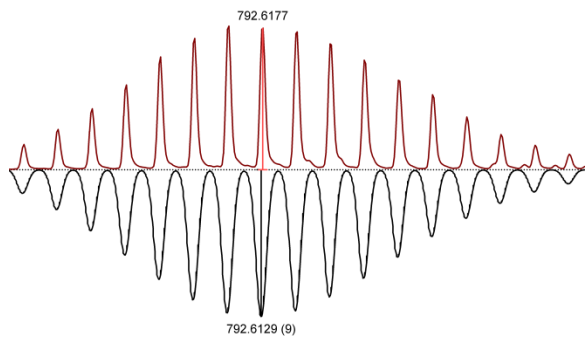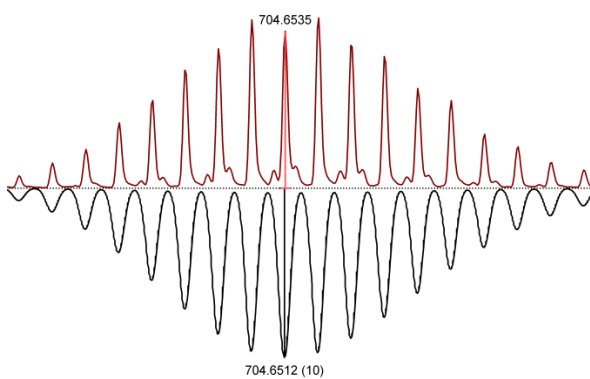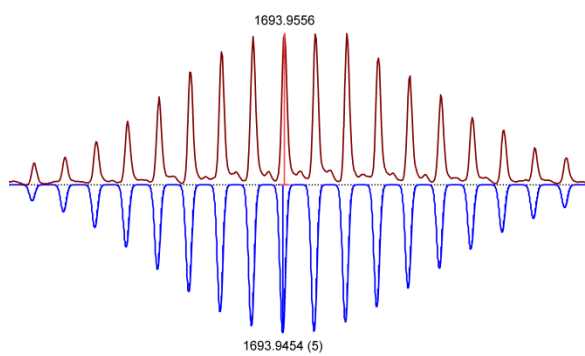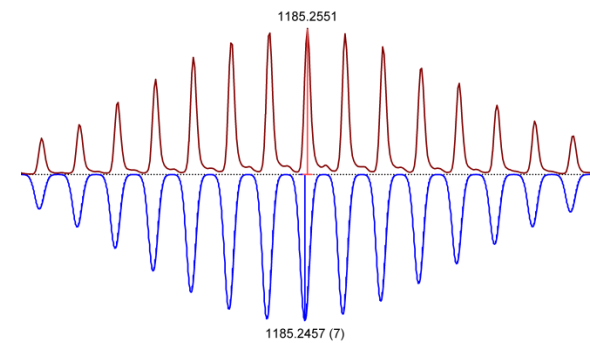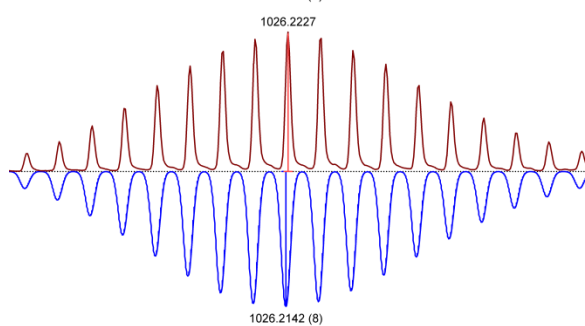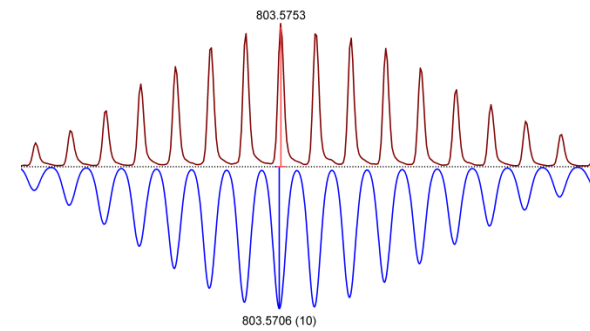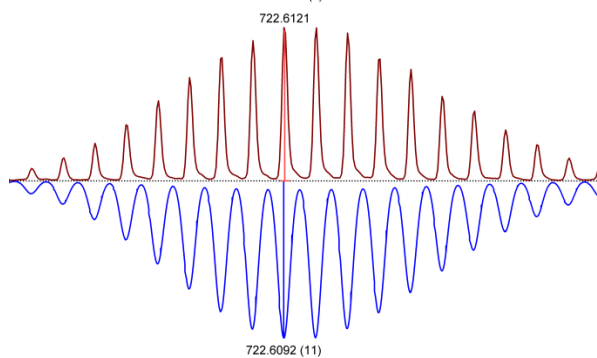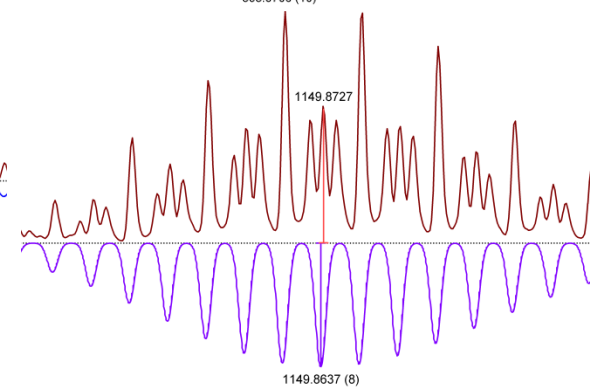

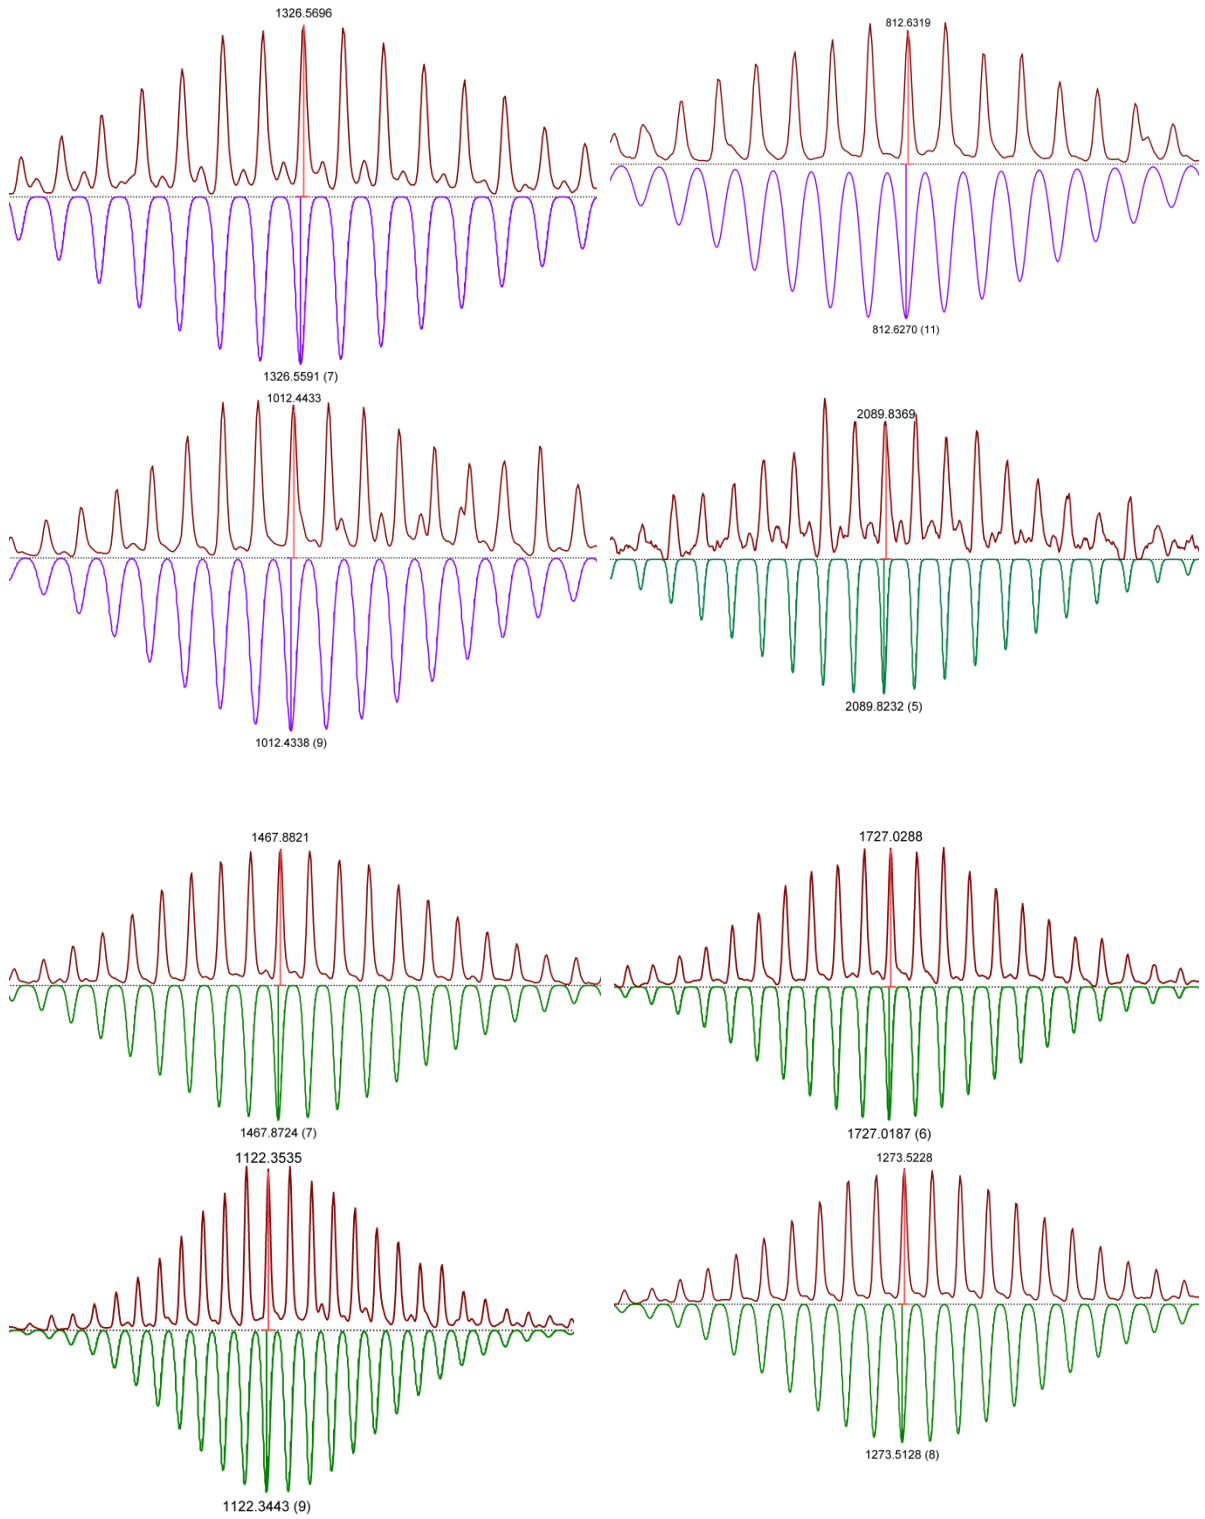

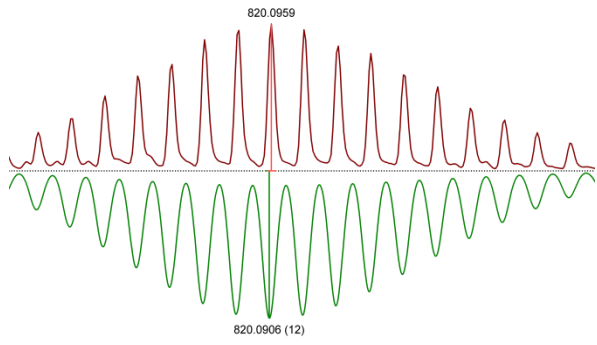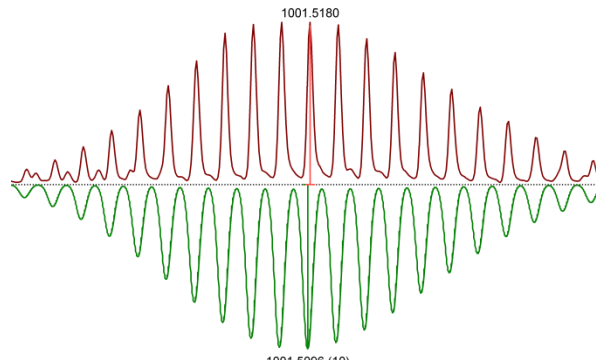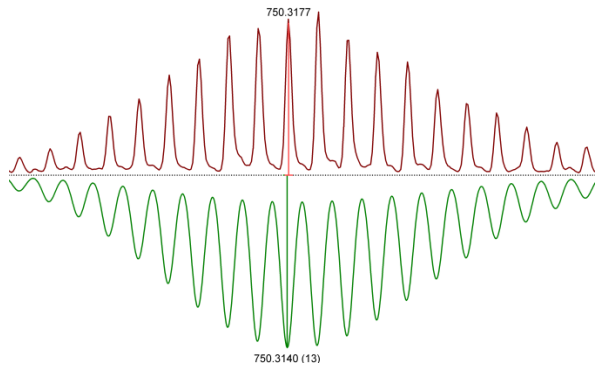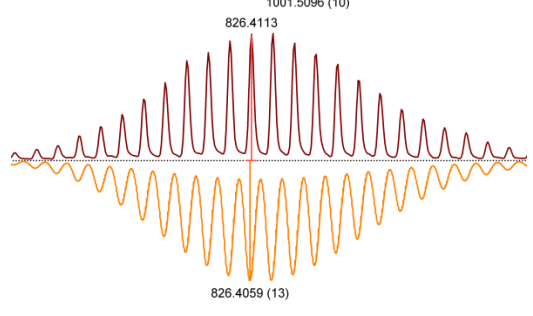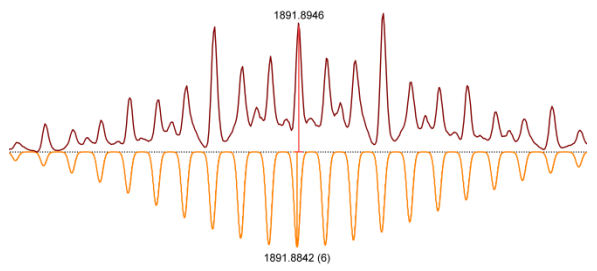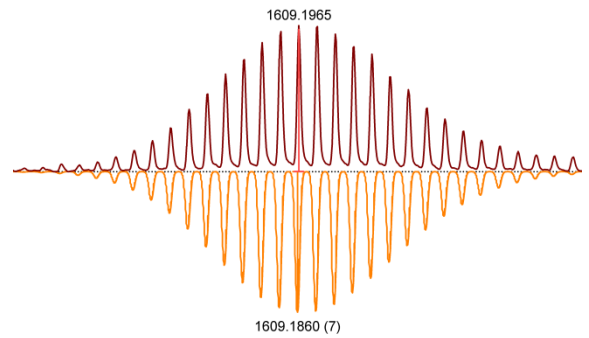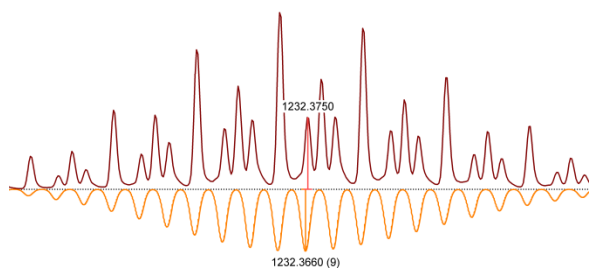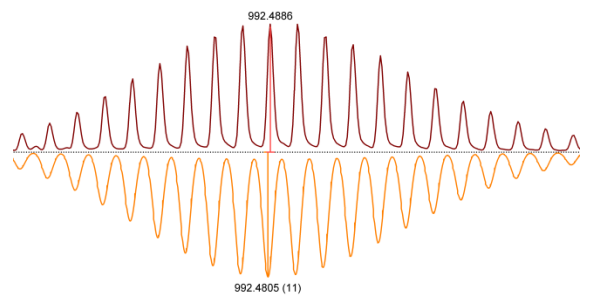

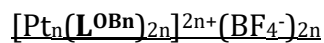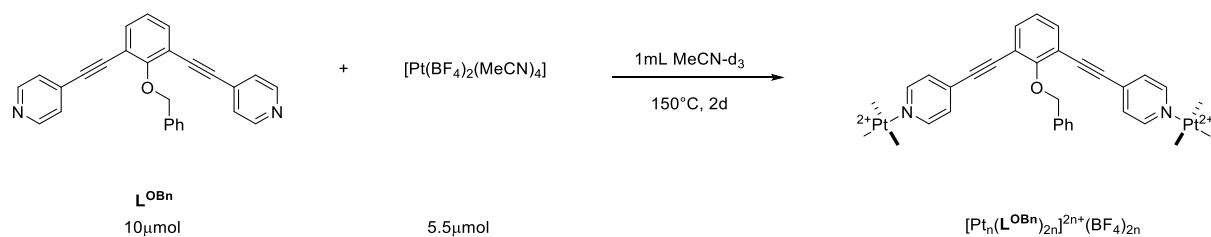

To a solution of  $\text{L}^{\text{OBn}}$  (3.86 mg, 10  $\mu\text{mol}$ , 1 eq.) in 0.5 mL MeCN- $d_3$ ,  $[\text{Pt}(\text{BF}_4)_2(\text{MeCN})_4]$  (2.93 mg, 5.5  $\mu\text{mol}$ , 0.55 eq.) in 0.5 mL MeCN- $d_3$  was added. The solution was then stirred at 150°C for 2d in a 10 mL high pressure tube.  $^1\text{H}$  NMR (400 MHz, Acetonitrile- $d_3$ )  $\delta$  8.87 (d,  $J = 37.4$  Hz, 4H), 7.88 – 7.60 (m, 1H), 7.60 – 7.32 (m, 5H), 7.32 – 7.11 (m, 2H), 5.52 – 5.30 (m, 2H). LogD( $\text{m}^2/\text{s}$ ) at 25°C (MeCN- $d_3$ ): -9.433 (d = 3.45 nm).

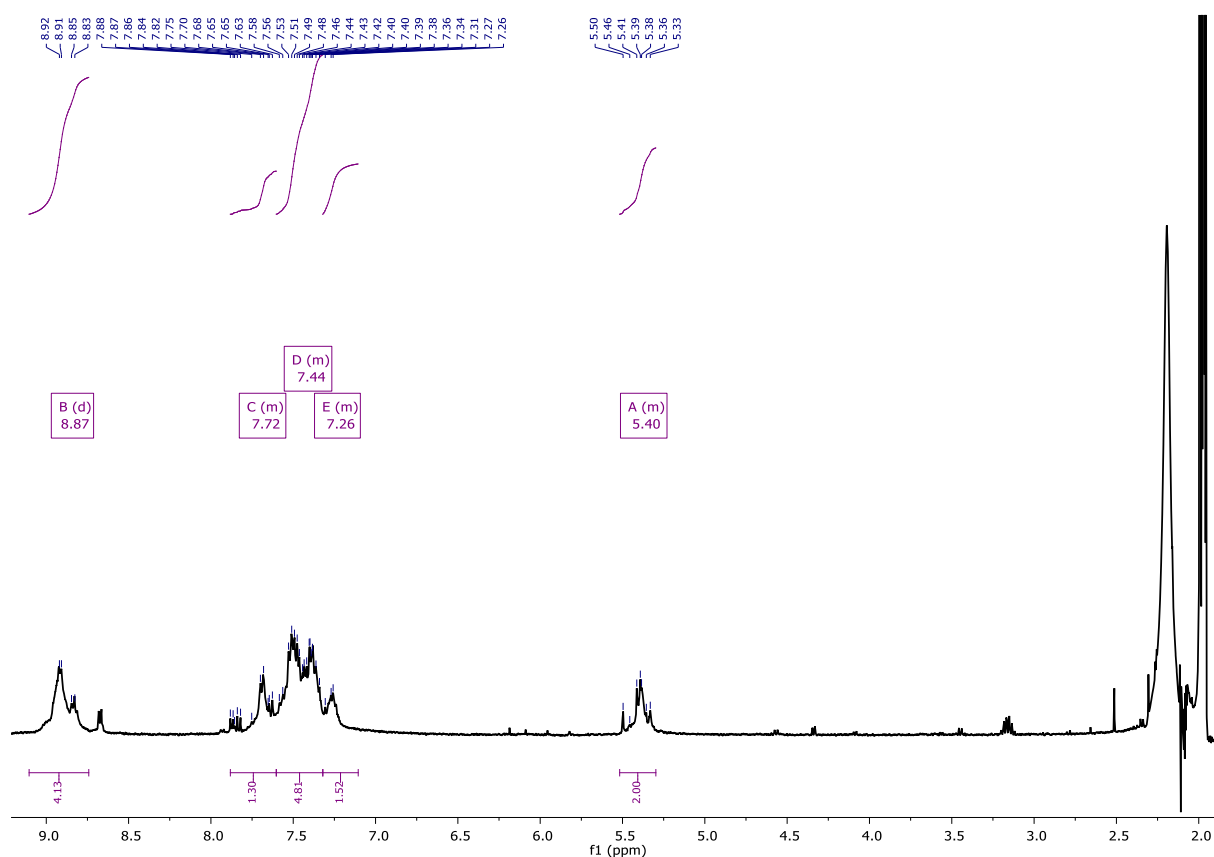

**Figure S35.**  $[\text{Pt}_n(\text{L}^{\text{OBn}})_{2n}]^{2n+}(\text{BF}_4^-)_{2n}$  sphere,  $^1\text{H}$  NMR in MeCN- $d_3$ .

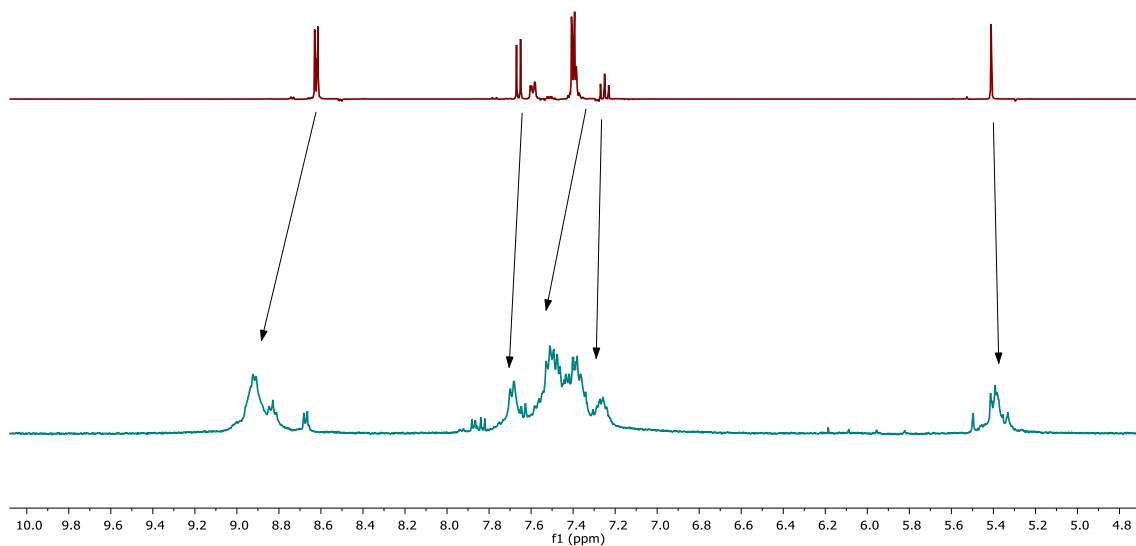

**Figure S36.** Comparison of free  $\text{LOBn}$  building block (top) and  $[\text{Pt}_n(\text{LOBn})_{2n}]^{2n+}(\text{BF}_4^-)_{2n}$  sphere (bottom),  $^1\text{H}$  NMR in  $\text{MeCN-d}_3$ .

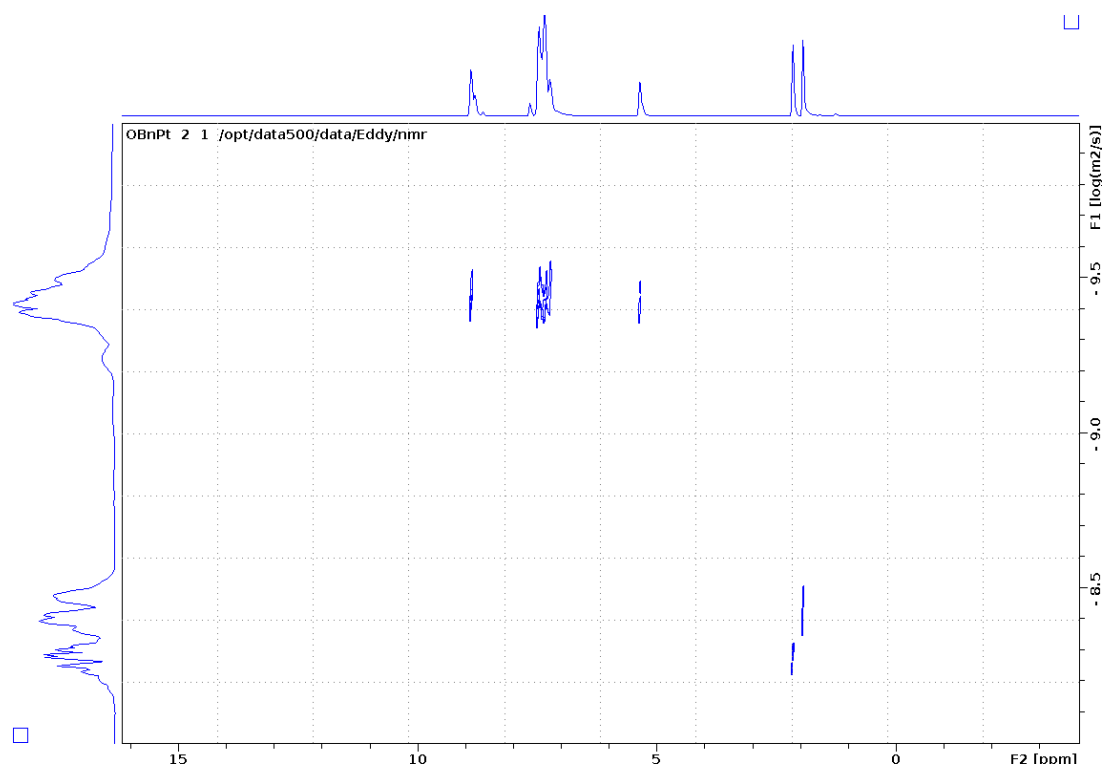

**Figure S37.**  $[\text{Pt}_n(\text{LOBn})_{2n}]^{2n+}(\text{BF}_4^-)_{2n}$  cage prepared at  $150^\circ\text{C}$ , DOSY in  $\text{MeCN-d}_3$  at  $25^\circ\text{C}$ .



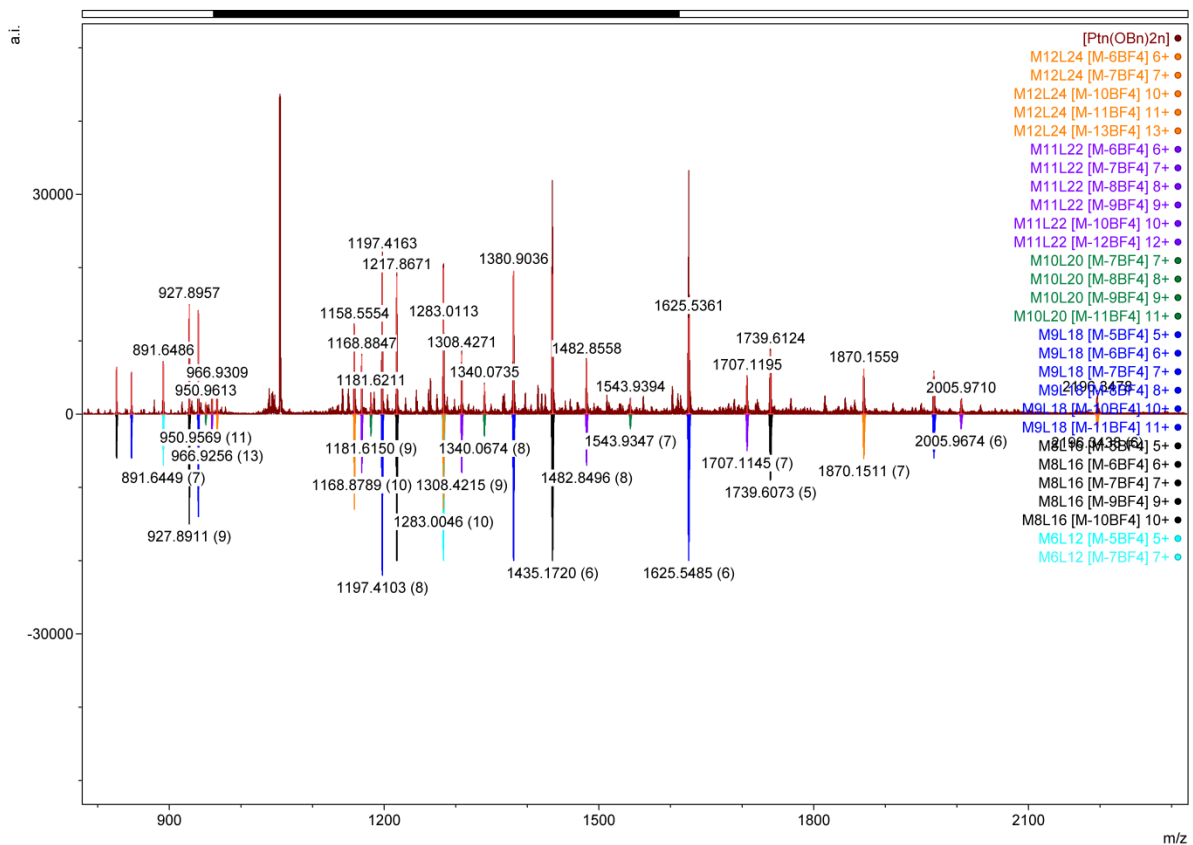

**Figure S38.** Full ESI-MS spectra of  $[\text{Pt}_n(\text{L}^{\text{OBn}})_2n]^{2n+}(\text{BF}_4^-)_2n$  prepared at  $150^\circ\text{C}$  for 2d. Below the simulated spectra of different sphere types, above obtained spectra.

**Table S3.** Calculated and observed species of the  $[\text{Pt}_n(\text{LOBn})_{2n}]^{2n+}$  assemblies of a sample prepared at 150°C for 2d.

| Cage Type                       | Composition                                                    | Calculated | Found     |
|---------------------------------|----------------------------------------------------------------|------------|-----------|
| M <sub>6</sub> L <sub>12</sub>  | $[\text{Pt}_6(\text{LOBn})_{12}(\text{BF}_4^-)_5]^{7+}$        | 891.644    | 891.6486  |
|                                 | $[\text{Pt}_6(\text{LOBn})_{12}(\text{BF}_4^-)_7]^{5+}$        | 1282.9044  | 1282.9102 |
| M <sub>8</sub> L <sub>16</sub>  | $[\text{Pt}_8(\text{LOBn})_{16}(\text{BF}_4^-)_6]^{10+}$       | 826.4017   | 826.4046  |
|                                 | $[\text{Pt}_8(\text{LOBn})_{16}(\text{BF}_4^-)_7]^{9+}$        | 927.8911   | 927.8957  |
|                                 | $[\text{Pt}_8(\text{LOBn})_{16}(\text{BF}_4^-)_9]^{7+}$        | 1217.8613  | 1217.8671 |
|                                 | $[\text{Pt}_8(\text{LOBn})_{16}(\text{BF}_4^-)_{10}]^{6+}$     | 1435.1720  | 1435.1778 |
|                                 | $[\text{Pt}_8(\text{LOBn})_{16}(\text{BF}_4^-)_{11}]^{5+}$     | 1739.6073  | 1739.6124 |
| M <sub>9</sub> L <sub>18</sub>  | $[\text{Pt}_9(\text{LOBn})_{18}(\text{BF}_4^-)_7]^{11+}$       | 847.2063   | 847.2099  |
|                                 | $[\text{Pt}_9(\text{LOBn})_{18}(\text{BF}_4^-)_8]^{10+}$       | 940.5274   | 940.5316  |
|                                 | $[\text{Pt}_9(\text{LOBn})_{18}(\text{BF}_4^-)_{10}]^{8+}$     | 1197.4103  | 1197.4163 |
|                                 | $[\text{Pt}_9(\text{LOBn})_{18}(\text{BF}_4^-)_{11}]^{7+}$     | 1380.8981  | 1380.9036 |
|                                 | $[\text{Pt}_9(\text{LOBn})_{18}(\text{BF}_4^-)_{12}]^{6+}$     | 1625.5485  | 1625.5361 |
|                                 | $[\text{Pt}_9(\text{LOBn})_{18}(\text{BF}_4^-)_{13}]^{5+}$     | 1967.8587  | 1967.8636 |
| M <sub>10</sub> L <sub>20</sub> | $[\text{Pt}_{10}(\text{LOBn})_{20}(\text{BF}_4^-)_9]^{11+}$    | 950.9569   | 950.9613  |
|                                 | $[\text{Pt}_{10}(\text{LOBn})_{20}(\text{BF}_4^-)_{11}]^{9+}$  | 1181.6150  | 1181.6211 |
|                                 | $[\text{Pt}_{10}(\text{LOBn})_{20}(\text{BF}_4^-)_{12}]^{8+}$  | 1340.0674  | 1340.0735 |
|                                 | $[\text{Pt}_{10}(\text{LOBn})_{20}(\text{BF}_4^-)_{13}]^{7+}$  | 1543.9347  | 1543.9394 |
| M <sub>11</sub> L <sub>22</sub> | $[\text{Pt}_{11}(\text{LOBn})_{22}(\text{BF}_4^-)_{10}]^{12+}$ | 959.5650   | 959.5700  |
|                                 | $[\text{Pt}_{11}(\text{LOBn})_{22}(\text{BF}_4^-)_{12}]^{10+}$ | 1168.8789  | 1168.8847 |
|                                 | $[\text{Pt}_{11}(\text{LOBn})_{22}(\text{BF}_4^-)_{13}]^{9+}$  | 1308.4215  | 1308.4271 |
|                                 | $[\text{Pt}_{11}(\text{LOBn})_{22}(\text{BF}_4^-)_{14}]^{8+}$  | 1482.8496  | 1482.8558 |
|                                 | $[\text{Pt}_{11}(\text{LOBn})_{22}(\text{BF}_4^-)_{15}]^{7+}$  | 1707.1145  | 1707.1195 |
|                                 | $[\text{Pt}_{11}(\text{LOBn})_{22}(\text{BF}_4^-)_{16}]^{6+}$  | 2005.9674  | 2005.9710 |
| M <sub>12</sub> L <sub>24</sub> | $[\text{Pt}_{12}(\text{LOBn})_{24}(\text{BF}_4^-)_{11}]^{13+}$ | 966.9256   | 966.9309  |
|                                 | $[\text{Pt}_{12}(\text{LOBn})_{24}(\text{BF}_4^-)_{13}]^{11+}$ | 1158.5493  | 1158.5554 |
|                                 | $[\text{Pt}_{12}(\text{LOBn})_{24}(\text{BF}_4^-)_{14}]^{10+}$ | 1283.0046  | 1283.0113 |
|                                 | $[\text{Pt}_{12}(\text{LOBn})_{24}(\text{BF}_4^-)_{17}]^{7+}$  | 1870.1511  | 1870.1559 |
|                                 | $[\text{Pt}_{12}(\text{LOBn})_{24}(\text{BF}_4^-)_{18}]^{6+}$  | 2196.3438  | 2196.3478 |

**Table S4.** Zoom into different charged species of  $[\text{Pt}_n(\text{L}^{\text{OBn}})_{2n}]^{2n+}$  assemblies of a sample prepared at 150°C for 2d.

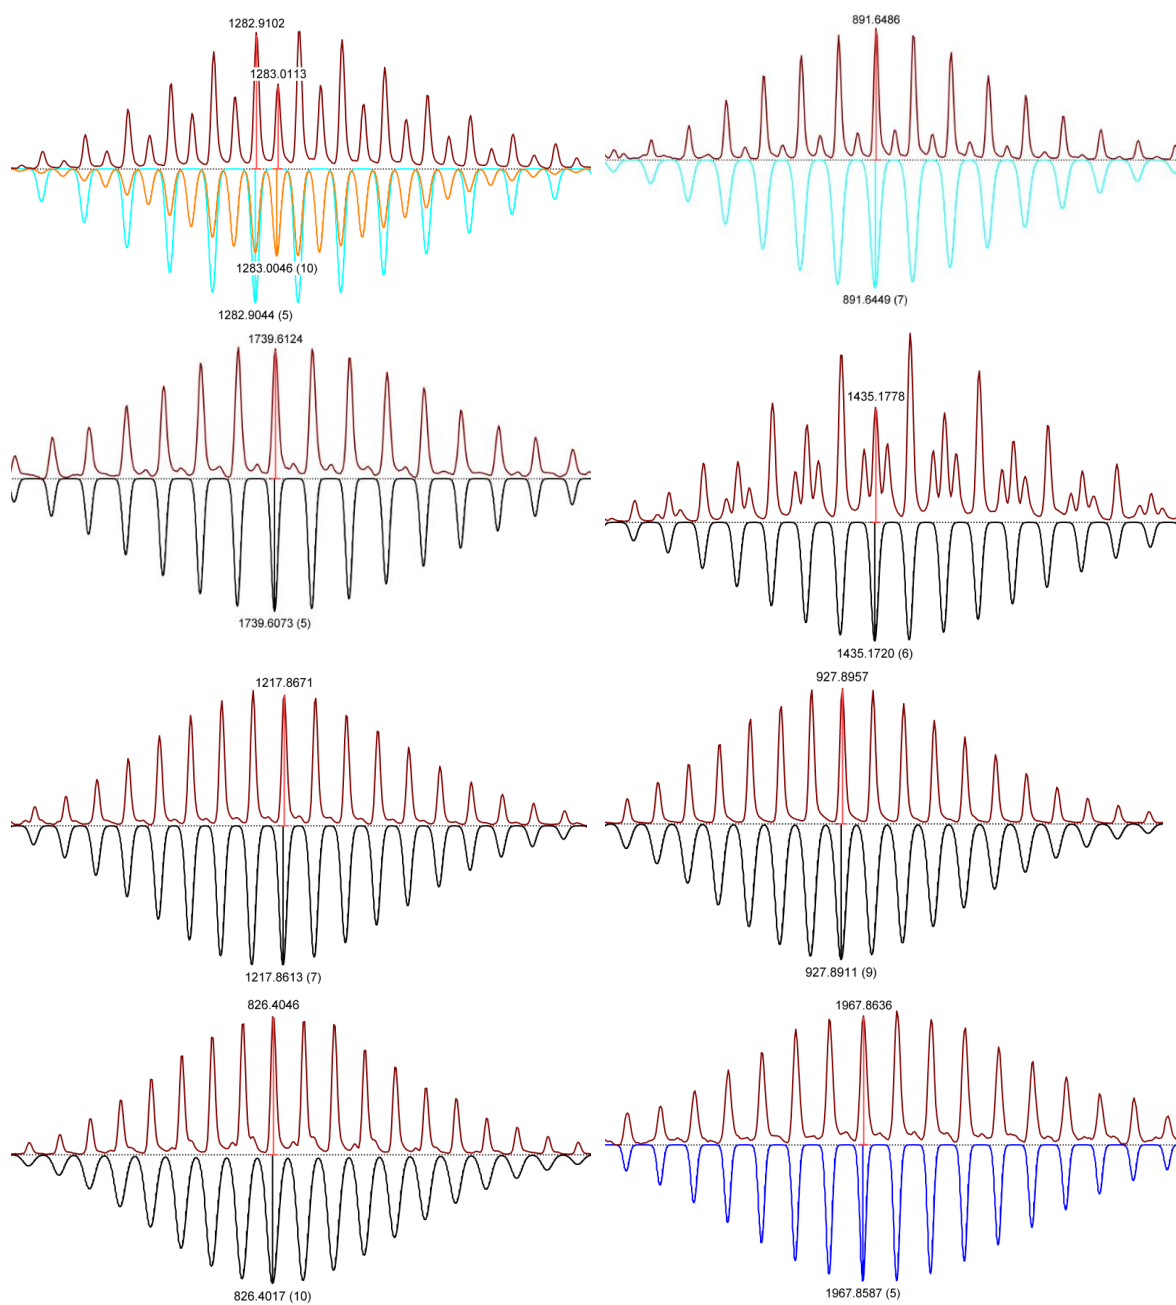

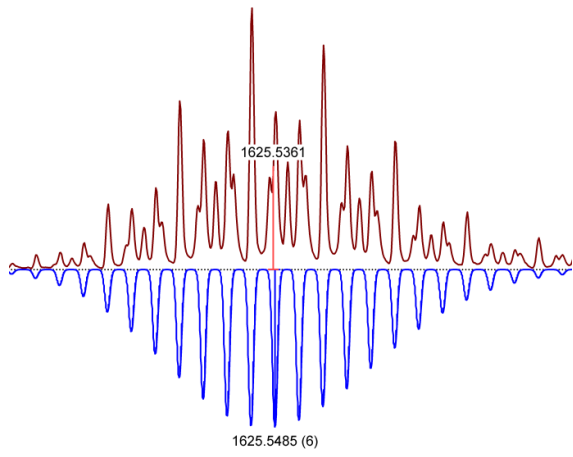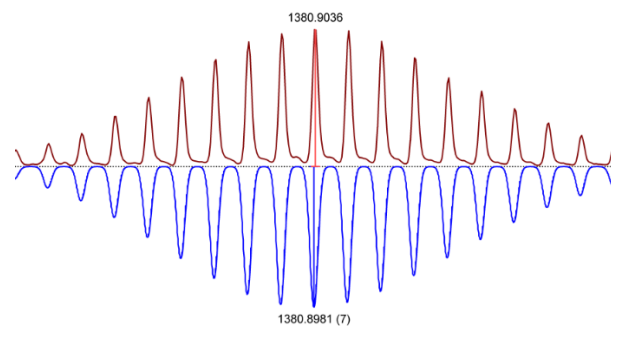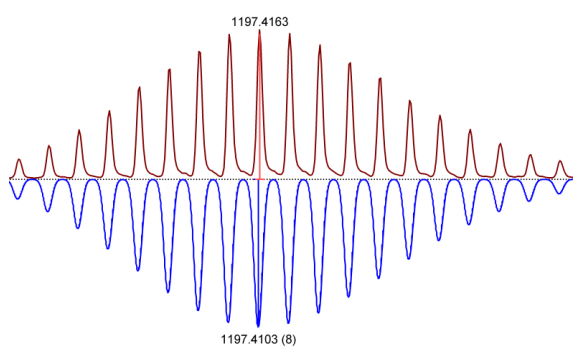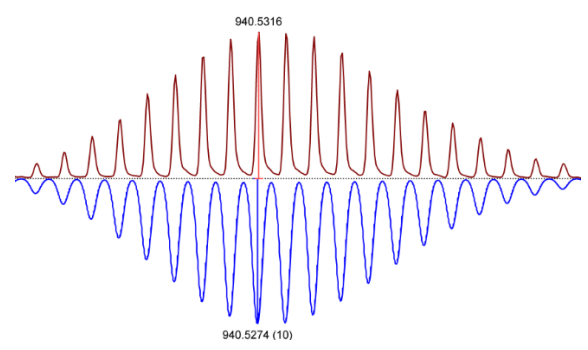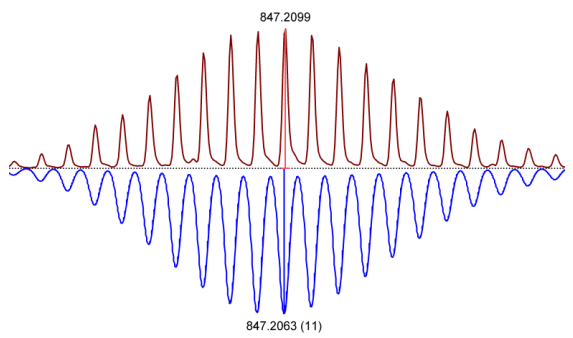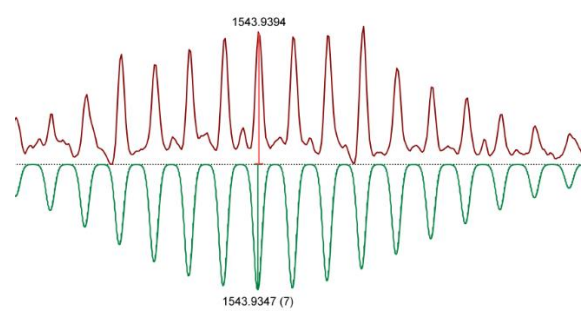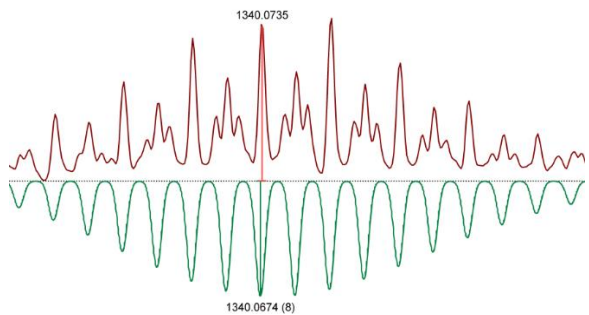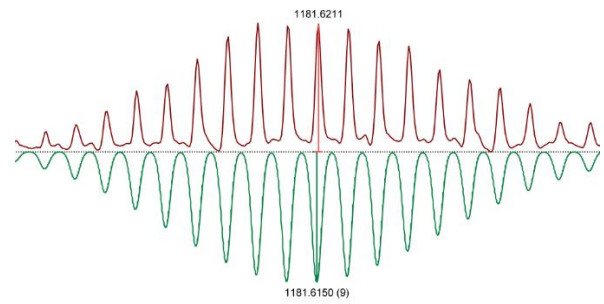

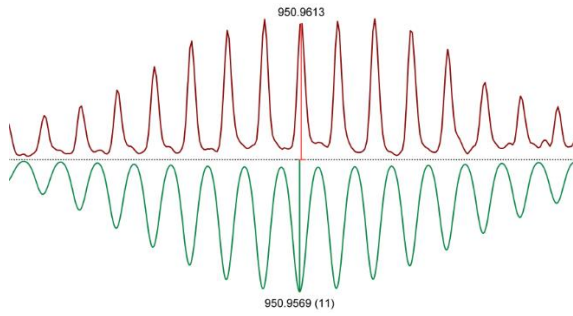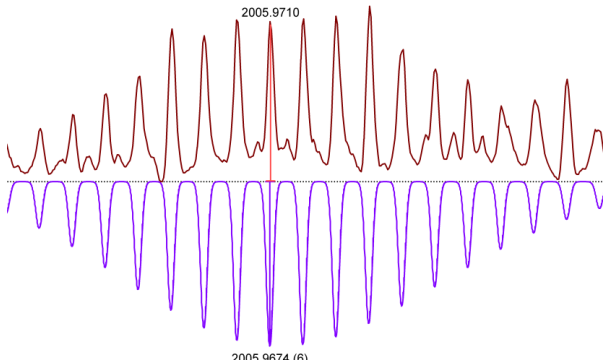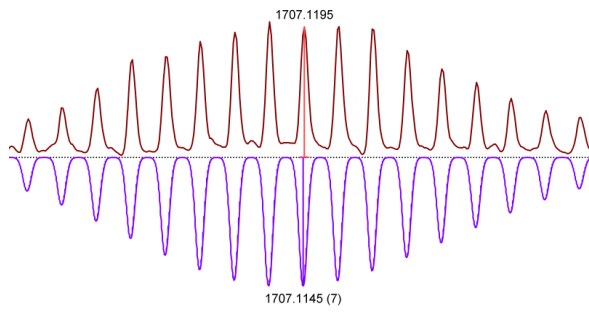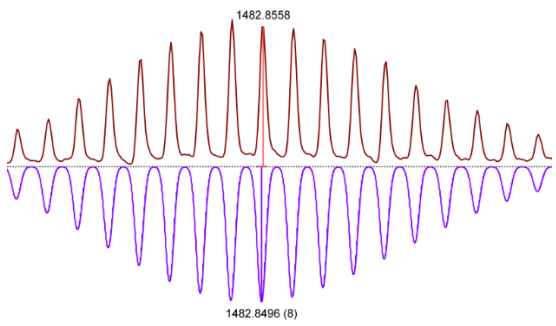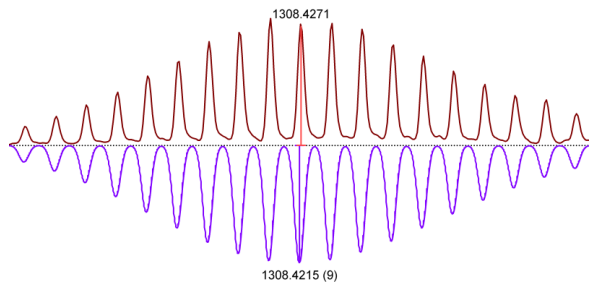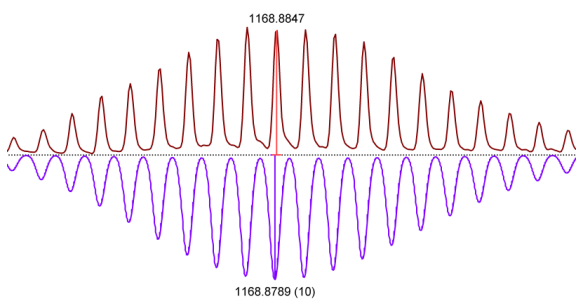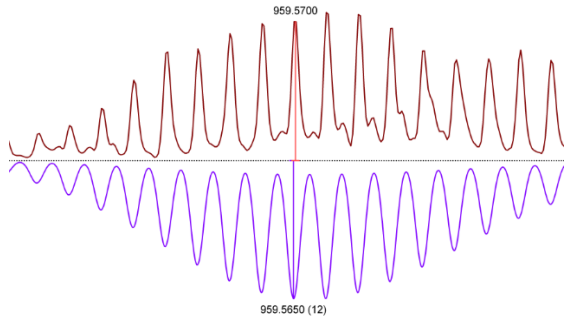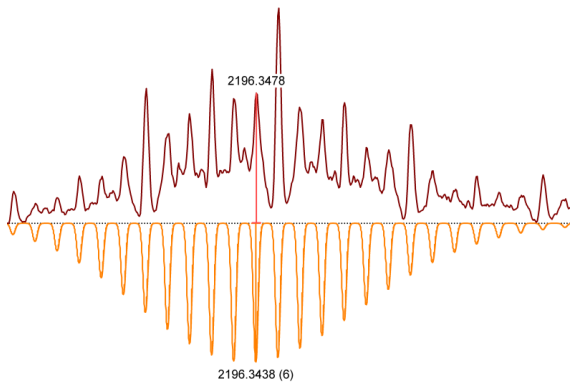

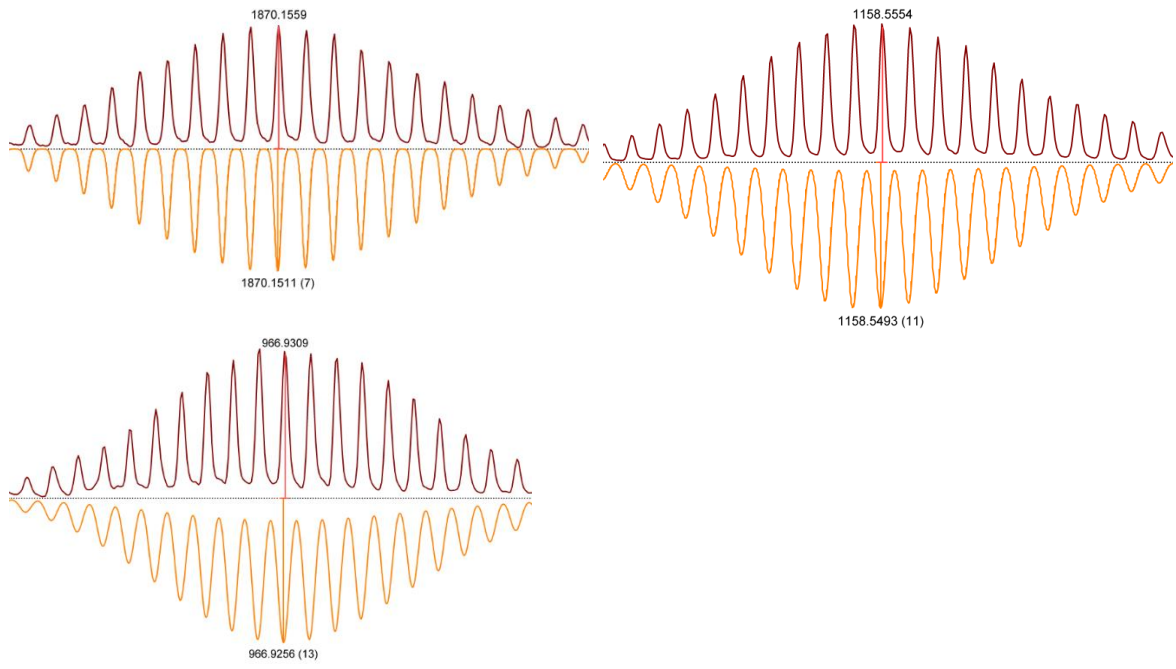

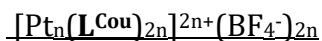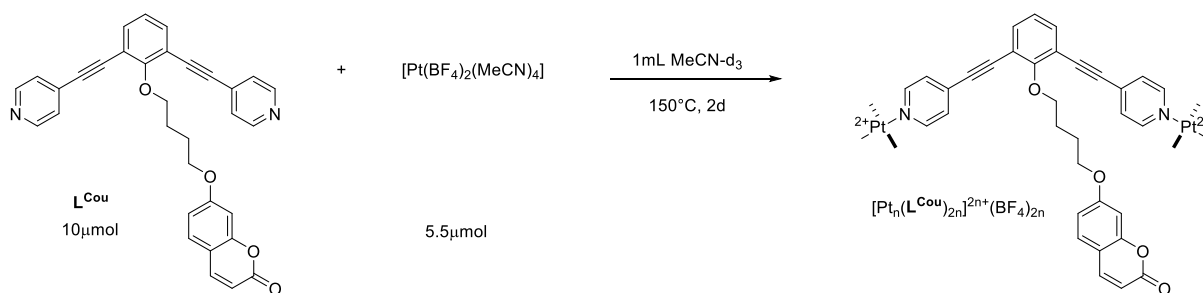

To a solution of  $\text{L}^{\text{Cou}}$  (5.12 mg, 10  $\mu\text{mol}$ , 1 eq.) in 0.5 mL MeCN- $d_3$ ,  $[\text{Pt}(\text{BF}_4)_2(\text{MeCN})_4]$  (2.93 mg, 5.5  $\mu\text{mol}$ , 0.55 eq.) in 0.5 mL MeCN- $d_3$  was added. The solution was then stirred at 150°C for 2d in a 10 mL high pressure tube.  $^1\text{H}$  NMR (400 MHz, Acetonitrile- $d_3$ )  $\delta$  9.16 – 8.79 (m, 4H), 7.83 – 7.49 (m, 7H), 7.43 (dd,  $J = 27.9, 8.8$  Hz, 0H), 7.31 – 7.16 (m, 1H), 6.83 – 6.42 (m, 2H), 6.25 – 6.02 (m, 1H), 4.29 (s, 1H), 4.20 – 3.89 (m, 2H). LogD( $\text{m}^2/\text{s}$ ) at 25°C (MeCN- $d_3$ ): -9.304 ( $d = 2.56$  nm).

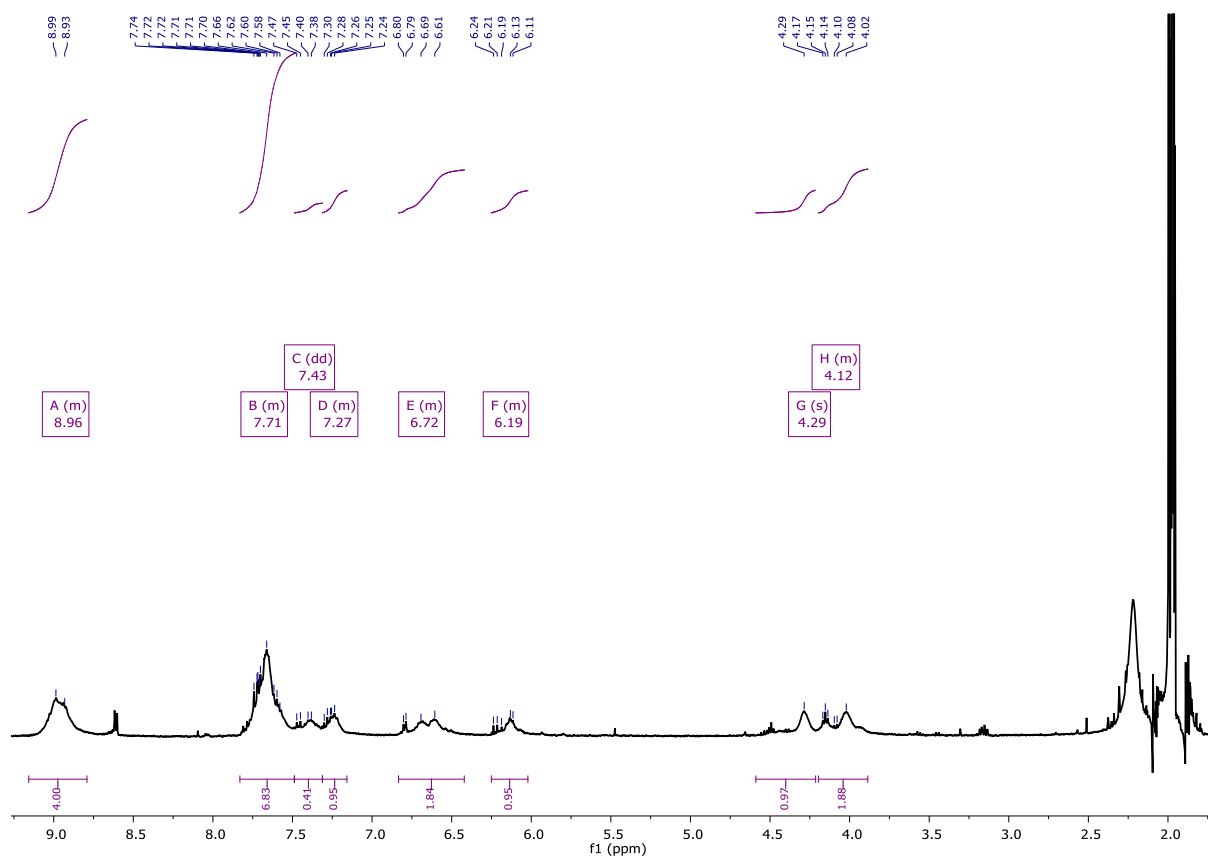

**Figure S39.**  $[\text{Pt}_n(\text{L}^{\text{Cou}})_{2n}]^{2n+}(\text{BF}_4^-)_{2n}$  sphere,  $^1\text{H}$  NMR in MeCN- $d_3$ .

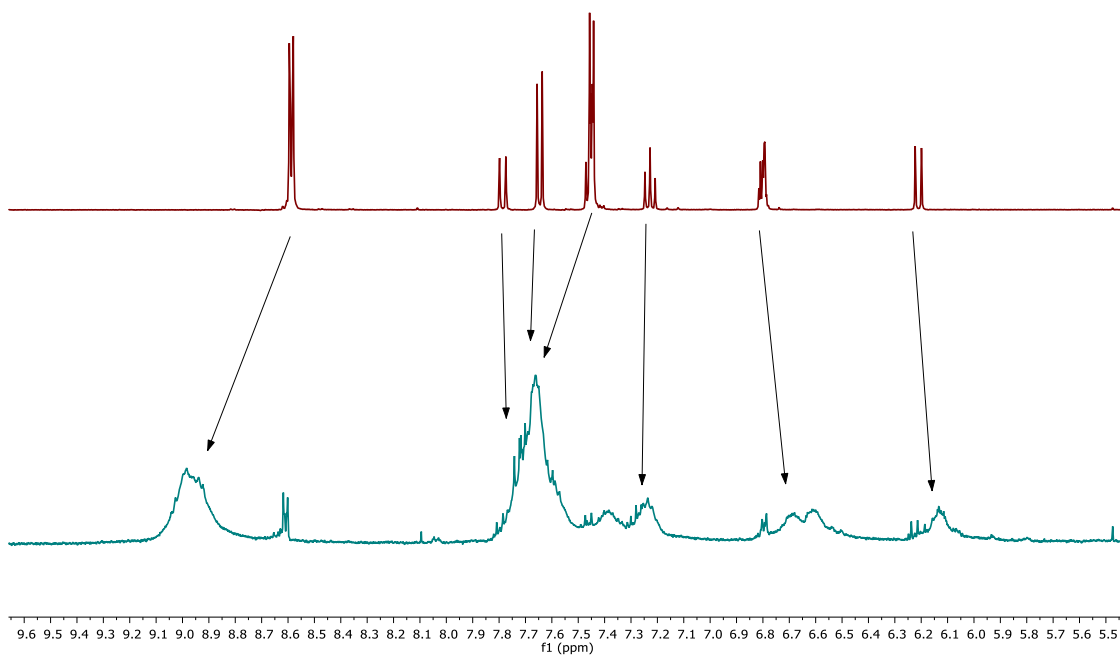

**Figure S40.** Comparison of free  $L^{Cou}$  building block (top) and  $[Pt_n(L^{Cou})_{2n}]^{2n+}(BF_4^-)_{2n}$  sphere (bottom), <sup>1</sup>H NMR in MeCN- $d_3$ .

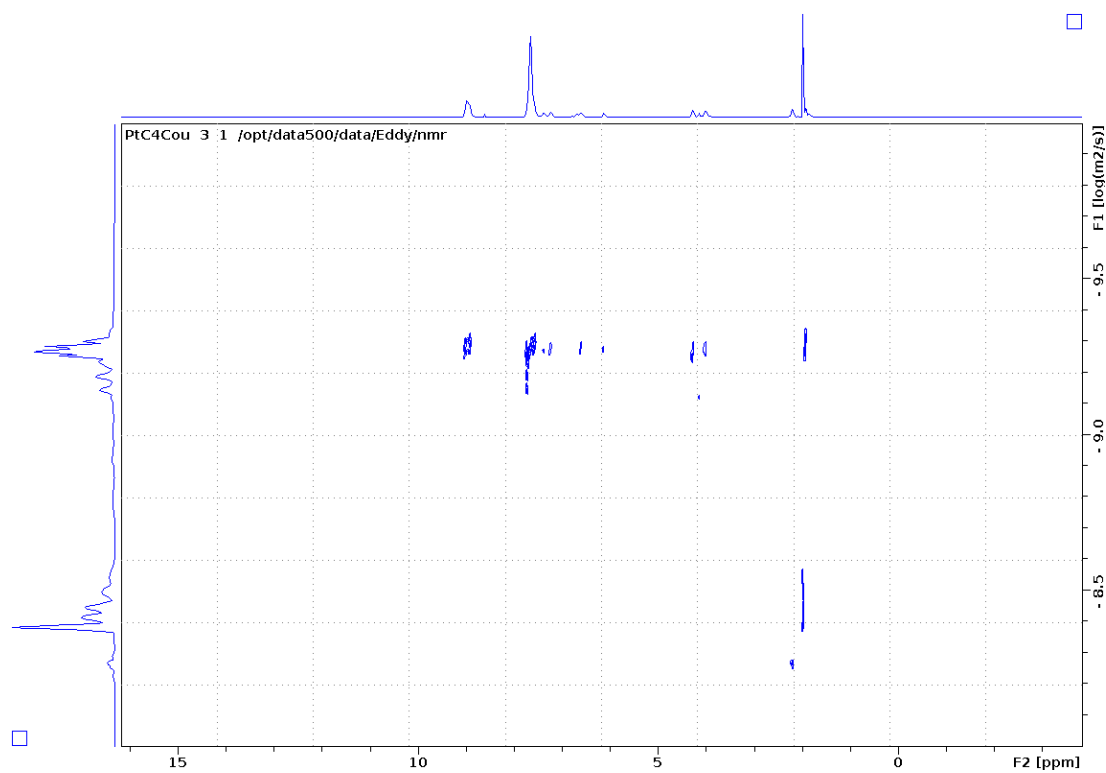

**Figure S41.**  $[Pt_n(L^{Cou})_{2n}]^{2n+}(BF_4^-)_{2n}$  cage prepared at 150°C, DOSY in MeCN- $d_3$  at 25°C.



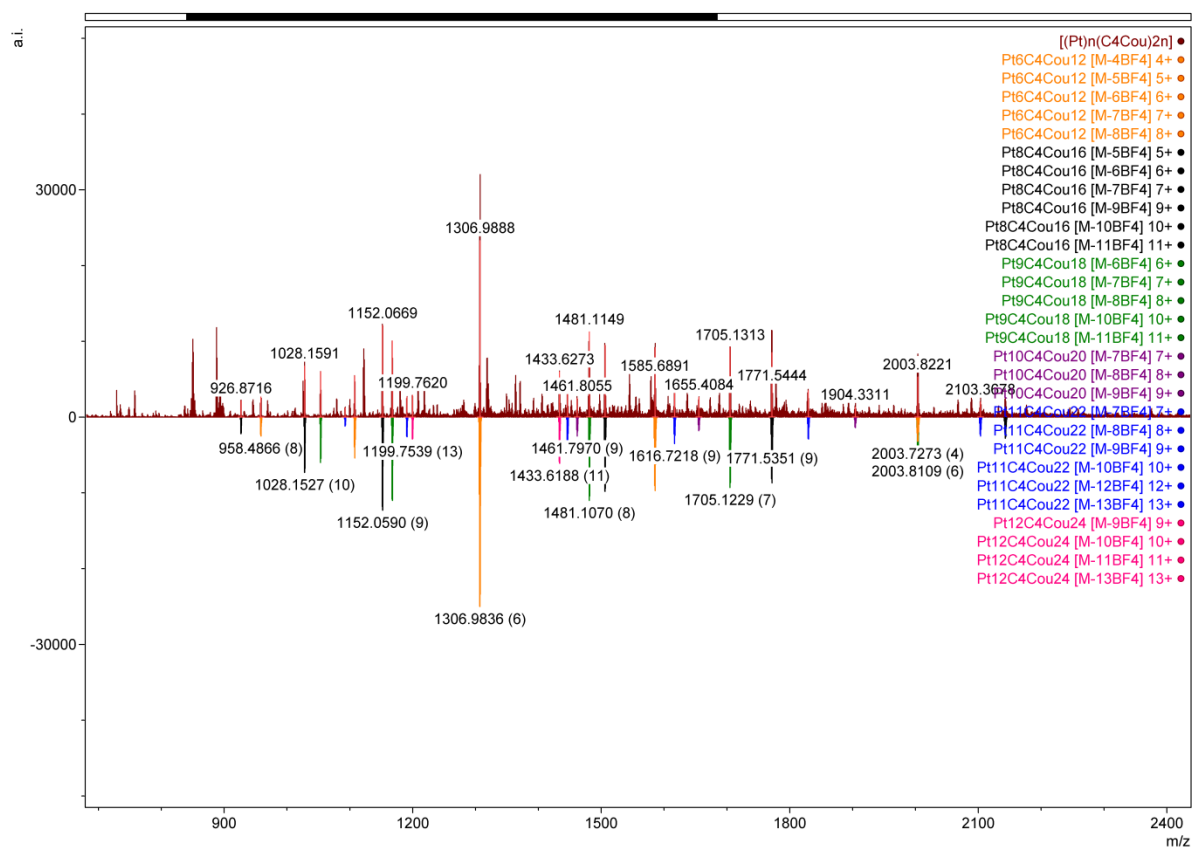

**Figure S42.** Full ESI-MS spectra of  $[Pt_n(L^{Cou})_{2n}]^{2n+}(BF_4^-)_{2n}$  prepared at  $150^\circ C$  for 2d. Below the simulated spectra of different sphere types, above obtained spectra.

**Table S5.** Calculated and observed species of the  $[\text{Pt}_n(\text{LCou})_{2n}]^{2n+}$  assemblies of a sample prepared at 150°C for 2d.

| Cage Type                       | Composition                                                    | Calculated | Found     |
|---------------------------------|----------------------------------------------------------------|------------|-----------|
| M <sub>6</sub> L <sub>12</sub>  | $[\text{Pt}_6(\text{LCou})_{12}(\text{BF}_4^-)_4]^{8+}$        | 958.4866   | 958.4929  |
|                                 | $[\text{Pt}_6(\text{LCou})_{12}(\text{BF}_4^-)_5]^{7+}$        | 1107.8426  | 1107.8498 |
|                                 | $[\text{Pt}_6(\text{LCou})_{12}(\text{BF}_4^-)_6]^{6+}$        | 1306.9836  | 1306.9888 |
|                                 | $[\text{Pt}_6(\text{LCou})_{12}(\text{BF}_4^-)_7]^{5+}$        | 1585.5809  | 1585.5899 |
|                                 | $[\text{Pt}_6(\text{LCou})_{12}(\text{BF}_4^-)_8]^{4+}$        | 2003.7273  | 2003.7320 |
| M <sub>8</sub> L <sub>16</sub>  | $[\text{Pt}_8(\text{LCou})_{16}(\text{BF}_4^-)_5]^{11+}$       | 926.8659   | 926.8716  |
|                                 | $[\text{Pt}_8(\text{LCou})_{16}(\text{BF}_4^-)_6]^{10+}$       | 1028.1527  | 1028.1591 |
|                                 | $[\text{Pt}_8(\text{LCou})_{16}(\text{BF}_4^-)_7]^{9+}$        | 1152.0590  | 1152.0669 |
|                                 | $[\text{Pt}_8(\text{LCou})_{16}(\text{BF}_4^-)_9]^{7+}$        | 1506.0771  | 1506.0859 |
|                                 | $[\text{Pt}_8(\text{LCou})_{16}(\text{BF}_4^-)_{10}]^{6+}$     | 1771.5908  | 1771.5986 |
| M <sub>9</sub> L <sub>18</sub>  | $[\text{Pt}_9(\text{LCou})_{18}(\text{BF}_4^-)_7]^{11+}$       | 1053.5312  | 1053.5382 |
|                                 | $[\text{Pt}_9(\text{LCou})_{18}(\text{BF}_4^-)_8]^{10+}$       | 1167.5849  | 1167.5927 |
|                                 | $[\text{Pt}_9(\text{LCou})_{18}(\text{BF}_4^-)_{10}]^{8+}$     | 1481.1070  | 1481.1149 |
|                                 | $[\text{Pt}_9(\text{LCou})_{18}(\text{BF}_4^-)_{11}]^{7+}$     | 1705.1229  | 1705.1313 |
| M <sub>10</sub> L <sub>20</sub> | $[\text{Pt}_{10}(\text{LCou})_{20}(\text{BF}_4^-)_{11}]^{9+}$  | 1461.7970  | 1461.8055 |
|                                 | $[\text{Pt}_{10}(\text{LCou})_{20}(\text{BF}_4^-)_{12}]^{8+}$  | 1655.3973  | 1655.4084 |
|                                 | $[\text{Pt}_{10}(\text{LCou})_{20}(\text{BF}_4^-)_{13}]^{7+}$  | 1904.3118  | 1904.3311 |
| M <sub>11</sub> L <sub>22</sub> | $[\text{Pt}_{11}(\text{LCou})_{22}(\text{BF}_4^-)_9]^{13+}$    | 1092.4984  | 1092.5063 |
|                                 | $[\text{Pt}_{11}(\text{LCou})_{22}(\text{BF}_4^-)_{10}]^{12+}$ | 1190.7902  | 1190.7980 |
|                                 | $[\text{Pt}_{11}(\text{LCou})_{22}(\text{BF}_4^-)_{12}]^{10+}$ | 1446.3491  | 1446.3590 |
|                                 | $[\text{Pt}_{11}(\text{LCou})_{22}(\text{BF}_4^-)_{13}]^{9+}$  | 1616.7218  | 1616.7333 |
|                                 | $[\text{Pt}_{11}(\text{LCou})_{22}(\text{BF}_4^-)_{14}]^{8+}$  | 1829.5623  | 1829.5700 |
|                                 | $[\text{Pt}_{11}(\text{LCou})_{22}(\text{BF}_4^-)_{15}]^{7+}$  | 2103.3576  | 2103.3678 |
| M <sub>12</sub> L <sub>24</sub> | $[\text{Pt}_{12}(\text{LCou})_{24}(\text{BF}_4^-)_{11}]^{13+}$ | 1199.7539  | 1199.7620 |
|                                 | $[\text{Pt}_{12}(\text{LCou})_{24}(\text{BF}_4^-)_{13}]^{11+}$ | 1433.6188  | 1433.6273 |

**Table S6.** Zoom into different charged species of  $[\text{Pt}_n(\text{L}^{\text{Cou}})_{2n}]^{2n+}$  assemblies of a sample prepared at 150°C for 2d.

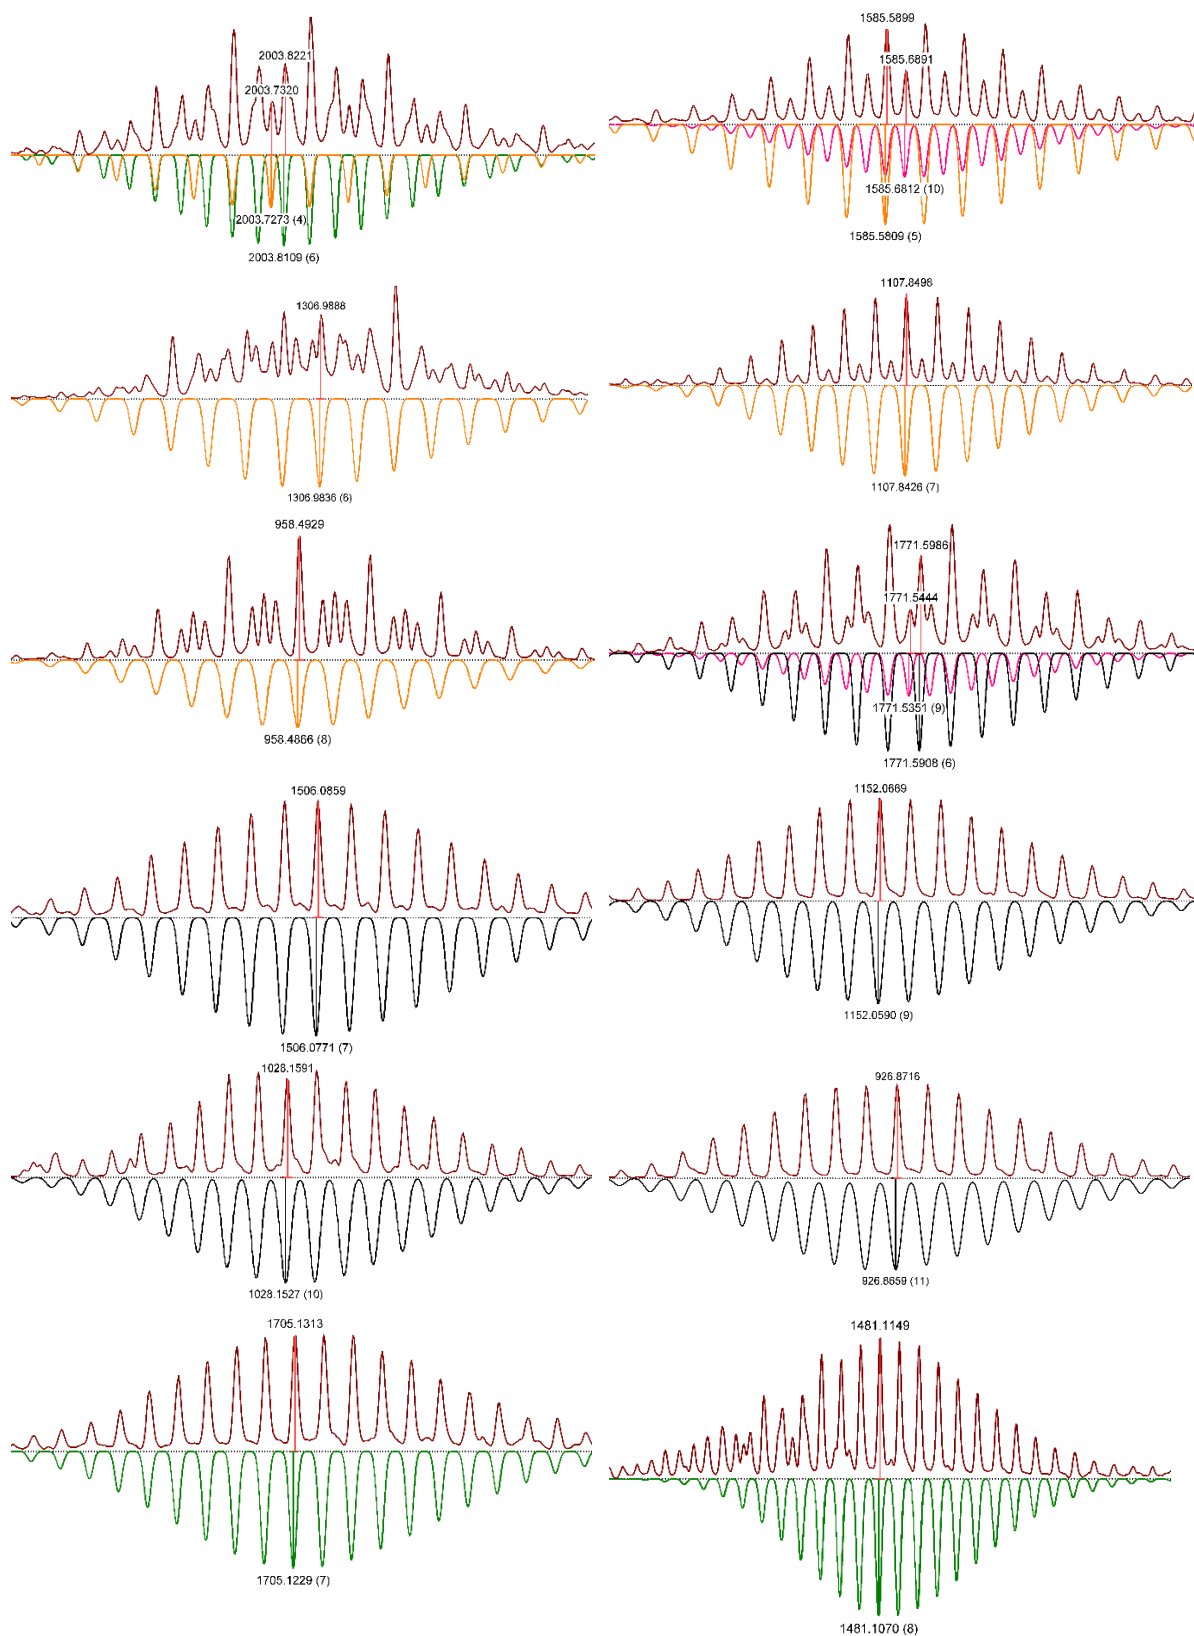

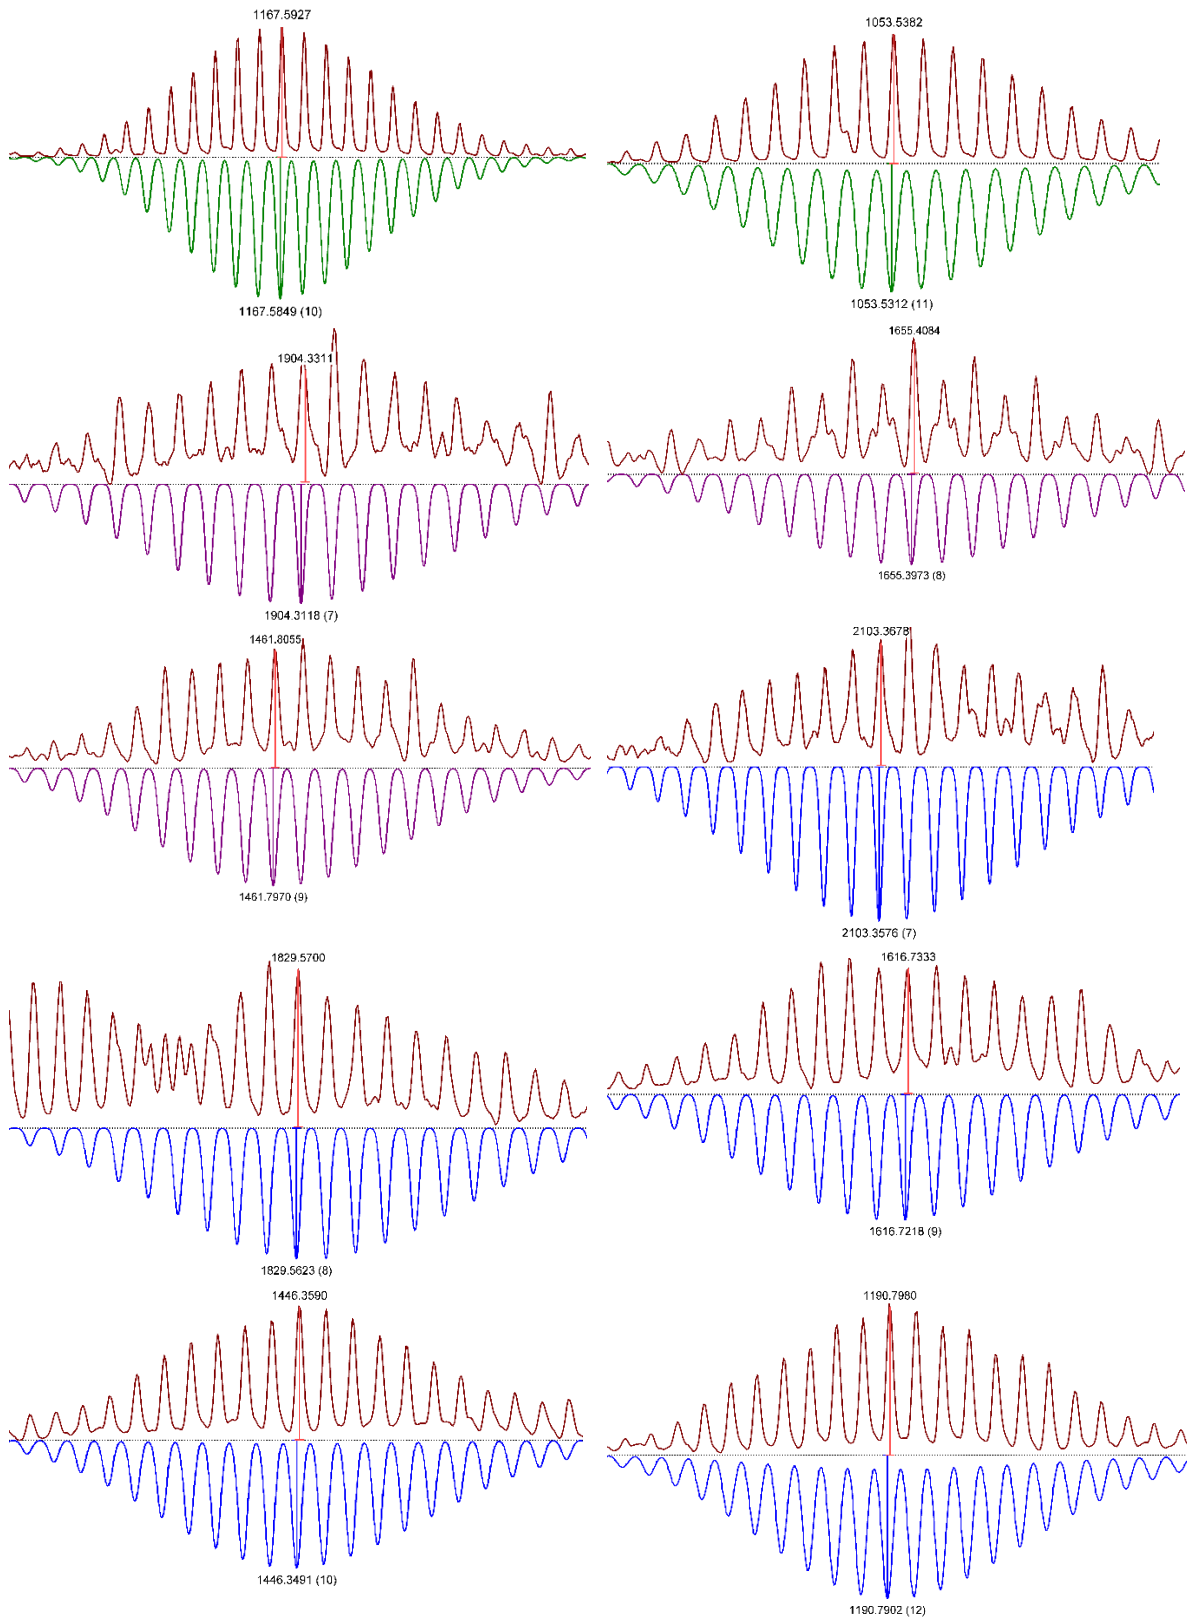

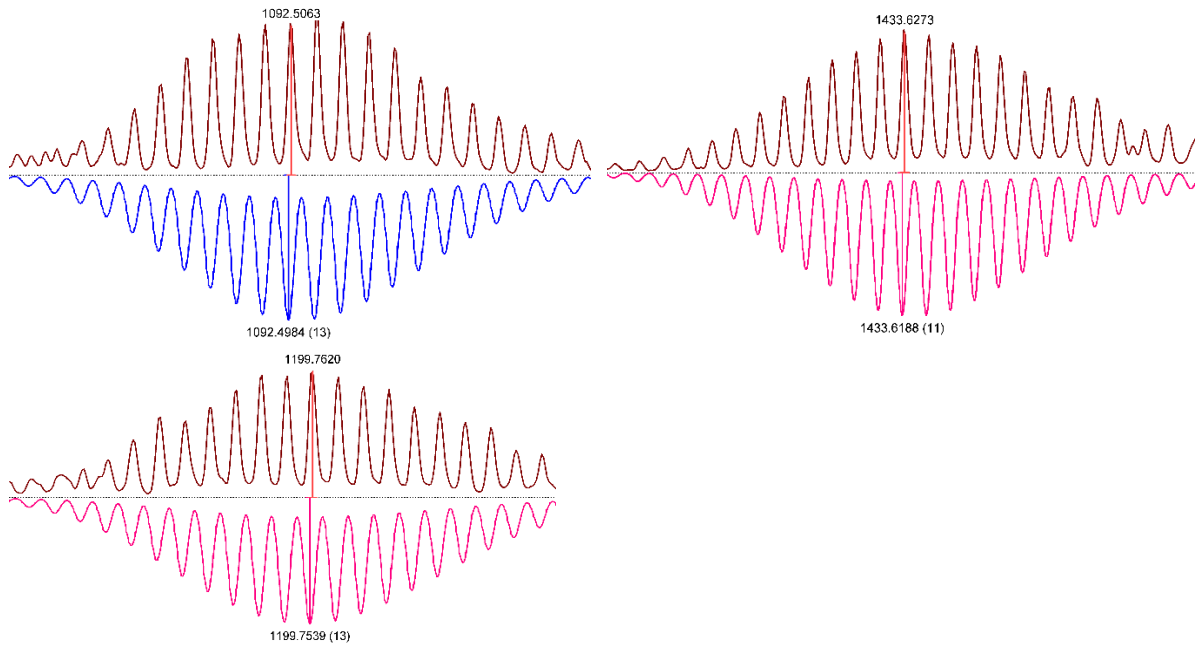

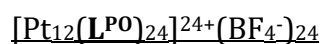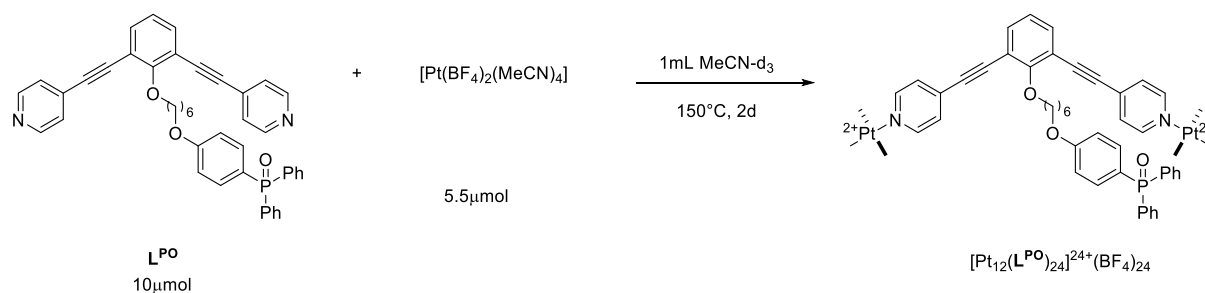

To a solution of  $\text{L}^{\text{PO}}$  (6.72 mg, 10  $\mu\text{mol}$ , 1 eq.) in 0.5 mL MeCN- $d_3$ ,  $[\text{Pt}(\text{BF}_4)_2(\text{MeCN})_4]$  (2.93 mg, 5.5  $\mu\text{mol}$ , 0.55 eq.) in 0.5 mL MeCN- $d_3$  was added. The solution was then stirred at 150°C for 2d in a 10 mL high pressure tube.  $^1\text{H}$  NMR (400 MHz, Acetonitrile- $d_3$ )  $\delta$  9.22 – 8.80 (m, 4H), 7.88 – 7.26 (m, 23H), 7.26 – 7.10 (m, 0H), 4.35 – 4.05 (m, 1H), 3.96 – 3.73 (m, 2H).  $^{13}\text{C}$  NMR (101 MHz,  $\text{CD}_3\text{CN}$ )  $\delta$  172.08, 162.00, 151.76, 141.61, 137.67, 135.47, 133.86, 133.68, 131.59, 128.66, 126.71, 115.51, 114.69, 95.14, 89.33, 75.41, 67.92, 30.05, 28.54, 25.54, 21.01, 20.25. LogD( $\text{m}^2/\text{s}$ ) at 25°C (MeCN- $d_3$ ): -9.569 ( $d = 4.72$  nm).

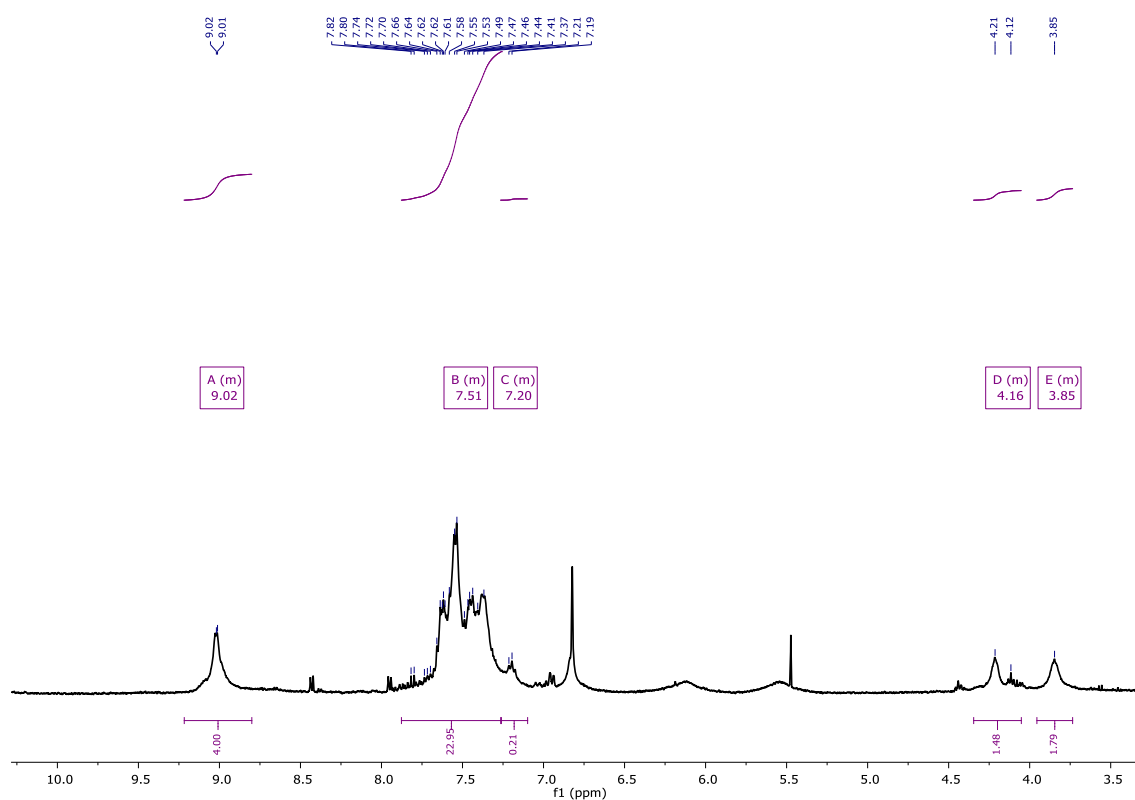

**Figure S43.**  $[\text{Pt}_{12}(\text{L}^{\text{PO}})_{24}]^{24+}(\text{BF}_4^-)_{24}$  sphere,  $^1\text{H}$  NMR in MeCN- $d_3$ .

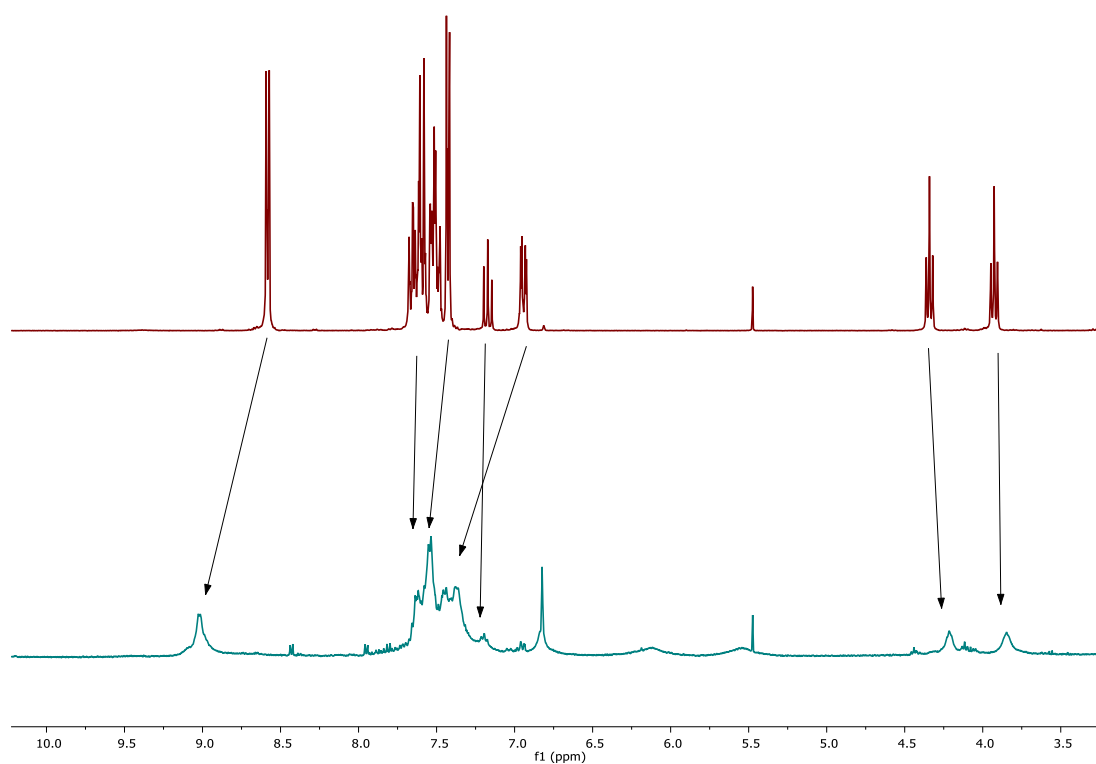

**Figure S44.** Comparison of free  $\text{L}^{\text{PO}}$  building block (top) and  $[\text{Pt}_{12}(\text{L}^{\text{PO}})_{24}]^{24+}(\text{BF}_4^-)_{24}$  sphere (bottom),  $^1\text{H}$  NMR in  $\text{MeCN-d}_3$ .

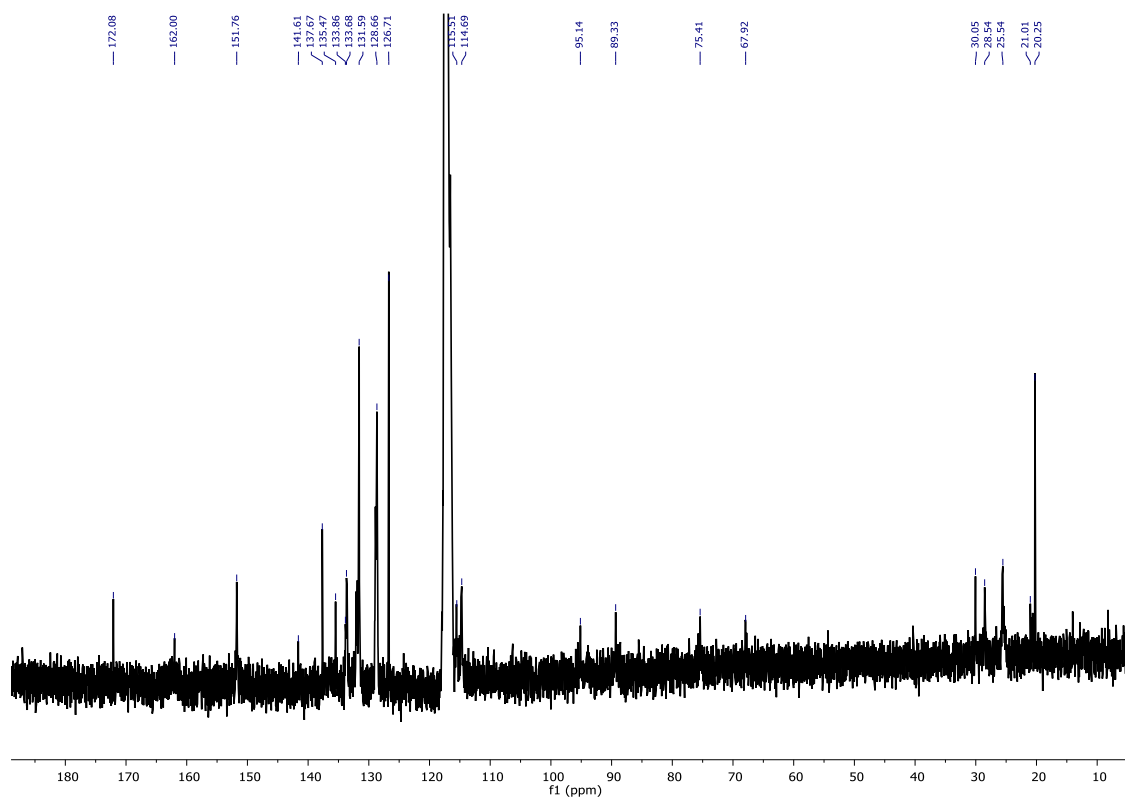

**Figure S45.**  $[\text{Pt}_{12}(\text{L}^{\text{PO}})_{24}]^{24+}(\text{BF}_4^-)_{24}$  sphere,  $^{13}\text{C}$  NMR in  $\text{MeCN-d}_3$ .

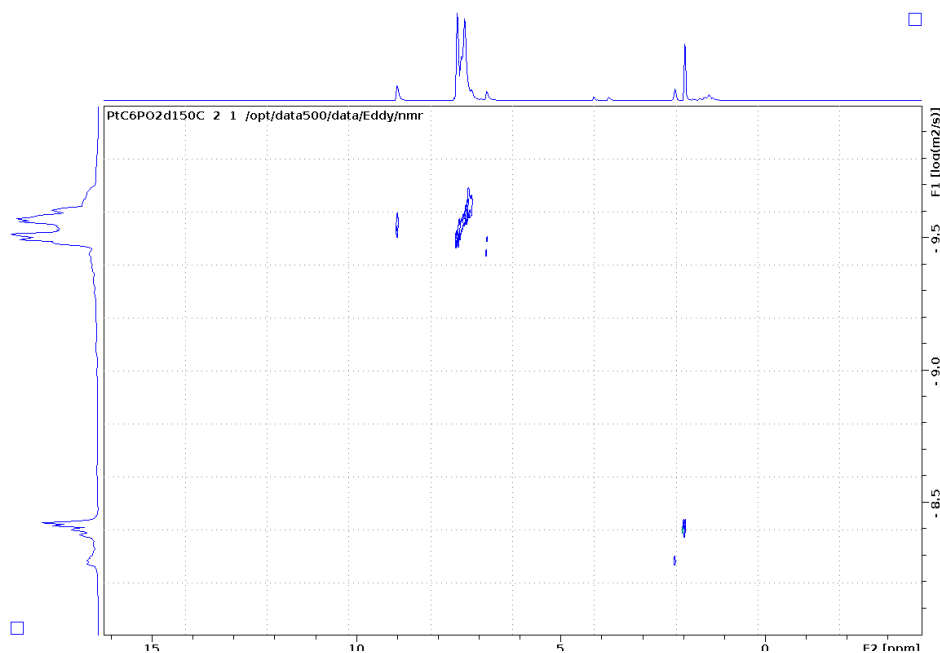

**Figure S46.**  $[\text{Pt}_{12}(\text{L}^{\text{PO}})_{24}]^{24+}(\text{BF}_4^-)_{24}$  cage prepared at 150°C, DOSY in MeCN- $d_3$  at 25°C.

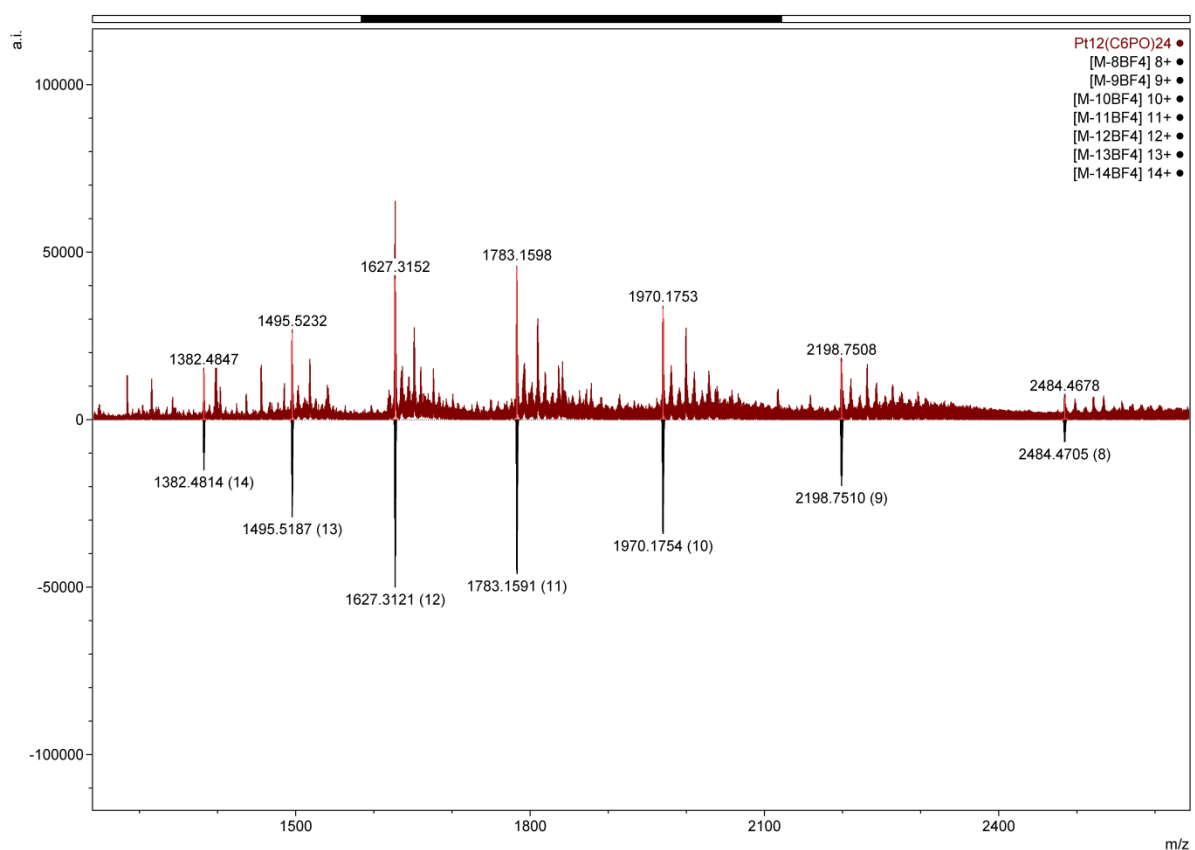

**Figure S47.** Full ESI-MS spectra of  $[\text{Pt}_{12}(\text{L}^{\text{PO}})_{24}]^{24+}(\text{BF}_4^-)_{24}$  prepared at 150°C for 2d. Below the simulated spectra, above obtained spectra. All visible extra signals can be attributed to  $\text{Pt}_{12}\text{L}_{24}$  assemblies with different amounts of solvent trapped in them due to the hydrogen bonding with PO.



**Table S7.** Calculated and observed species of the  $[\text{Pt}_{12}(\text{L}^{\text{P}^{\text{O}}})_{24}]^{24+}$  assembly prepared at 150°C for 2d.

| Formula                                                                           | calculated | obtained  |
|-----------------------------------------------------------------------------------|------------|-----------|
| $[\text{Pt}_{12}(\text{L}^{\text{P}^{\text{O}}})_{24}(\text{BF}_4^-)_{16}]^{8+}$  | 2484.4705  | 2484.4678 |
| $[\text{Pt}_{12}(\text{L}^{\text{P}^{\text{O}}})_{24}(\text{BF}_4^-)_{15}]^{9+}$  | 2198.7510  | 2198.7508 |
| $[\text{Pt}_{12}(\text{L}^{\text{P}^{\text{O}}})_{24}(\text{BF}_4^-)_{14}]^{10+}$ | 1970.1754  | 1970.1753 |
| $[\text{Pt}_{12}(\text{L}^{\text{P}^{\text{O}}})_{24}(\text{BF}_4^-)_{13}]^{11+}$ | 1783.1591  | 1783.1598 |
| $[\text{Pt}_{12}(\text{L}^{\text{P}^{\text{O}}})_{24}(\text{BF}_4^-)_{12}]^{12+}$ | 1627.3121  | 1627.3152 |
| $[\text{Pt}_{12}(\text{L}^{\text{P}^{\text{O}}})_{24}(\text{BF}_4^-)_{11}]^{13+}$ | 1495.5187  | 1495.5232 |
| $[\text{Pt}_{12}(\text{L}^{\text{P}^{\text{O}}})_{24}(\text{BF}_4^-)_{10}]^{14+}$ | 1382.4814  | 1382.4847 |

**Table S8.** Zoom into different charged species of  $[\text{Pt}_{12}(\text{L}^{\text{P}^{\text{O}}})_{24}]^{24+}$  assembly of a sample prepared at 150°C for 2d.

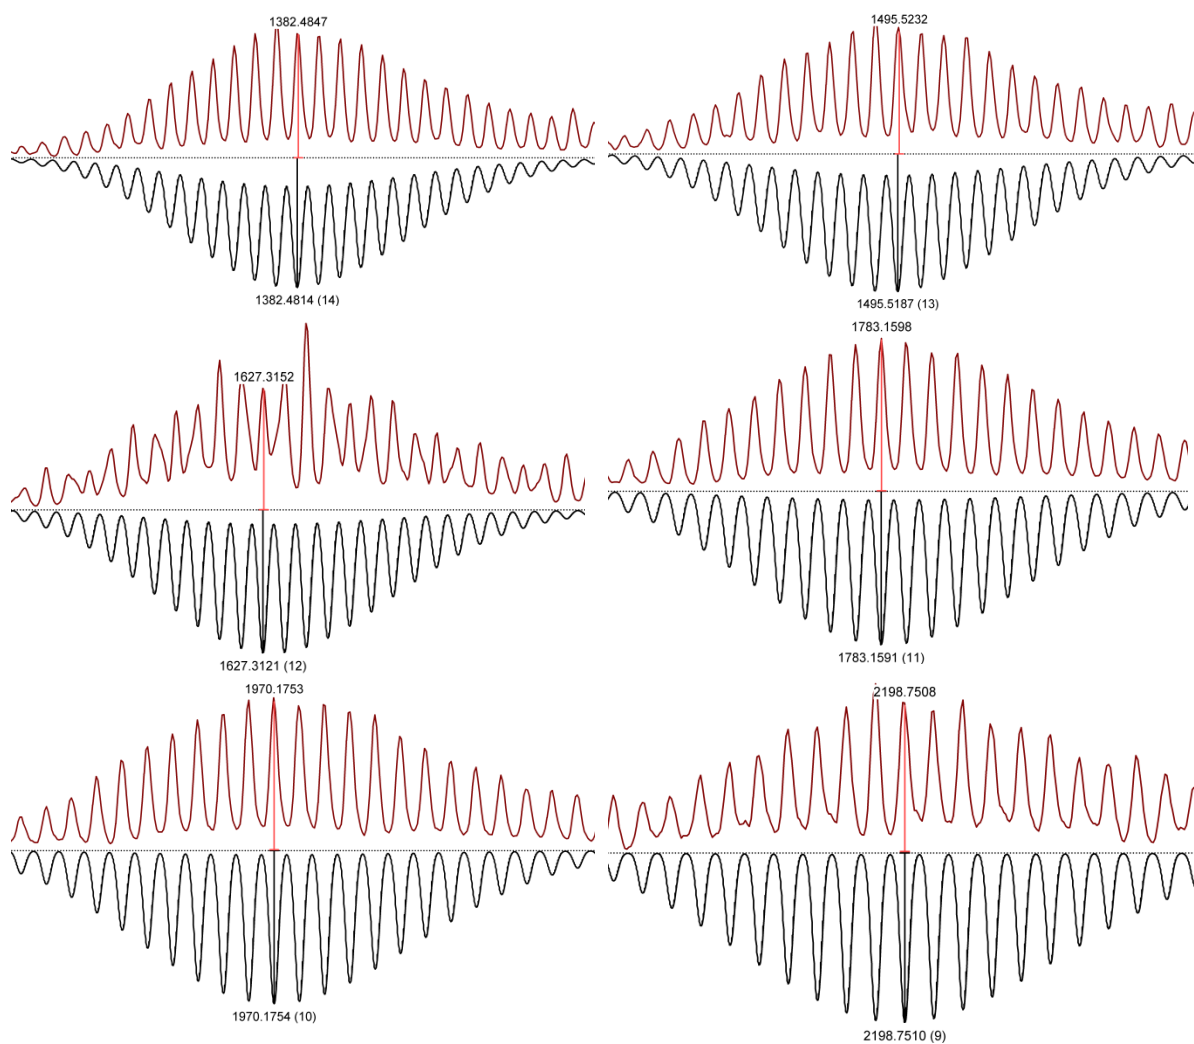

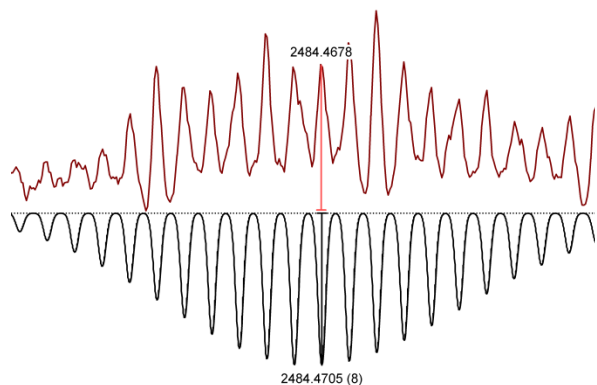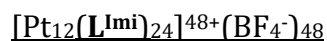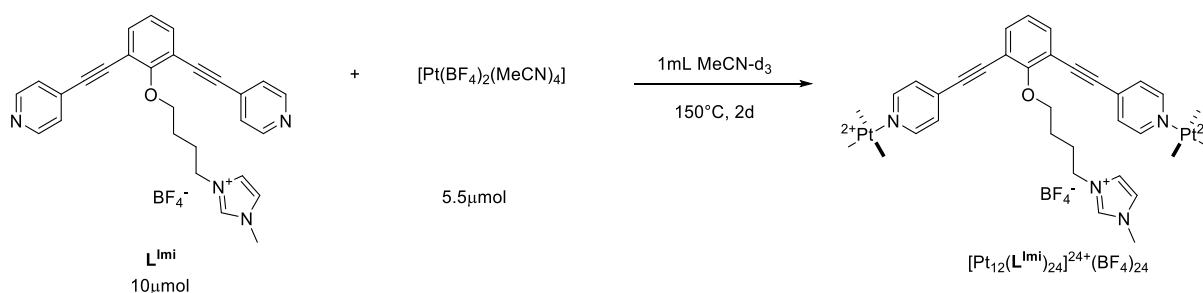

To a solution of  $\text{L}^{\text{Imi}}$  (5.20 mg, 10  $\mu\text{mol}$ , 1 eq.) in 0.5 mL MeCN- $d_3$ ,  $[\text{Pt}(\text{BF}_4)_2(\text{MeCN})_4]$  (2.93 mg, 5.5  $\mu\text{mol}$ , 0.55 eq.) in 0.5 mL MeCN- $d_3$  was added. The solution was then stirred at 150°C for 2d in a 10 mL high pressure tube.  $^1\text{H}$  NMR (400 MHz, Acetonitrile- $d_3$ )  $\delta$  8.99 (d,  $J = 6.6$  Hz, 4H), 8.61 (s, 1H), 7.70 (d,  $J = 7.8$  Hz, 1H), 7.65 (d,  $J = 6.1$  Hz, 3H), 7.57 – 7.42 (m, 1H), 7.26 (t,  $J = 7.8$  Hz, 1H), 4.40 – 4.19 (m, 7H), 3.89 (s, 3H).  $^{13}\text{C}$  NMR (101 MHz,  $\text{CD}_3\text{CN}$ )  $\delta$  151.84, 137.67, 136.36, 135.41, 129.04, 126.71, 123.76, 122.33, 115.74, 94.64, 89.45, 74.59, 49.25, 35.84, 26.75, 20.26.  $^{19}\text{F}$  NMR (282 MHz,  $\text{CDCl}_3$ )  $\delta$  -148.48, -148.53. LogD( $\text{m}^2/\text{s}$ ) at 25°C (MeCN- $d_3$ ): -9.459 (d = 3.66 nm).

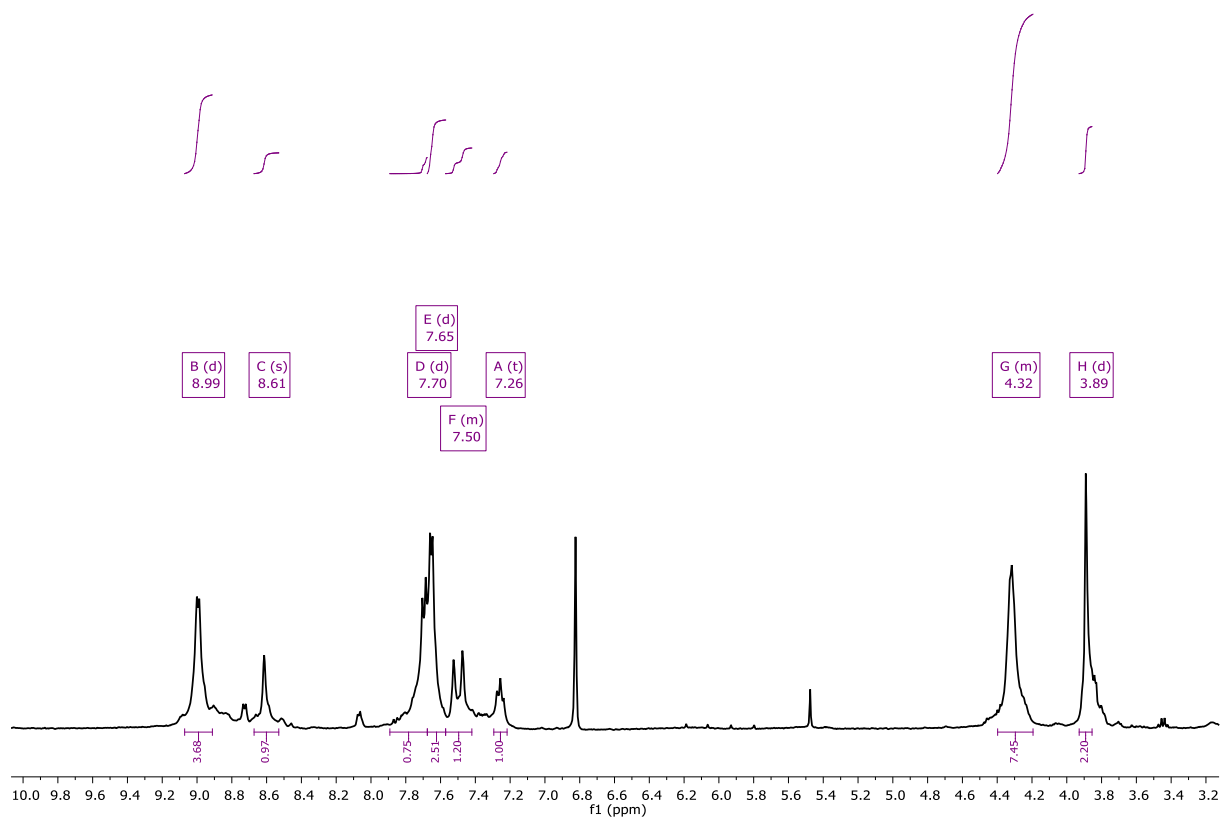

**Figure S48.**  $[\text{Pt}_{12}(\text{L}^{\text{imi}})_{24}]^{24+}(\text{BF}_4^-)_{24}$  sphere,  $^1\text{H}$  NMR in  $\text{MeCN-d}_3$ .

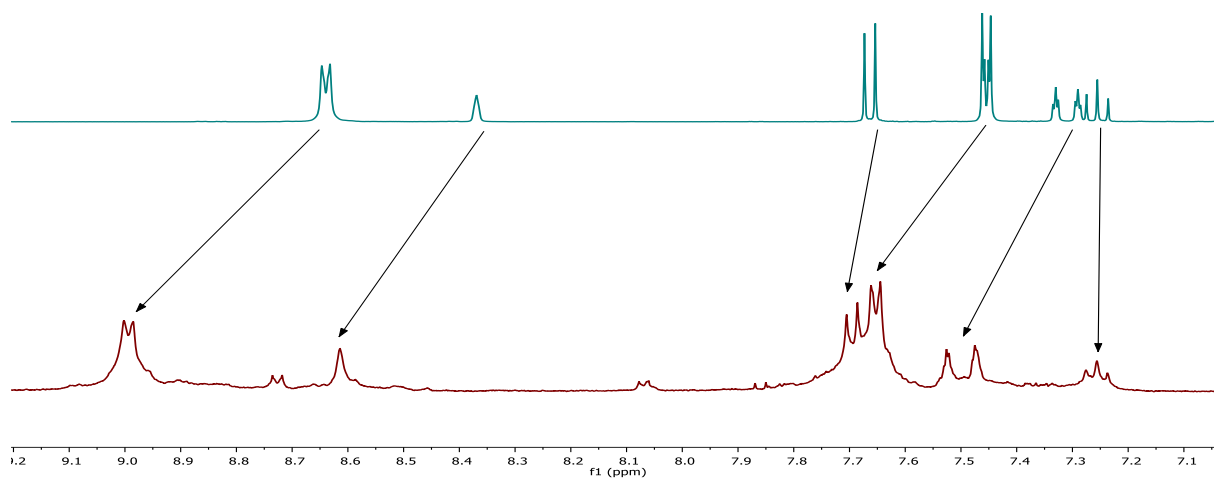

**Figure S49.** Comparison of free  $\text{L}^{\text{imi}}$  building block (top) and  $[\text{Pt}_{12}(\text{L}^{\text{imi}})_{24}]^{24+}(\text{BF}_4^-)_{24}$  sphere (bottom),  $^1\text{H}$  NMR in  $\text{MeCN-d}_3$ .

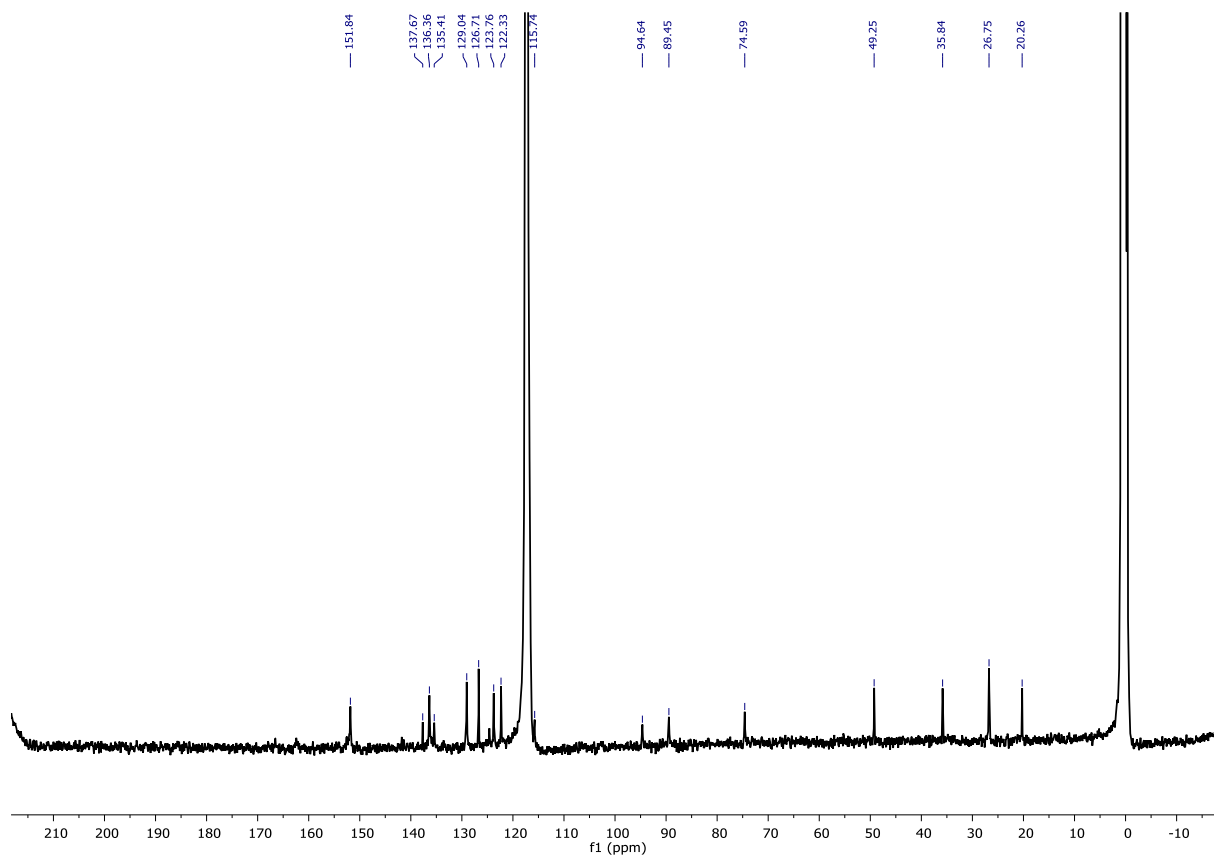

**Figure S50.**  $[\text{Pt}_{12}(\text{L}^{\text{imi}})_{24}]^{24+}(\text{BF}_4^-)_{24}$  sphere,  $^{13}\text{C}$  NMR in  $\text{MeCN-d}_3$ .

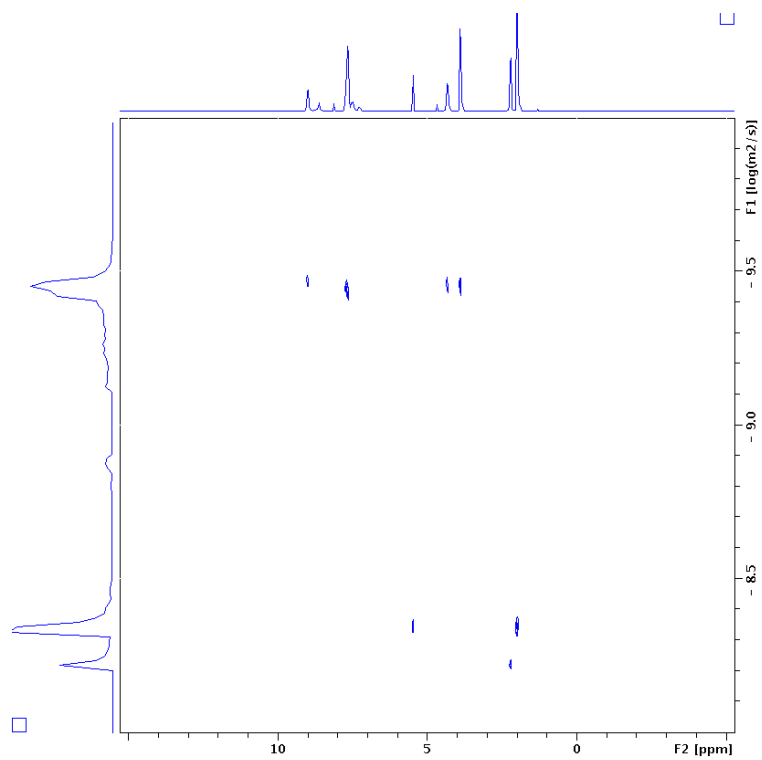

**Figure S51.**  $[\text{Pt}_{12}(\text{L}^{\text{imi}})_{24}]^{48+}(\text{BF}_4^-)_{48}$  cage prepared at  $150^\circ\text{C}$ , DOSY in  $\text{MeCN-d}_3$  at  $25^\circ\text{C}$ .

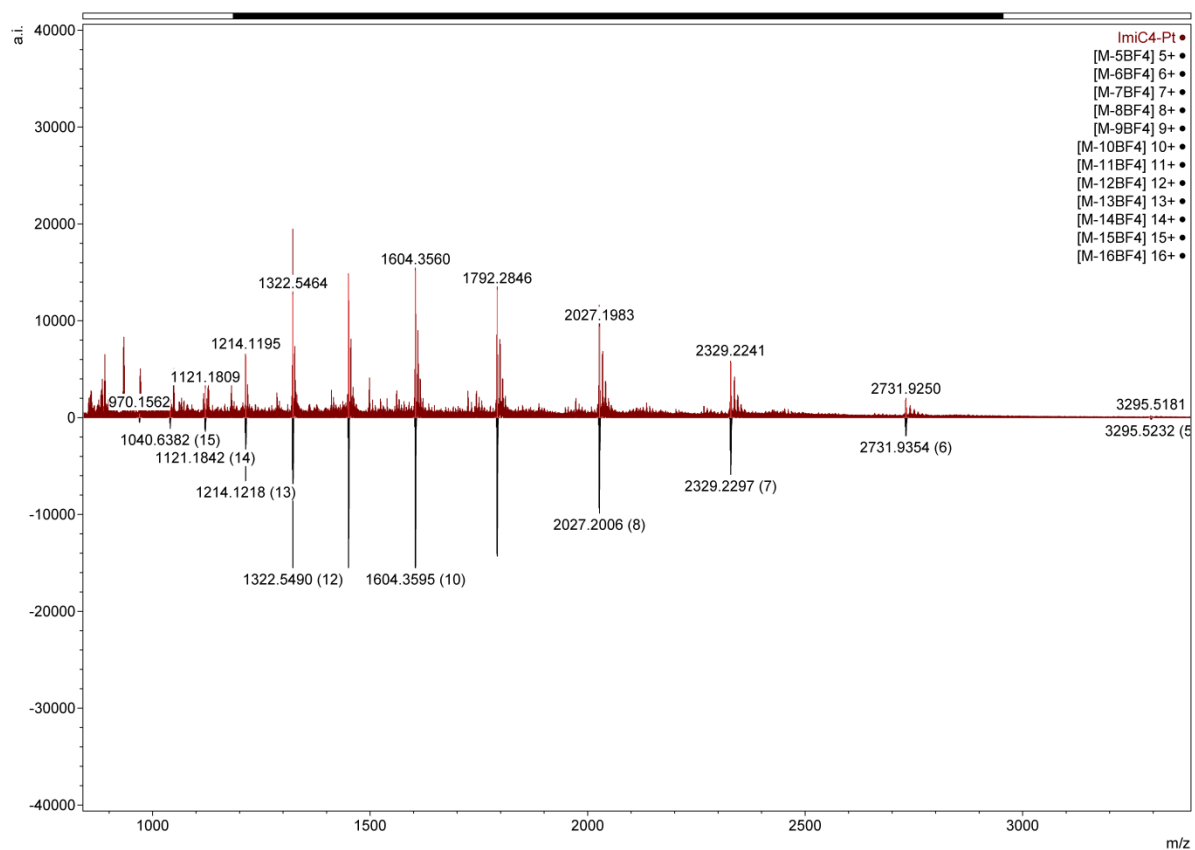

**Figure S52.** Full ESI-MS spectra of  $[\text{Pt}_{12}(\text{LImi})_{24}]^{48+}(\text{BF}_4^-)_{48}$  prepared at  $150^\circ\text{C}$  for 2d. Below the simulated spectra, above obtained spectra.

**Table S9.** Calculated and observed species of the  $[\text{Pt}_{12}(\text{LImi})_{24}]^{48+}$  assembly prepared at  $150^\circ\text{C}$  for 2d.

| Formula                                                         | calculated | obtained  |
|-----------------------------------------------------------------|------------|-----------|
| $[\text{Pt}_{12}(\text{C4IMI})_{24}(\text{BF}_4^-)_{43}]^{5+}$  | 3295.5232  | 3295.5181 |
| $[\text{Pt}_{12}(\text{C4IMI})_{24}(\text{BF}_4^-)_{42}]^{6+}$  | 2731.9354  | 2731.9250 |
| $[\text{Pt}_{12}(\text{C4IMI})_{24}(\text{BF}_4^-)_{41}]^{7+}$  | 2329.2297  | 2329.2241 |
| $[\text{Pt}_{12}(\text{C4IMI})_{24}(\text{BF}_4^-)_{40}]^{8+}$  | 2027.2006  | 2027.1983 |
| $[\text{Pt}_{12}(\text{C4IMI})_{24}(\text{BF}_4^-)_{39}]^{9+}$  | 1792.2888  | 1792.2846 |
| $[\text{Pt}_{12}(\text{C4IMI})_{24}(\text{BF}_4^-)_{38}]^{10+}$ | 1604.3595  | 1604.3560 |
| $[\text{Pt}_{12}(\text{C4IMI})_{24}(\text{BF}_4^-)_{37}]^{11+}$ | 1450.6902  | 1450.6878 |
| $[\text{Pt}_{12}(\text{C4IMI})_{24}(\text{BF}_4^-)_{36}]^{12+}$ | 1322.5490  | 1322.5464 |
| $[\text{Pt}_{12}(\text{C4IMI})_{24}(\text{BF}_4^-)_{35}]^{13+}$ | 1214.1218  | 1214.1195 |
| $[\text{Pt}_{12}(\text{C4IMI})_{24}(\text{BF}_4^-)_{34}]^{14+}$ | 1121.1842  | 1121.1809 |

**Table S10.** Zoom into different charged species of  $[\text{Pt}_{12}(\text{L}^{\text{Im}})_{24}]^{24+}$  assembly of a sample prepared at 150°C for 2d.

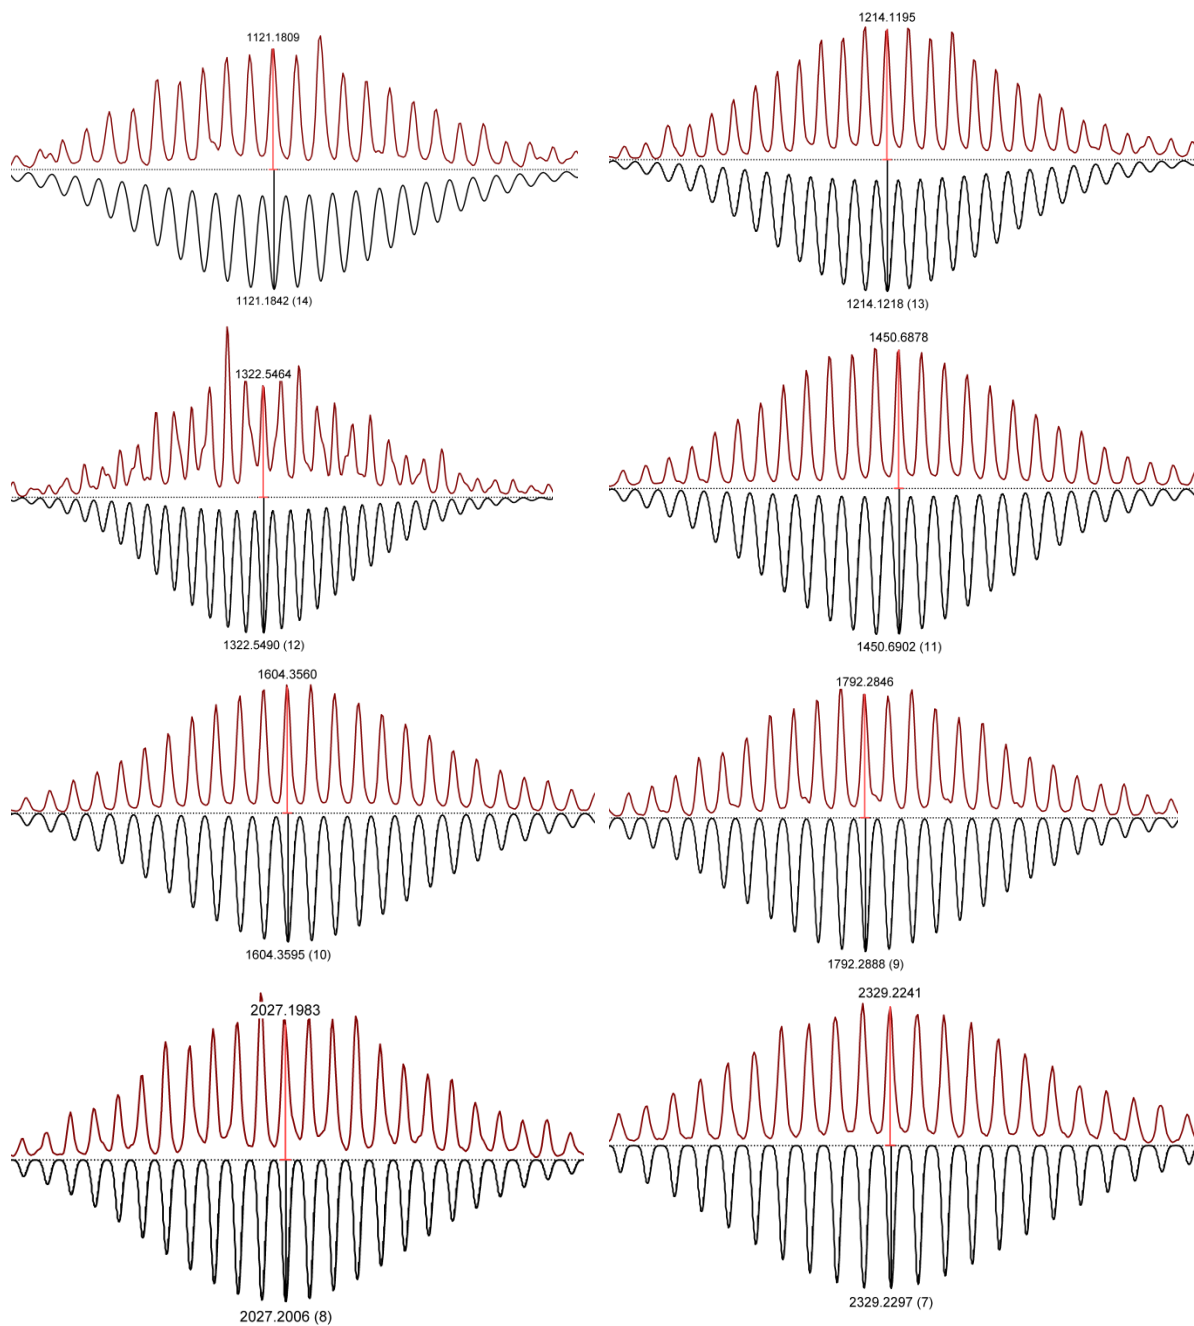

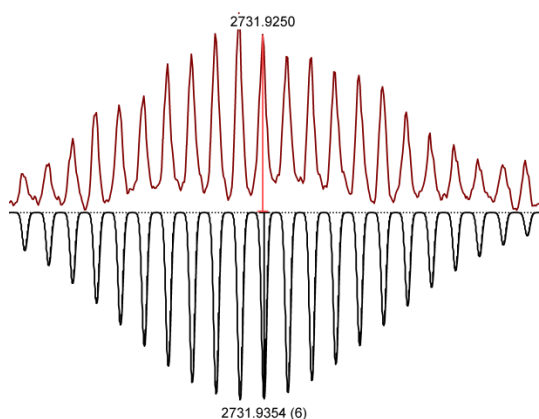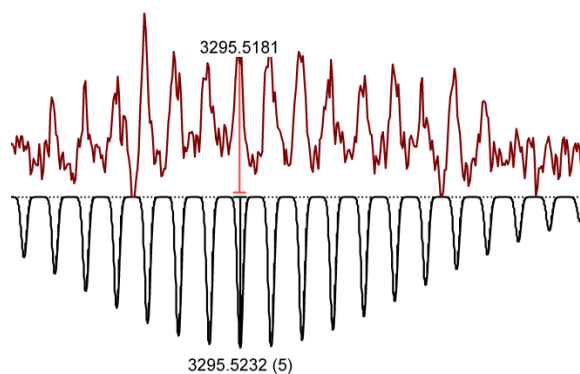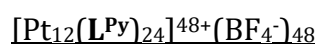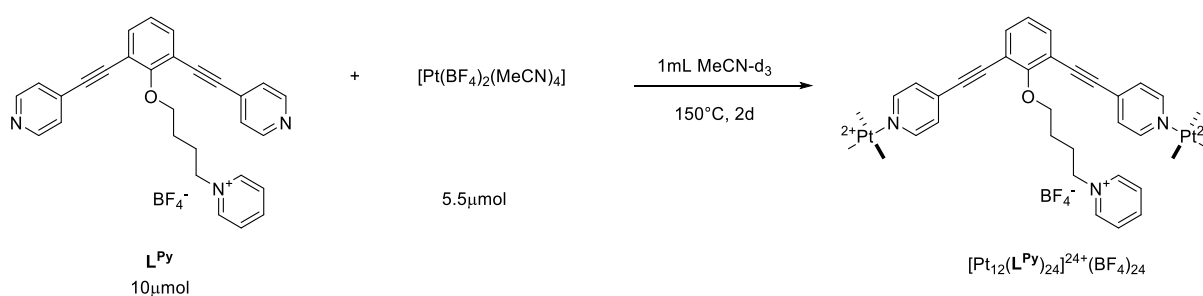

To a solution of LPy (5.18 mg, 10  $\mu\text{mol}$ , 1 eq.) in 0.5 mL MeCN- $d_3$ ,  $[\text{Pt}(\text{BF}_4)_2(\text{MeCN})_4]$  (2.93 mg, 5.5  $\mu\text{mol}$ , 0.55 eq.) in 0.5 mL MeCN- $d_3$  was added. The solution was then stirred at 150°C for 2d in a 10 mL high pressure tube.  $^1\text{H}$  NMR (300 MHz, Acetonitrile- $d_3$ )  $\delta$  9.00 (d,  $J = 6.3$  Hz, 3H), 8.85 (d,  $J = 6.1$  Hz, 2H), 8.71 (d,  $J = 6.3$  Hz, 1H), 8.55 (d,  $J = 7.9$  Hz, 1H), 8.15 – 7.96 (m, 3H), 7.69 (d,  $J = 7.7$  Hz, 1H), 7.67 – 7.59 (m, 5H), 7.26 (t,  $J = 7.8$  Hz, 1H), 4.72 (d,  $J = 7.6$  Hz, 2H), 4.32 (s, 0H).  $^{13}\text{C}$  NMR (126 MHz,  $\text{CD}_3\text{CN}$ )  $\delta$  161.00, 161.00, 150.08, 145.76, 144.39, 134.90, 130.44, 128.37, 128.32, 125.22, 124.47, 116.75, 91.01, 88.97, 73.86, 73.79, 73.79, 61.41, 28.37, 26.46. LogD( $\text{m}^2/\text{s}$ ) at 25°C (MeCN- $d_3$ ): -9.544 ( $d = 4.45$  nm).

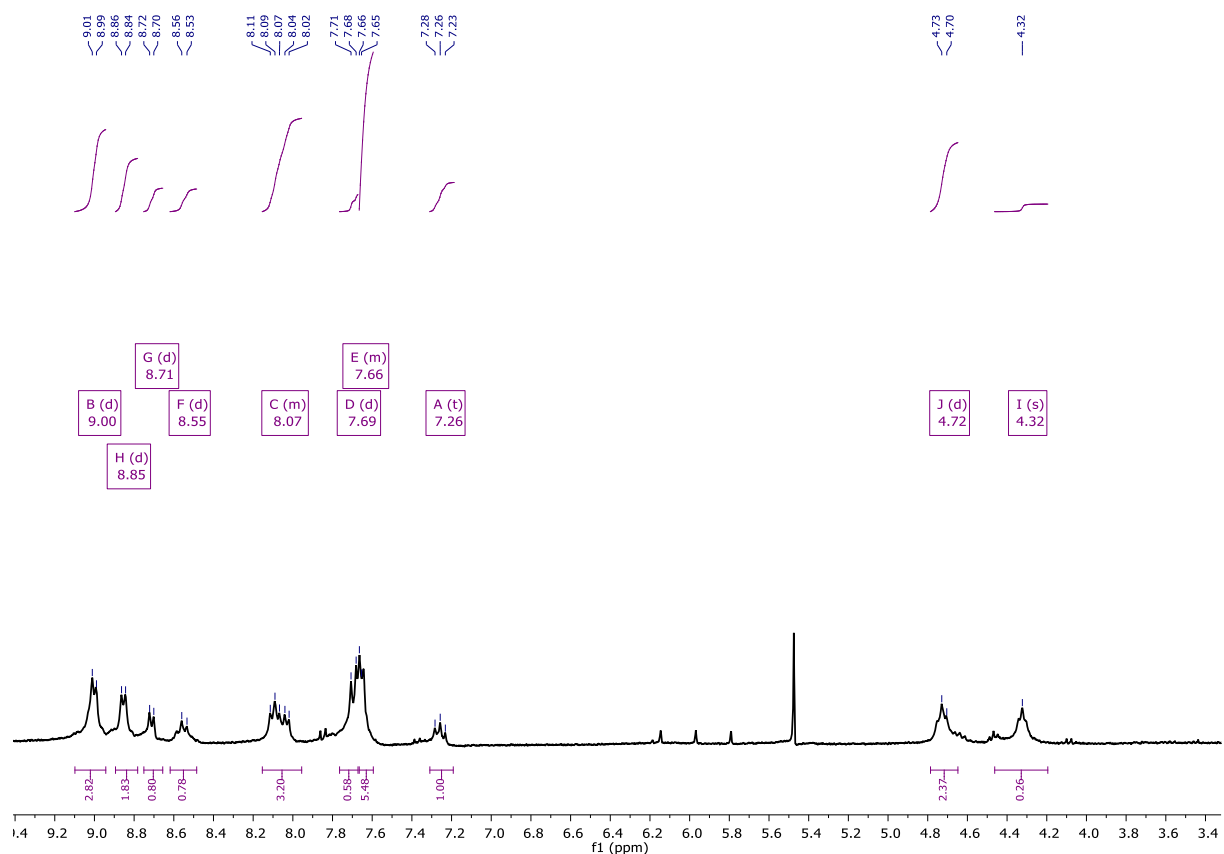

**Figure S53.**  $[\text{Pt}_{12}(\text{LPy})_{24}]^{24+}(\text{BF}_4^-)_{24}$  sphere,  $^1\text{H}$  NMR in  $\text{MeCN-d}_3$ .

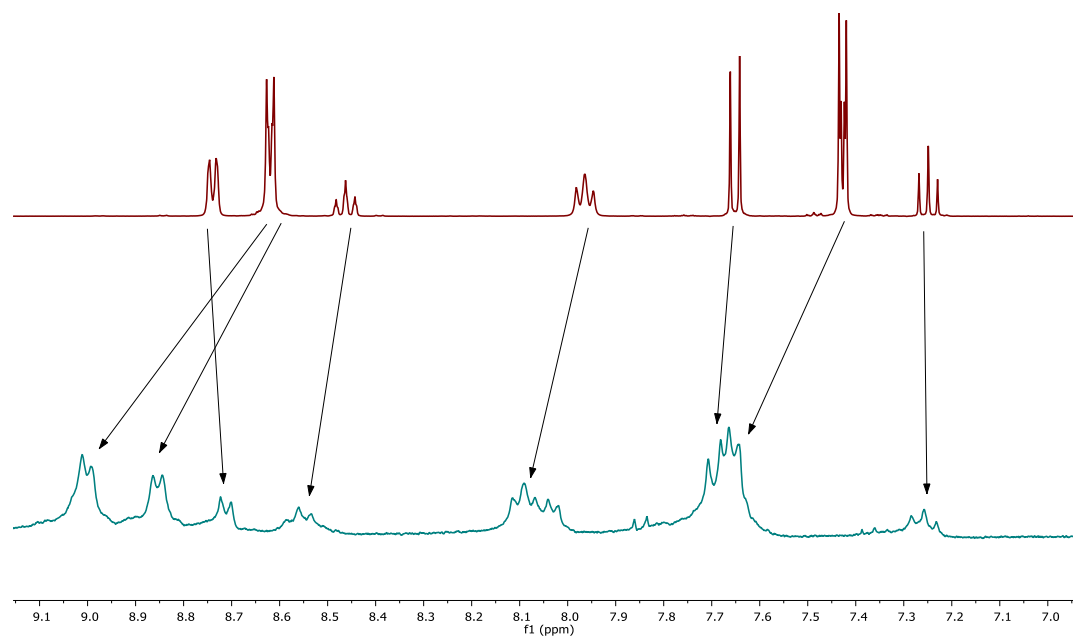

**Figure S54.** Comparison of free  $\text{LPy}$  building block (top) and  $[\text{Pt}_{12}(\text{LPy})_{24}]^{24+}(\text{BF}_4^-)_{24}$  sphere (bottom),  $^1\text{H}$  NMR in  $\text{MeCN-d}_3$ .



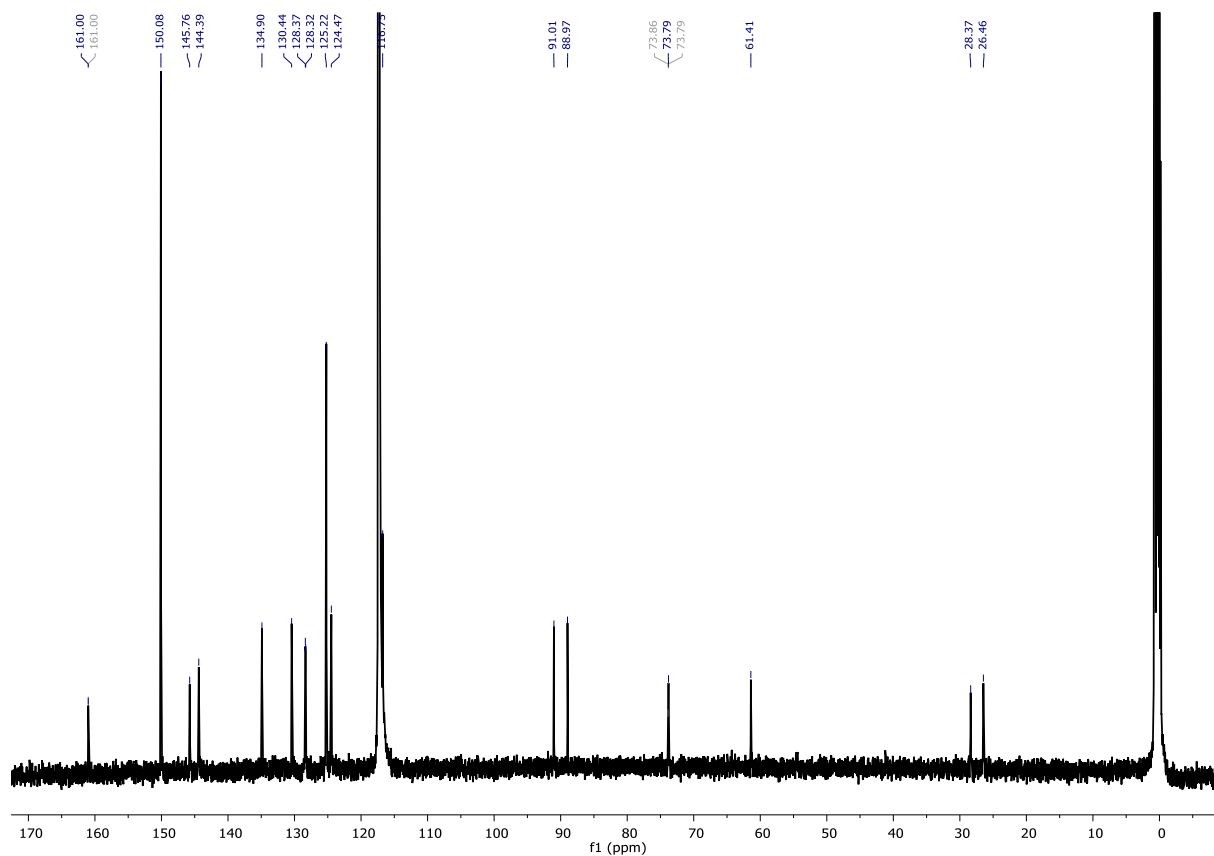

**Figure S55.**  $[\text{Pt}_{12}(\text{LPy})_{24}]^{2+}(\text{BF}_4^-)_{24}$  sphere,  $^{13}\text{C}$  NMR in  $\text{MeCN-d}_3$ .

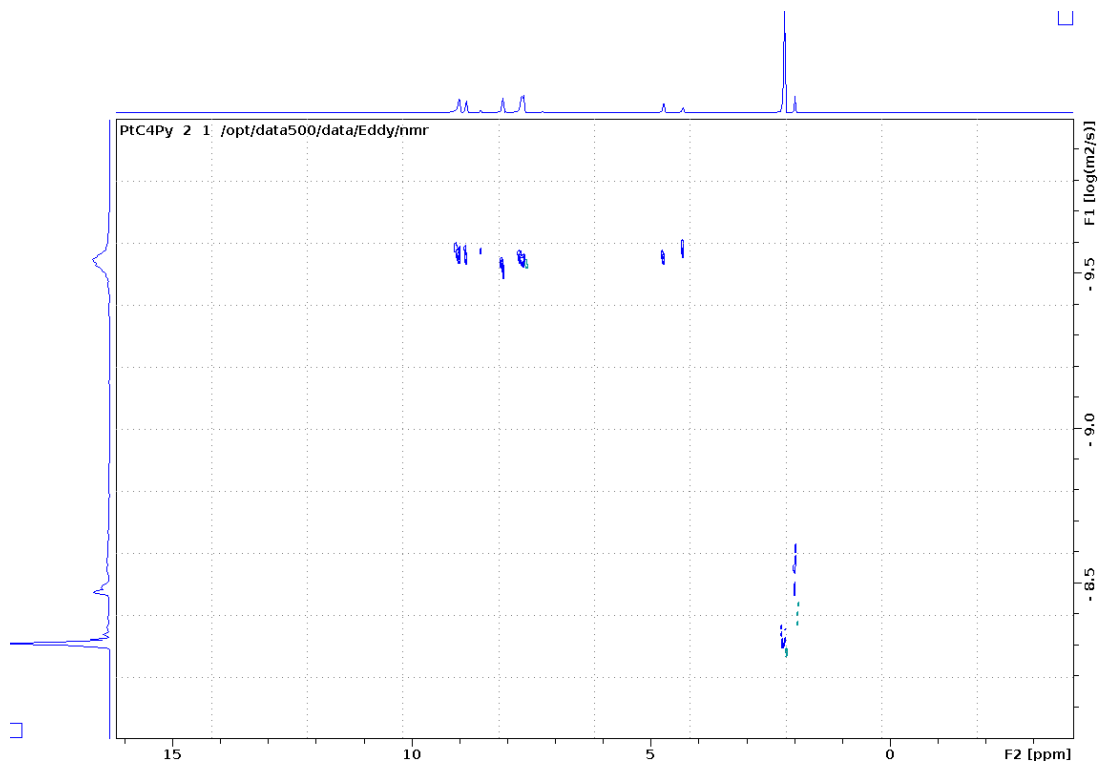

**Figure S56.**  $[\text{Pt}_{12}(\text{LPy})_{24}]^{4+}(\text{BF}_4^-)_{48}$  cage prepared at  $150^\circ\text{C}$ , DOSY in  $\text{MeCN-d}_3$  at  $25^\circ\text{C}$ .

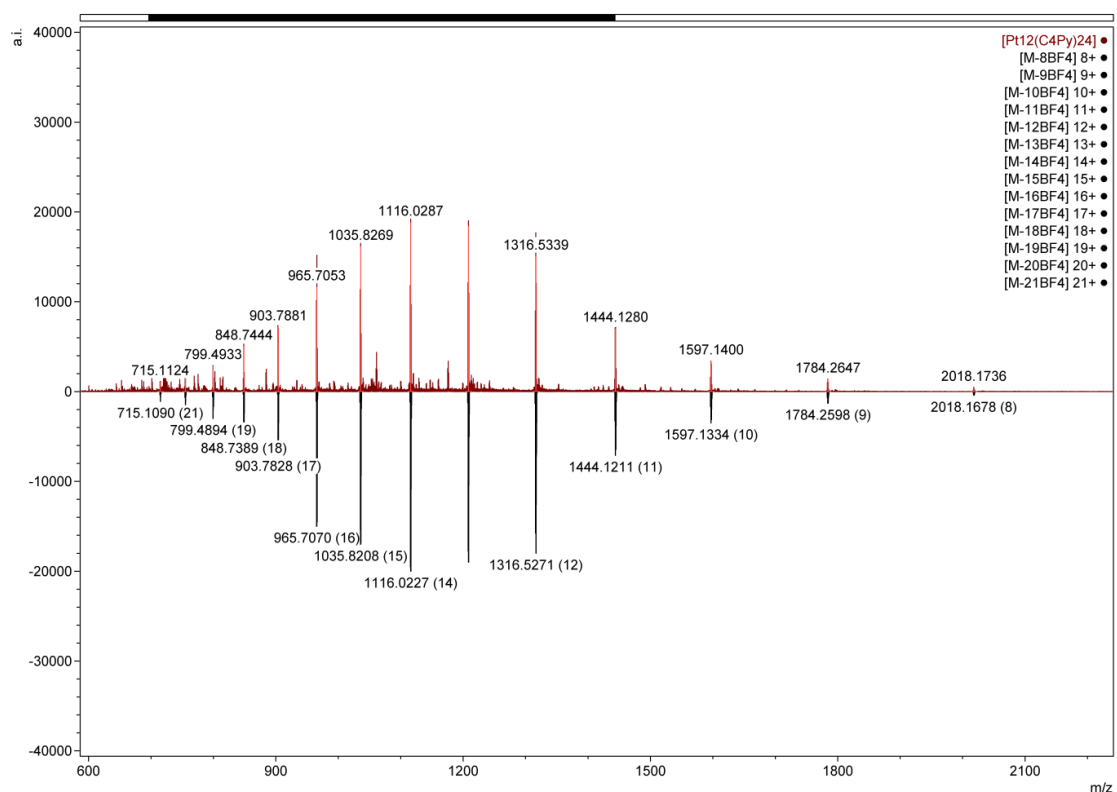

**Figure S57.** Full ESI-MS spectra of  $[\text{Pt}_{12}(\text{LPy})_{24}]^{48+}(\text{BF}_4^-)_{48}$  prepared at  $150^\circ\text{C}$  for 2d. Below the simulated spectra, above obtained spectra.

**Table S11.** Calculated and observed species of the  $[\text{Pt}_{12}(\text{LPy})_{24}]^{48+}$  assembly prepared at  $150^\circ\text{C}$  for 2d.

| Formula                                                        | calculated | obtained  |
|----------------------------------------------------------------|------------|-----------|
| $[\text{Pt}_{12}(\text{C4Py})_{24}(\text{BF}_4^-)_{43}]^{5+}$  | 3295.5232  | 3295.5181 |
| $[\text{Pt}_{12}(\text{C4Py})_{24}(\text{BF}_4^-)_{40}]^{8+}$  | 2018.1678  | 2018.1736 |
| $[\text{Pt}_{12}(\text{C4Py})_{24}(\text{BF}_4^-)_{39}]^{9+}$  | 1784.2598  | 1784.2647 |
| $[\text{Pt}_{12}(\text{C4Py})_{24}(\text{BF}_4^-)_{38}]^{10+}$ | 1597.1334  | 1597.1400 |
| $[\text{Pt}_{12}(\text{C4Py})_{24}(\text{BF}_4^-)_{37}]^{11+}$ | 1444.1211  | 1444.1280 |
| $[\text{Pt}_{12}(\text{C4Py})_{24}(\text{BF}_4^-)_{36}]^{12+}$ | 1316.5271  | 1316.5339 |
| $[\text{Pt}_{12}(\text{C4Py})_{24}(\text{BF}_4^-)_{35}]^{13+}$ | 1208.5633  | 1208.5697 |
| $[\text{Pt}_{12}(\text{C4Py})_{24}(\text{BF}_4^-)_{34}]^{14+}$ | 1116.0227  | 1116.0287 |
| $[\text{Pt}_{12}(\text{C4Py})_{24}(\text{BF}_4^-)_{33}]^{15+}$ | 1035.8208  | 1035.8269 |
| $[\text{Pt}_{12}(\text{C4Py})_{24}(\text{BF}_4^-)_{32}]^{16+}$ | 965.7070   | 965.7053  |
| $[\text{Pt}_{12}(\text{C4Py})_{24}(\text{BF}_4^-)_{31}]^{17+}$ | 903.7828   | 903.7881  |
| $[\text{Pt}_{12}(\text{C4Py})_{24}(\text{BF}_4^-)_{30}]^{18+}$ | 848.7389   | 848.7444  |
| $[\text{Pt}_{12}(\text{C4Py})_{24}(\text{BF}_4^-)_{29}]^{19+}$ | 799.4898   | 799.4933  |
| $[\text{Pt}_{12}(\text{C4Py})_{24}(\text{BF}_4^-)_{28}]^{20+}$ | 755.1646   | 755.1655  |
| $[\text{Pt}_{12}(\text{C4Py})_{24}(\text{BF}_4^-)_{27}]^{21+}$ | 715.1090   | 715.1124  |

**Table S12.** Zoom into different charged species of  $[\text{Pt}_{12}(\text{L}^{\text{Py}})_{24}]^{24+}$  assembly of a sample prepared at  $150^{\circ}\text{C}$  for 2d.

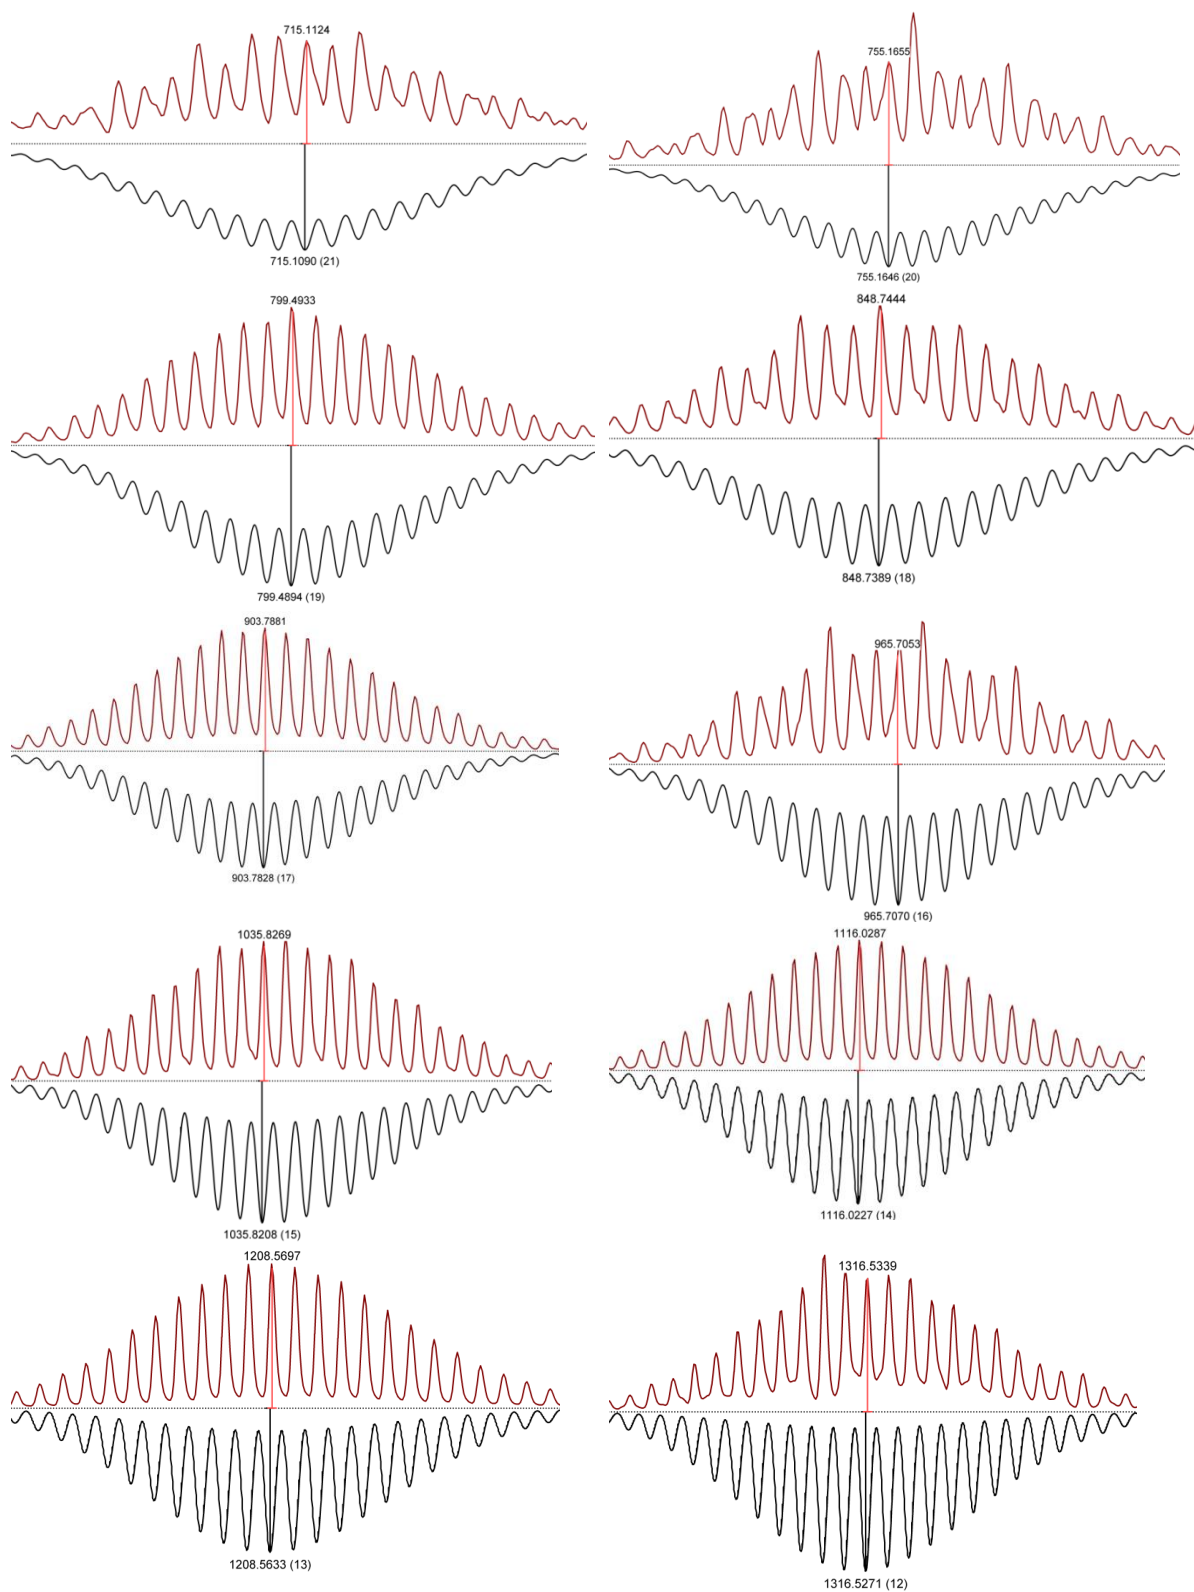

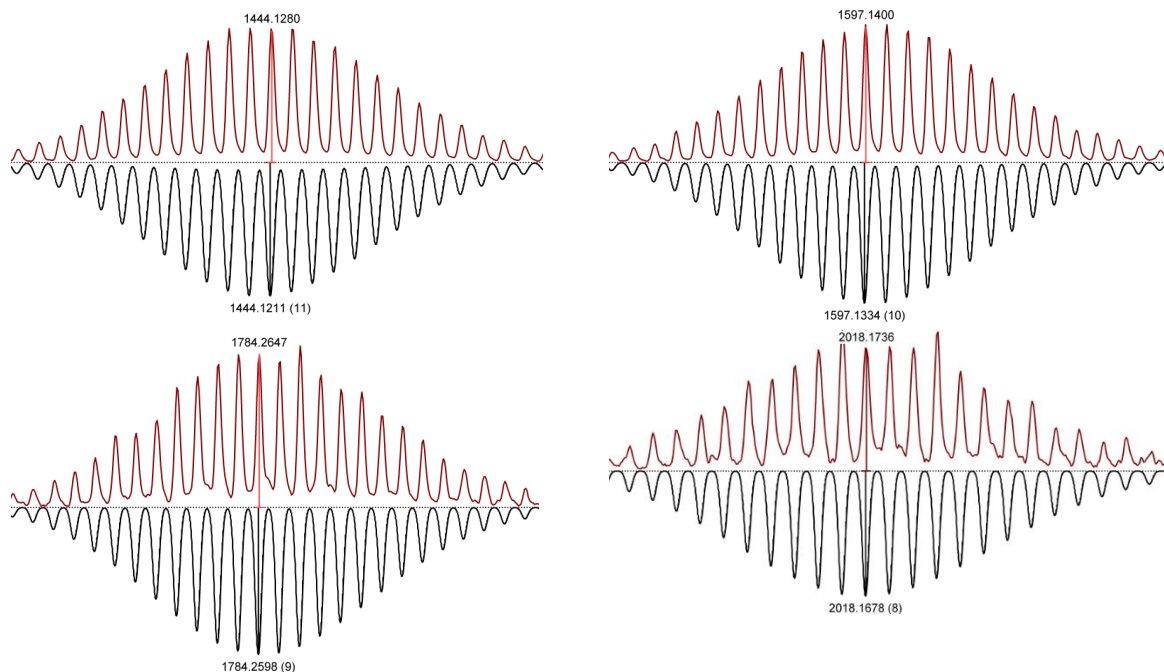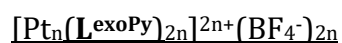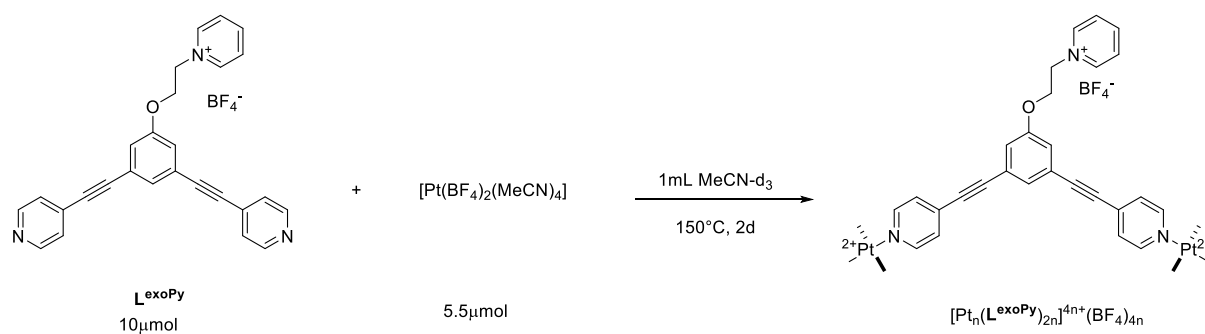

To a solution of  $\text{L}^{\text{exoPy}}$  (4.90 mg, 10  $\mu\text{mol}$ , 1 eq.) in 0.5 mL MeCN- $d_3$ ,  $[\text{Pt}(\text{BF}_4)_2(\text{MeCN})_4]$  (2.93 mg, 5.5  $\mu\text{mol}$ , 0.55 eq.) in 0.5 mL MeCN- $d_3$  was added. The solution was then stirred at 150°C for 2d in a 10 mL high pressure tube.  $^1\text{H}$  NMR (300 MHz, Acetonitrile- $d_3$ )  $\delta$  8.94 (s, 6H), 8.69 – 8.40 (m, 1H), 8.07 (s, 2H), 7.63 (d,  $J = 35.7$  Hz, 7H), 7.29 (s, 1H), 5.06 (s, 2H), 4.82 (s, 2H).

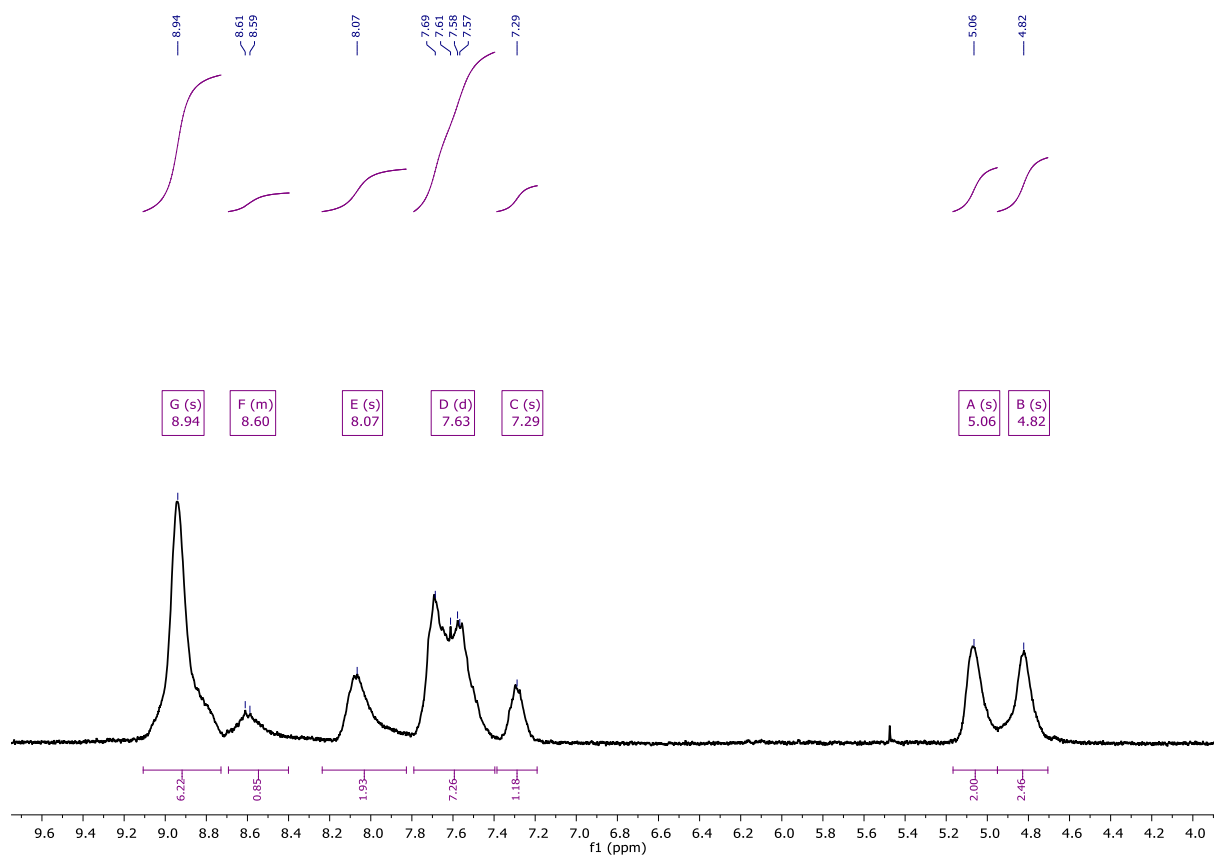

**Figure S58.**  $[\text{Pt}_n(\text{L}^{\text{exoPy}})_{2n}]^{4n+}(\text{BF}_4^-)_{4n}$  sphere,  $^1\text{H}$  NMR in  $\text{MeCN-d}_3$ .

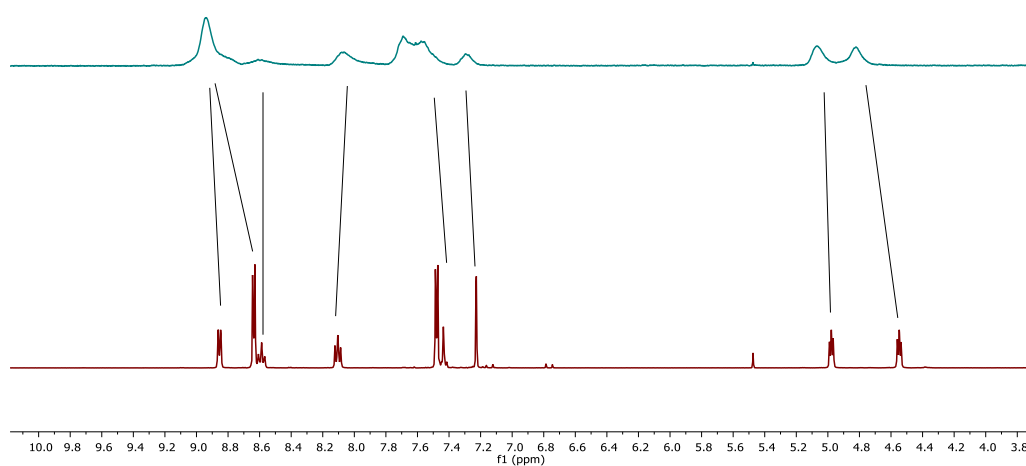

**Figure S59.** Comparison of free  $\text{L}^{\text{exoPy}}$  building block (bottom) and  $[\text{Pt}_n(\text{L}^{\text{exoPy}})_{2n}]^{4n+}(\text{BF}_4^-)_{4n}$  sphere (top),  $^1\text{H}$  NMR in  $\text{MeCN-d}_3$ .

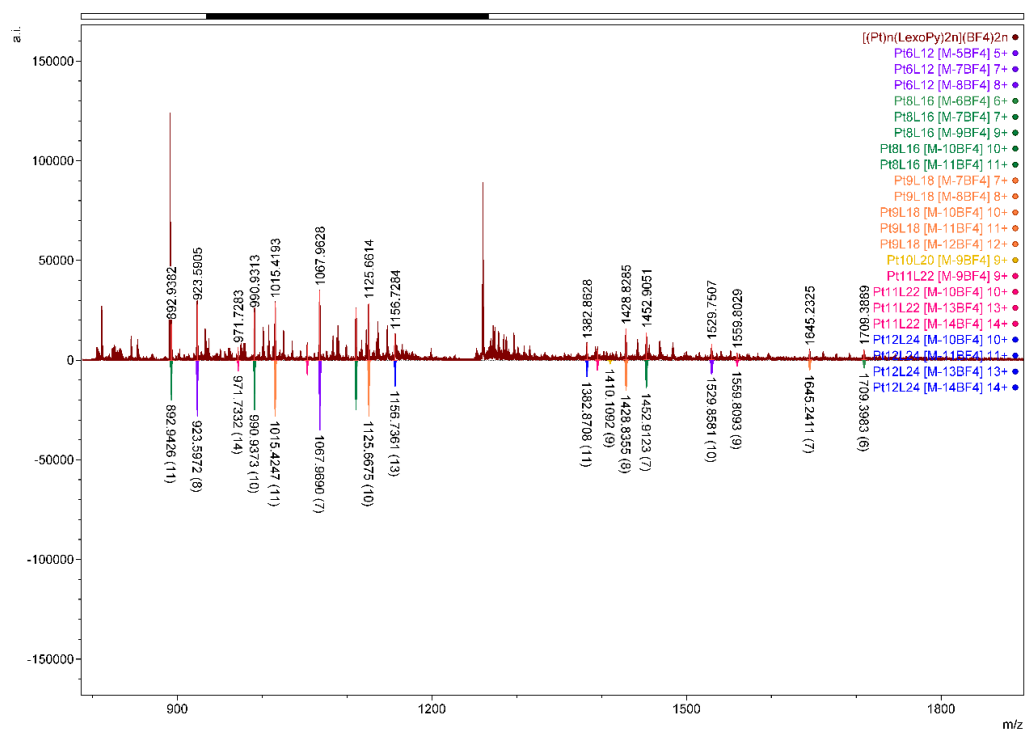

**Figure S60.** Full ESI-MS spectra of  $[\text{Pt}_n(\text{LexoPy})_{2n}]^{4n+}(\text{BF}_4^-)_{4n}$  prepared at  $150^\circ\text{C}$  for 2d. Below the simulated spectra of different sphere types, above obtained spectra.

**Table S13.** Calculated and observed species of the  $[\text{Pt}_n(\text{LexoPy})_{2n}]^{2n+}$  assemblies of a sample prepared at  $150^\circ\text{C}$  for 2d.

| Cage Type                       | Composition                                                      | Calculated | Found     |
|---------------------------------|------------------------------------------------------------------|------------|-----------|
| M <sub>6</sub> L <sub>12</sub>  | $[\text{Pt}_6(\text{LexoPy})_{12}(\text{BF}_4^-)_{16}]^{8+}$     | 923.5972   | 923.5905  |
|                                 | $[\text{Pt}_6(\text{LexoPy})_{12}(\text{BF}_4^-)_{17}]^{7+}$     | 1067.9690  | 1067.9628 |
|                                 | $[\text{Pt}_6(\text{LexoPy})_{12}(\text{BF}_4^-)_{19}]^{5+}$     | 1529.7581  | 1529.7507 |
| M <sub>8</sub> L <sub>16</sub>  | $[\text{Pt}_8(\text{LexoPy})_{16}(\text{BF}_4^-)_{21}]^{11+}$    | 892.9426   | 892.9382  |
|                                 | $[\text{Pt}_8(\text{LexoPy})_{16}(\text{BF}_4^-)_{22}]^{10+}$    | 990.9373   | 990.9313  |
|                                 | $[\text{Pt}_8(\text{LexoPy})_{16}(\text{BF}_4^-)_{23}]^{9+}$     | 1110.7086  | 1110.7025 |
|                                 | $[\text{Pt}_8(\text{LexoPy})_{16}(\text{BF}_4^-)_{25}]^{7+}$     | 1452.9123  | 1452.9051 |
|                                 | $[\text{Pt}_8(\text{LexoPy})_{16}(\text{BF}_4^-)_{26}]^{6+}$     | 1709.3983  | 1709.3889 |
| M <sub>9</sub> L <sub>18</sub>  | $[\text{Pt}_9(\text{LexoPy})_{18}(\text{BF}_4^-)_{25}]^{11+}$    | 1015.4247  | 1015.4193 |
|                                 | $[\text{Pt}_9(\text{LexoPy})_{18}(\text{BF}_4^-)_{26}]^{10+}$    | 1125.6675  | 1125.6614 |
|                                 | $[\text{Pt}_9(\text{LexoPy})_{18}(\text{BF}_4^-)_{28}]^{8+}$     | 1428.8355  | 1428.8285 |
|                                 | $[\text{Pt}_9(\text{LexoPy})_{18}(\text{BF}_4^-)_{29}]^{7+}$     | 1645.2411  | 1645.2325 |
| M <sub>11</sub> L <sub>22</sub> | $[\text{Pt}_{11}(\text{LexoPy})_{22}(\text{BF}_4^-)_{32}]^{14+}$ | 971.7332   | 971.7283  |
|                                 | $[\text{Pt}_{11}(\text{LexoPy})_{22}(\text{BF}_4^-)_{31}]^{13+}$ | 1053.0974  | 1053.0922 |
|                                 | $[\text{Pt}_{11}(\text{LexoPy})_{22}(\text{BF}_4^-)_{34}]^{10+}$ | 1395.1279  | 1395.1235 |
|                                 | $[\text{Pt}_{11}(\text{LexoPy})_{22}(\text{BF}_4^-)_{35}]^{9+}$  | 1559.8093  | 1559.8029 |
| M <sub>12</sub> L <sub>24</sub> | $[\text{Pt}_{12}(\text{LexoPy})_{24}(\text{BF}_4^-)_{35}]^{13+}$ | 1156.7361  | 1156.7284 |
|                                 | $[\text{Pt}_{12}(\text{LexoPy})_{24}(\text{BF}_4^-)_{37}]^{11+}$ | 1382.8708  | 1382.8628 |

**Table S14.** Zoom into different charged species of  $[\text{Pt}_n(\text{L}^{\text{exoPy}})_{2n}]^{2n+}$  assemblies of a sample prepared at 150°C for 2d.

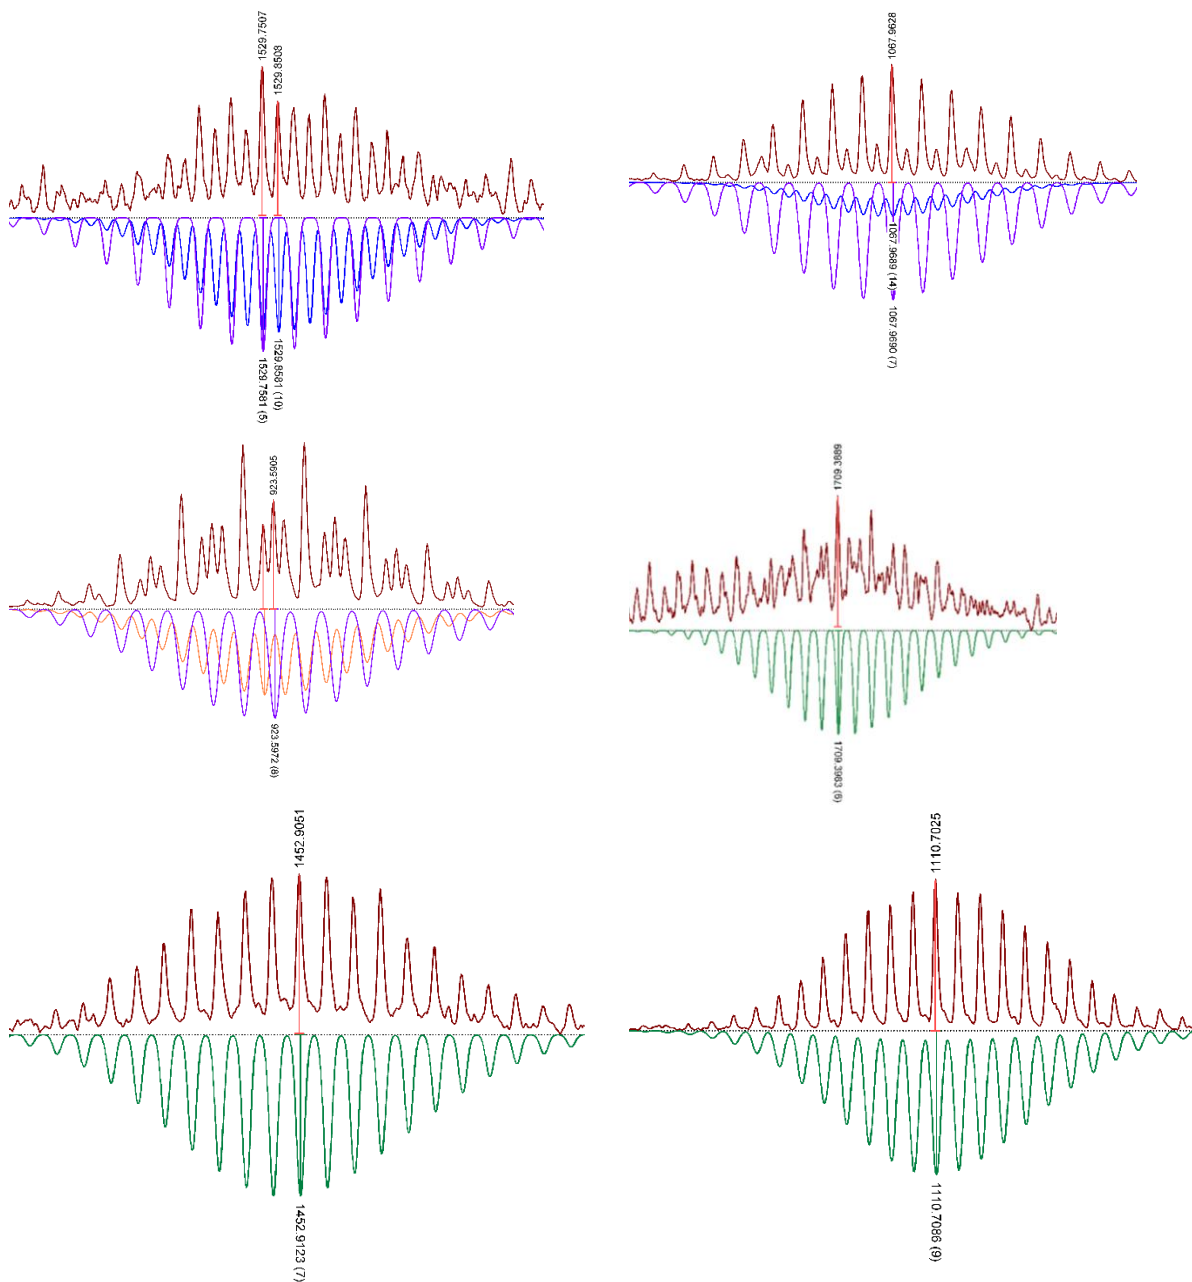

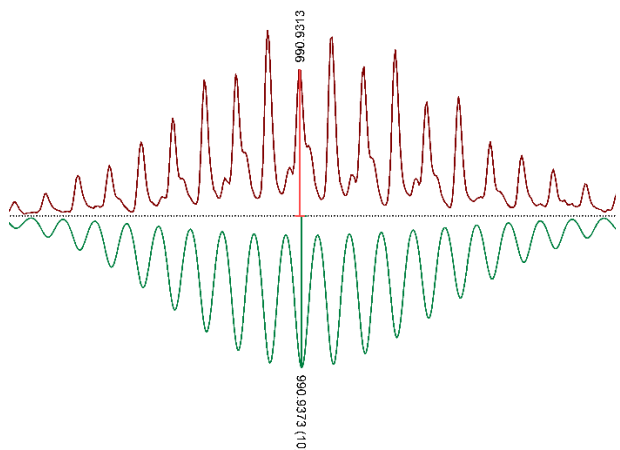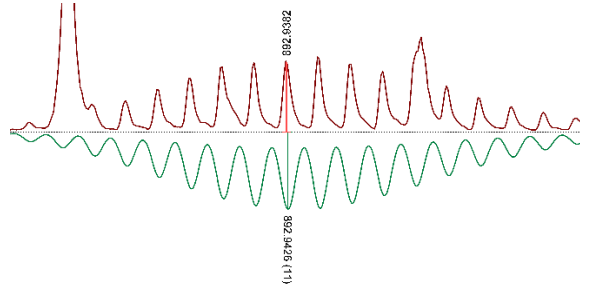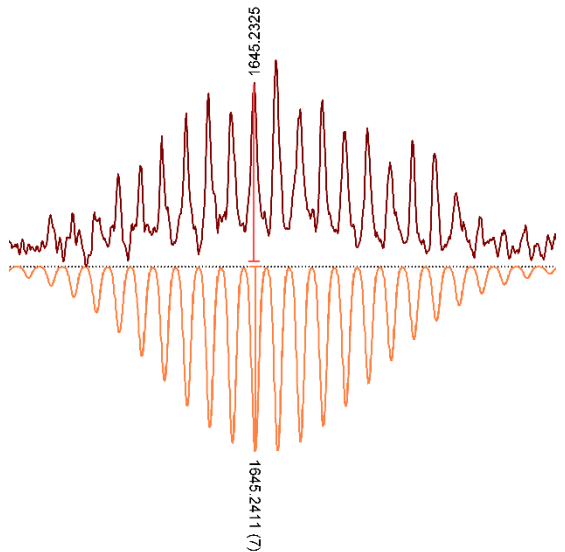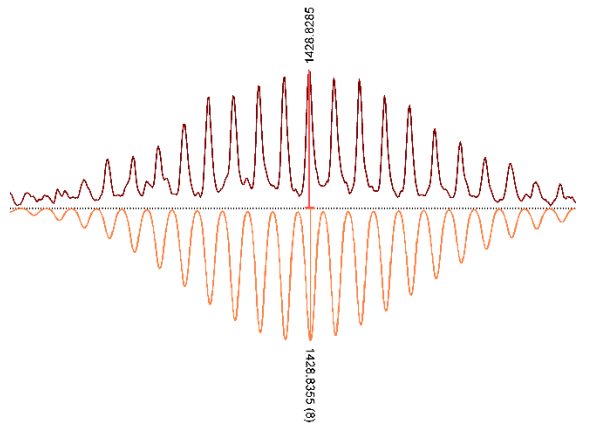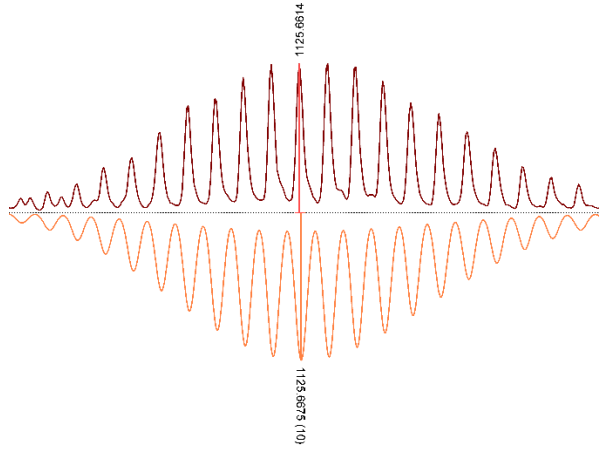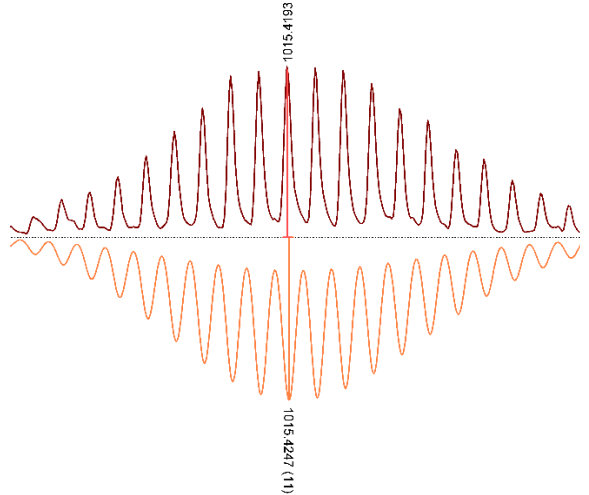



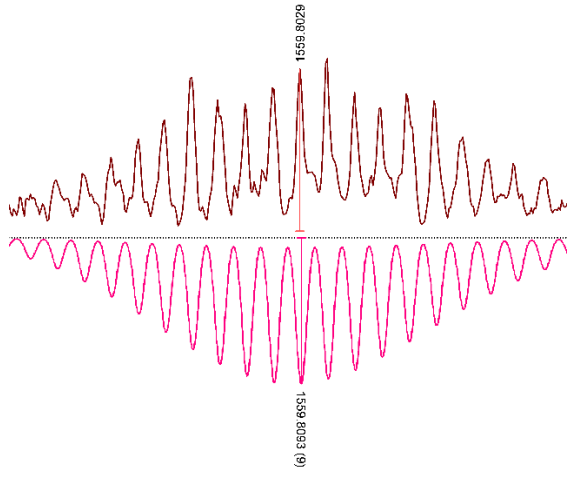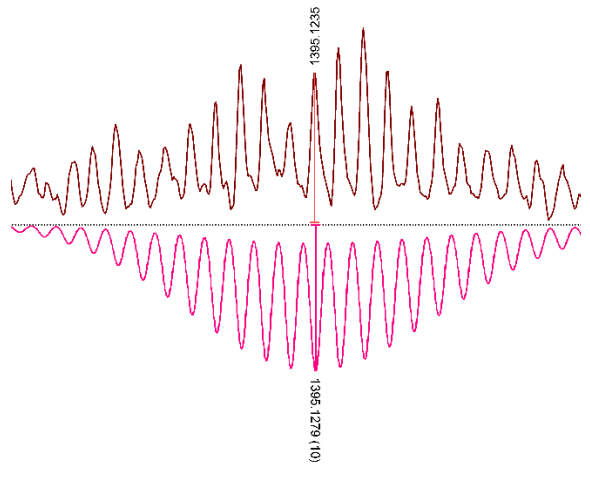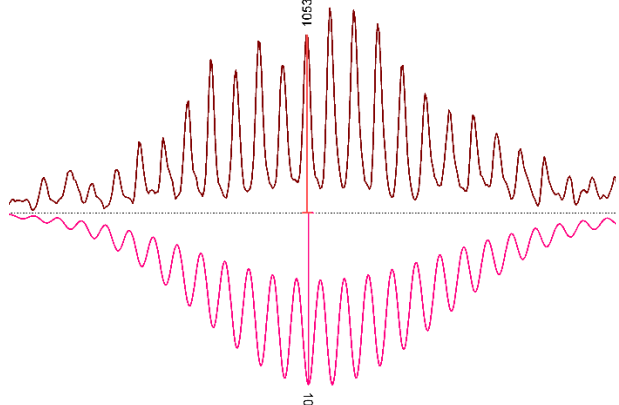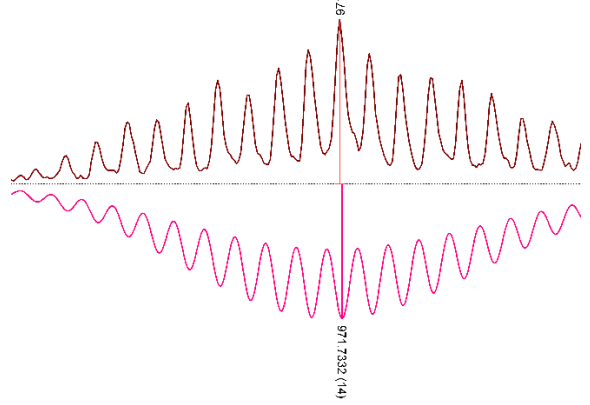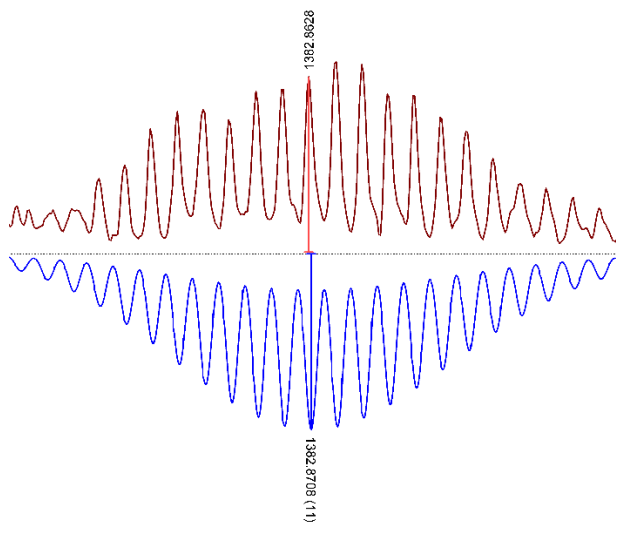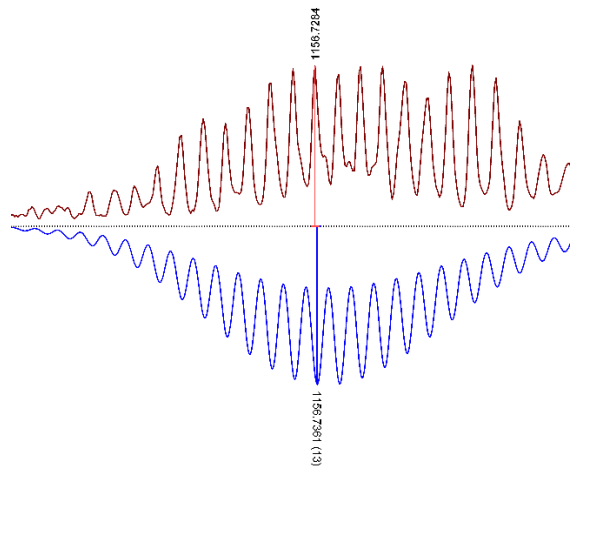

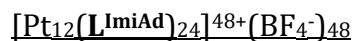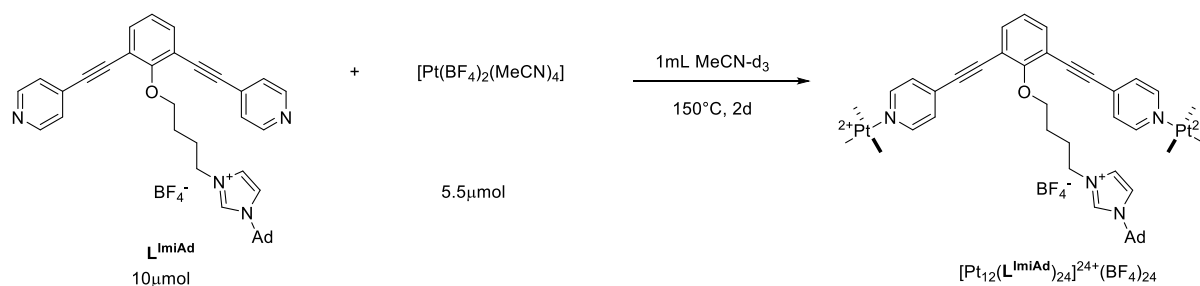

To a solution of  $\text{L}^{\text{ImiAd}}$  (6.40 mg, 10  $\mu\text{mol}$ , 1 eq.) in 0.5 mL MeCN- $d_3$ ,  $[\text{Pt}(\text{BF}_4)_2(\text{MeCN})_4]$  (2.93 mg, 5.5  $\mu\text{mol}$ , 0.55 eq.) in 0.5 mL MeCN- $d_3$  was added. The solution was then stirred at 150°C for 2d in a 10 mL high pressure tube.  $^1\text{H NMR}$  (300 MHz, Acetonitrile- $d_3$ )  $\delta$  9.00 (m, 3H), 8.64 (s, 1H), 7.58 (m, 8H), 7.25 (m, 1H), 4.29 (m, 4H). LogD( $\text{m}^2/\text{s}$ ) at 25°C (MeCN- $d_3$ ): -9.482 ( $d = 4.45$  nm).

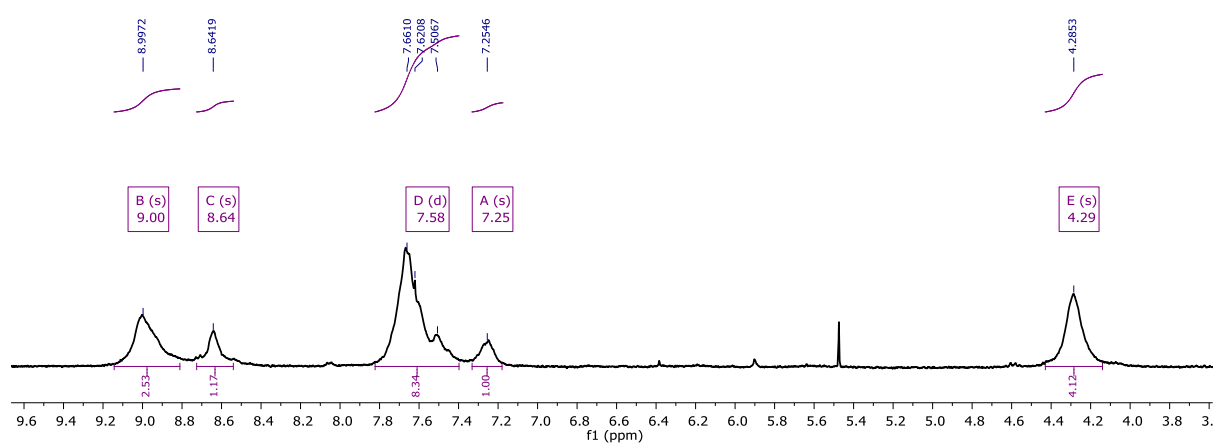

**Figure S61.**  $[\text{Pt}_{12}(\text{L}^{\text{ImiAd}})_{24}]^{48+}(\text{BF}_4^-)_{48}$  sphere,  $^1\text{H NMR}$  in MeCN- $d_3$ .

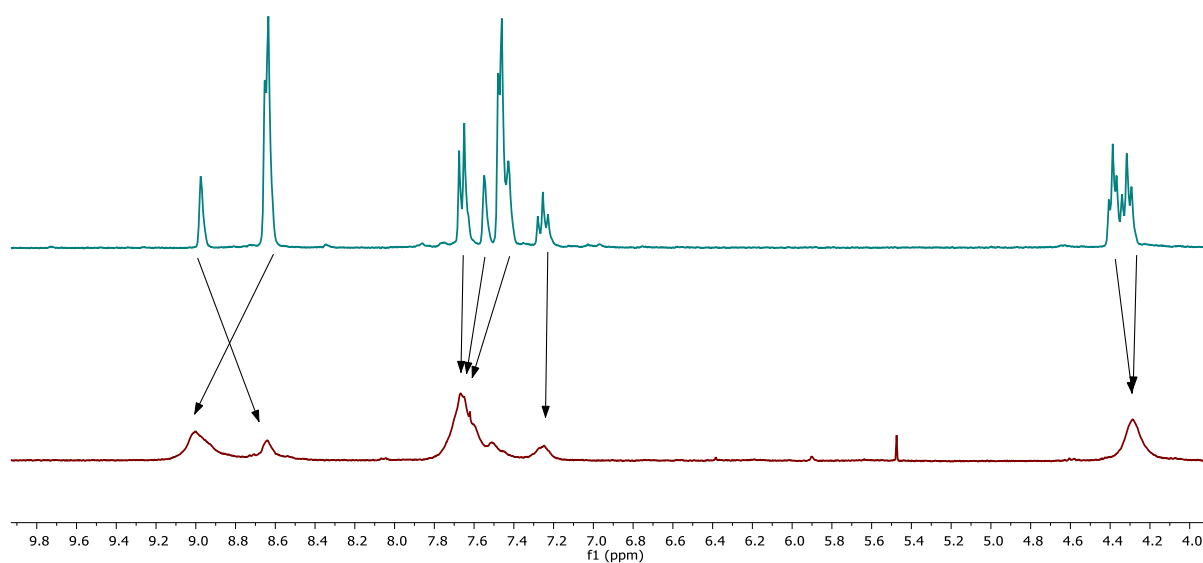

**Figure S62.** Comparison of free  $\text{L}^{\text{ImiAd}}$  building block (top) and  $[\text{Pt}_{12}(\text{L}^{\text{ImiAd}})_{24}]^{48+}(\text{BF}_4^-)_{48}$  sphere (bottom),  $^1\text{H NMR}$  in MeCN- $d_3$ .

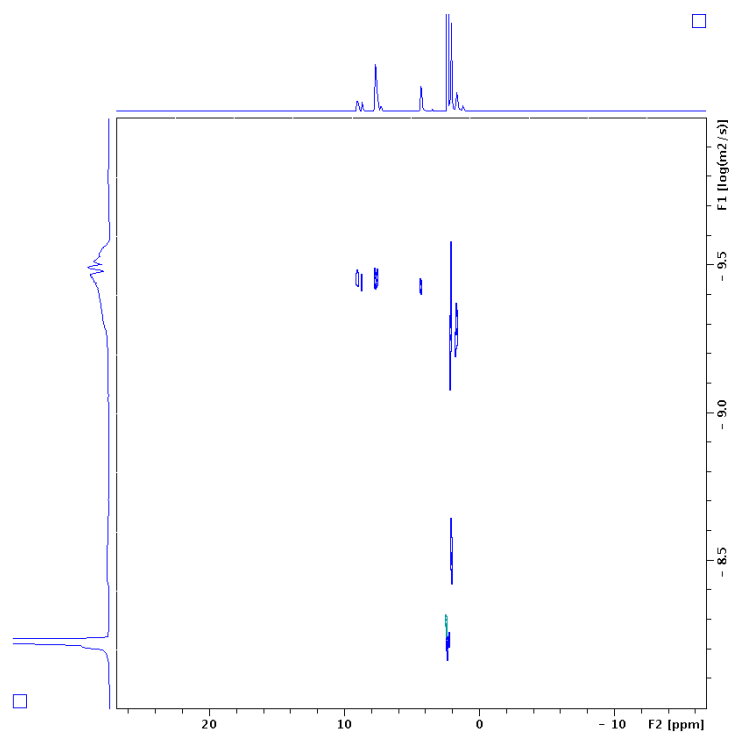

**Figure S63.**  $[\text{Pt}_{12}(\text{LImiAd})_{24}]^{48+}(\text{BF}_4^-)_{24}$  cage prepared at  $150^\circ\text{C}$ , DOSY in  $\text{MeCN-d}_3$  at  $25^\circ\text{C}$ .

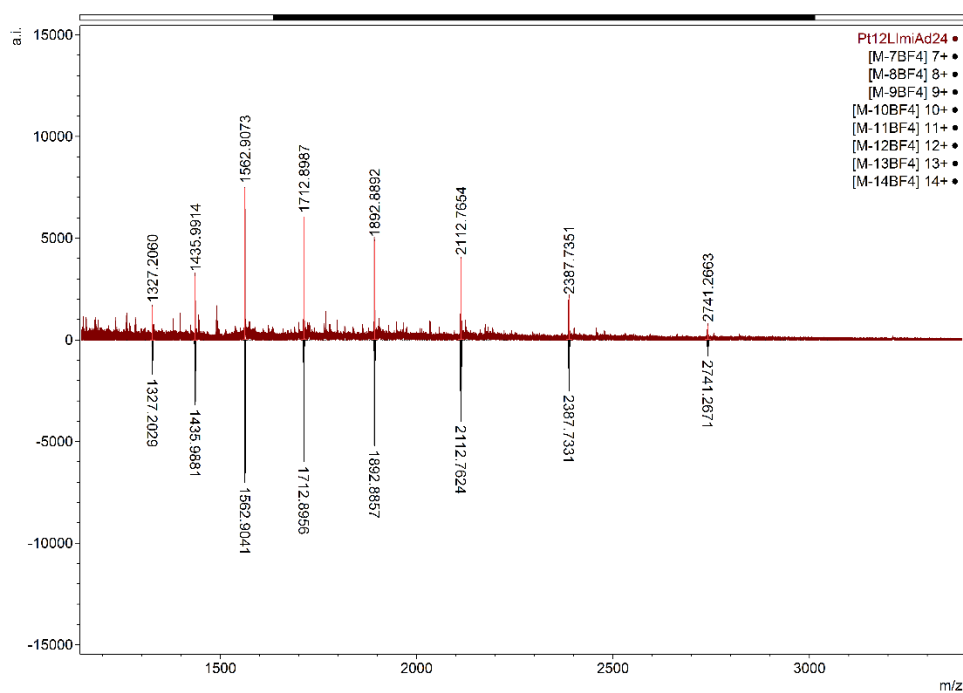

**Figure S64.** Full ESI-MS spectra of  $[\text{Pt}_{12}(\text{LImiAd})_{24}]^{48+}(\text{BF}_4^-)_{24}$  prepared at  $150^\circ\text{C}$  for 2d. Below the simulated spectra, above obtained spectra.

**Table S15.** Calculated and observed species of the  $[\text{Pt}_{12}(\text{L}^{\text{ImiAd}})_{24}]^{48+}$  assembly prepared at 150°C for 2d.

| Formula                                                                    | calculated | obtained  |
|----------------------------------------------------------------------------|------------|-----------|
| $[\text{Pt}_{12}(\text{L}^{\text{ImiAd}})_{24}(\text{BF}_4^-)_{41}]^{7+}$  | 2741.2671  | 2741.2663 |
| $[\text{Pt}_{12}(\text{L}^{\text{ImiAd}})_{24}(\text{BF}_4^-)_{40}]^{8+}$  | 2387.7331  | 2387.7351 |
| $[\text{Pt}_{12}(\text{L}^{\text{ImiAd}})_{24}(\text{BF}_4^-)_{39}]^{9+}$  | 2112.7624  | 2112.7654 |
| $[\text{Pt}_{12}(\text{L}^{\text{ImiAd}})_{24}(\text{BF}_4^-)_{38}]^{10+}$ | 1892.8857  | 1892.8892 |
| $[\text{Pt}_{12}(\text{L}^{\text{ImiAd}})_{24}(\text{BF}_4^-)_{37}]^{11+}$ | 1712.8956  | 1712.8987 |
| $[\text{Pt}_{12}(\text{L}^{\text{ImiAd}})_{24}(\text{BF}_4^-)_{36}]^{12+}$ | 1562.9041  | 1562.9073 |
| $[\text{Pt}_{12}(\text{L}^{\text{ImiAd}})_{24}(\text{BF}_4^-)_{35}]^{13+}$ | 1435.9881  | 1435.9914 |
| $[\text{Pt}_{12}(\text{L}^{\text{ImiAd}})_{24}(\text{BF}_4^-)_{34}]^{14+}$ | 1327.2029  | 1327.2060 |

**Table S16.** Zoom into different charged species of  $[\text{Pt}_{12}(\text{L}^{\text{ImiAd}})_{24}]^{48+}$  assembly of a sample prepared at 150°C for 2d.

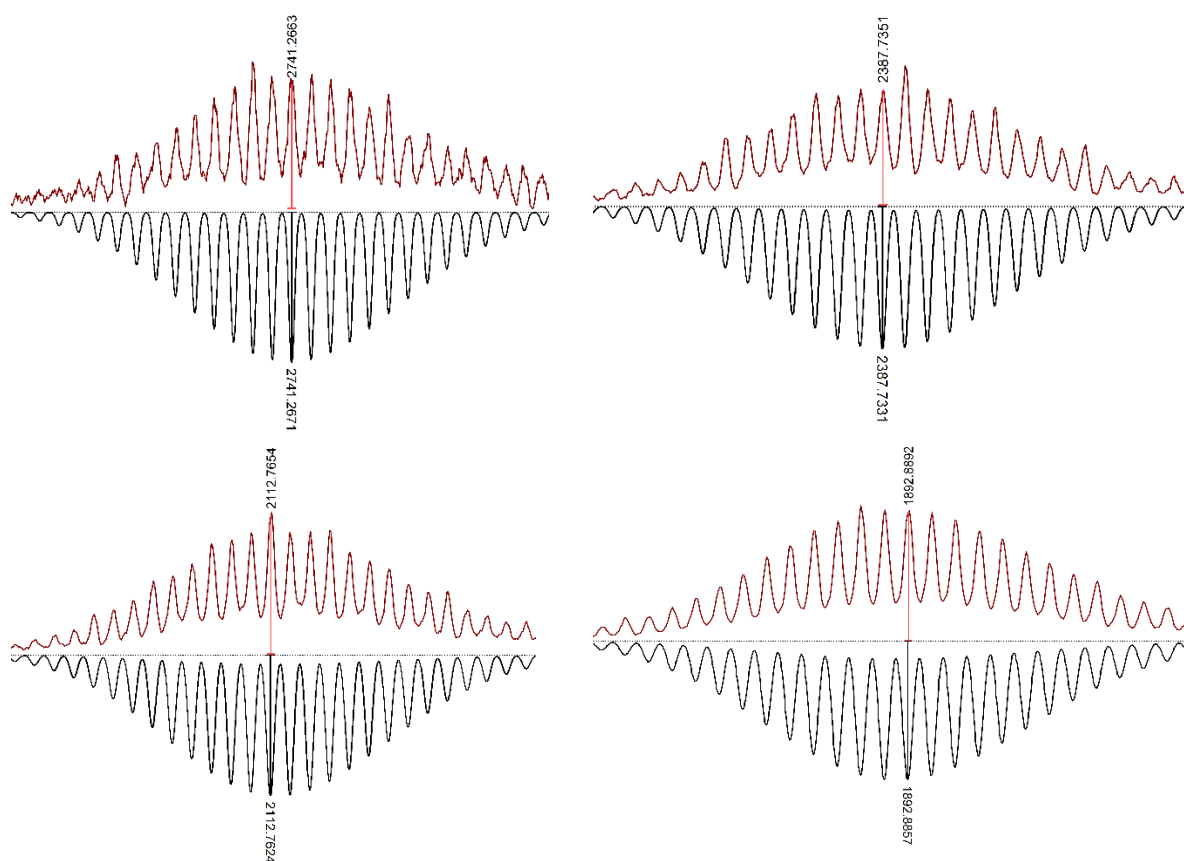

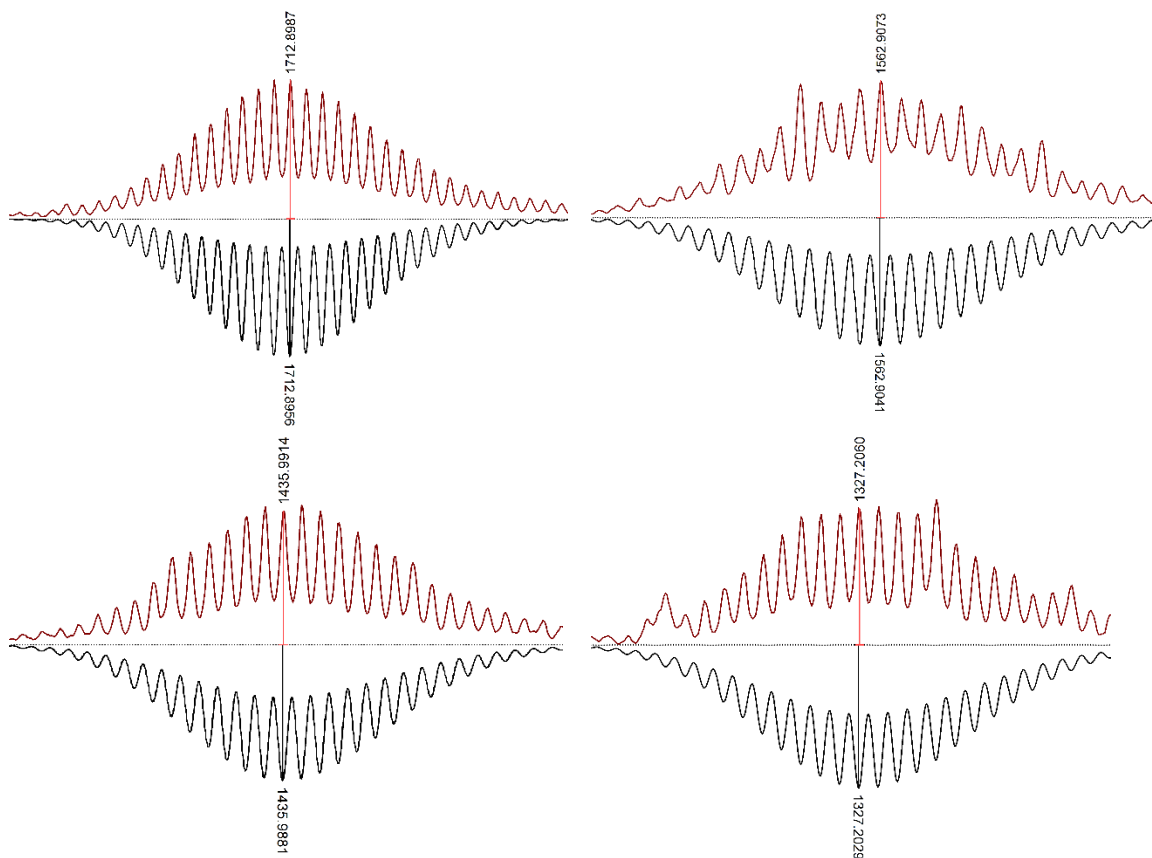

## Variable temperature Studies (SI3)

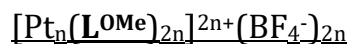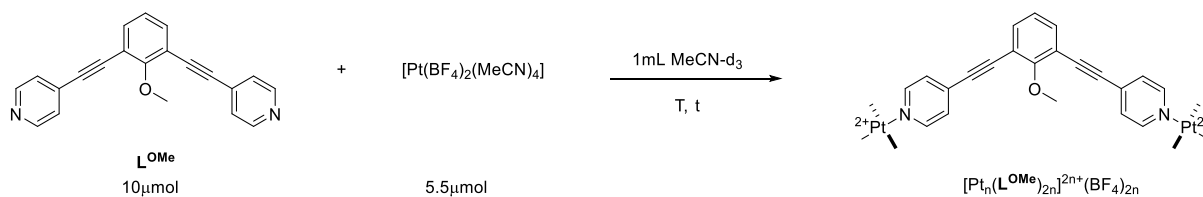

Multiple samples containing a solution of  $\text{L}^{\text{OMe}}$  (3.1 mg, 10  $\mu\text{mol}$ , 1 eq.) in 0.5 mL MeCN- $\text{d}_3$  and  $[\text{Pt}(\text{BF}_4)_2(\text{MeCN})_4]$  (2.93 mg, 5.5  $\mu\text{mol}$ , 0.55 eq.) in 0.5 mL MeCN- $\text{d}_3$  were prepared. The solutions were then stirred at noted temperature for 24h or longer in 10 mL high pressure tubes. At different time points, the single solutions were taken out and measured with  $^1\text{H}$  NMR, DOSY and MS. Exemplary  $^1\text{H}$  NMR spectra are displayed in the main text.

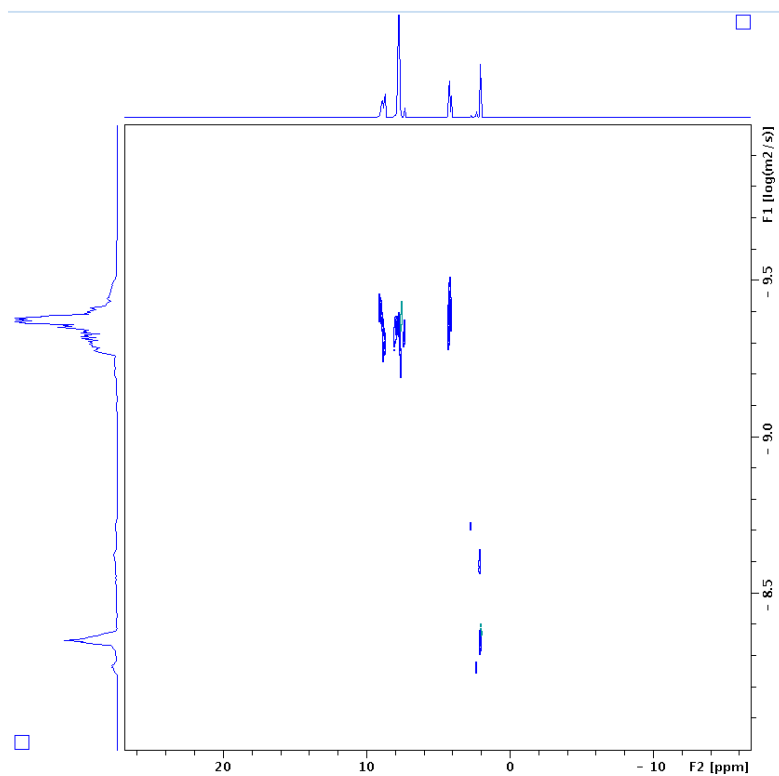

**Figure S65.**  $[\text{Pt}_n(\text{L}^{\text{OMe}})_{2n}]^{2n+}(\text{BF}_4^-)_{2n}$  cage prepared at 25°C, DOSY in MeCN- $d_3$  at 25°C.

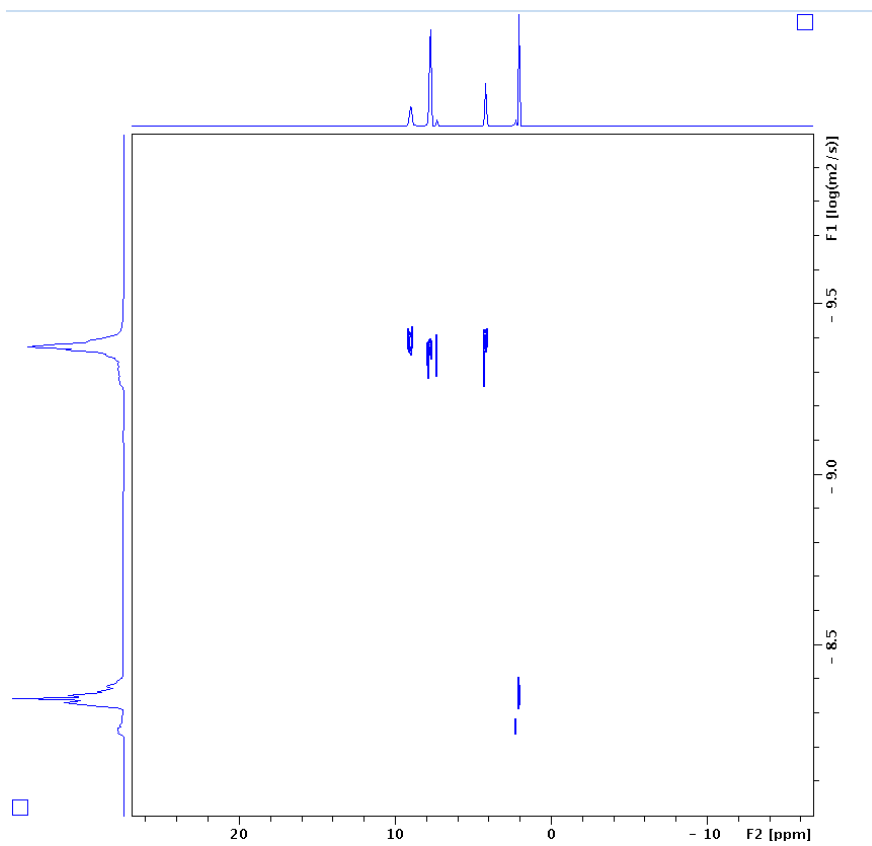

**Figure S66.**  $[\text{Pt}_n(\text{L}^{\text{OMe}})_{2n}]^{2n+}(\text{BF}_4^-)_{2n}$  cage prepared at 85°C, DOSY in MeCN- $d_3$  at 25°C.

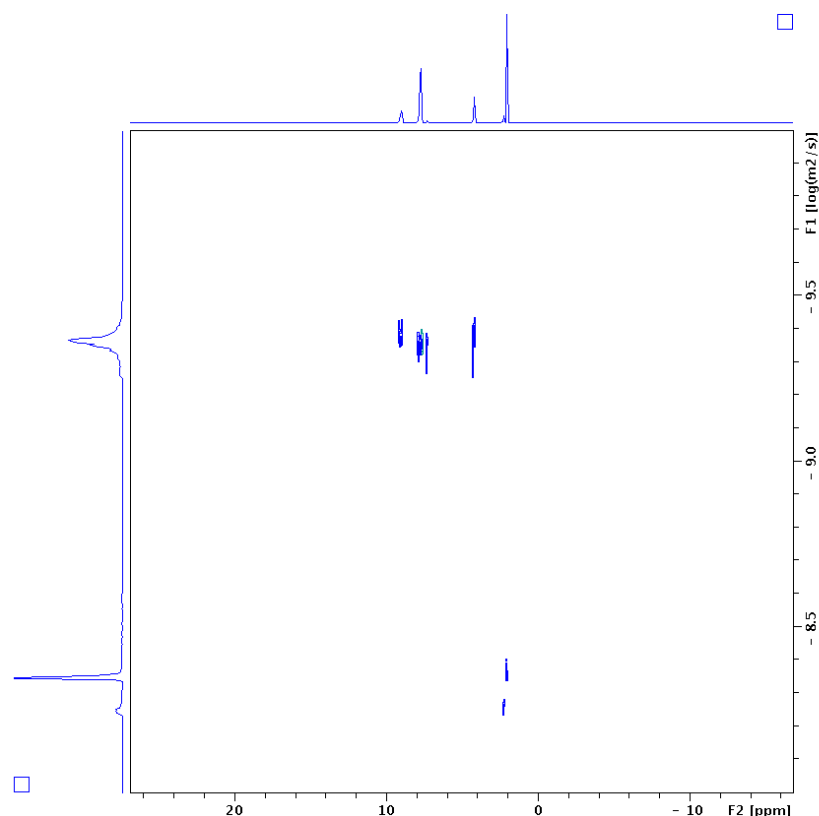

**Figure S67.**  $[\text{Pt}_n(\text{L}^{\text{OMe}})_{2n}]^{2n+}(\text{BF}_4^-)_{2n}$  cage prepared at 110°C, DOSY in  $\text{MeCN-d}_3$  at 25°C.

MS analysis was performed on undiluted samples using the same parameters for each solution. The distributions were calculated using the counts for high intensity unique peaks assigned for the individual assemblies as follows:

**Table S17.** Assigned unique signals of  $[\text{Pt}_n(\text{L}^{\text{OMe}})_{2n}]^{2n+}$  assemblies whose development was followed over a range of temperature and time.

| Structure                                      | Unique signal                                                            | M/z   |
|------------------------------------------------|--------------------------------------------------------------------------|-------|
| $[\text{Pt}_6(\text{L}^{\text{OMe}})_{12}]$    | $[\text{Pt}_6(\text{L}^{\text{OMe}})_{12}(\text{BF}_4^-)_7]^{5+}$        | 1100* |
| $[\text{Pt}_7(\text{L}^{\text{OMe}})_{14}]$    | $[\text{Pt}_7(\text{L}^{\text{OMe}})_{14}(\text{BF}_4^-)_9]^{5+}$        | 1297  |
| $[\text{Pt}_8(\text{L}^{\text{OMe}})_{16}]$    | $[\text{Pt}_8(\text{L}^{\text{OMe}})_{16}(\text{BF}_4^-)_9]^{7+}$        | 1043  |
| $[\text{Pt}_9(\text{L}^{\text{OMe}})_{18}]$    | $[\text{Pt}_9(\text{L}^{\text{OMe}})_{18}(\text{BF}_4^-)_{11}]^{7+}$     | 1185  |
| $[\text{Pt}_{10}(\text{L}^{\text{OMe}})_{20}]$ | $[\text{Pt}_{10}(\text{L}^{\text{OMe}})_{20}(\text{BF}_4^-)_{11}]^{9+}$  | 1012  |
| $[\text{Pt}_{11}(\text{L}^{\text{OMe}})_{22}]$ | $[\text{Pt}_{11}(\text{L}^{\text{OMe}})_{22}(\text{BF}_4^-)_{13}]^{9+}$  | 1122  |
| $[\text{Pt}_{12}(\text{L}^{\text{OMe}})_{24}]$ | $[\text{Pt}_{12}(\text{L}^{\text{OMe}})_{24}(\text{BF}_4^-)_{13}]^{11+}$ | 992   |

\*due to an overlap with the 10+ signal of the  $\text{M}_{12}\text{L}_{24}$  assembly, the difference between both assemblies was considered.

The obtained individual values were then divided by the total amount of counts obtained by adding all individual counts together and multiplied by 100 to obtain the fraction of the individual spheres. A baseline correction was not performed prior to analysis.

Deconvolution of the investigated peaks was not necessary because they represent unique signals of individual assemblies (only for the peak at 1100, intensity of  $M_{12}L_{24}$  assembly was subtracted from the observed value for the  $M_6L_{12}$  species).

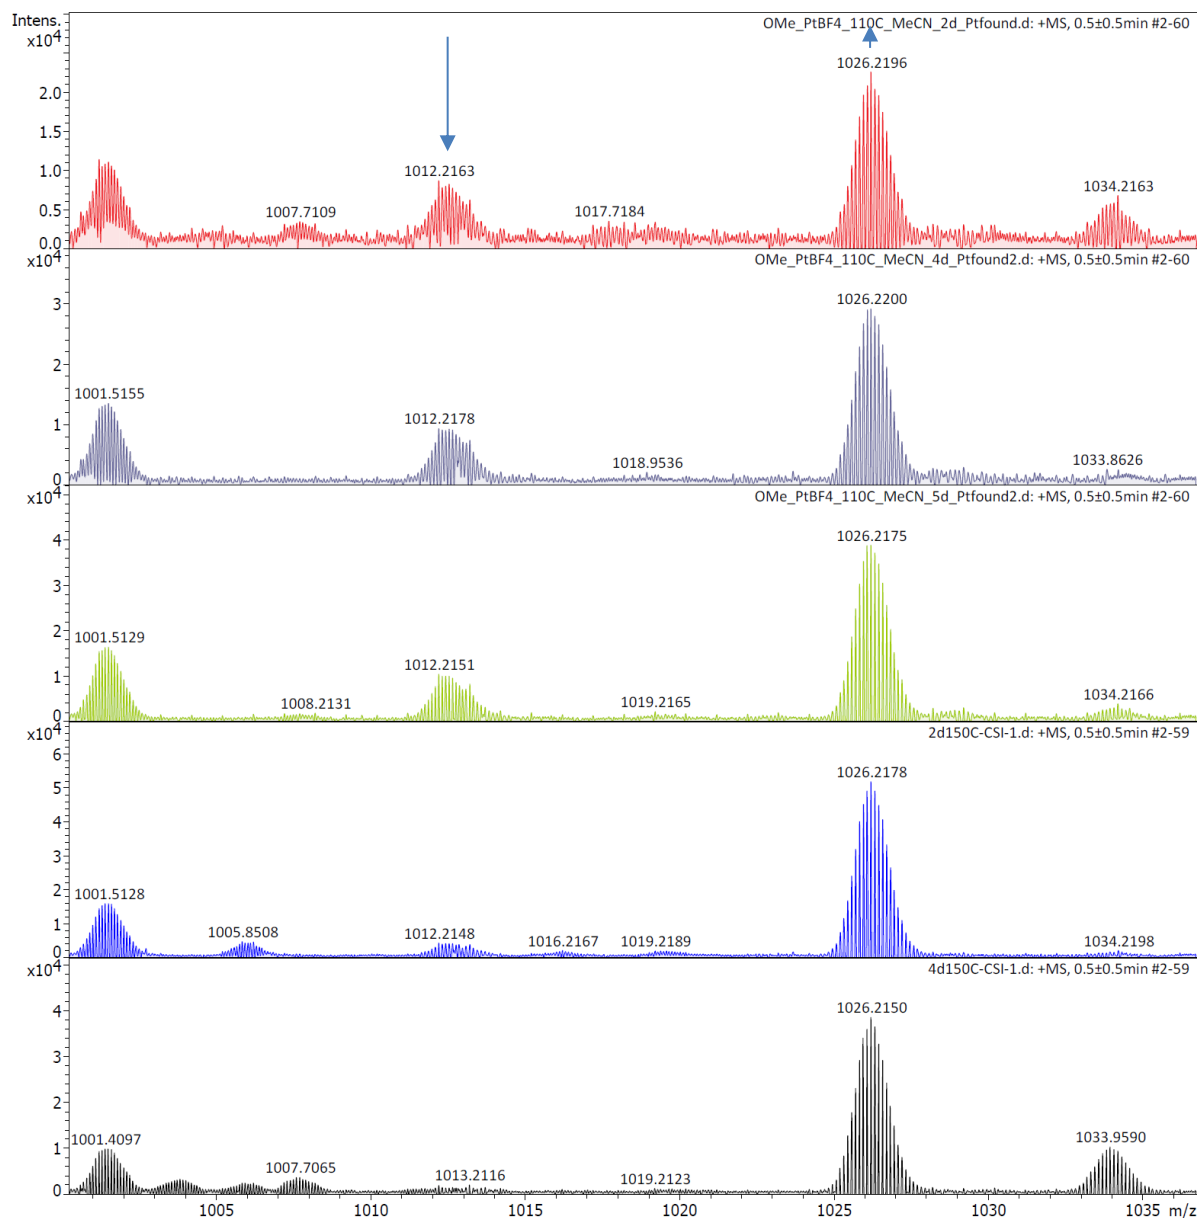

**Figure S68.** Example of collected MS spectra at different stages of self-assembly showing the disappearance of the  $[Pt_{10}(L^{OMe})_{20}]^{9+}$  signal at 1012 Da with increasing temperature and time and the increase of the  $[Pt_9(L^{OMe})_{18}]^{8+}$  signal at 1026 Da.



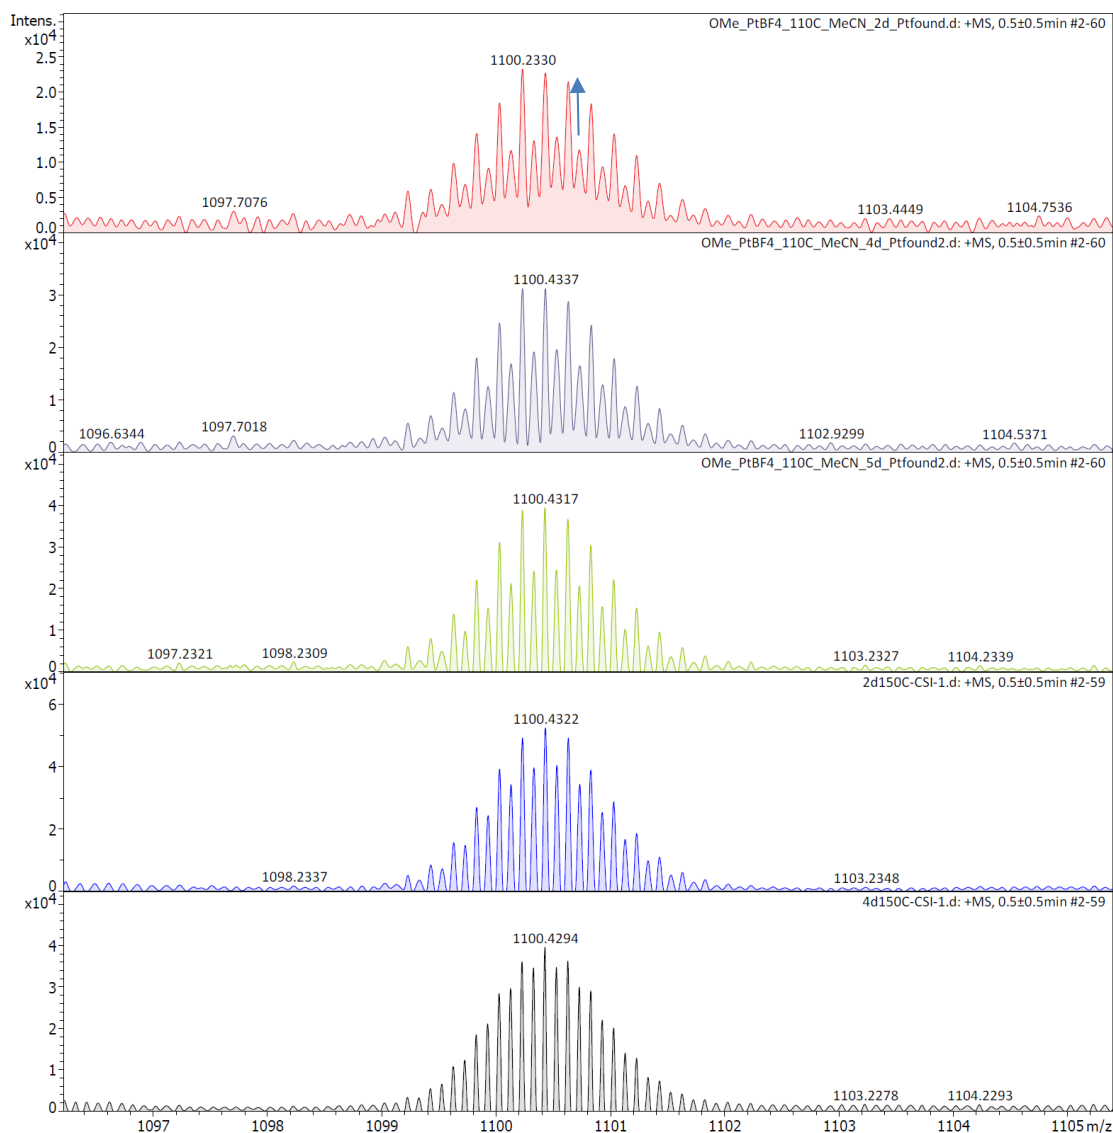

**Figure S69.** Example of collected MS spectra at different stages of self-assembly showing the increase of the  $[\text{Pt}_{12}(\text{L}^{\text{OMe}})_{24}]^{10+}$  signal at 1100 Da with increasing temperature and time and the decrease of the  $[\text{Pt}_6(\text{L}^{\text{OMe}})_{12}]^{5+}$  signal.

**Table S18.** Amount of counts of the  $[\text{Pt}_{12}(\text{L}^{\text{OMe}})_{24}]^{11+}$  signal over a range of temperature and time.

| T        | counts $[\text{Pd}_{12}\text{L}_{24}]^{11+}$ 992Da |
|----------|----------------------------------------------------|
| 70°C-1d  | 0                                                  |
| 85°C-3d  | 4848                                               |
| 110°C-3d | 15462                                              |
| 130°C-3d | 33775                                              |
| 150°C-3d | 56446                                              |
| 150°C-5d | 26653                                              |

**Table S19.** Counts of the individual signals of different type of  $[\text{Pt}_n(\text{L}^{\text{OMe}})_{2n}]^{2n+}$  assemblies over time.

| Sphere type               | 110°C 1d | 110°C 2d | 110°C 3d | 110°C 4d | 110°C 5d | 150°C 1d | 150°C 2d | 150°C 3d | 150°C 4d |
|---------------------------|----------|----------|----------|----------|----------|----------|----------|----------|----------|
| $\text{M}_n\text{L}_{2n}$ |          |          |          |          |          |          |          |          |          |
| 5                         | 0        | 0        | 0        | 0        | 0        | 0        | 0        | 0        | 0        |
| 6                         | 10153    | 9563     | 8791     | 11943    | 14927    | 15186    | 12050    | 9683     | 3903     |
| 7                         | 482      | 0        | 0        | 0        | 0        | 0        | 0        | 0        | 0        |
| 8                         | 12502    | 19873    | 21257    | 26109    | 32709    | 40954    | 39905    | 41377    | 26230    |
| 9                         | 12726    | 22501    | 24639    | 29876    | 38570    | 49144    | 51826    | 55628    | 38459    |
| 10                        | 6906     | 8687     | 8446     | 9144     | 9992     | 7213     | 4268     | 3265     | 0        |
| 11                        | 5874     | 9568     | 9814     | 12337    | 15534    | 16672    | 14822    | 14160    | 7757     |
| 12                        | 7403     | 13596    | 15462    | 19611    | 24454    | 38605    | 49367    | 56446    | 46554    |

### Error considerations of mass quantification

In order to estimate an error which can be expected for the individual assemblies, three different sphere solutions were prepared by heating two different batches of  $\text{L}^{\text{OMe}}$  with two different batches of  $[\text{Pt}(\text{BF}_4)_2(\text{MeCN})_4]$  at 110°C for 1d. The relative intensity of the individual assemblies varied in the obtained spectra  $\pm 3\%$  which corresponds to an error of 10% for the individual assemblies. Whereas this error is rather big in the context of quantification of the individual assemblies, the obtained data was qualitatively three times reproduced. A similar trend is also the case if a different set of signals is used for the quantification of the assemblies. As our setting allowed well resolved peaks in the region between 900-1200 Da, we focused on individual signals in this region. Instead also other signals can be used for the quantification leading to similar results as depicted in S64.

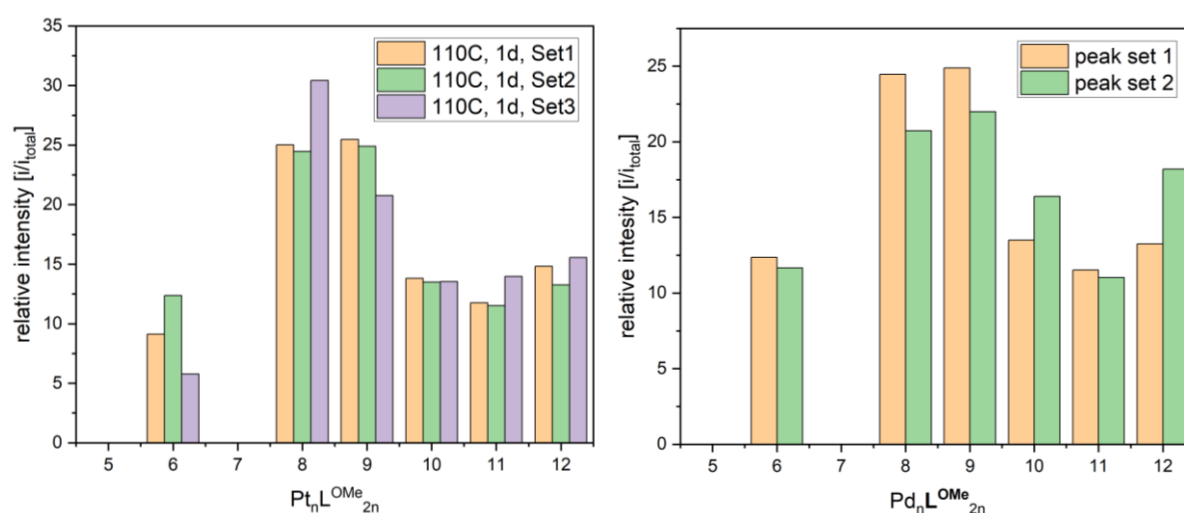

**Figure S70.** Left: relative intensity for different sized assemblies in three unique performed experiments. Right: Distribution of different sized assemblies depending on the individual peaks used for their quantification.

The machine intensity error was estimated by performing 10 individual measurements on the same sample and comparison of the obtained intensities.

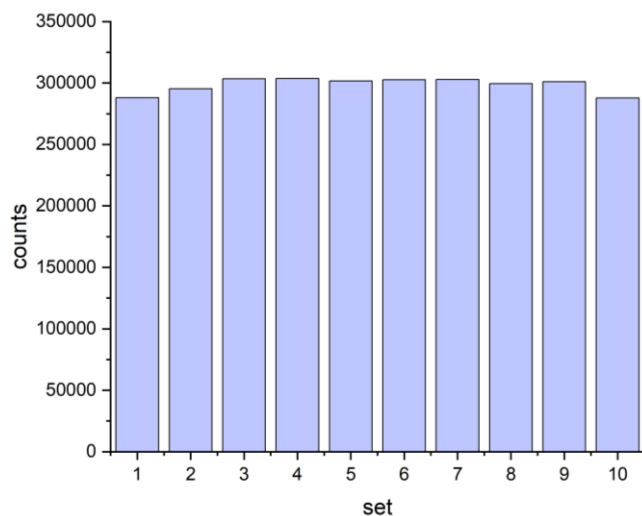

**Figure S71.** Measured intensity for a certain peak of a self-assembly. After each measurement, the machine was cleaned and flushed with acetonitrile before the next set was measured.

This set of measurement suggest a machine error of 3%, which is below the individual error obtained from different set of experiments (which is 10% as suggested before).

#### $[\text{Pt}_n(\text{L}^{\text{OMe}})_{2n}]^{2n+}(\text{BF}_4^-)_{2n}$ with addition of 2-chloropyridine

A samples containing a solution of  $\text{L}^{\text{OMe}}$  (3.1 mg, 10  $\mu\text{mol}$ , 1 eq.) and 2-chloropyridine (1.1 mg, 1  $\mu\text{mol}$ , 0.1 eq.) in 0.5 mL  $\text{MeCN-d}_3$  and  $[\text{Pt}(\text{BF}_4)_2(\text{MeCN})_4]$  (2.93 mg, 5.5  $\mu\text{mol}$ , 0.55 eq.) in 0.5 mL  $\text{MeCN-d}_3$  was prepared. The solution was then stirred at 150°C for 24h in a 10 mL high pressure tube. The MS spectra of the resulting solution was compared to a sample not containing 2-chloropyridine. Both samples contained a similar distribution of spheres.

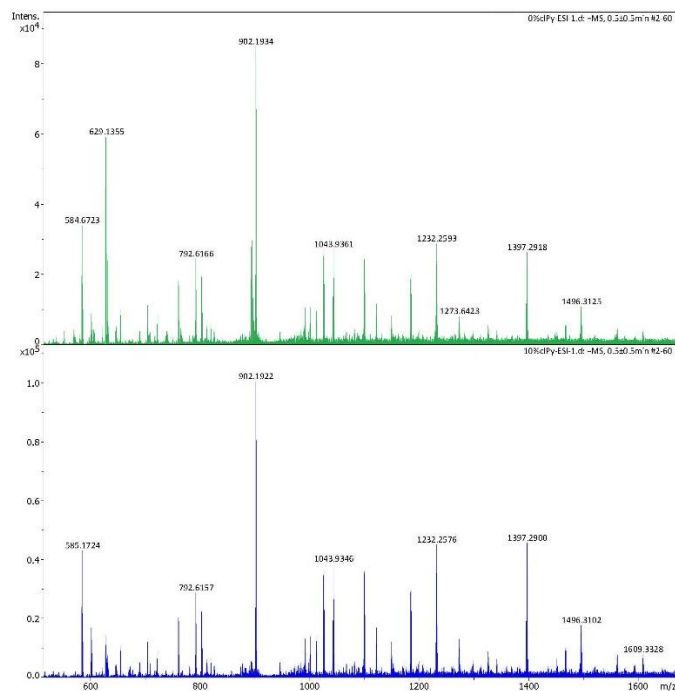

**Figure S72.** Comparison of two samples of  $[\text{Pt}_n(\text{LOMe})_{2n}]^{2n+}(\text{BF}_4^-)_{2n}$  containing either 10% 2-chloropyridine as destabilizing agent (bottom) or no destabilizing agent (top).

$[\text{Pt}_n(\text{LOMe})_{2n}]^{2n+}(\text{BF}_4^-)_{2n}$  decomposition at elevated temperatures

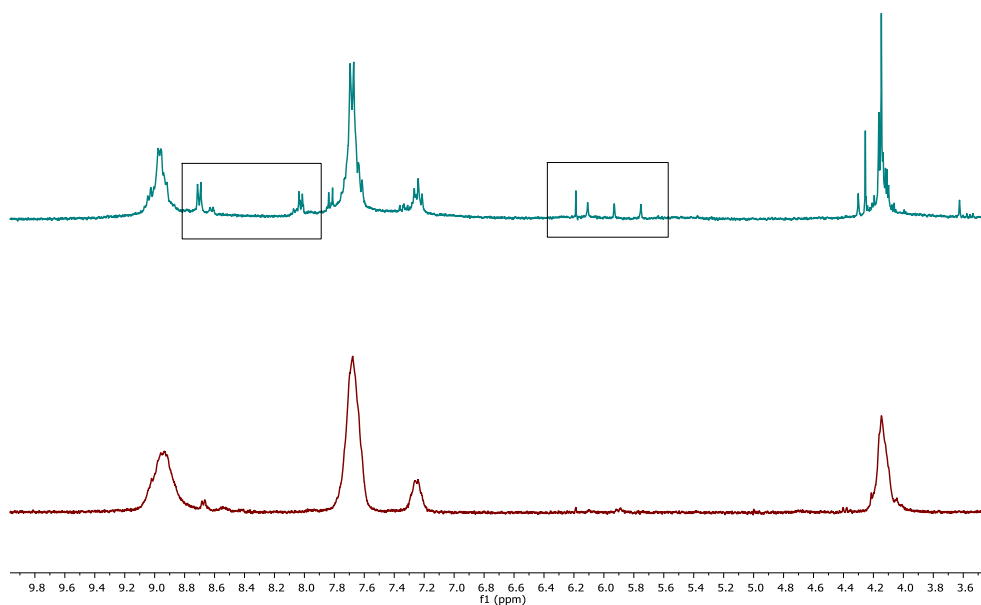

**Figure S73.** Comparison of free  $[\text{Pt}_n(\text{LOMe})_{2n}]^{4n+}(\text{BF}_4^-)_{4n}$  sphere prepared at 110°C for 3d (bottom) and  $[\text{Pt}_n(\text{LOMe})_{2n}]^{4n+}(\text{BF}_4^-)_{4n}$  sphere prepared at 170°C for 3d (top),  $^1\text{H}$  NMR in  $\text{MeCN-d}_3$ . Squares mark free building block and organic decomposition products.

$[\text{Pt}_n(\text{LOMe})_{2n}]^{2n+}(\text{BF}_4^-)_{2n}$  prepared at 70°C

A samples containing a solution of  $\text{LOMe}$  (3.1 mg, 10  $\mu\text{mol}$ , 1 eq.) in 0.5 mL  $\text{MeCN-d}_3$  and  $[\text{Pt}(\text{BF}_4)_2(\text{MeCN})_4]$  (2.93 mg, 5.5  $\mu\text{mol}$ , 0.55 eq.) in 0.5 mL  $\text{MeCN-d}_3$  was prepared. The solution was then stirred at 70°C for 3d in a 10 mL high pressure tube.  $^1\text{H NMR}$  (300 MHz, Acetonitrile- $d_3$ )  $\delta$  9.20 – 8.53 (m, 5H), 7.88 – 7.46 (m, 6H), 7.26 (s, 1H), 4.32 – 3.87 (m, 3H).

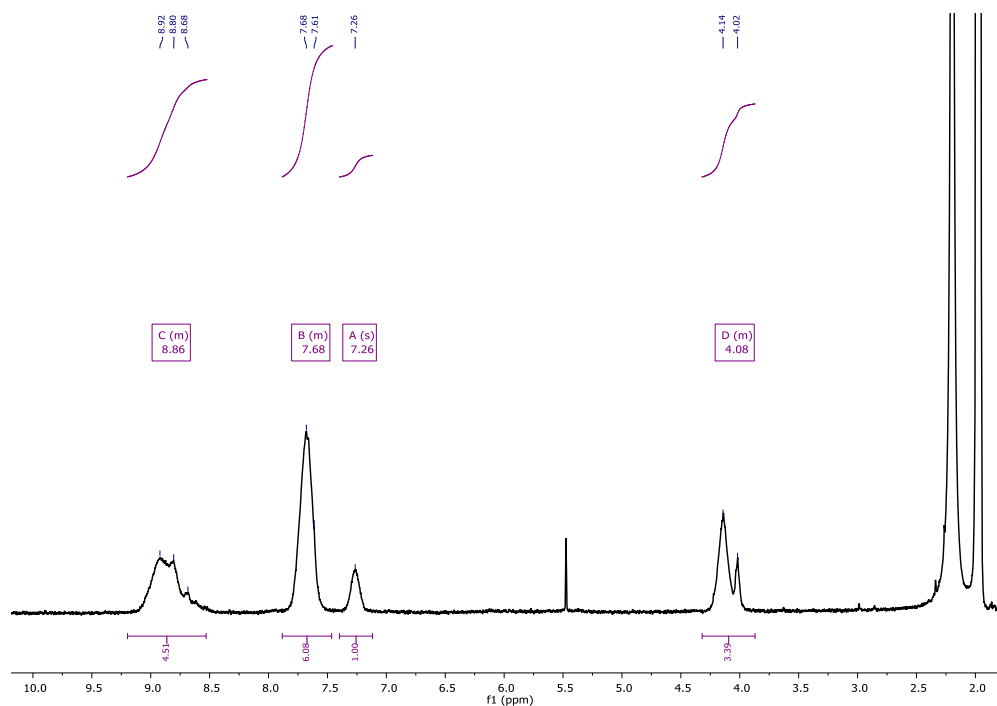

**Figure S74.**  $\text{LOMe}$  + “Pt” precursor heated at 70°C for 3d,  $^1\text{H NMR}$  in  $\text{MeCN-d}_3$ .

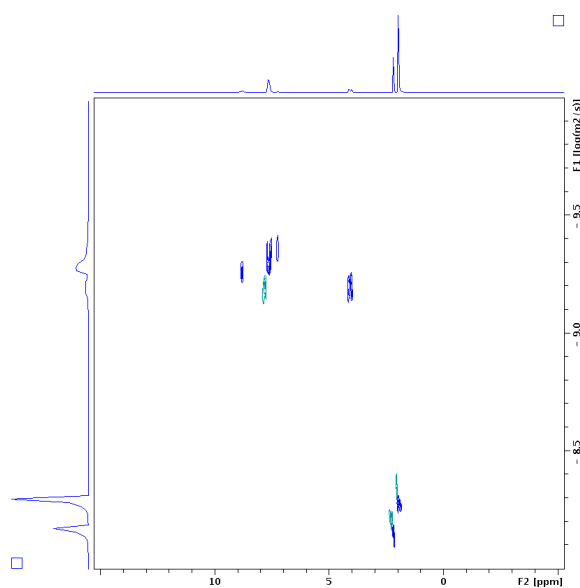

**Figure S75.** “Pt” +  $\text{LOMe}$  complex prepared at 70°C, DOSY in  $\text{MeCN-d}_3$  at 25°C.

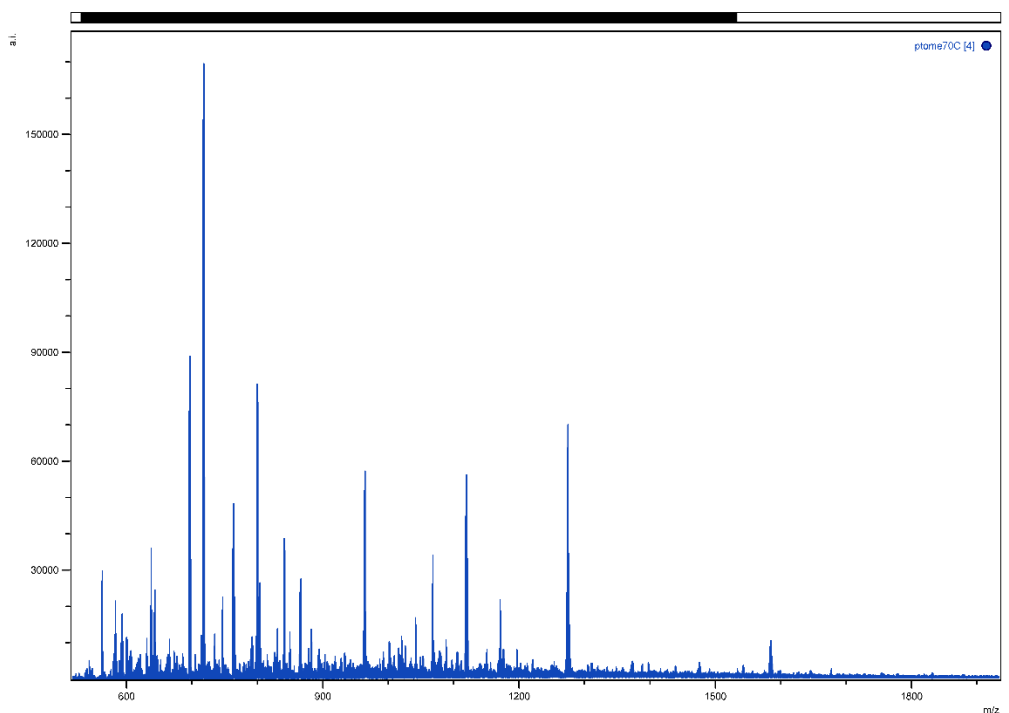

**Figure S76.** MS spectra of a sample of “Pt” + L<sup>OMe</sup> mixed and heated at 70°C for 3d, showing absence of characteristic sphere signals.

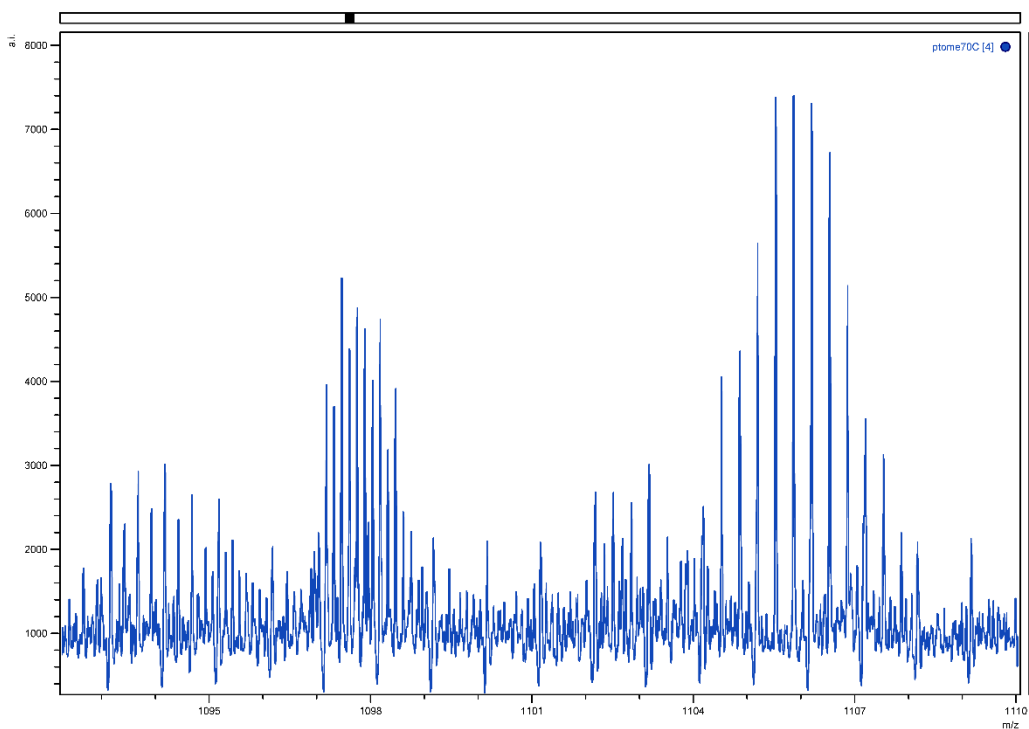

**Figure S77.** Zoom in into the 1100 region of the MS spectra of a sample of “Pt” + L<sup>OMe</sup> mixed and heated at 70°C for 3d, showing absence of the characteristic 1100 signal otherwise obtained for [Pt<sub>6</sub>(L<sup>OMe</sup>)<sub>12</sub>]<sup>5+</sup>.

$[\text{Pt}_n(\text{L}^{\text{Imi}})_{2n}]^{2n+}(\text{BF}_4^-)_{2n}$  prepared at 85°C

To a solution of  $\text{L}^{\text{Imi}}$  (5.20 mg, 10  $\mu\text{mol}$ , 1 eq.) in 0.5 mL  $\text{MeCN-d}_3$ ,  $[\text{Pt}(\text{BF}_4)_2(\text{MeCN})_4]$  (2.93 mg, 5.5  $\mu\text{mol}$ , 0.55 eq.) in 0.5 mL  $\text{MeCN-d}_3$  was added. The solution was then stirred at 85°C for 1d in a 10 mL high pressure tube.

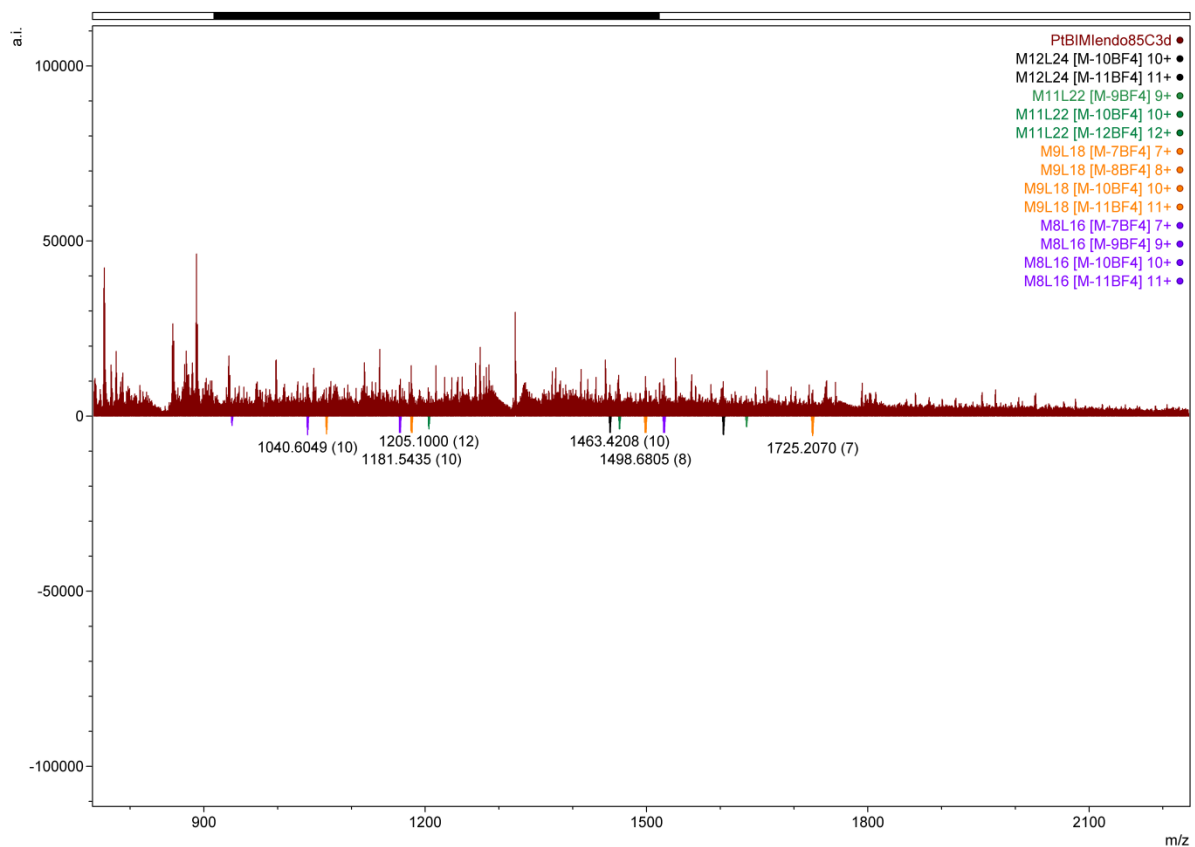

**Figure S78.** Full ESI-MS spectra of  $[\text{Pt}_n(\text{L}^{\text{Imi}})_{2n}]^{2n+}(\text{BF}_4^-)_{2n}$  prepared at 85°C for 1d. Below the simulated spectra, above obtained spectra.

**Table S20.** Zoom into different charged species of  $[\text{Pt}_{12}(\text{L}^{\text{Imi}})_{24}]^{24+}$  assembly of a sample prepared at 85°C for 1d.

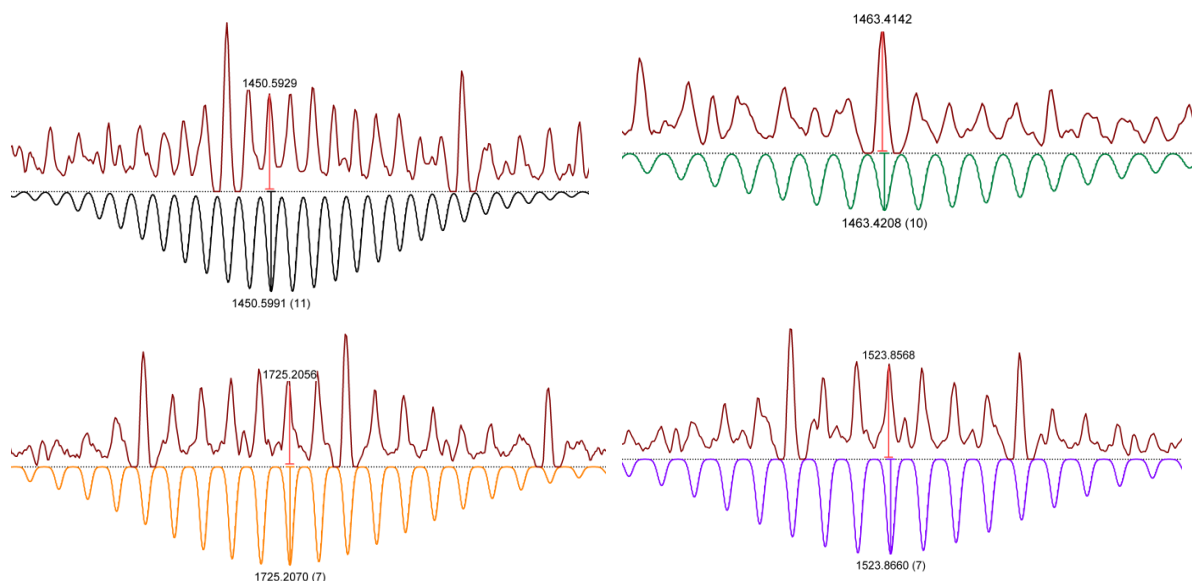

## Ligand exchange studies (SI4)

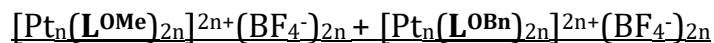

Different samples containing a solution of  $\text{L}^{\text{OMe}}$  (3.1 mg, 10  $\mu\text{mol}$ , 1 eq.) in 0.5 mL  $\text{MeCN-d}_3$  and  $[\text{Pt}(\text{BF}_4)_2(\text{MeCN})_4]$  (2.93 mg, 5.5  $\mu\text{mol}$ , 0.55 eq.) in 0.5 mL  $\text{MeCN-d}_3$  or  $\text{L}^{\text{OBn}}$  (3.86 mg, 10  $\mu\text{mol}$ , 1 eq.) in 0.5 mL  $\text{MeCN-d}_3$  and  $[\text{Pt}(\text{BF}_4)_2(\text{MeCN})_4]$  (2.93 mg, 5.5  $\mu\text{mol}$ , 0.55 eq.) in 0.5 mL  $\text{MeCN-d}_3$  were prepared. The solution was then stirred at either room temperature, 85°C or 110°C for 24h. The resulting solutions were analyzed before being mixed in a 1 to 1 ratio and heated to 150°C for 24h. After that all individual solutions were analyzed again with  $^1\text{H}$  NMR, DOSY and MS.



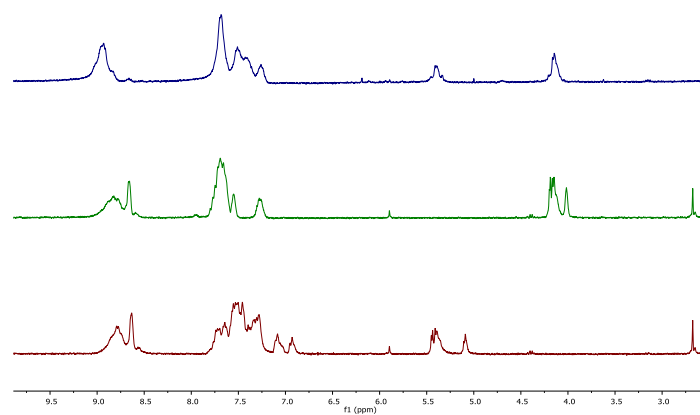

**Figure S79.** Stacked spectra of  $[\text{Pt}_n(\text{L}^{\text{OBn}})_{2n}]^{2n+}(\text{BF}_4^-)_{2n}$  (bottom) prepared at 25°C,  $[\text{Pt}_n(\text{L}^{\text{OMe}})_{2n}]^{2n+}(\text{BF}_4^-)_{2n}$  (middle) prepared at 25°C and 1 to 1 solution heated at 150°C for 24h (top),  $^1\text{H}$  NMR in  $\text{MeCN-d}_3$ .

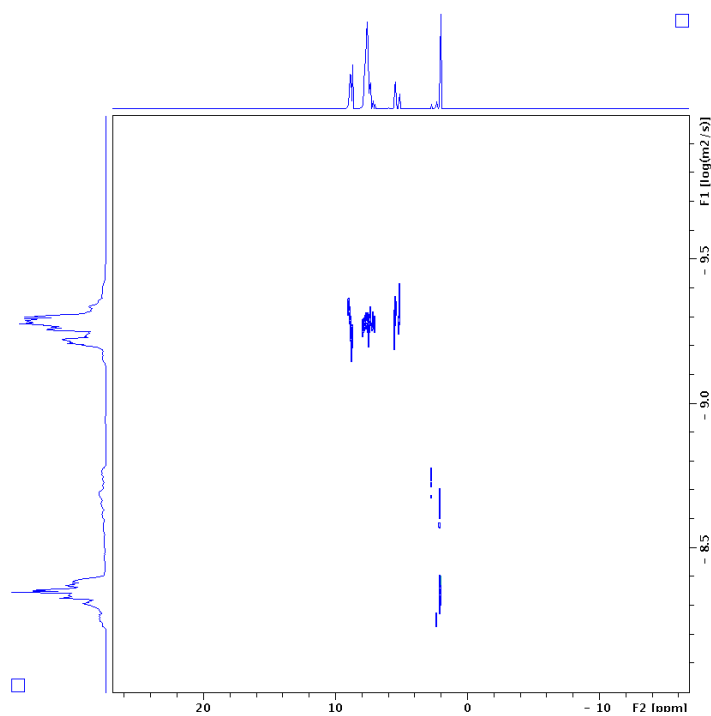

**Figure S80.**  $[\text{Pt}_n(\text{L}^{\text{OBn}})_{2n}]^{2n+}(\text{BF}_4^-)_{2n}$  cage prepared at 25°C, DOSY in  $\text{MeCN-d}_3$  at 25°C.

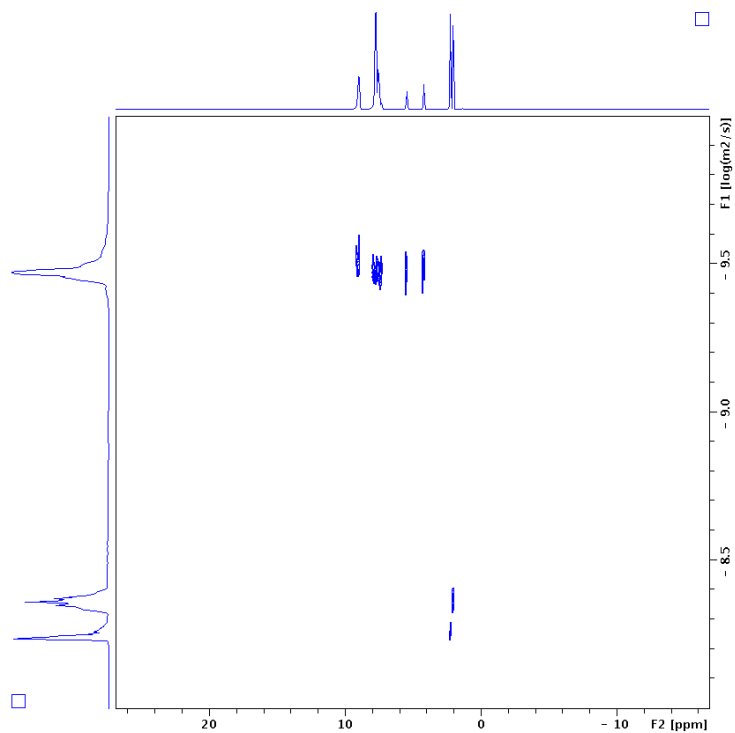

**Figure S81.**  $[\text{Pt}_n(\text{L}^{\text{OBn}})_{2n}]^{2n+}(\text{BF}_4^-)_{2n} + [\text{Pt}_n(\text{L}^{\text{OMe}})_{2n}]^{2n+}(\text{BF}_4^-)_{2n}$  cages (1:1) prepared at 25°C mixed and heated to 150°C for 24 h, DOSY in  $\text{MeCN-d}_3$  at 25°C.

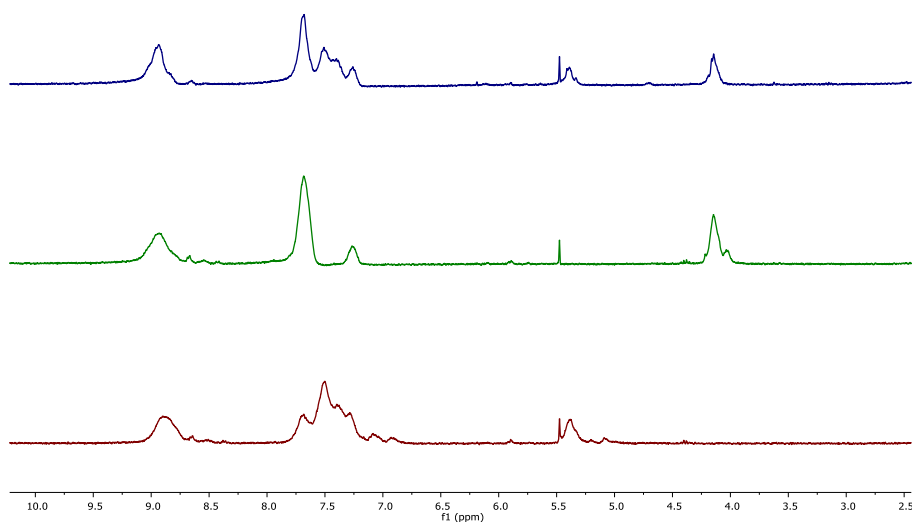

**Figure S82.** Stacked spectra of  $[\text{Pt}_n(\text{L}^{\text{OBn}})_{2n}]^{2n+}(\text{BF}_4^-)_{2n}$  (bottom) prepared at 85°C,  $[\text{Pt}_n(\text{L}^{\text{OMe}})_{2n}]^{2n+}(\text{BF}_4^-)_{2n}$  (middle) prepared at 85°C and 1 to 1 solution heated at 150°C for 24h (top),  $^1\text{H}$  NMR in  $\text{MeCN-d}_3$ .

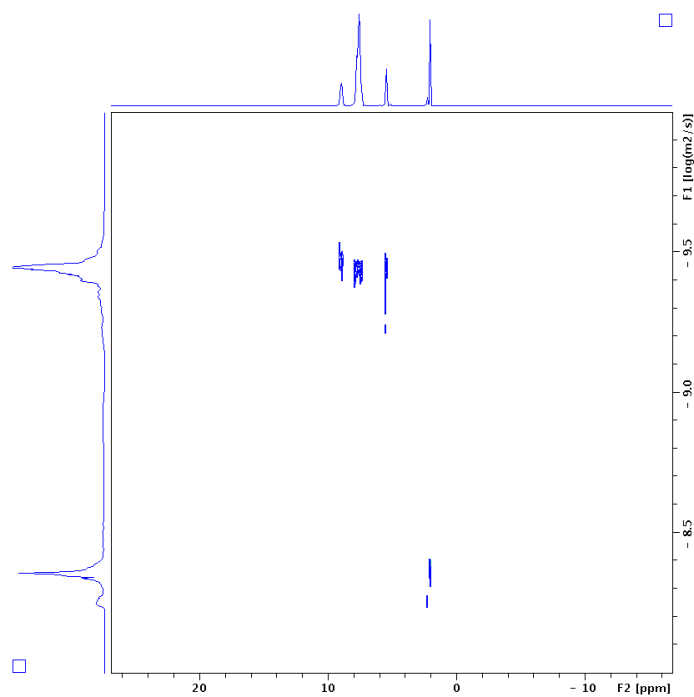

**Figure S83.**  $[\text{Pt}_n(\text{L}^{\text{OBn}})_{2n}]^{2n+}(\text{BF}_4^-)_{2n}$  cage prepared at 85°C, DOSY in  $\text{MeCN-d}_3$  at 25°C.

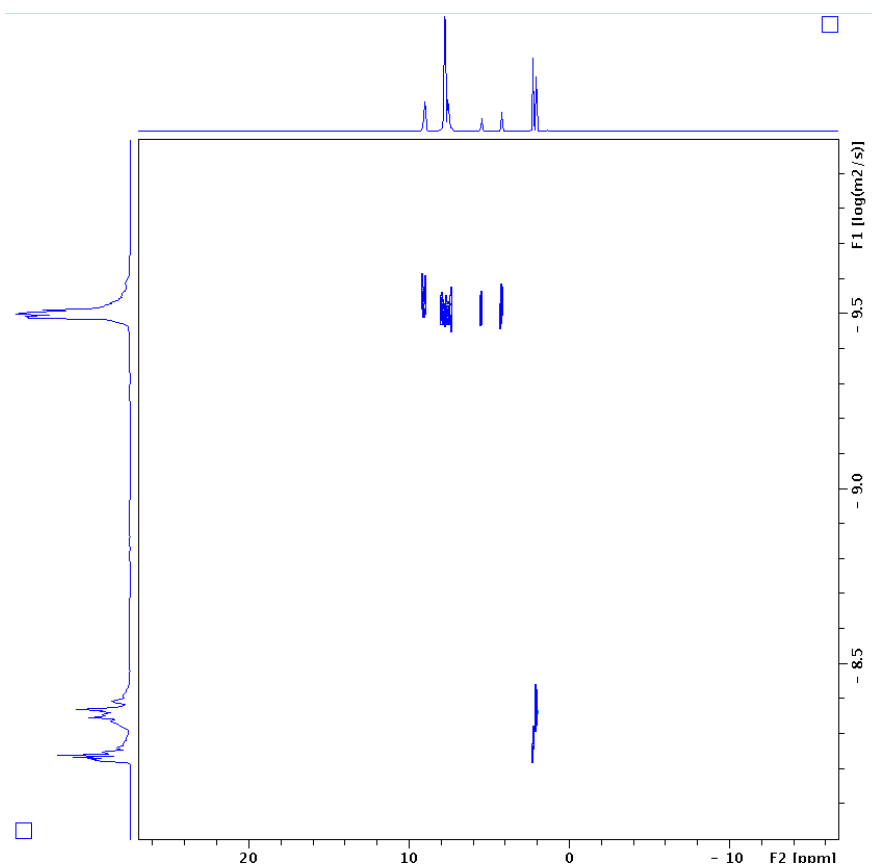

**Figure S84.**  $[\text{Pt}_n(\text{L}^{\text{OBn}})_{2n}]^{2n+}(\text{BF}_4^-)_{2n} + [\text{Pt}_n(\text{L}^{\text{OMe}})_{2n}]^{2n+}(\text{BF}_4^-)_{2n}$  cages (1:1) prepared at 85°C mixed and heated to 150°C for 24 h, DOSY in  $\text{MeCN-d}_3$  at 25°C.

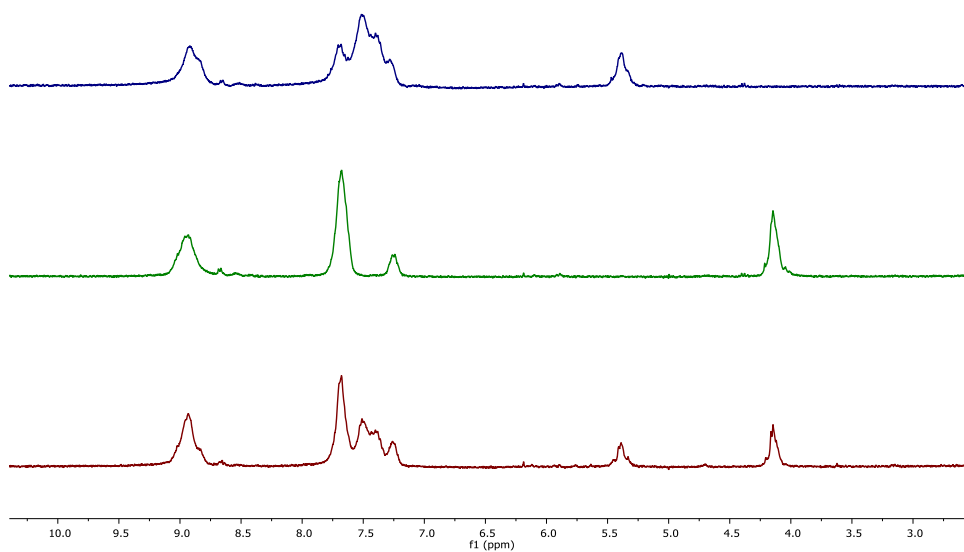

**Figure S85.** Stacked spectra of  $[\text{Pt}_n(\text{L}^{\text{OBn}})_{2n}]^{2n+}(\text{BF}_4^-)_{2n}$  (bottom) prepared at  $110^\circ\text{C}$ ,  $[\text{Pt}_n(\text{L}^{\text{OMe}})_{2n}]^{2n+}(\text{BF}_4^-)_{2n}$  (middle) prepared at  $110^\circ\text{C}$  and 1 to 1 solution heated at  $150^\circ\text{C}$  for 24h (top),  $^1\text{H}$  NMR in  $\text{MeCN-d}_3$ .

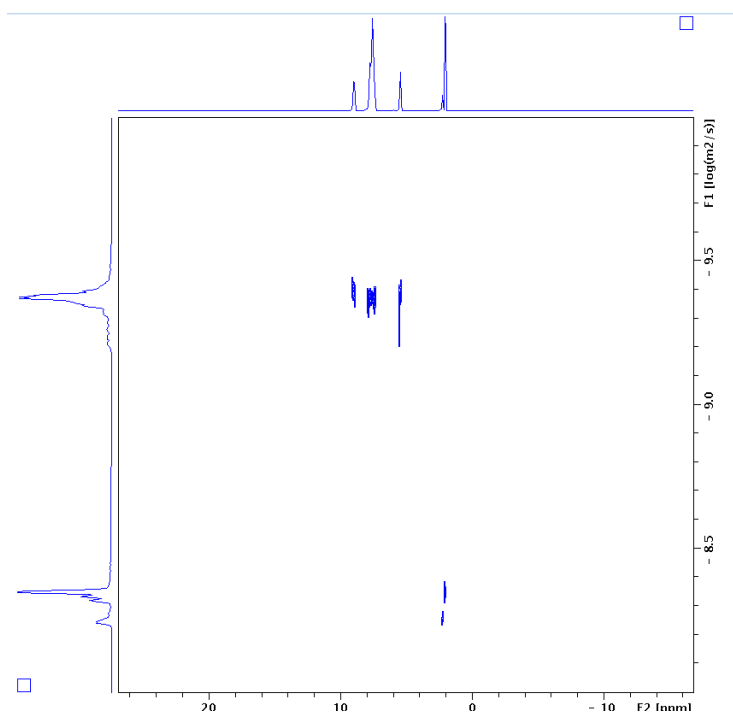

**Figure S86.**  $[\text{Pt}_n(\text{L}^{\text{OBn}})_{2n}]^{2n+}(\text{BF}_4^-)_{2n}$  cage prepared at  $110^\circ\text{C}$ , DOSY in  $\text{MeCN-d}_3$  at  $25^\circ\text{C}$ .

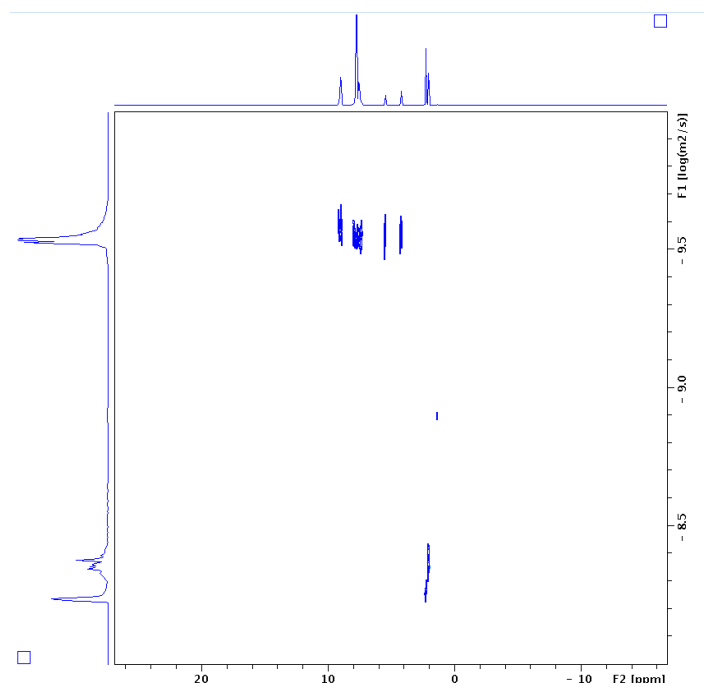

**Figure S87.**  $[\text{Pt}_n(\text{L}^{\text{OBn}})_{2n}]^{2n+}(\text{BF}_4^-)_{2n} + [\text{Pt}_n(\text{L}^{\text{OMe}})_{2n}]^{2n+}(\text{BF}_4^-)_{2n}$  cages (1:1) prepared at 110°C mixed and heated to 150°C for 24 h, DOSY in  $\text{MeCN-d}_3$  at 25°C.

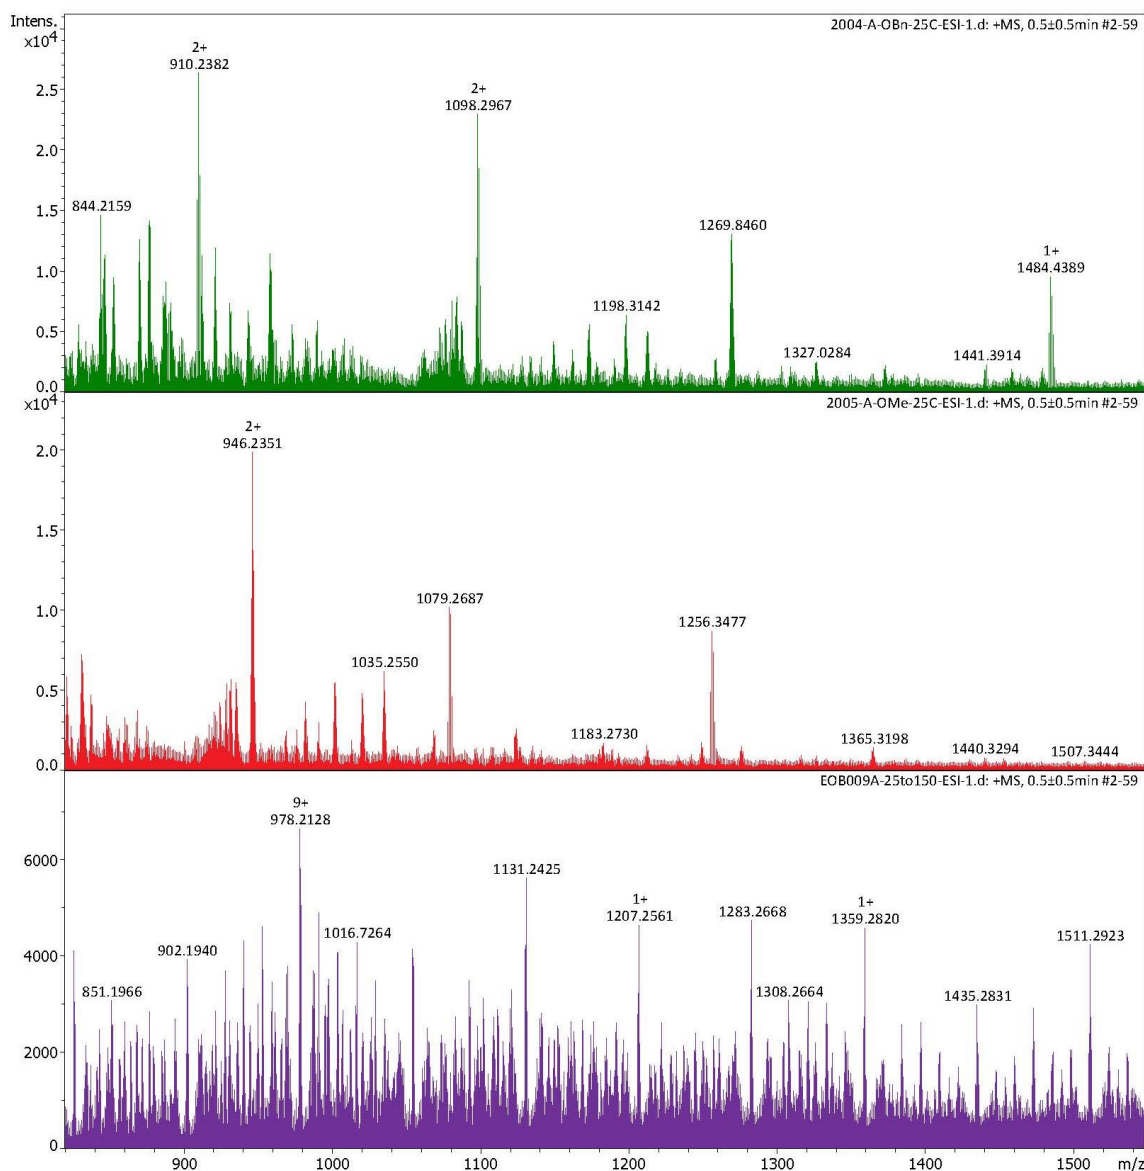

**Figure S88.** Example of collected MS spectra before and after heating two assemblies which were prepared at room temperature showing the emerge of spherical complexes with random distribution after heating the mixture at 150°C.

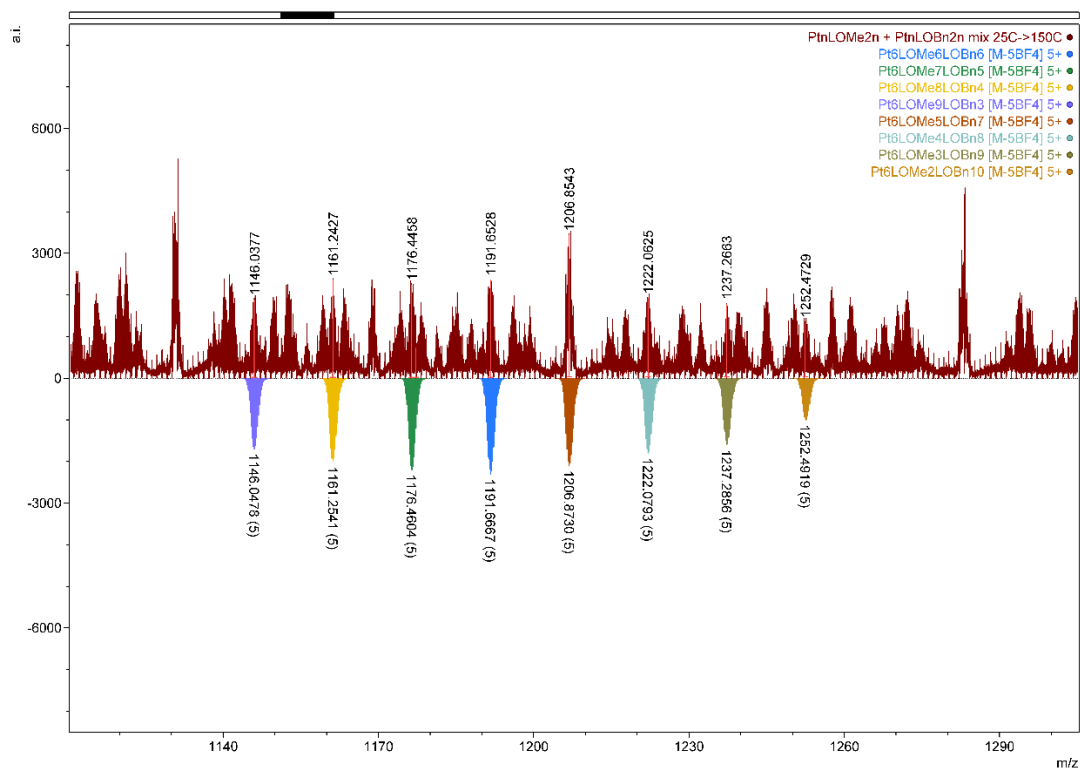

**Figure S89.** Distribution of the two ligands in M<sub>6</sub>L<sub>12</sub> assemblies (25°C to 150°C).

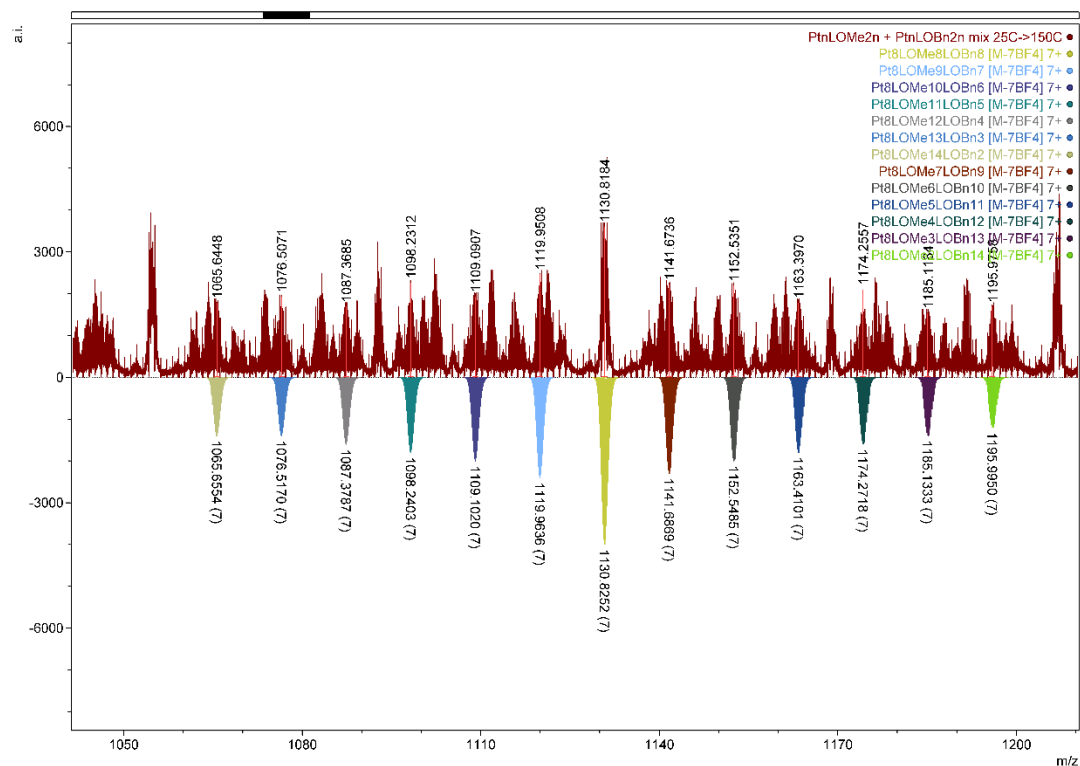

**Figure S90.** Distribution of the two ligands in M<sub>8</sub>L<sub>16</sub> assemblies (25°C to 150°C).

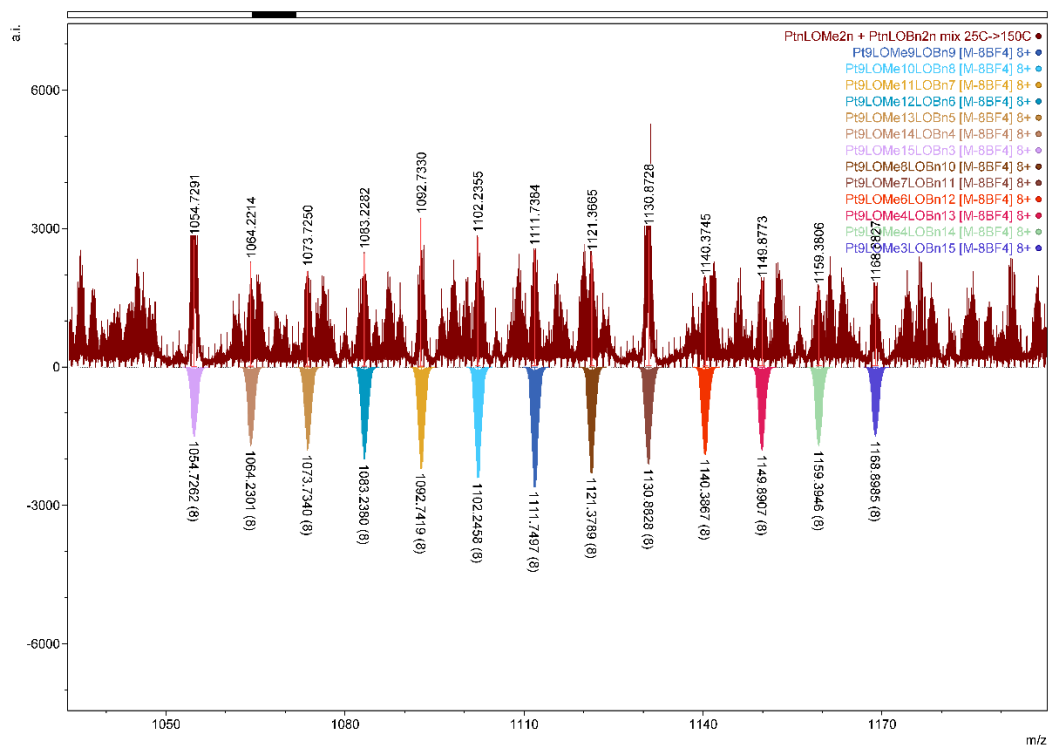

**Figure S91.** Distribution of the two ligands in  $M_9L_{18}$  assemblies (25°C to 150°C).



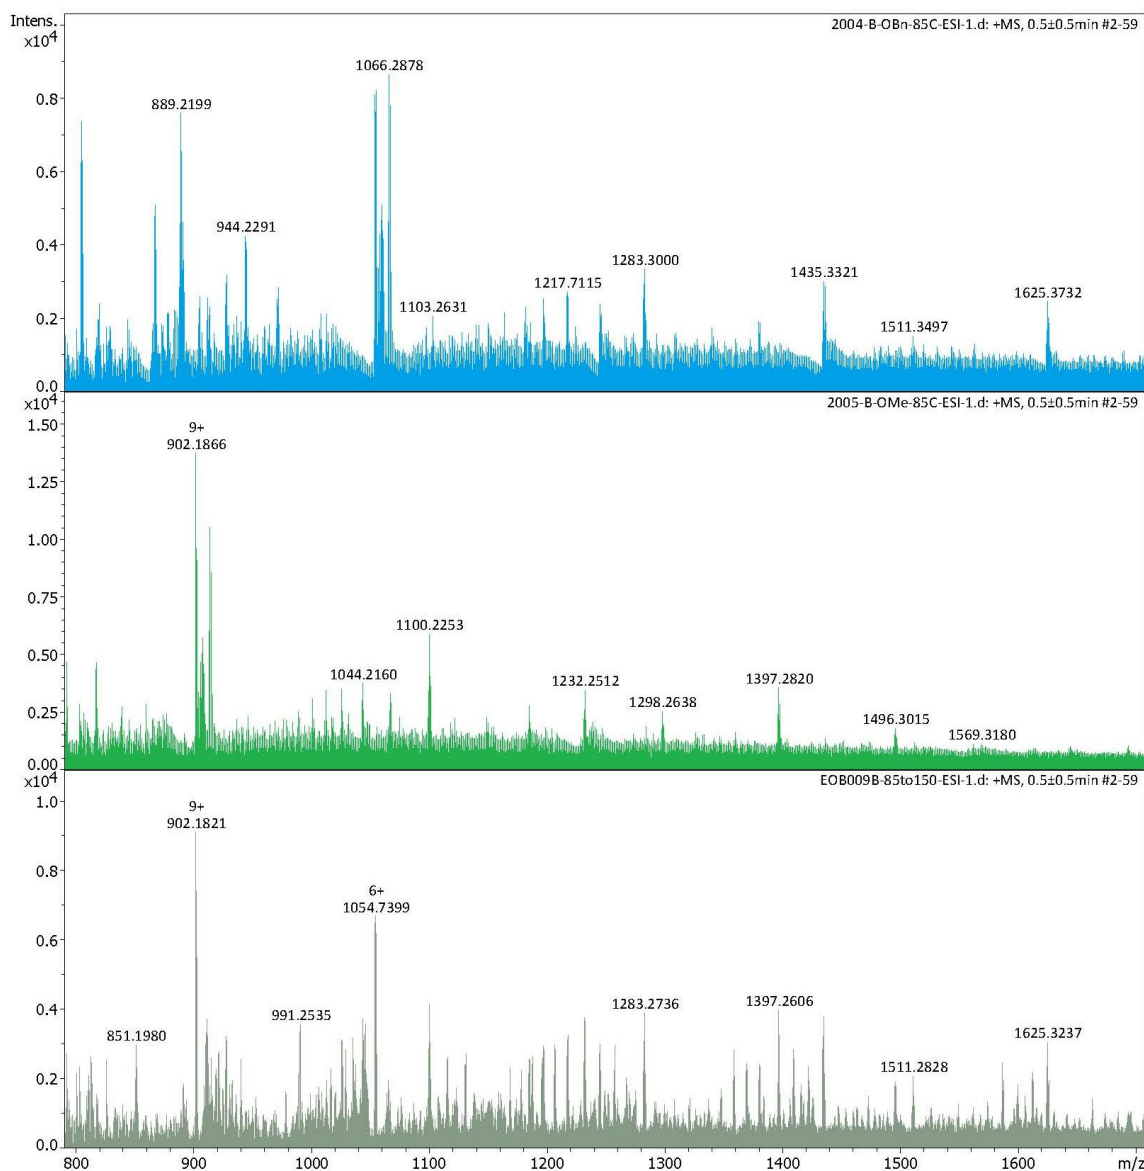

**Figure S92.** Example of collected MS spectra before and after heating two assemblies which were prepared at 85°C and then heated at 150°C.

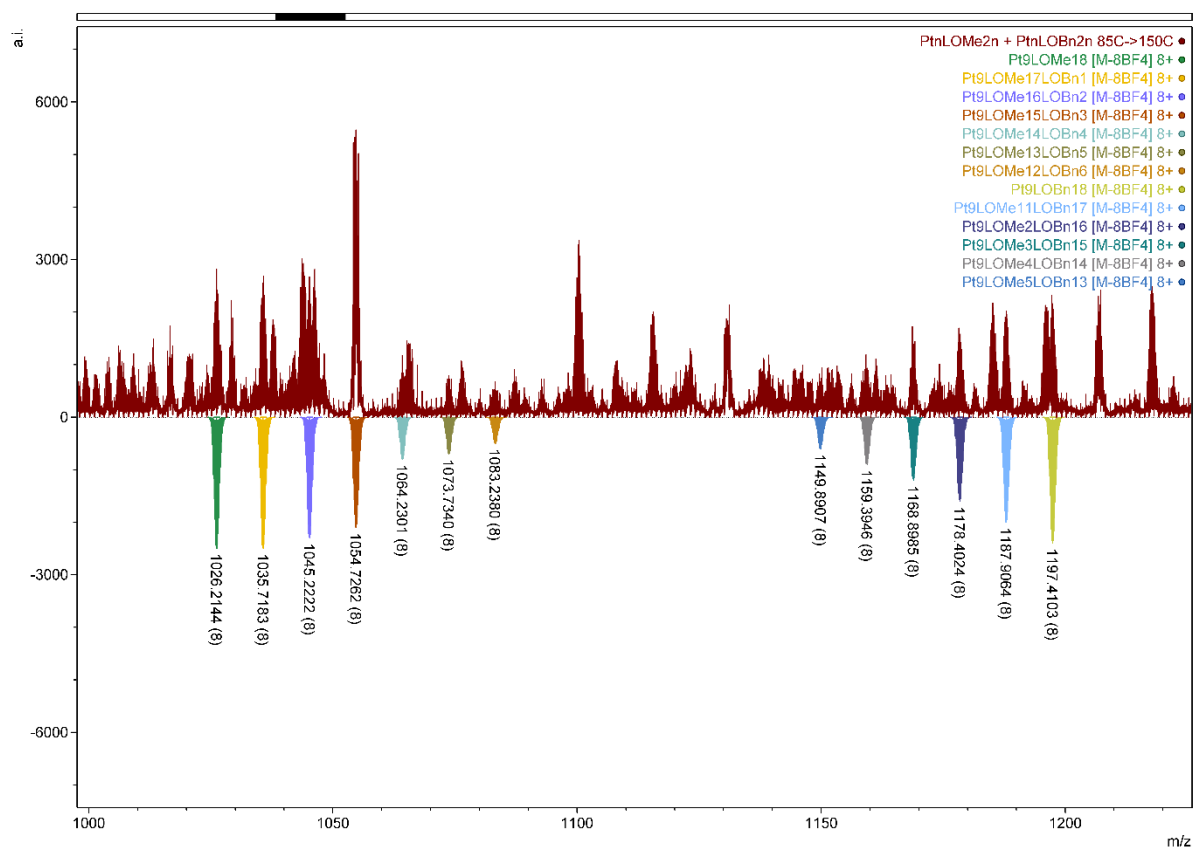

**Figure S93.** Distribution of the two ligands in  $M_9L_{18}$  assemblies (85°C to 150°C).

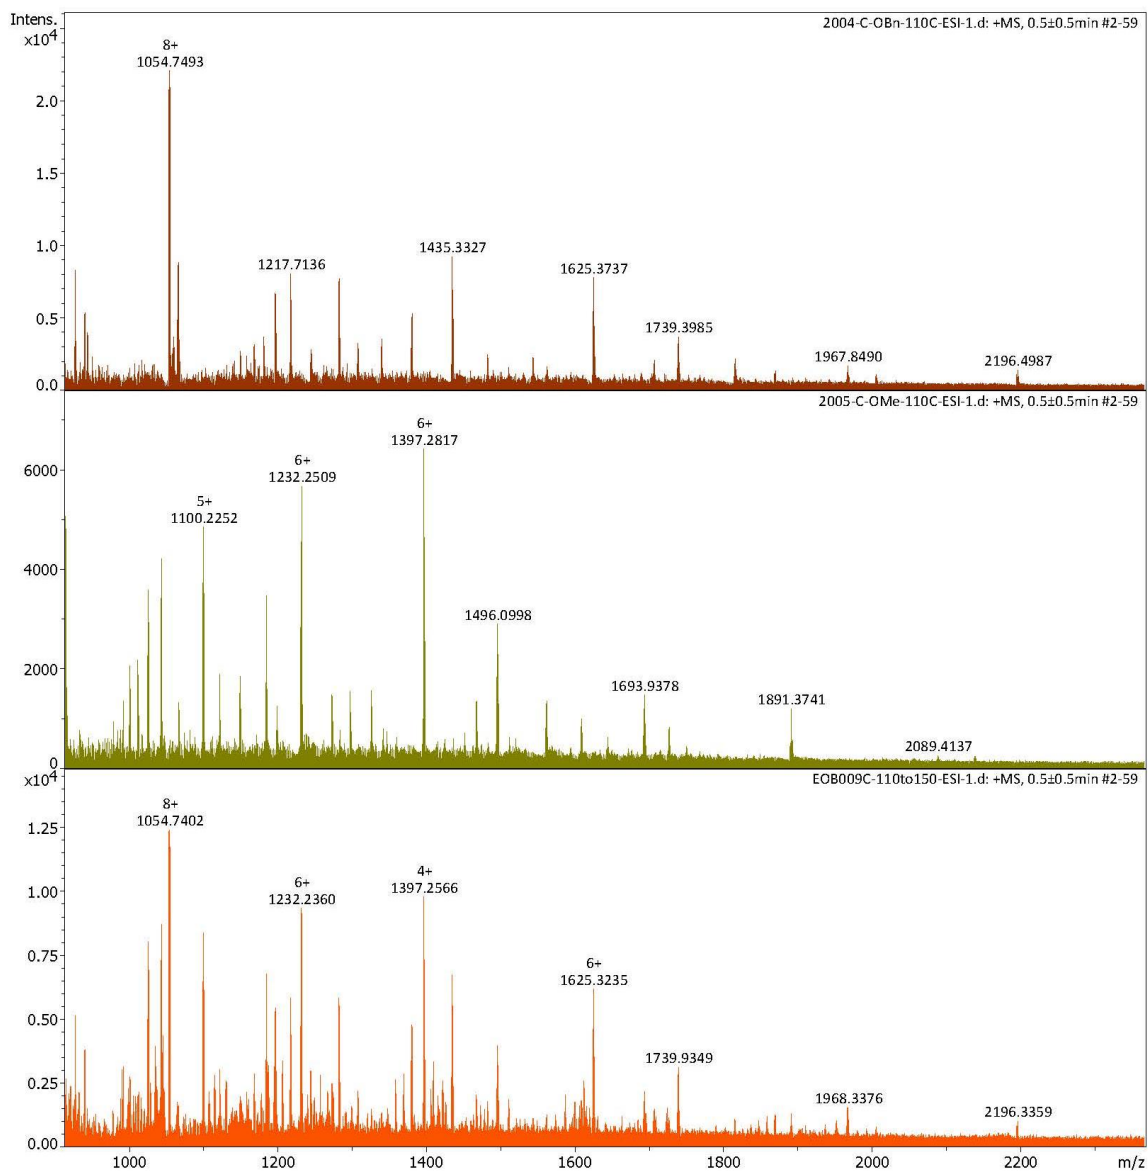

**Figure S94.** Example of collected MS spectra before and after heating two assemblies which were prepared at 110°C and then heated at 150°C.

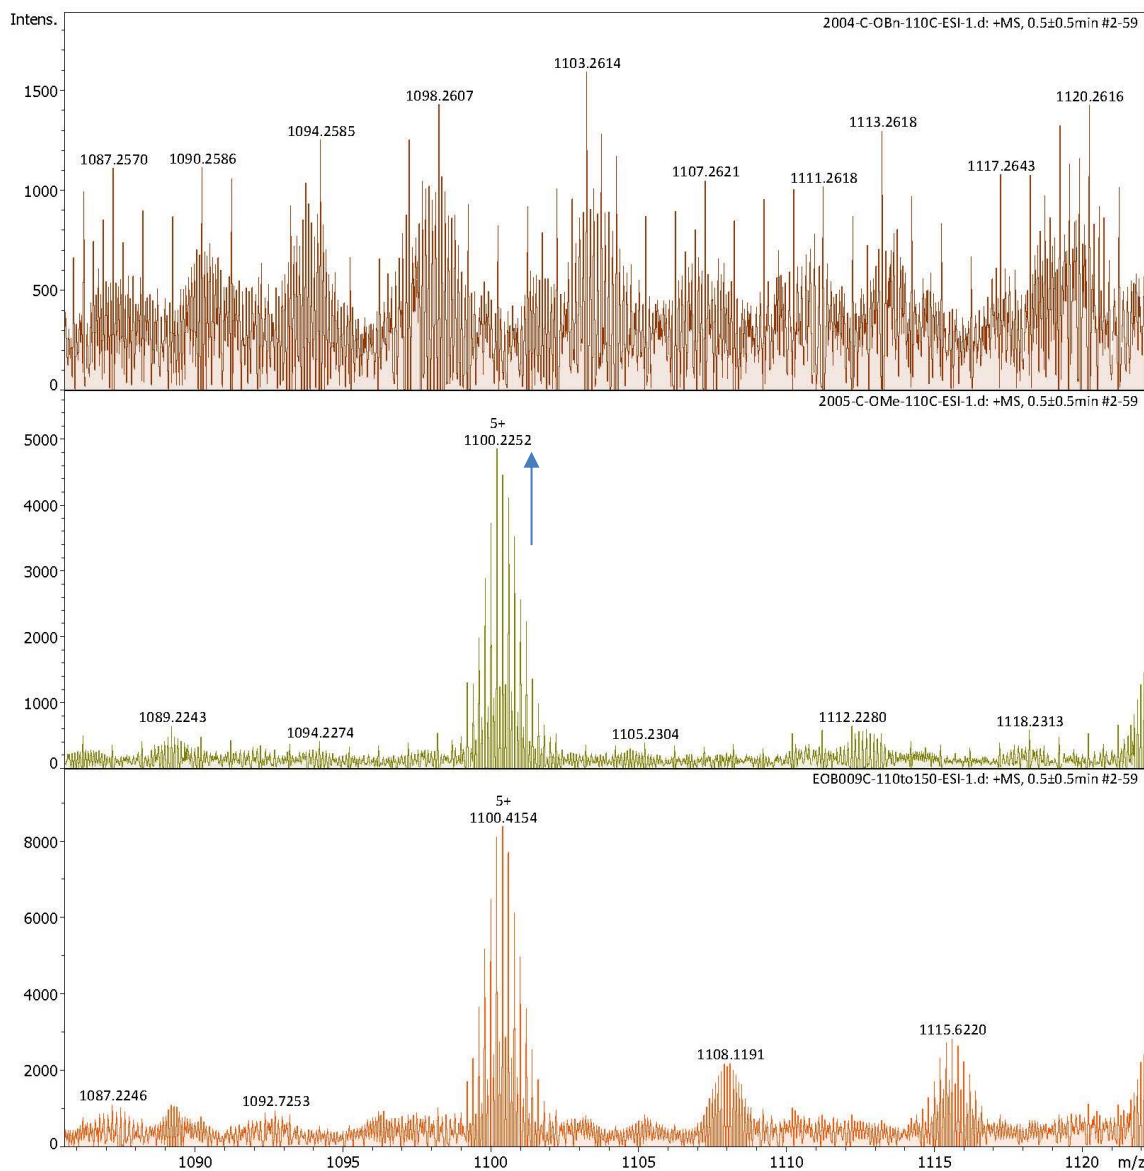

**Figure S95.** Example of collected MS spectra before and after heating two assemblies which were prepared at 110°C and then heated at 150°C. Zoom into 1100 region to show formation of more spherical objects after heating the mixture at 150°C.

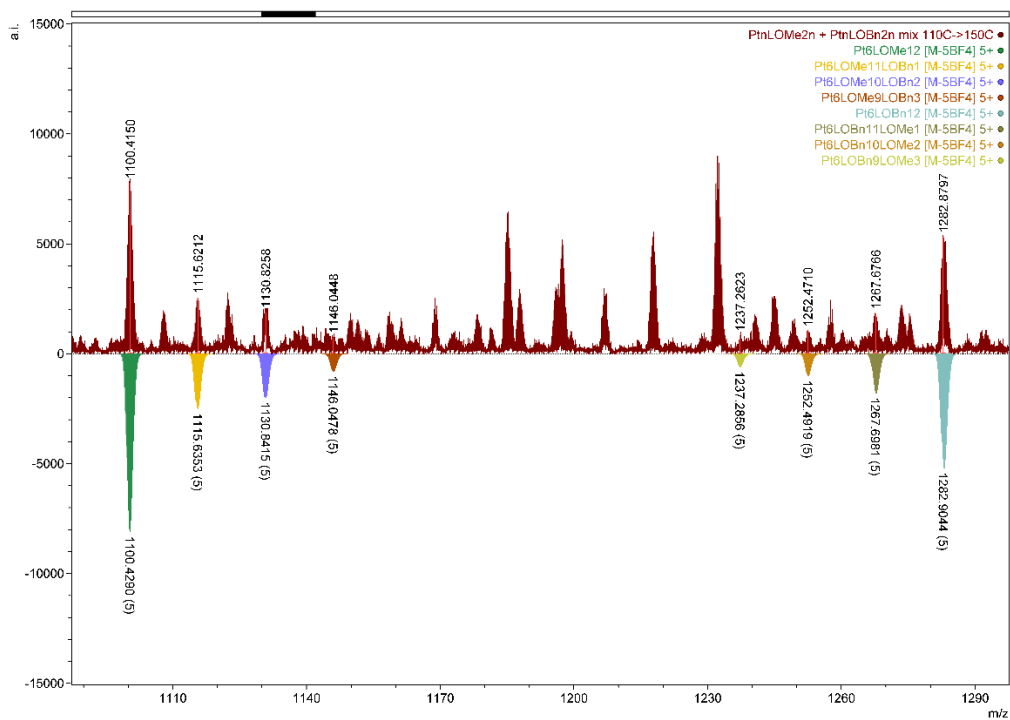

**Figure S96.** Distribution of the two ligands in  $M_6L_{12}$  assemblies ( $110^\circ\text{C}$  to  $150^\circ\text{C}$ ).

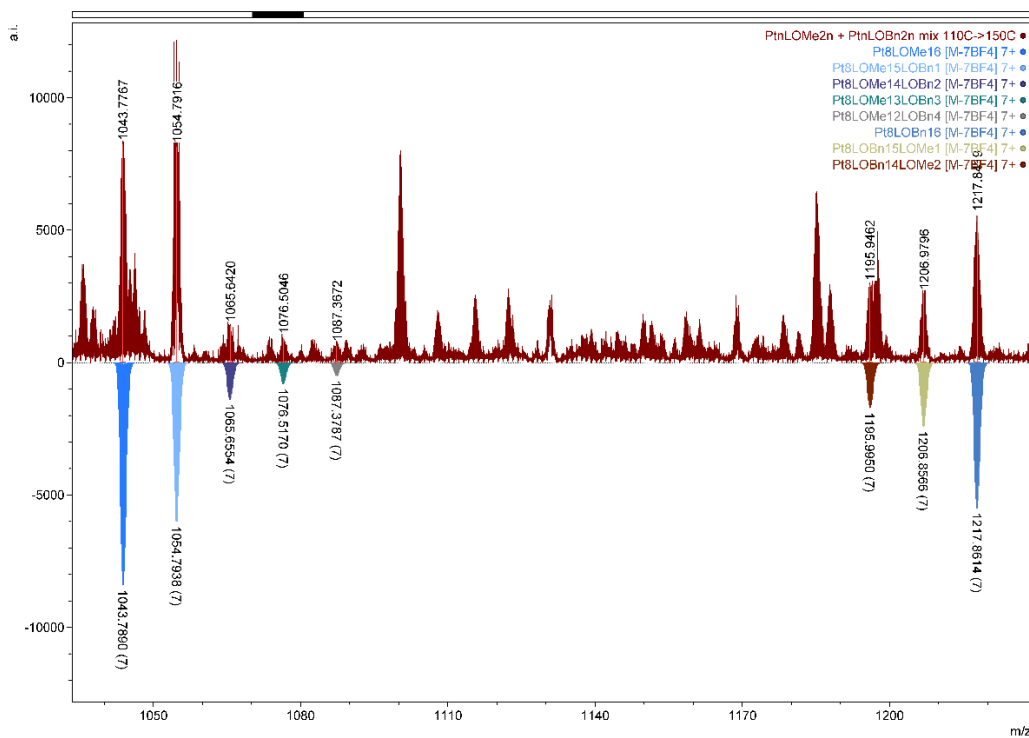

**Figure S97.** Distribution of the two ligands in  $M_8L_{16}$  assemblies ( $110^\circ\text{C}$  to  $150^\circ\text{C}$ ).

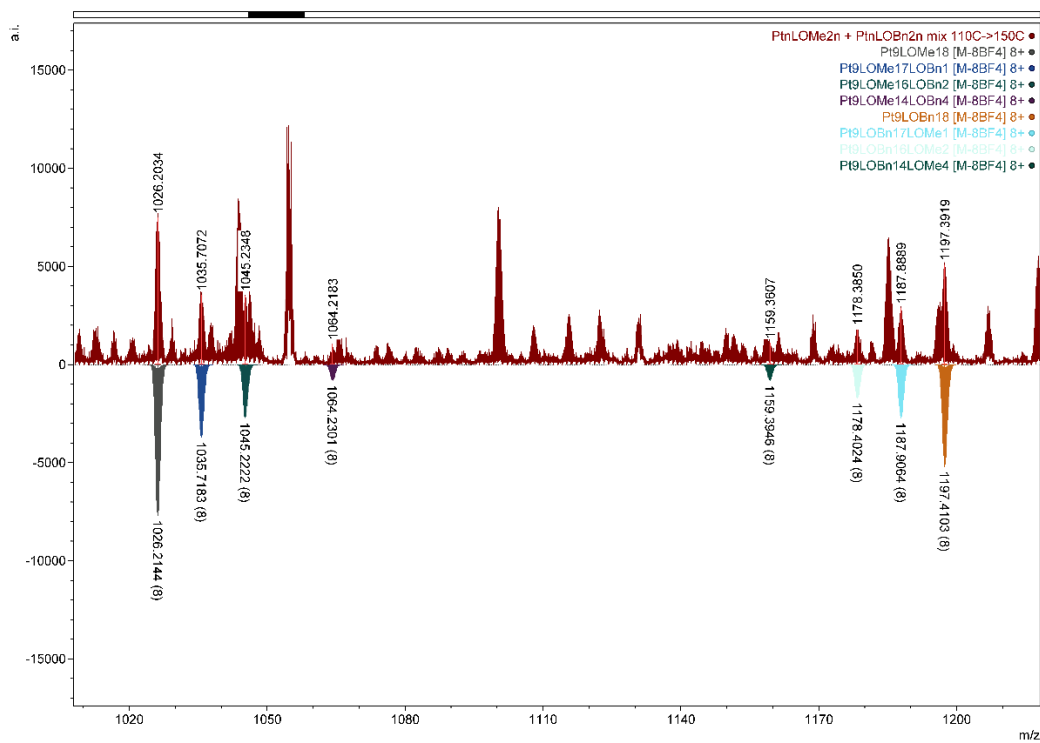

**Figure S98.** Distribution of the two ligands in  $M_9L_{18}$  assemblies (110°C to 150°C).

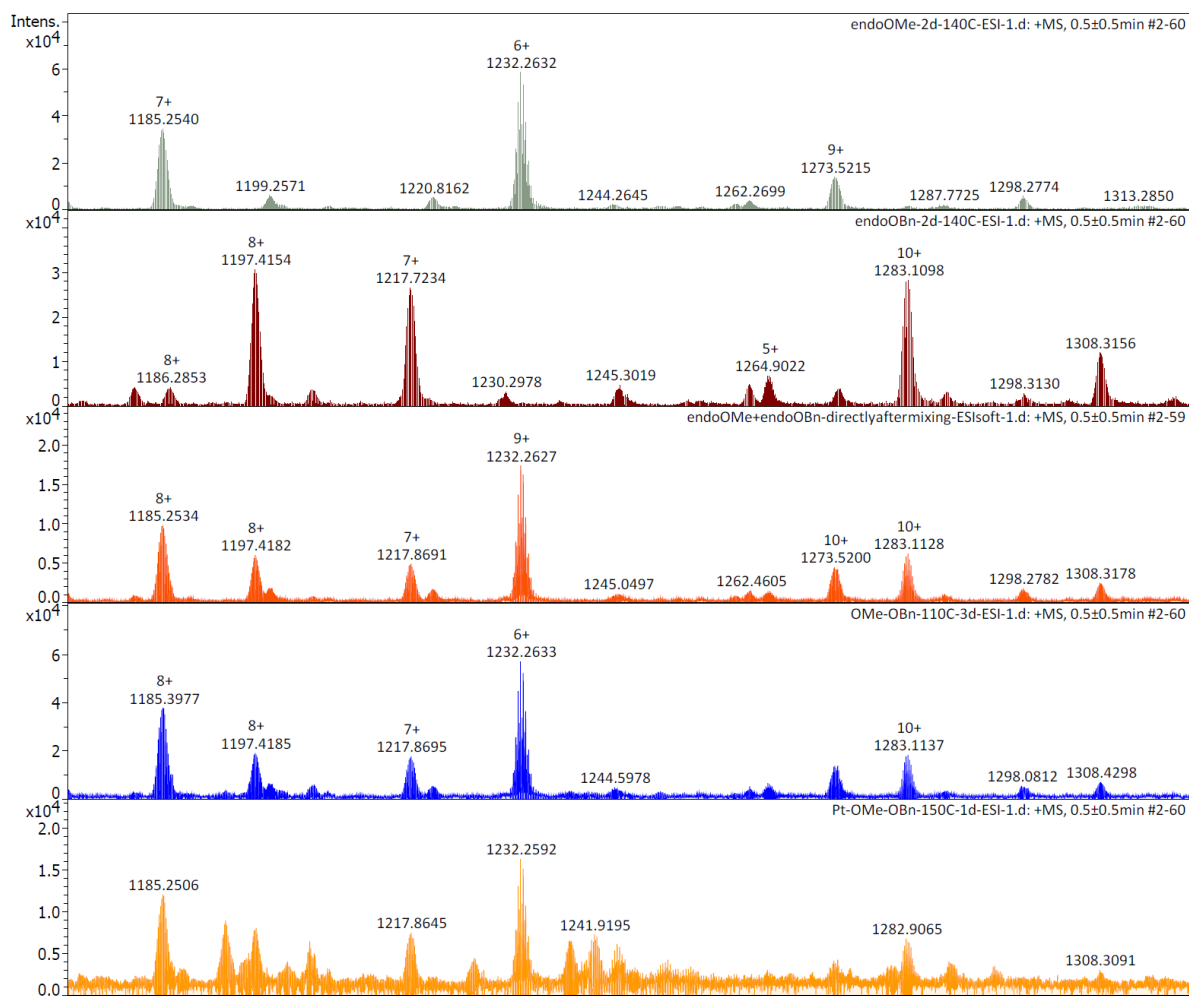

**Figure S99.** Example of collected MS spectra before and after heating two assemblies which were prepared at 110°C. The zoom in shows no change of the spectra after heating it at 110°C for 3d, only at 150°C the sample shows slow ligand exchange.

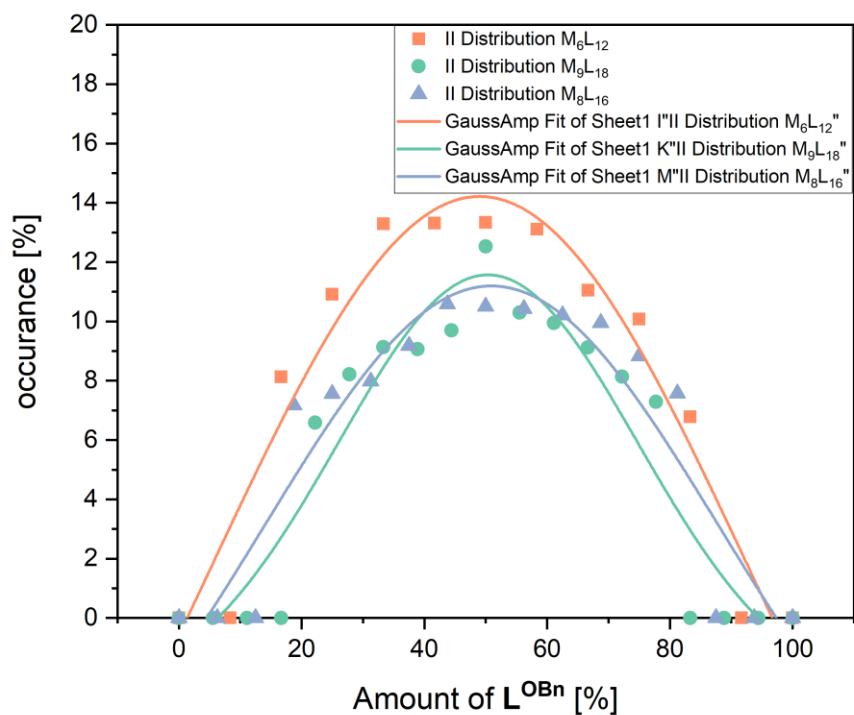

**Figure S100.** Ligand distribution after heating two assemblies which were prepared at 25°C to 150°C.

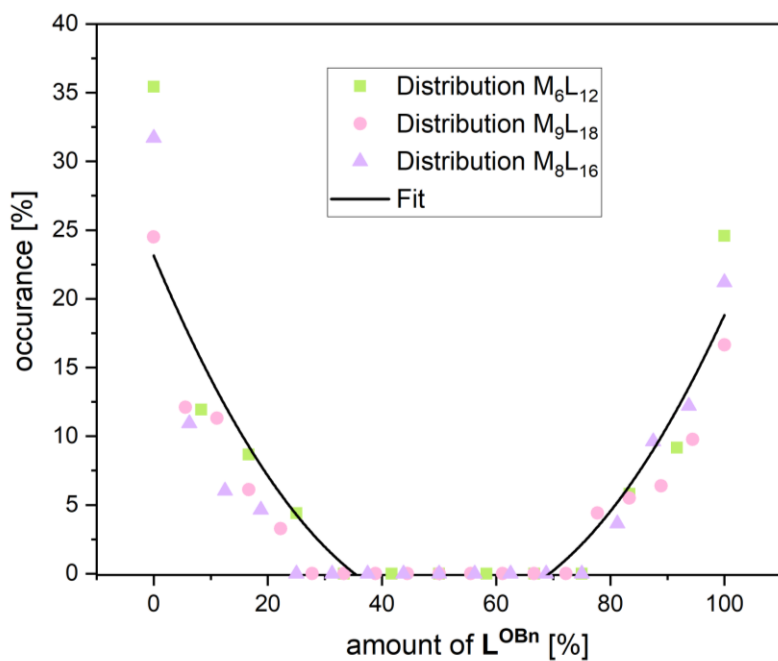

**Figure S101.** Ligand distribution after heating two assemblies which were prepared at 110°C to 150°C.



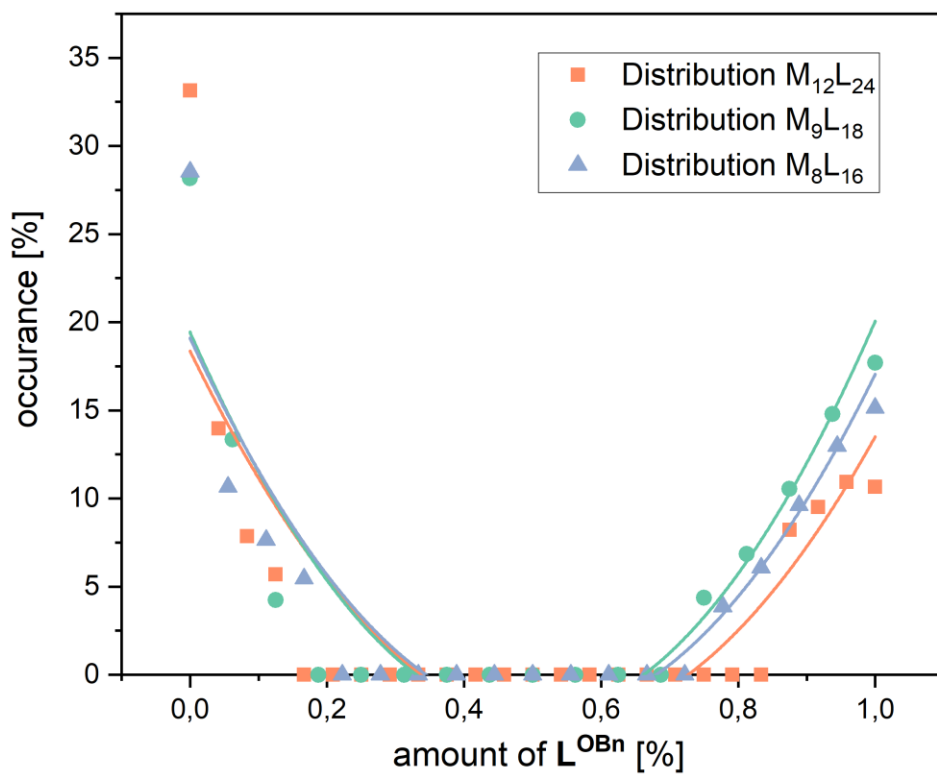

**Figure S102.** Ligand distribution after heating an assembly of  $L^{OMe}$  (prepared at 110°C) with polymeric material of  $L^{OBn}$  (prepared at 25°C) to 150°C.

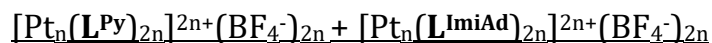

Samples containing a solution of  $\text{L}^{\text{Py}}$  (5.18 mg, 10  $\mu\text{mol}$ , 1 eq.) in 0.5 mL  $\text{MeCN-d}_3$  and  $[\text{Pt}(\text{BF}_4)_2(\text{MeCN})_4]$  (2.93 mg, 5.5  $\mu\text{mol}$ , 0.55 eq.) in 0.5 mL  $\text{MeCN-d}_3$  or  $\text{L}^{\text{ImiAd}}$  (6.40 mg, 10  $\mu\text{mol}$ , 1 eq.) in 0.5 mL  $\text{MeCN-d}_3$  and  $[\text{Pt}(\text{BF}_4)_2(\text{MeCN})_4]$  (2.93 mg, 5.5  $\mu\text{mol}$ , 0.55 eq.) in 0.5 mL  $\text{MeCN-d}_3$  were prepared. The solutions were then stirred at 110°C for 24h. The resulting solutions were mixed in a 1 to 1 ratio and heated to 150°C for 24h. After that the resulting solution was analyzed with MS.

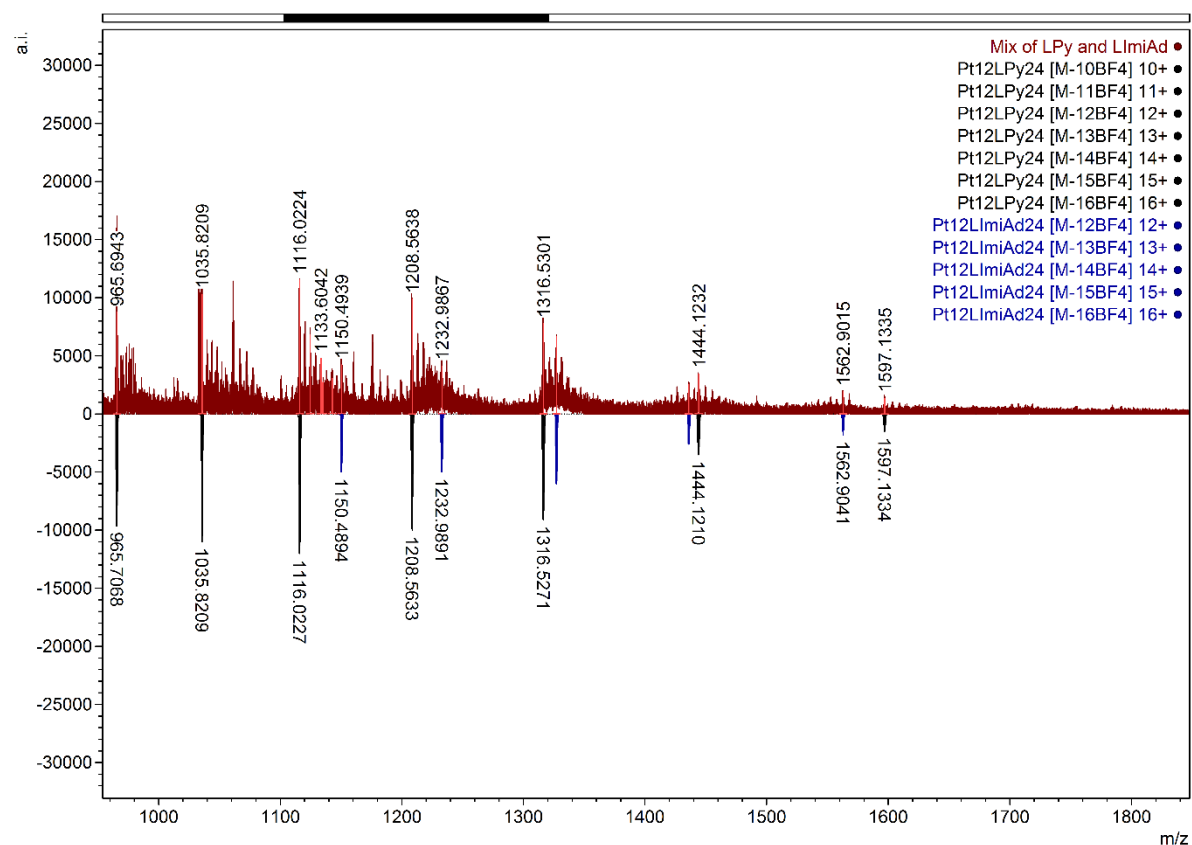

**Figure S103.** Full ESI-MS spectra of a mixture of  $[\text{Pt}_{12}(\text{L}^{\text{Py}})_{24}]^{48+}(\text{BF}_4^-)_{48}$  and  $[\text{Pt}_{12}(\text{L}^{\text{ImiAd}})_{24}]^{48+}(\text{BF}_4^-)_{48}$  prepared at 110°C for 1d. Both spheres were mixed in a 1 to 1 ratio and heated at 150°C for 24 h. Below the simulated spectra, above obtained spectra. Mostly homoleptic spheres are obtained as depicted in this MS spectra.

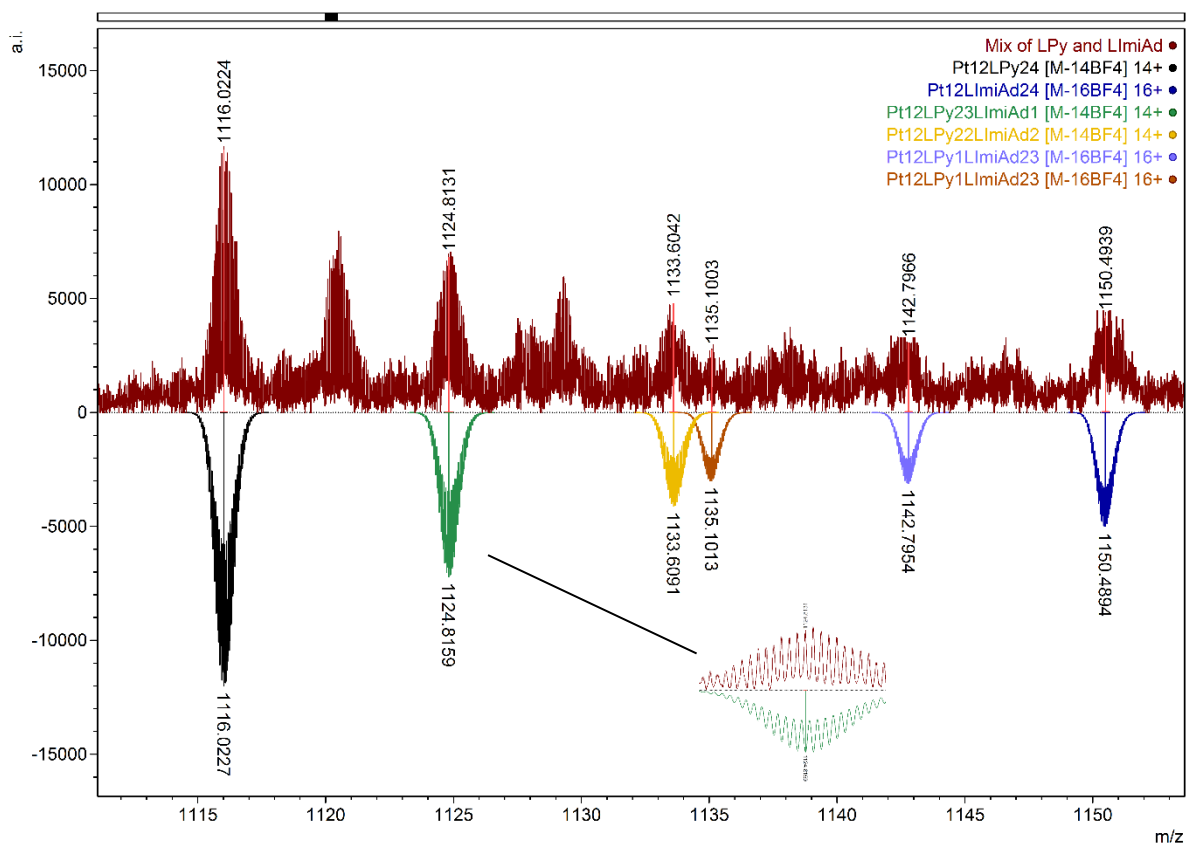

**Figure S104.** Zoom in into the 14+ species of  $\text{Pt}_{12}\text{L}^{\text{Py}}_{24}$  assembly showing the distribution of  $\text{L}^{\text{Py}}$  and  $\text{L}^{\text{ImiAd}}$  in the obtained  $\text{Pt}_{12}\text{L}_{24}$  assemblies.

## Application for other structures (SI5)

The required ligands were synthesized according to literature (for  $L^{\text{meta}}$  [6] and for  $L^{\text{para}}$  [7]).

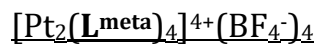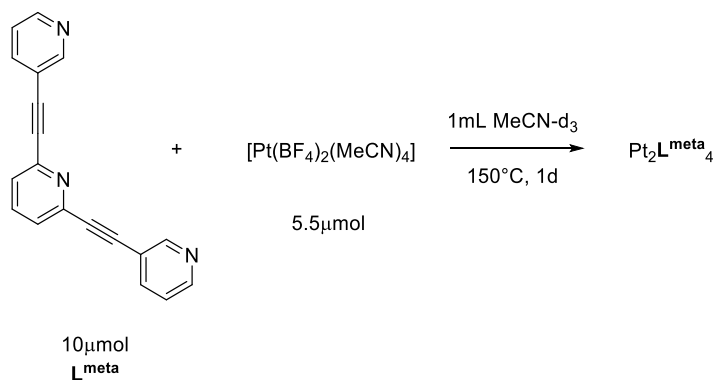

To a solution of  $L^{\text{meta}}$  (2.81 mg, 10  $\mu\text{mol}$ , 1 eq.) in 0.5 mL MeCN- $d_3$ ,  $[\text{Pt}(\text{BF}_4)_2(\text{MeCN})_4]$  (2.93 mg, 5.5  $\mu\text{mol}$ , 0.55 eq.) in 0.5 mL MeCN- $d_3$  was added. The solution was then stirred at 150  $^\circ\text{C}$  for 1 d in a high pressure tube.  $^1\text{H}$  NMR (300 MHz, Acetonitrile- $d_3$ )  $\delta$  9.30 (d,  $J$  = 1.8 Hz, 4H), 9.06 (dt,  $J$  = 5.7, 1.2 Hz, 4H), 8.18 (dt,  $J$  = 8.1, 1.6 Hz, 6H), 7.90 (dd,  $J$  = 8.4, 7.3 Hz, 2H), 7.75 – 7.69 (m, 6H), 7.69 – 7.64 (m, 4H).

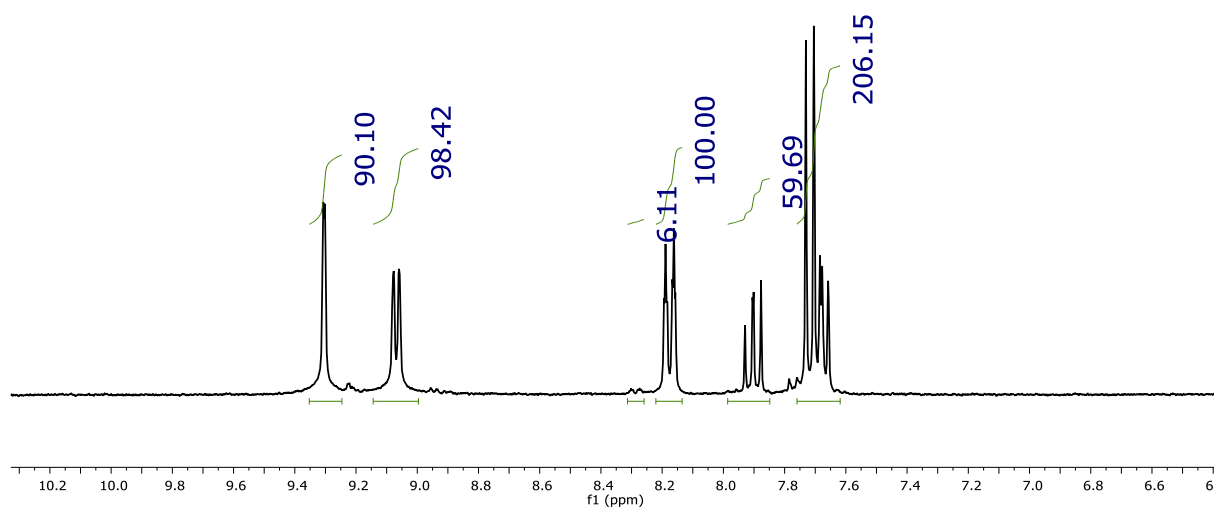

**Figure S105.**  $[\text{Pt}_2(\text{L}^{\text{meta}})_4]^{4+}(\text{BF}_4^-)_4$  sphere,  $^1\text{H}$  NMR in MeCN- $d_3$ .

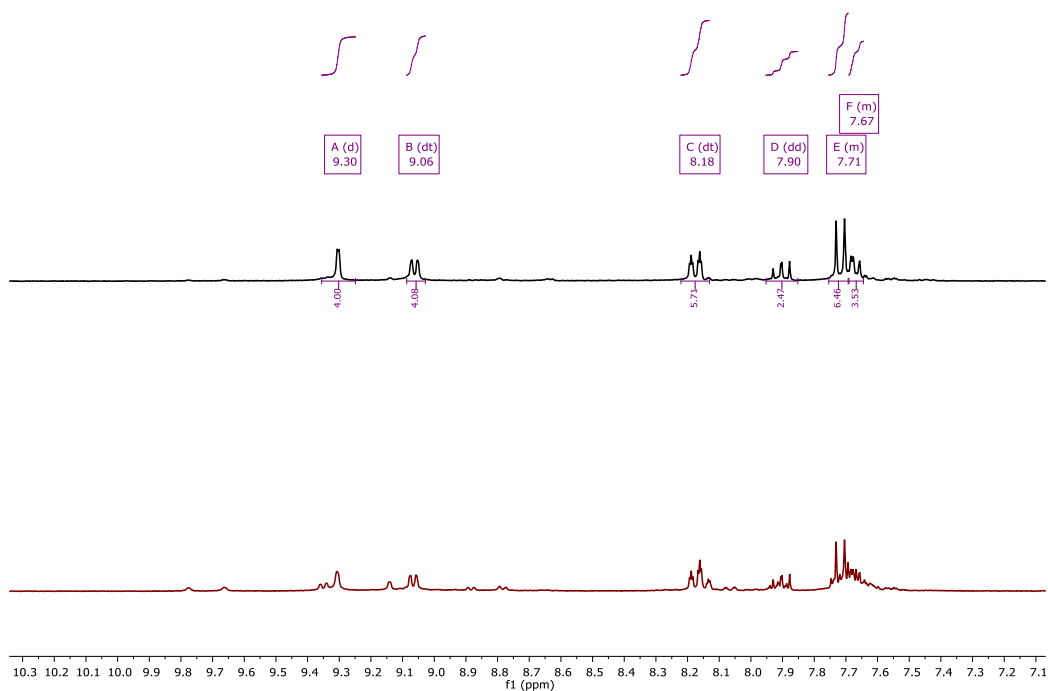

**Figure S106.**  $[\text{Pt}_2(\text{L}^{\text{meta}})_4]^{4+}(\text{BF}_4)_4$  sphere,  $^1\text{H}$  NMR in  $\text{MeCN-d}_3$ , comparison of a sample prepared at  $110^\circ\text{C}$  (bottom) and  $150^\circ\text{C}$  (top).

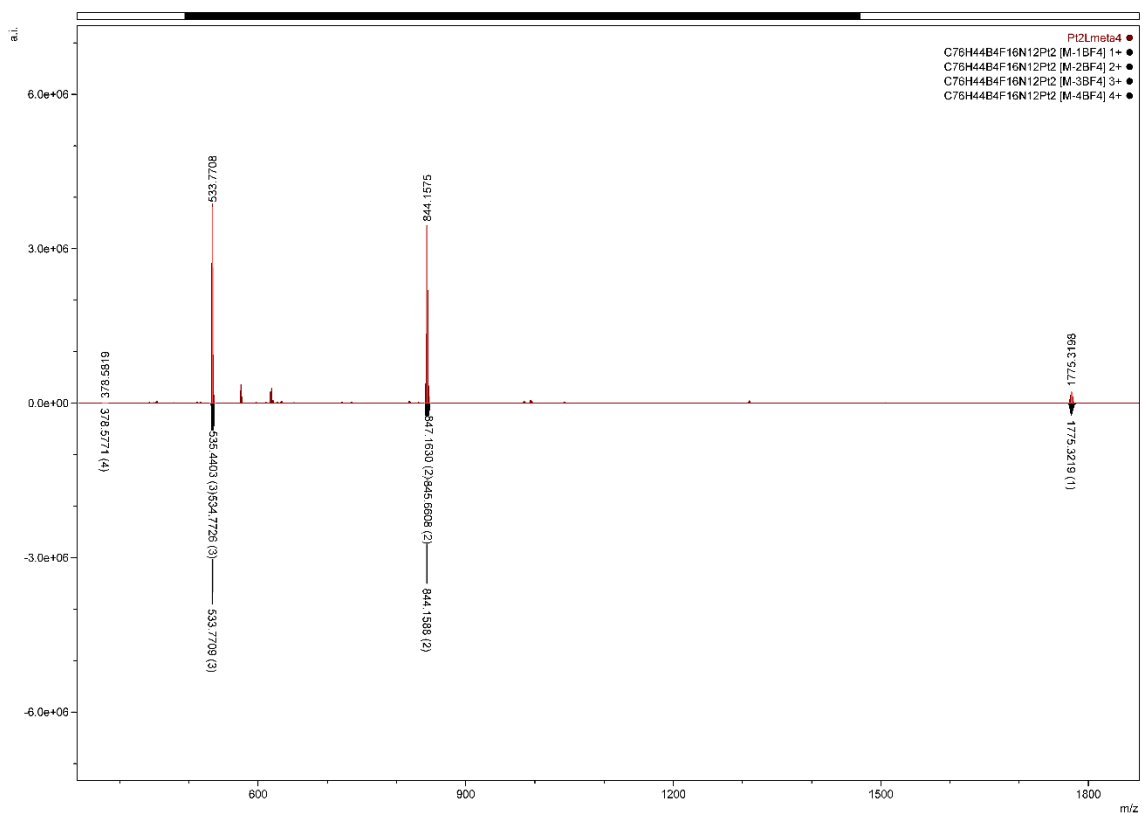

**Figure S107.** Full ESI-MS spectra of  $[\text{Pt}_2(\text{L}^{\text{meta}})_4]^{4+}(\text{BF}_4)_4$  prepared at  $150^\circ\text{C}$  for 1d. Below the simulated spectra, above obtained spectra.

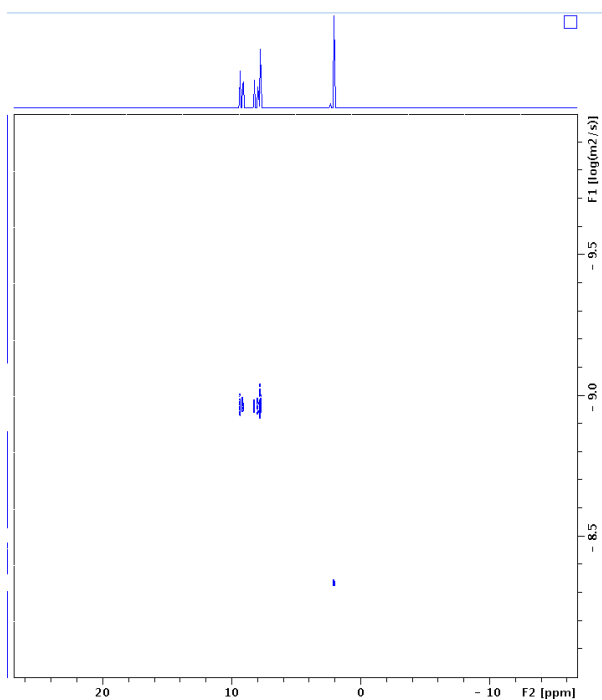

**Figure S108.** Full DOSY NMR spectra of  $[\text{Pt}_2(\text{L}^{\text{meta}})_4]^{4+}(\text{BF}_4^-)_4$  prepared at  $150^\circ\text{C}$  for 1d.

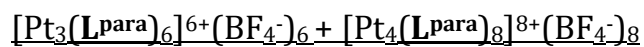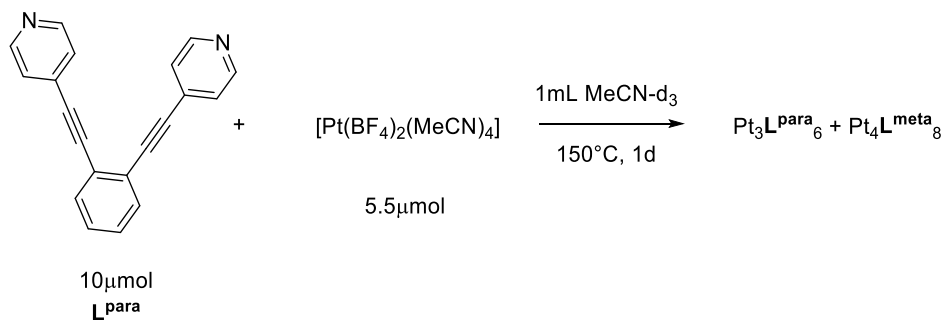

To a solution of  $\text{L}^{\text{para}}$  (2.80 mg, 10  $\mu\text{mol}$ , 1 eq.) in 0.5 mL  $\text{MeCN-d}_3$ ,  $[\text{Pt}(\text{BF}_4)_2(\text{MeCN})_4]$  (2.93 mg, 5.5  $\mu\text{mol}$ , 0.55 eq.) in 0.5 mL  $\text{MeCN-d}_3$  was added. The solution was then stirred at  $150^\circ\text{C}$  for 1d in a high pressure tube.  $^1\text{H}$  NMR (300 MHz, Acetonitrile- $d_3$ )  $\delta$  8.97 (d,  $J = 6.7$  Hz, 6H), 8.86 (d,  $J = 6.3$  Hz, 24H), 7.77 – 7.66 (m, 48H), 7.66 – 7.54 (m, 22H).

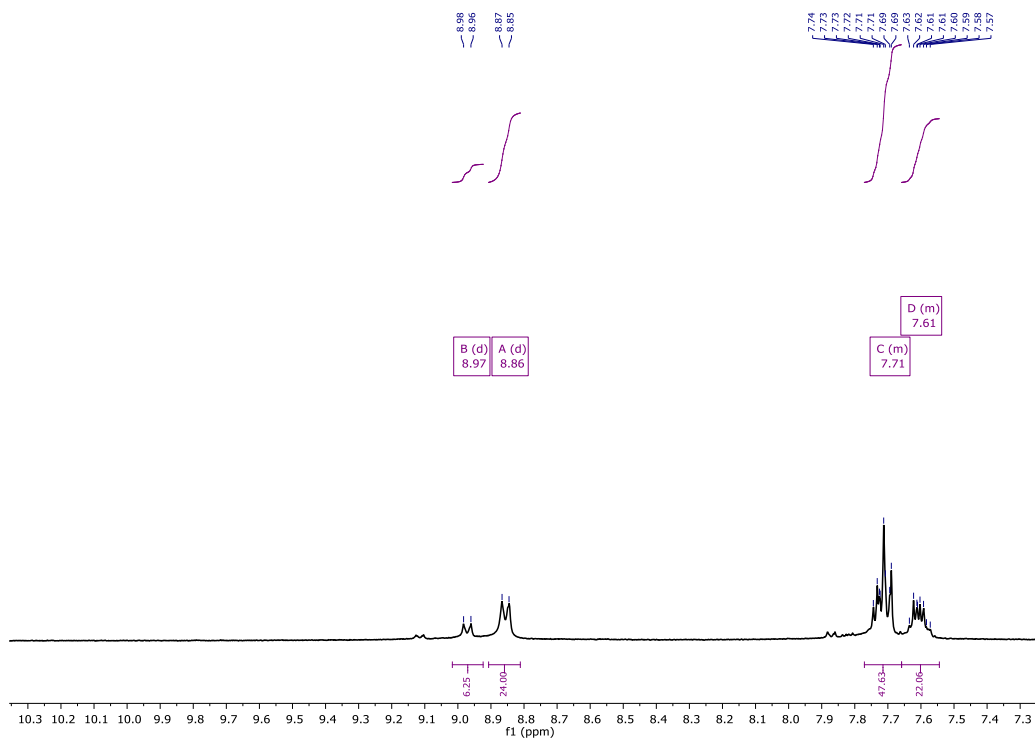

**Figure S109.** Mixture of  $[\text{Pt}_3(\text{L}^{\text{para}})_6]^{6+}(\text{BF}_4^-)_6$  and  $[\text{Pt}_4(\text{L}^{\text{para}})_8]^{8+}(\text{BF}_4^-)_8$ ,  $^1\text{H}$  NMR in  $\text{MeCN-d}_3$ .

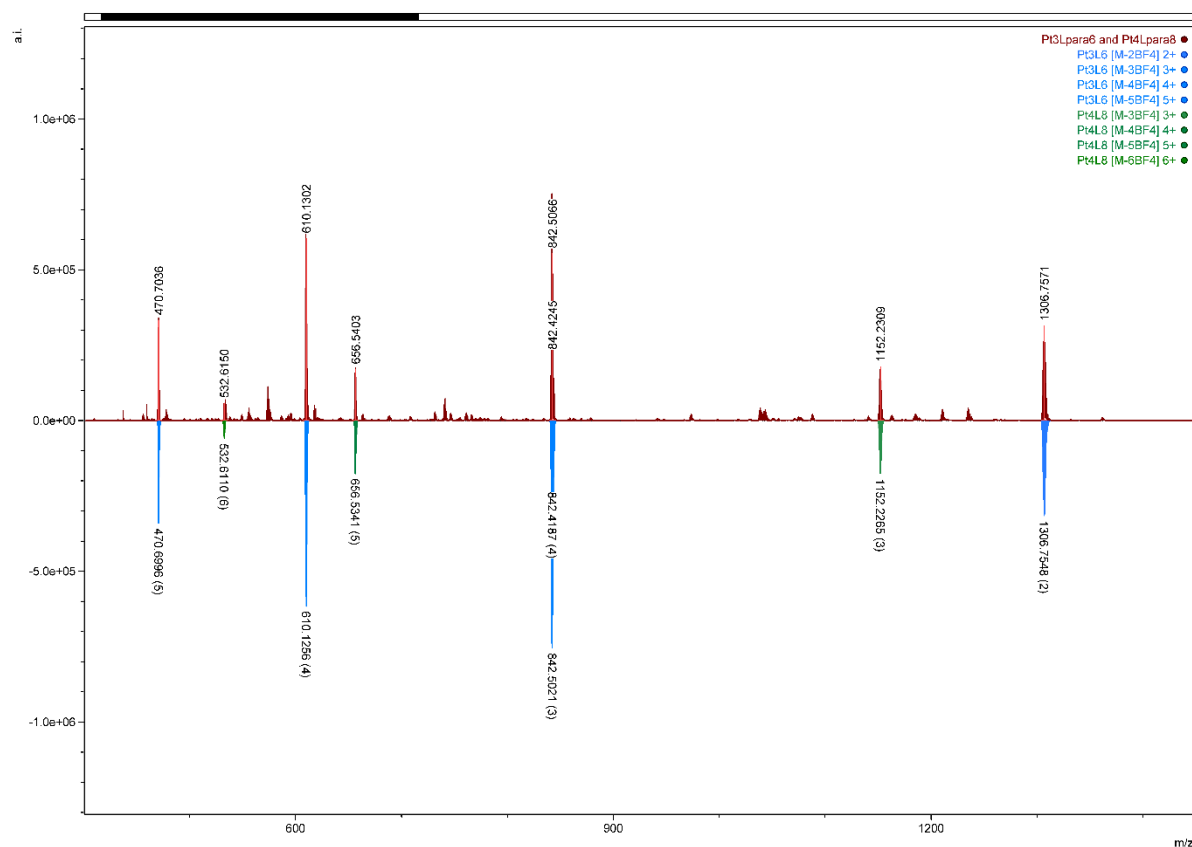

**Figure S110.** Full ESI-MS spectra of the mix of  $[\text{Pt}_3(\text{L}^{\text{para}})_6]^{6+}(\text{BF}_4^-)_6$  and  $[\text{Pt}_4(\text{L}^{\text{para}})_8]^{8+}(\text{BF}_4^-)_8$  prepared at  $150^\circ\text{C}$  for 1d. Below the simulated spectra, above obtained spectra.

## Possible formation pathways (SI6)

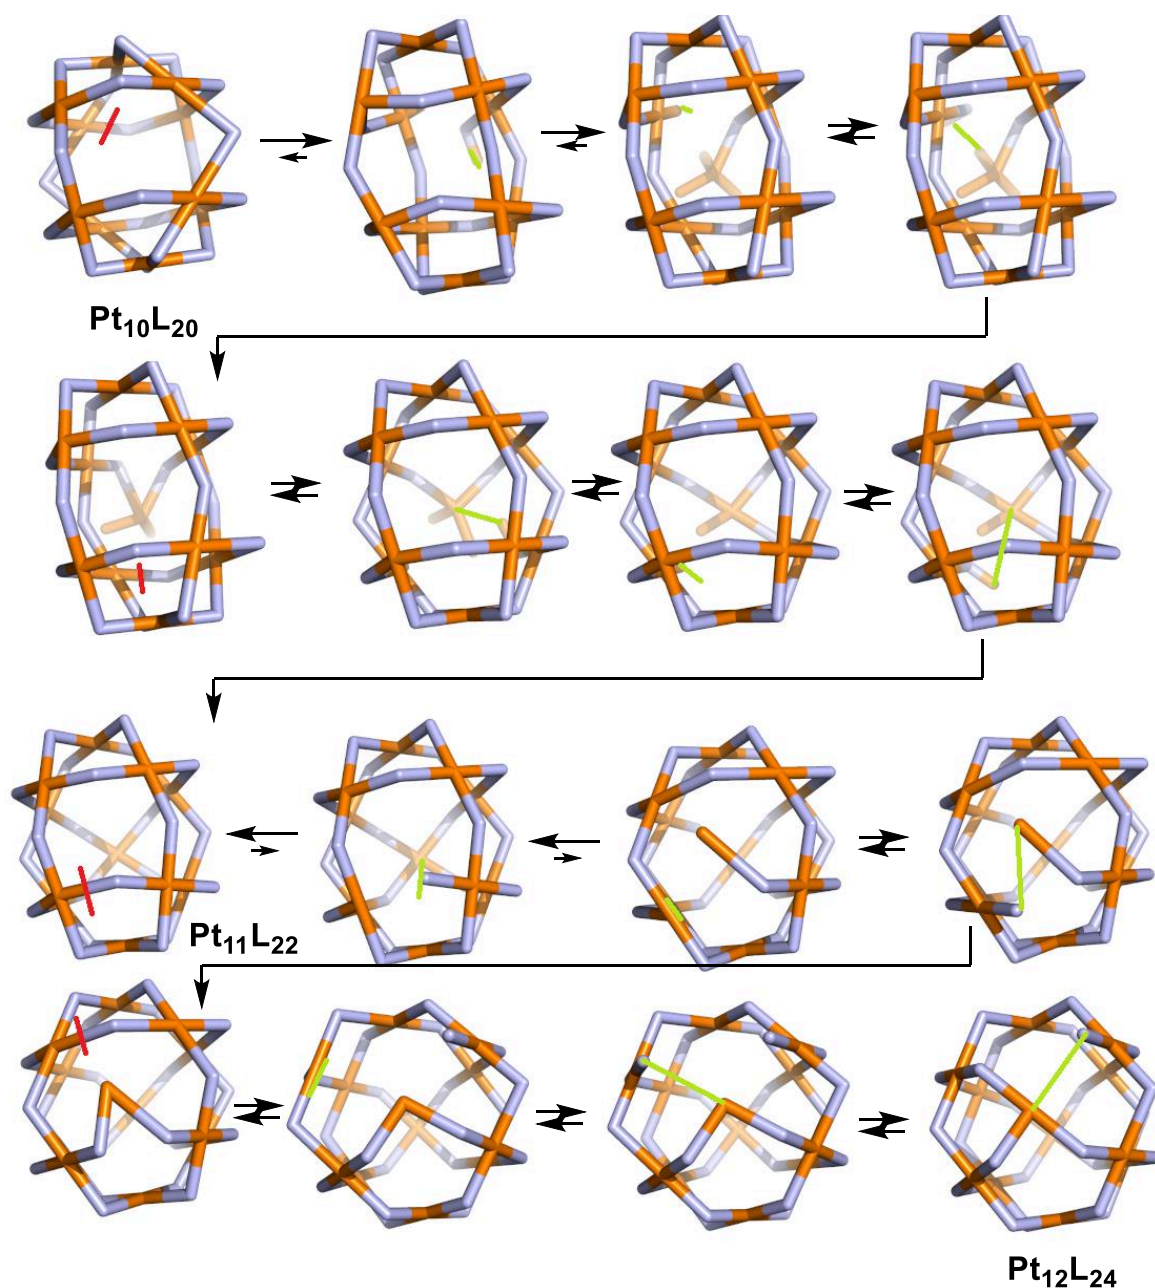

**Figure S111.** Possible pathway transforming the Pt<sub>10</sub>L<sub>20</sub> to the Pt<sub>12</sub>L<sub>24</sub> over Pt<sub>11</sub>L<sub>22</sub> (Pt=orange, ligand=light blue, red bars indicate where bonds are broken, green bars indicate where bonds are made). This graphic shows only one possible pathway. In this pathway only one bond is broken in the first step, multiple other pathways can be envisioned.



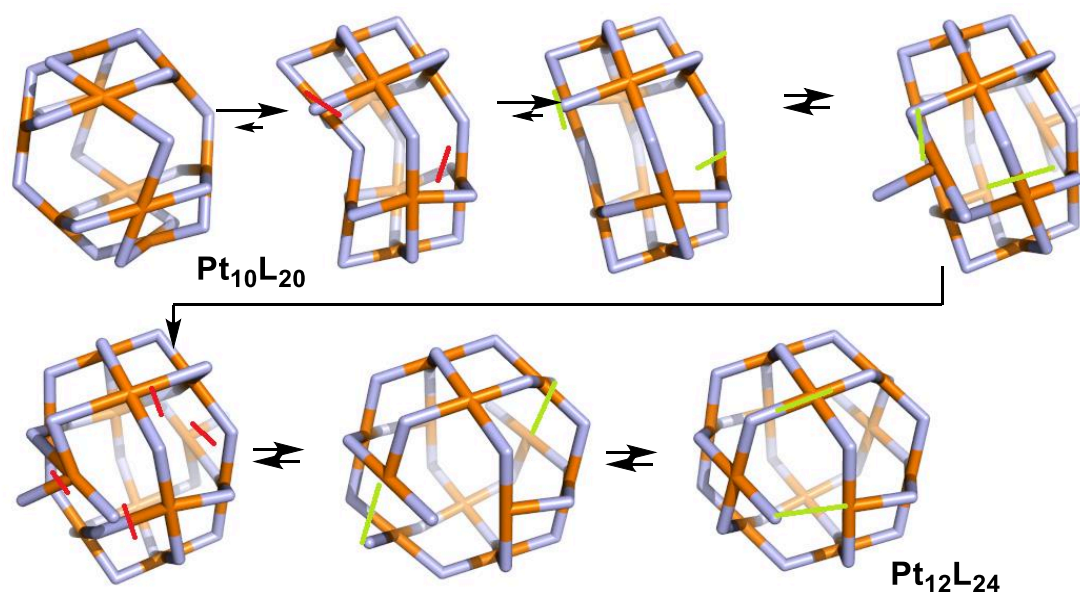

**Figure S112.** Possible pathway transforming the  $\text{Pt}_{10}\text{L}_{20}$  to the  $\text{Pt}_{12}\text{L}_{24}$  without any other intermediate sphere assembly (Pt=orange, ligand=light blue, red bars indicate where bonds are broken, green bars indicate where bonds are made). This graphic shows only one possible pathway. In this pathway only two bonds have to be broken in the first step, multiple other pathways can be envisioned.

## Computational Methods and calculated relative energies for different type of assemblies (SI7)

The relative energies of coordination cage topologies were computed using an extension of previously reported classical-mechanics dynamics model.<sup>[8]</sup> Amber forcefield parameters were developed for platinum-pyridyl coordination and sp<sup>1</sup> carbon bonds by a genetic fitting of DFT single point energies, via *paramfit*,<sup>[9]</sup> computed at the rB3LYP/def2TZV level of theory, via *Gaussian 16*.<sup>[10]</sup> Platinum non-bonded interactions were based on previously reported values for divalent platinum ions.<sup>[11]</sup>

Structures were assembled for coordination cages containing 6–12 metal centers, either palladium or platinum, based on templates using *profit*.<sup>[12]</sup> These initial structures were optimized with the parameterized forcefield using the single-threaded *sander* program included in the AmberTools16 suite.<sup>[13]</sup> A molecular dynamics trajectory was then propagated for 5 ns of equilibration and 20 ns of productive molecular dynamics using the GPU-enabled *pmemd.cuda*.<sup>[14]</sup> Both minimization and molecular dynamics trajectory simulations were carried out with a generalized-Born model implicit solvation adjusted for the dielectric constant of acetonitrile (ca. 36 F m<sup>-1</sup>) as shown below in the provided input files, Table S21. The average potential energy of each model, divided by the number of metal centers, was then used to compute the relative free energy for possible  $\text{M}_n\text{L}_{2n}$  topologies formed from either Pd or Pt metal centers. The relative energy for each cage

size was then computed from the Boltzmann weighted contributions of all topological configurations containing the same number of metal centers, e.g. the triangular bicopula or cuboctaheron forms of  $M_{12}L_{24}$  cages.

| <b>Table S21:</b> Amber input files for single-threaded CPU minimization and minimization. |                                       |
|--------------------------------------------------------------------------------------------|---------------------------------------|
| Minimization                                                                               | Molecular dynamics                    |
| &cntrl                                                                                     | &cntrl                                |
| imin = 1,                                                                                  | imin = 0,                             |
| ntb = 0,                                                                                   | ntb = 0,                              |
| igb = 7,                                                                                   | irest = 1, ntx = 7,                   |
| saltcon = 0.1,                                                                             | igb = 7, saltcon = 0.1, extdiel = 36, |
| extdiel = 36,                                                                              | cut = 9999,                           |
| maxcyc = 4000,                                                                             | ntt = 3, gamma_ln=1.0,                |
| ioutfm = 1,                                                                                | tempi = 0.0, temp0 = 300.0,           |
| ncyc = 500,                                                                                | nstlim = 5000000, dt = 0.001,         |
| cut = 12,                                                                                  | ioutfm = 1,                           |
| ntwr = 10,                                                                                 | ntpr = 1000, ntwx = 1000, ntwr        |
| ntpr = 10,                                                                                 | =1000                                 |
| /                                                                                          | /                                     |

**Table S22.** Summary of relative energies for different type of  $Pt_nL_{2n}$  assemblies in kcal/mol.

| Size n | $L^{OMe}$ ; M=Pd | $L^{OMe}$ ; M=Pt | $L=L^{Py}$ ; M=Pt | $L=L^{P0}$ ; M=Pt |
|--------|------------------|------------------|-------------------|-------------------|
| 6      | 3.39             | 4.06             | 0.61              | 1.08              |
| 8      | 1.45             | 2.64             | 1.12              | 0.12              |
| 9      | 1.25             | 1.71             | 1.42              | 0.14              |
| 10     | 1.93             | 2.41             | 1.42              | 1.21              |
| 11     | 1.67             | 1.70             | 1.64              | 2.62              |
| 12     | 0.15             | 0.23             | 0.38              | 0                 |

### MS calibration of $L^{OMe}$ and $L^{Py}$ and MSMS analysis (SI8)

The calibration of the response of different sized assemblies with  $L^{OMe}$  was performed by dilution of a sample of  $Pt_nL^{OMe}_{2n}$  with  $Pd_{12}L^{OMe}_{24}$ . The intensity of the unique signals corresponding to different types of assemblies *versus* the relative concentration shows a linear response (when the settings on the MS machine are kept the same, same solvent system is used and ion strength of the solution is kept the same). Thus, spherical self-assemblies show a linear correlation between intensity and concentration similar like organic molecules. The same procedure was also applied for  $L^{Py}$ .

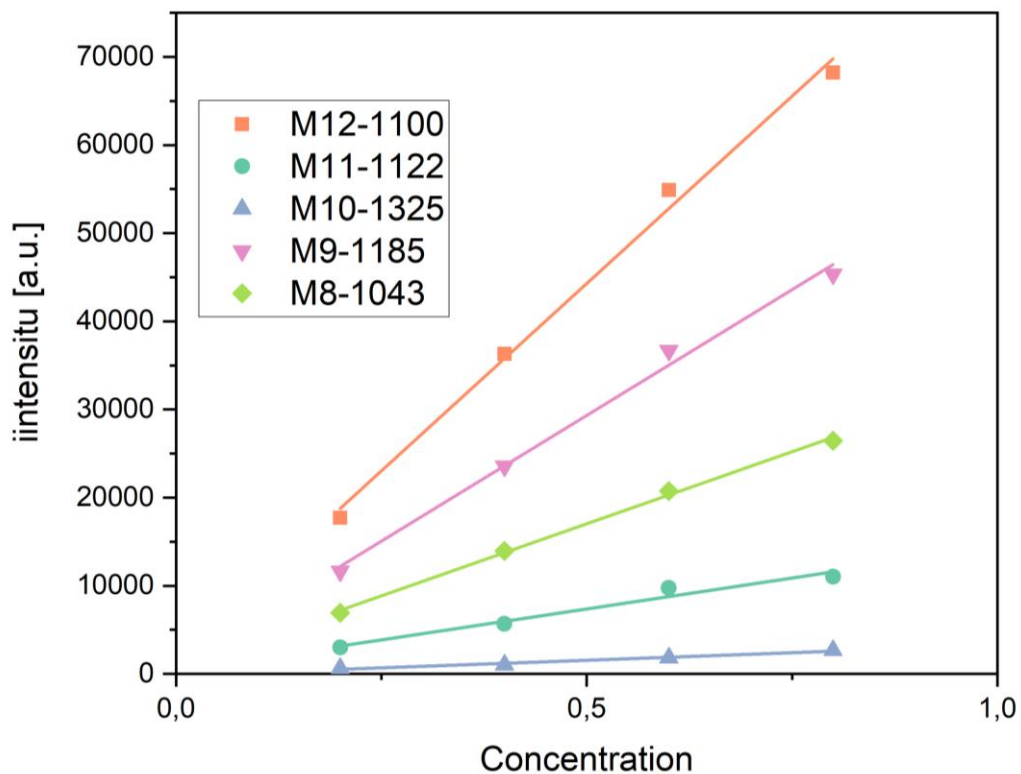

| Equation        | $y = a + b \cdot x$ |                   |                 |                    |                   |
|-----------------|---------------------|-------------------|-----------------|--------------------|-------------------|
| Plot            | M12-1100            | M11-1122          | M10-1325        | M9-1185            | M8-1043           |
| Weight          | No Weighting        |                   |                 |                    |                   |
| Intercept       | $1766,5 \pm 2494,$  | $354 \pm 1015,74$ | $-166 \pm 212,$ | $782,5 \pm 1787,0$ | $677,5 \pm 579,6$ |
| Slope           | $85015,5 \pm 455$   | $14029,5 \pm 185$ | $3433 \pm 387,$ | $57063,5 \pm 326$  | $32697 \pm 1058$  |
| Residual Sum of | 8299468,7           | 1375652,7         | 60033,2         | 4257914,3          | 448060,2          |
| Pearson's r     | 0,99714             | 0,98297           | 0,9875          | 0,99675            | 0,99895           |
| R-Square (COD)  | 0,99429             | 0,96623           | 0,97516         | 0,9935             | 0,99791           |
| Adj. R-Square   | 0,99144             | 0,94935           | 0,96275         | 0,99026            | 0,99686           |

**Figure S113.** Plot of the intensity of different size assemblies with the general structure  $Pt_nL^{OMe}_{2n}$  versus their relative concentration. Pure assemblies could not be obtained, the calibration was performed on a sample prepared at 150°C for 3d.

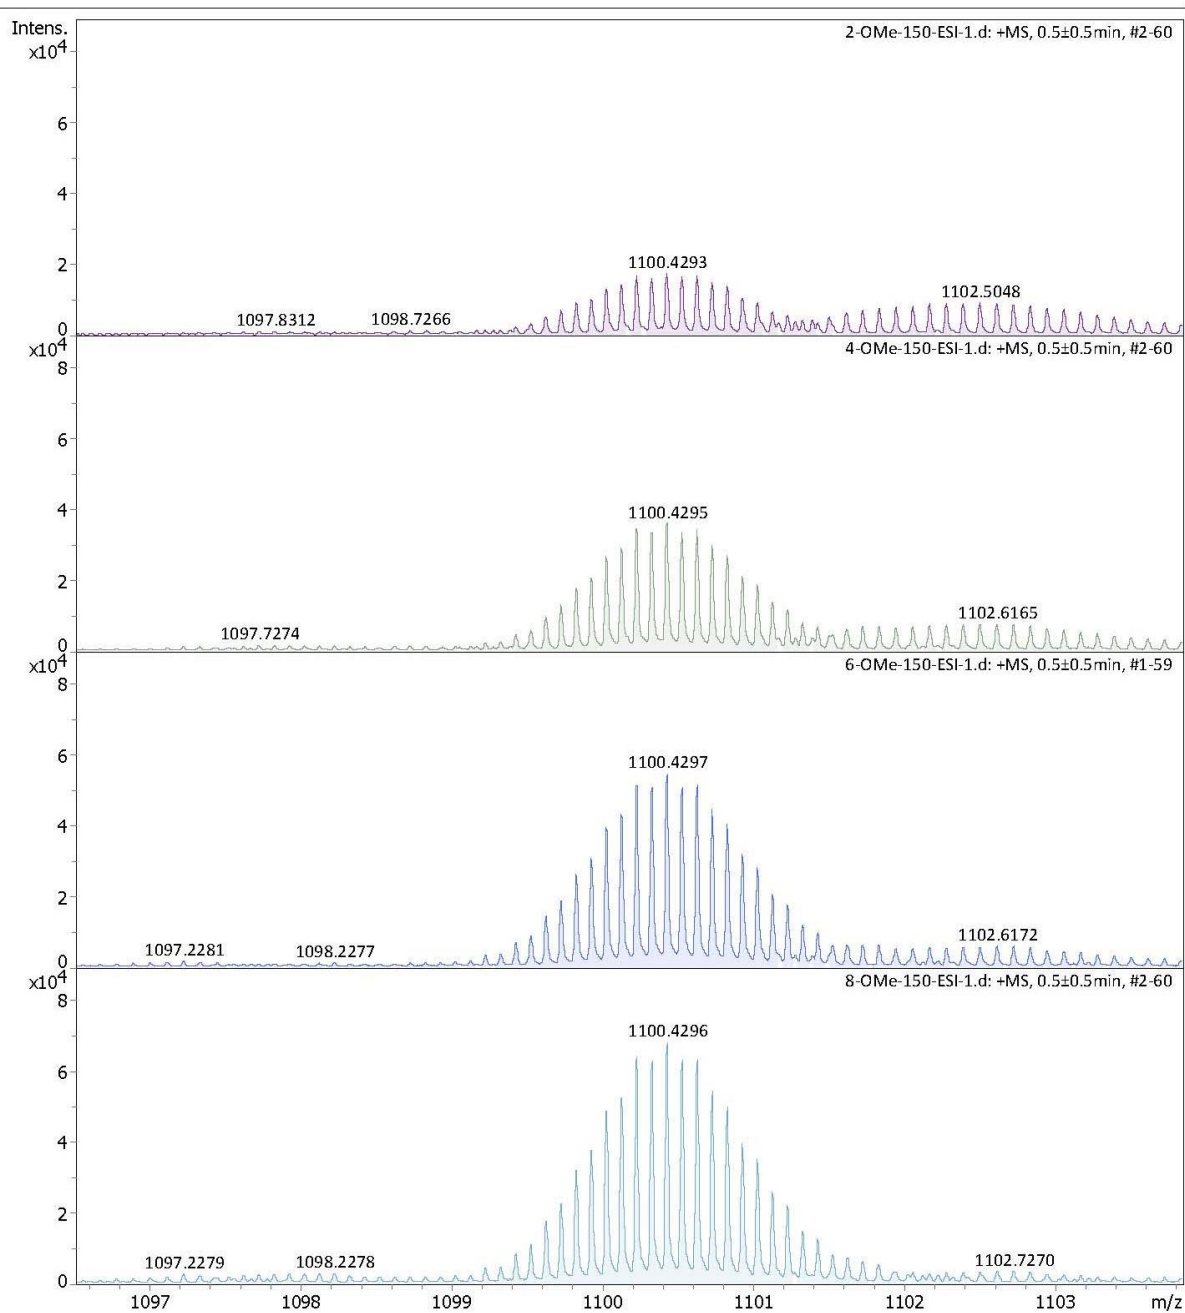

**Figure S114.** Example of the 10<sup>+</sup> species of  $\text{Pt}_{12}\text{L}^{\text{OMe}}_{24}$ , the intensity decreases linearly upon dilution (from bottom to top, 1.25, 1.66, 2.5 and 5 times diluted).

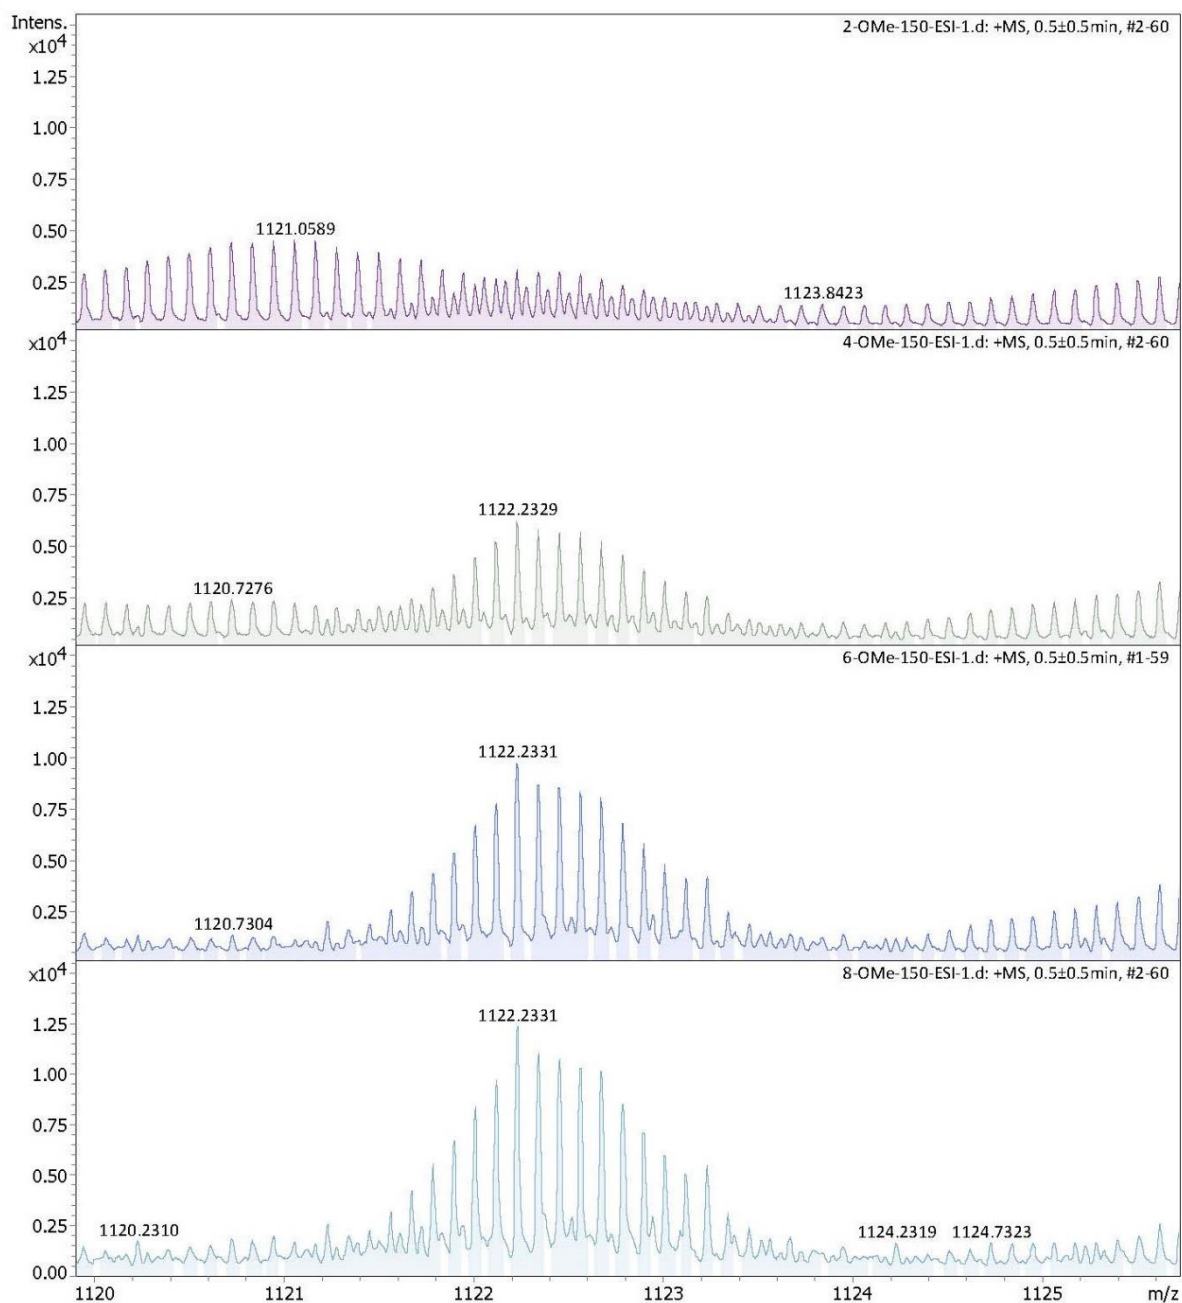

**Figure S115.** Example of the  $8^+$  species of  $Pt_9LOMe_{18}$ , the intensity decreases linearly upon dilution (from bottom to top, 1.25, 1.66, 2.5 and 5 times diluted).

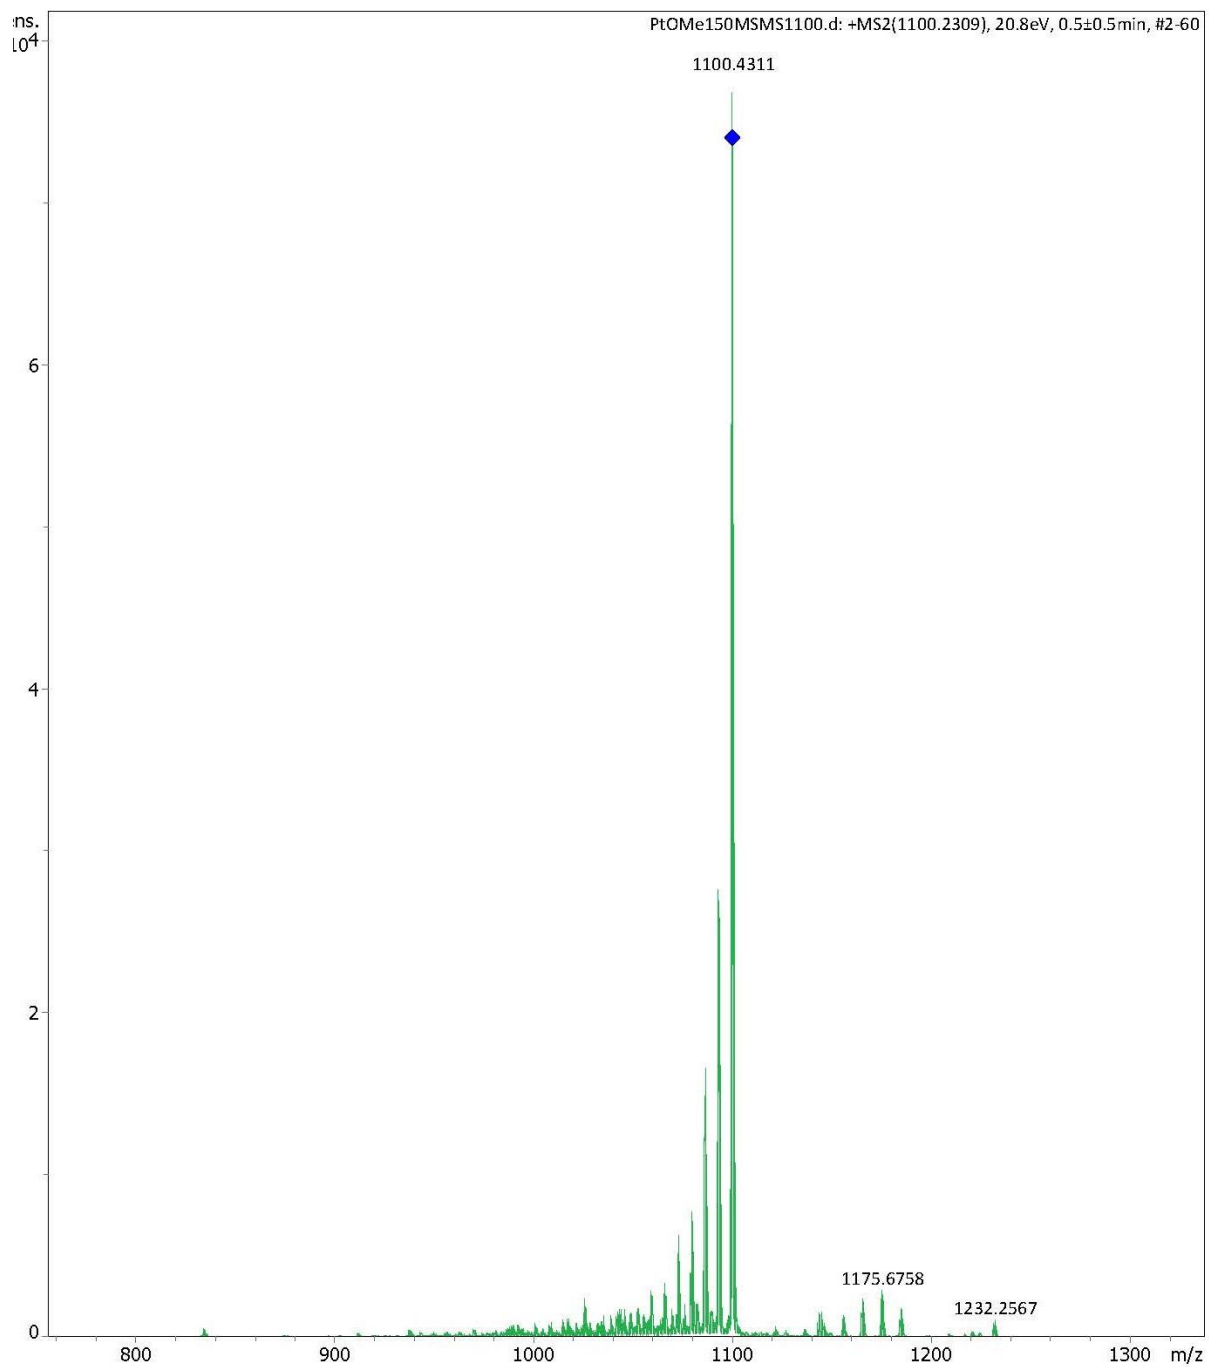

**Figure S116.** MSMS performed on the 10+ species of  $\text{Pt}_{12}\text{L}^{24}\text{OMe}_{24}$  under high energy input (until 50% of initial signal remain) showing no appearance of other sized assemblies due to MS ionization (measuring conditions 3eV, MSMS 20.8 eV).

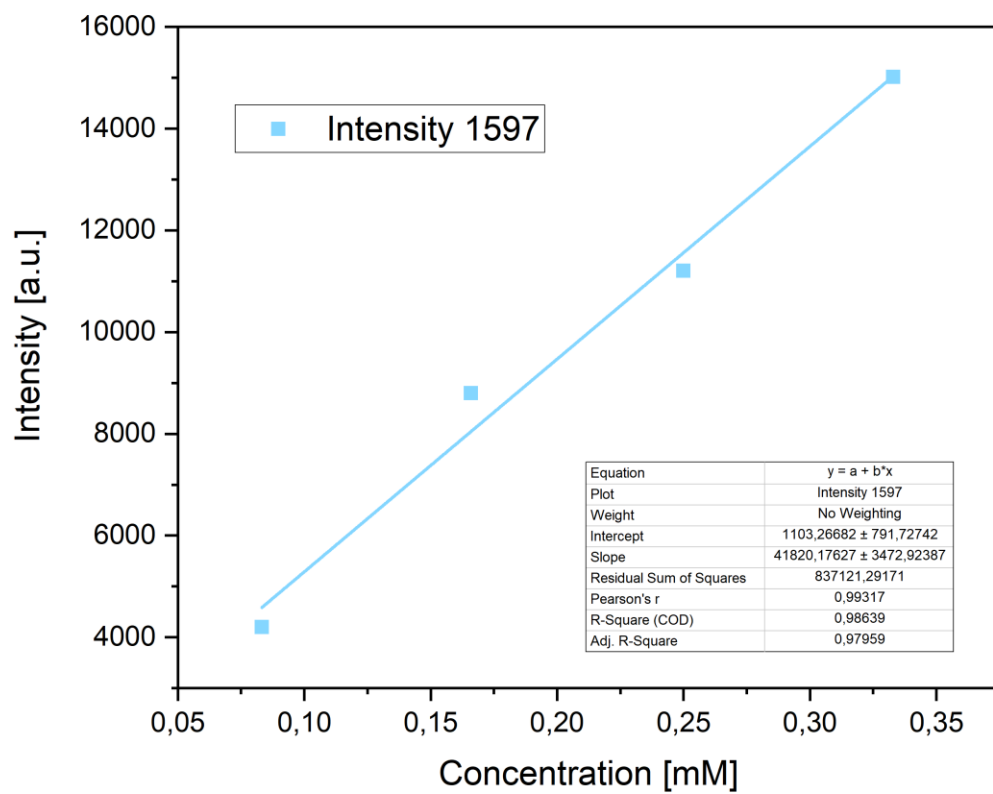

**Figure S117.** Plot of the intensity of  $\text{Pt}_{12}\text{L}^{\text{Py}}_{24}$  versus its concentration.

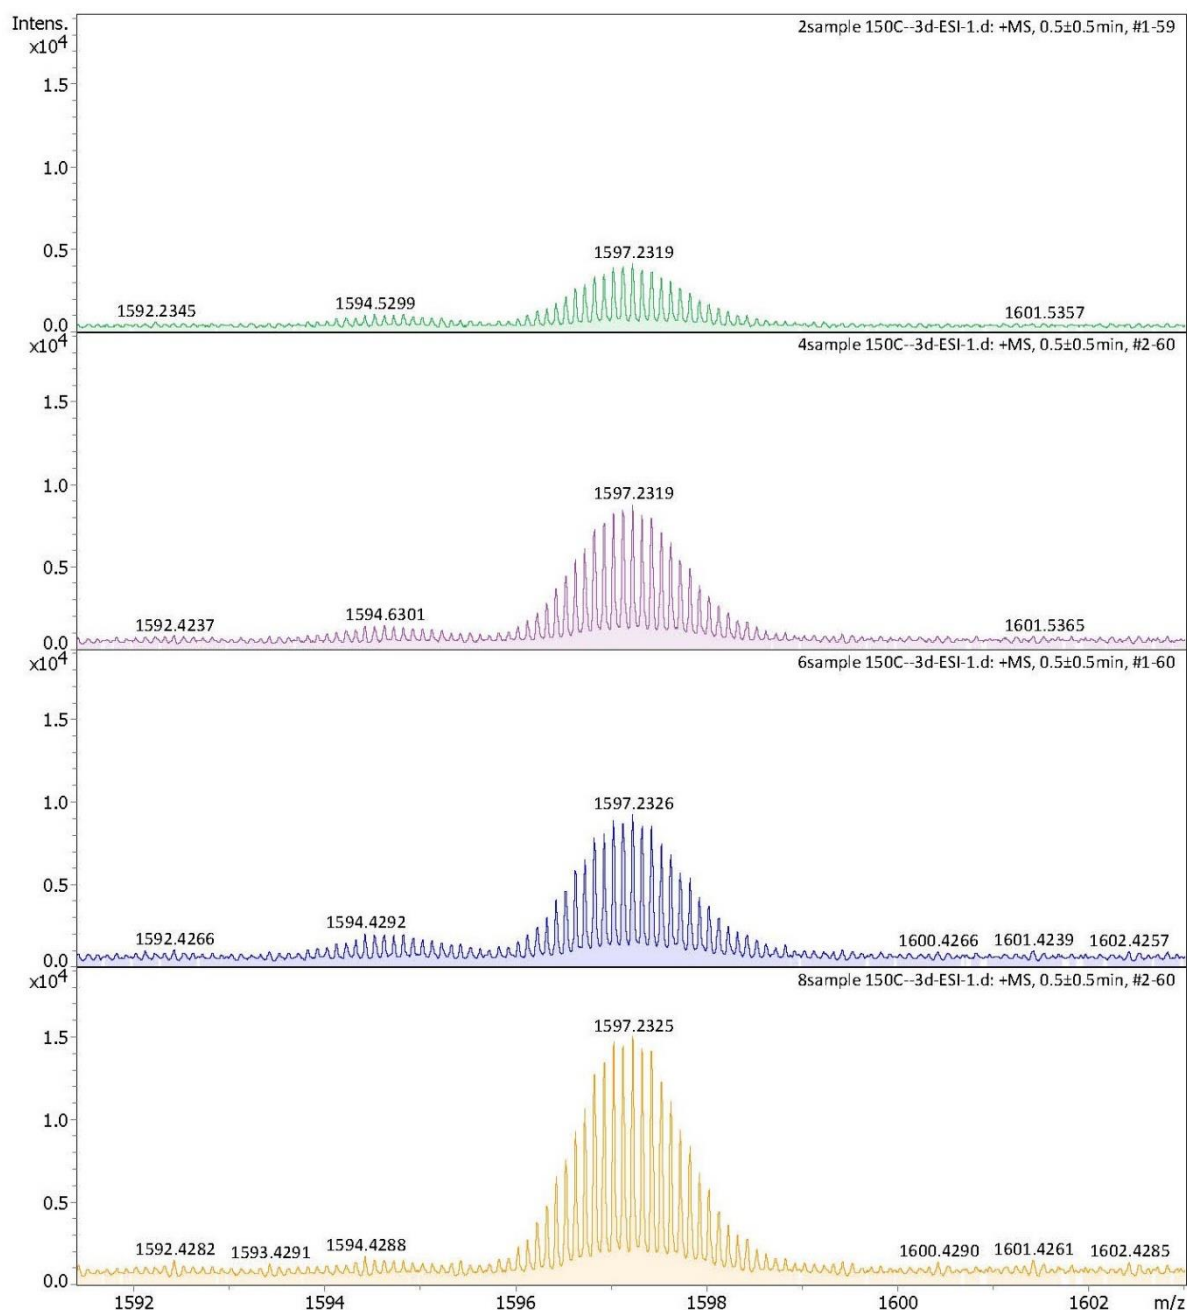

**Figure S118.** Example of the  $10^+$  species of  $Pt_{12}L^{Py}_{24}$ , the intensity decreases linearly upon dilution (from bottom to top, 1.25, 1.66, 2.5 and 5 times diluted).

### Column chromatography on self-assembled $Pt_nL^{OMe}_{2n}$ (SI9)

10 mL 0.41 mM solution of  $Pt_nL^{OMe}_{2n}$  in MeCN was prepared by heating 100 mmol  $L^{OMe}$  with 55 mmol  $[Pt(BF_4)_2(MeCN)_4]$  for 3 d at 150°C in a high pressure vial. After the solution was cooled down to room temperature, it was added on 2 g of celithe and the solvent was evaporated *in vacuo*. The material was purified *via* column chromatography using methanol as eluent and silica (4 g) as the stationary phase. A yellow-colored fraction was



collected. The solvent was evaporated *in vacuo* and the solid material was dissolved in dmsO for MS analysis.

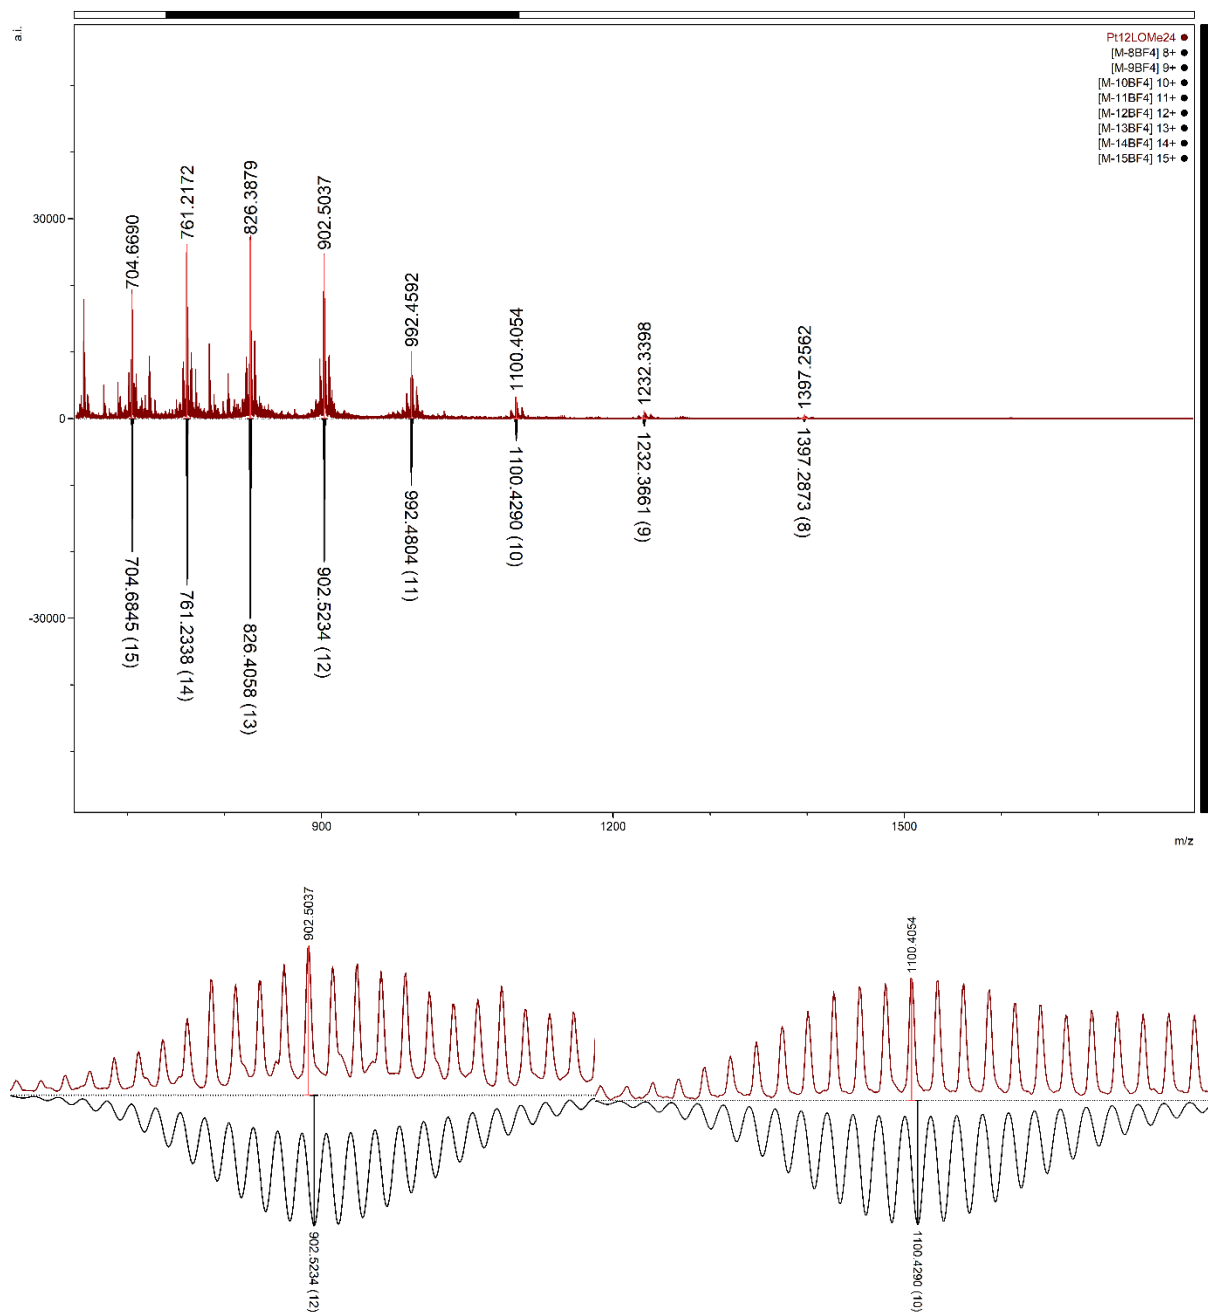

**Figure S119.** Full spectra of the columned  $\text{Pt}_{12}\text{LOMe}_{24}$  sample showing only the presence of  $\text{Pt}_{12}\text{LOMe}_{24}$ . Zoom in into the 10+ and 12+ species showing no overlap with other type of assemblies.

## Hydrodynamic Radius Considerations (SI10)

**Table S23.** Summary of calculated hydrodynamic radii for different type of Pt<sub>n</sub>L<sub>2n</sub> assemblies and the expected logD values.

| Sphere Size | Calc. Hydrodynamic r [nm] | Calc. Log D |
|-------------|---------------------------|-------------|
| M6L12       | 1.6                       | -9.40       |
| M8L16       | 1.8                       | -9.45       |
| M9L18       | 1.9                       | -9.47       |
| M12L24      | 2.3                       | -9.55       |

Despite the differences in size, the fitting of overlapping, slow diffusing species such as the Pt6L12 and Pt12L24 spheres as two separable components (within instrumental error) remains an experimental limitation of the technique. Because these two most distinguishable assemblies are never in solution in high quantities and other assemblies as well as oligomers are present, only an averaged diffusion coefficient is obtained in all experiments. This averaged diffusion coefficient is located between -9.4 to -9.55 for all formed structures regardless of the applied temperature.

## References

- [1] Julian M.W. Chan, Timothy M. Swager, *Tet. Lett.*, 49, 33, **2008**, 4912-4914.
- [2] D. Fujita, A. Takahashi, M. Fujita, *J. Am. Chem. Soc.* **2011**, 133, 34, 13317–13319.
- [3] R. C. Helgeson, B. P. Czech, E. Chapoteau, C. R. Gebauer, A. Kumar, D. J. Cram, *J. Am. Chem. Soc.* **1989**, 111, 16, 6339–6350.
- [4] R. Gramage-Doria, J. Hessels, S. H. A. M. Leenders, O. Tröppner, M. Dürr, I. Ivanović-Burmazović, J. N. H. Reek, *Angew. Chem. Int. Ed.*, 126, 49, **2014**, 13598-13602.
- [5] J. A. Murphy, F. Schoenebeck, N. J. Findlay, D. W. Thomson, S. Zhou, J. Garnier, *J. Am. Chem. Soc.* **2009**, 131, 18, 6475–6479.
- [6] A. M. Johnson, O. Moshe, A. S. Gamboa, B. W. Langloss, J. F. K. Limtiaco, C. K. Larive, R. J. Hooley, *Inorg. Chem.* **2011**, 50, 19, 9430–9442.
- [7] K. Suzuki, M. Kawano, M. Fujita, *Angew. Chem. Int. Ed.* 46, 16, **2007**, 2819-2822.
- [8] D. Poole, E. O. Bobylev, S. Mathew, J. N. H. Reek, **2020**, *Chem. Sci.*, 11, 12350-12357.
- [9] R. M. Betz, R. C. Walker, *J. Comput. Chem.*, **2015**, 36, 2, 79–87.
- [10] Gaussian 16, Revision C.01, M. J. Frisch, G. W. Trucks, H. B. Schlegel, G. E. Scuseria, M. A. Robb, J. R. Cheeseman, G. Scalmani, V. Barone, G. A. Petersson, H. Nakatsuji, X. Li, M. Caricato, A. V. Marenich, J. Bloino, B. G. Janesko, R. Gomperts, B. Mennucci, H. P. Hratchian, J. V. Ortiz, A. F. Izmaylov, J. L. Sonnenberg, D. Williams-Young, F. Ding, F. Lipparini, F. Egidi, J. Goings, B. Peng, A. Petrone, T. Henderson, D. Ranasinghe, V. G. Zakrzewski, J. Gao, N.

Rega, G. Zheng, W. Liang, M. Hada, M. Ehara, K. Toyota, R. Fukuda, J. Hasegawa, M. Ishida, T. Nakajima, Y. Honda, O. Kitao, H. Nakai, T. Vreven, K. Throssell, J. A. Montgomery, Jr., J. E. Peralta, F. Ogliaro, M. J. Bearpark, J. J. Heyd, E. N. Brothers, K. N. Kudin, V. N. Staroverov, T. A. Keith, R. Kobayashi, J. Normand, K. Raghavachari, A. P. Rendell, J. C. Burant, S. S. Iyengar, J. Tomasi, M. Cossi, J. M. Millam, M. Klene, C. Adamo, R. Cammi, J. W. Ochterski, R. L. Martin, K. Morokuma, O. Farkas, J. B. Foresman, and D. J. Fox, Gaussian, Inc., Wallingford CT, 2016.

[11] P. Li, B. P. Roberts, D. K. Chakravorty, K. M. Merz, *J. Chem. Theory Comput.*, **2013**, 9, 6, 2733–2748.

[12] A. D. McLachlan, *Acta Crystallogr. Sect. A*, **1982**, 38, 6, 871–873.

[13] D. A. Case, T. E. Cheatham, T. Darden, H. Gohlke, R. Luo, K. M. Merz, A. Onufriev, C. Simmerling, B. Wang, R. J. Woods, *J. Comput. Chem.*, **2005**, 26, 16, 1668–1688.

[14] A. W. Goetz, M. J. Williamson, D. Xu, D. Poole, S. Le Grand, R. C. Walker, *J. Chem. Theory Comput.*, **2012**, 8, 1542–1555.
